# Supplementary material for: Regulatory network analysis of Paneth cell and goblet cell enriched gut organoids using transcriptomics approaches
Source: bioRxiv preprint, doi:10.1101/575845, version 4 (2019-10-10)
Supplement: Table S1 [file 575845_file06.xlsx]

## Sheet: Paneth_v_conventional
target_id	gene_name	qval	log2fc	final_annotation	known_gene_type	known_transcript_type	novel_gene_type	novel_gene_transcript_type	novel_gene_transcript_class_code
ENSMUSG00000106095	2010110G14Rik	4.22e-08	-7.78854	lncRNA	lincRNA	lincRNA	NA	NA	NA
ENSMUSG00000110755	RP24-282C4.11	1.12e-41	-5.62899	lncRNA	lincRNA	lincRNA	NA	NA	NA
ENSMUSG00000097615	Gm2061	3.06e-08	-5.49557	lncRNA	lincRNA	lincRNA	NA	NA	NA
ENSMUSG00000097414	B130046B21Rik	2.23e-11	-4.62387	lncRNA	lincRNA	lincRNA	NA	NA	NA
ENSMUSG00000038917	3930402G23Rik	3.85e-14	-4.44005	lncRNA	lincRNA	lincRNA	NA	NA	NA
ENSMUSG00000085126	Gm12589	4.17e-08	-4.42012	lncRNA	lincRNA	lincRNA	NA	NA	NA
ENSMUSG00000104557	Gm36520	0.000352665	-4.15606	lncRNA	lincRNA	lincRNA	NA	NA	NA
ENSMUSG00000097632	4930552P12Rik	3.25e-08	-3.96662	lncRNA	lincRNA	lincRNA	NA	NA	NA
ENSMUSG00000059631	1500035N22Rik	2.32e-06	-3.95625	lncRNA	lincRNA	lincRNA	NA	NA	NA
ENSMUSG00000097673	Gm26608	1.34e-14	-3.70025	lncRNA	lincRNA	lincRNA	NA	NA	NA
ENSMUSG00000079174	Gm3054	0.0124137	-3.57595	lncRNA	lincRNA	lincRNA	NA	NA	NA
ENSMUSG00000097203	4732419C18Rik	1.04e-11	-3.54732	lncRNA	lincRNA	lincRNA	NA	NA	NA
ENSMUSG00000097184	4632428C04Rik	3.66e-08	-3.41254	lncRNA	lincRNA	lincRNA	NA	NA	NA
ENSMUSG00000111731	RP23-225D5.4	4.23e-07	-3.36117	lncRNA	lincRNA	lincRNA	NA	NA	NA
ENSMUSG00000087357	Gm12498	0.000624524	-3.26225	lncRNA	lincRNA	lincRNA	NA	NA	NA
ENSMUSG00000097932	C430039J16Rik	0.000361388	-3.17638	lncRNA	lincRNA	lincRNA	NA	NA	NA
ENSMUSG00000109265	Gm45000	1.56e-09	-3.13857	lncRNA	lincRNA	lincRNA	NA	NA	NA
ENSMUSG00000107689	Gm44386	0.00428436	-3.1284	lncRNA	lincRNA	lincRNA	NA	NA	NA
ENSMUSG00000097310	A930038B10Rik	2.22e-08	-3.12271	lncRNA	lincRNA	lincRNA	NA	NA	NA
ENSMUSG00000100975	Gm28875	0.00184772	-3.04268	lncRNA	lincRNA	lincRNA	NA	NA	NA
ENSMUSG00000087179	Gm14230	4.87e-07	-2.87311	lncRNA	lincRNA	lincRNA	NA	NA	NA
ENSMUSG00000109084	Gm44955	0.00149146	-2.61677	lncRNA	lincRNA	lincRNA	NA	NA	NA
ENSMUSG00000107503	Gm44009	0.00706313	-2.52115	lncRNA	lincRNA	lincRNA	NA	NA	NA
ENSMUSG00000102362	4930509J09Rik	0.00674205	-2.4679	lncRNA	lincRNA	lincRNA	NA	NA	NA
ENSMUSG00000108961	Gm32540	2.42e-09	-2.4496	lncRNA	lincRNA	lincRNA	NA	NA	NA
ENSMUSG00000106634	Gm43042	9.83e-09	-2.44127	lncRNA	lincRNA	lincRNA	NA	NA	NA
ENSMUSG00000108356	9130221F21Rik	3.13e-06	-2.33401	lncRNA	lincRNA	lincRNA	NA	NA	NA
ENSMUSG00000110239	Gm45620	0.000472676	-2.32611	lncRNA	lincRNA	lincRNA	NA	NA	NA
ENSMUSG00000096940	Gm4755	2.13e-05	-2.19388	lncRNA	lincRNA	lincRNA	NA	NA	NA
ENSMUSG00000042976	9930038B18Rik	0.0051948	-2.14727	lncRNA	lincRNA	lincRNA	NA	NA	NA
ENSMUSG00000097413	A830052D11Rik	6.2e-05	-2.11942	lncRNA	lincRNA	lincRNA	NA	NA	NA
ENSMUSG00000102106	2310043O21Rik	6.69e-05	-2.11549	lncRNA	lincRNA	lincRNA	NA	NA	NA
ENSMUSG00000097727	F630040K05Rik	0.00314048	-2.09605	lncRNA	lincRNA	lincRNA	NA	NA	NA
ENSMUSG00000084807	Gm13073	0.0195996	-2.0438	lncRNA	lincRNA	lincRNA	NA	NA	NA
ENSMUSG00000097088	Gm26615	0.0275899	-1.95853	lncRNA	lincRNA	lincRNA	NA	NA	NA
ENSMUSG00000105105	Gm31363	0.000285232	-1.93038	lncRNA	lincRNA	lincRNA	NA	NA	NA
ENSMUSG00000102011	Gm28930	7.54e-11	-1.85805	lncRNA	lincRNA	lincRNA	NA	NA	NA
ENSMUSG00000097779	4833407H14Rik	0.00153552	-1.83491	lncRNA	lincRNA	lincRNA	NA	NA	NA
ENSMUSG00000085017	Gm13412	0.0433906	-1.77116	lncRNA	lincRNA	lincRNA	NA	NA	NA
ENSMUSG00000097281	Gm26685	0.0327081	-1.68493	lncRNA	lincRNA	lincRNA	NA	NA	NA
ENSMUSG00000097908	4933404O12Rik	0.0117722	-1.57296	lncRNA	lincRNA	lincRNA	NA	NA	NA
ENSMUSG00000111857	RP23-392I13.13	0.00336612	-1.557	lncRNA	lincRNA	lincRNA	NA	NA	NA
ENSMUSG00000097284	4930480K23Rik	0.00466408	-1.48128	lncRNA	lincRNA	lincRNA	NA	NA	NA
ENSMUSG00000100714	2010308F09Rik	0.00884016	-1.46425	lncRNA	lincRNA	lincRNA	NA	NA	NA
ENSMUSG00000110697	RP23-312B17.2	8.14e-06	-1.41984	lncRNA	lincRNA	lincRNA	NA	NA	NA
ENSMUSG00000097519	4930558J18Rik	0.0243608	-1.41836	lncRNA	lincRNA	lincRNA	NA	NA	NA
ENSMUSG00000097523	1700022N22Rik	0.0461545	-1.37791	lncRNA	lincRNA	lincRNA	NA	NA	NA
ENSMUSG00000087196	Gm13373	0.0425078	-1.35261	lncRNA	lincRNA	lincRNA	NA	NA	NA
ENSMUSG00000096959	4930509G22Rik	0.0103409	-1.34919	lncRNA	lincRNA	lincRNA	NA	NA	NA
ENSMUSG00000085180	AI838599	0.049367	-1.3429	lncRNA	lincRNA	lincRNA	NA	NA	NA
ENSMUSG00000075511	1700001L05Rik	2.18e-08	-1.34271	lncRNA	lincRNA	lincRNA	NA	NA	NA
ENSMUSG00000097514	Gm17619	0.0479085	-1.3406	lncRNA	lincRNA	lincRNA	NA	NA	NA
ENSMUSG00000104011	Gm32391	0.00520475	-1.27862	lncRNA	lincRNA	lincRNA	NA	NA	NA
ENSMUSG00000097222	1010001N08Rik	3.32e-07	-1.26384	lncRNA	lincRNA	lincRNA	NA	NA	NA
ENSMUSG00000111202	RP24-236E2.3	0.0249367	-1.26102	lncRNA	lincRNA	lincRNA	NA	NA	NA
ENSMUSG00000087574	C030037D09Rik	0.0352649	-1.22334	lncRNA	lincRNA	lincRNA	NA	NA	NA
ENSMUSG00000097415	AU020206	0.00250084	-1.20776	lncRNA	lincRNA	lincRNA	NA	NA	NA
ENSMUSG00000105283	Gm33370	0.00092226	-1.17542	lncRNA	lincRNA	lincRNA	NA	NA	NA
ENSMUSG00000097006	9530082P21Rik	0.00654057	-1.15671	lncRNA	lincRNA	lincRNA	NA	NA	NA
ENSMUSG00000097566	A930024N18Rik	0.0481879	-1.14617	lncRNA	lincRNA	lincRNA	NA	NA	NA
ENSMUSG00000097354	2310001H17Rik	0.000214148	-1.11108	lncRNA	lincRNA	lincRNA	NA	NA	NA
ENSMUSG00000107481	4833403J16Rik	0.0106185	-1.08345	lncRNA	lincRNA	lincRNA	NA	NA	NA
ENSMUSG00000096918	Gm16863	0.0116124	-1.04367	lncRNA	lincRNA	lincRNA	NA	NA	NA
ENSMUSG00000097887	Gm26542	0.0167031	-1.03534	lncRNA	lincRNA	lincRNA	NA	NA	NA
ENSMUSG00000097709	2810429I04Rik	0.0327689	-1.02926	lncRNA	lincRNA	lincRNA	NA	NA	NA
ENSMUSG00000102917	Gm37724	0.00216457	-1.02657	lncRNA	lincRNA	lincRNA	NA	NA	NA
ENSMUSG00000099843	Gm7160	0.0348348	1.05492	lncRNA	lincRNA	lincRNA	NA	NA	NA
ENSMUSG00000097561	4632411P08Rik	0.0106881	1.06038	lncRNA	lincRNA	lincRNA	NA	NA	NA
ENSMUSG00000108084	Gm7932	0.0144742	1.07195	lncRNA	lincRNA	lincRNA	NA	NA	NA
ENSMUSG00000097056	Gm4262	0.000424605	1.07937	lncRNA	lincRNA	lincRNA	NA	NA	NA
ENSMUSG00000097059	Fam120aos	5.16e-05	1.11252	lncRNA	lincRNA	lincRNA	NA	NA	NA
ENSMUSG00000097080	1700086O06Rik	0.0101701	1.12314	lncRNA	lincRNA	lincRNA	NA	NA	NA
ENSMUSG00000038152	5033430I15Rik	0.0158595	1.12614	lncRNA	lincRNA	lincRNA	NA	NA	NA
ENSMUSG00000073147	5031425E22Rik	3.75e-05	1.13262	lncRNA	lincRNA	lincRNA	NA	NA	NA
ENSMUSG00000097039	Pvt1	0.000838467	1.13554	lncRNA	lincRNA	lincRNA	NA	NA	NA
ENSMUSG00000097305	Gm17276	0.0135516	1.13914	lncRNA	lincRNA	lincRNA	NA	NA	NA
ENSMUSG00000097787	2700046G09Rik	0.000736622	1.14427	lncRNA	lincRNA	lincRNA	NA	NA	NA
ENSMUSG00000092274	Neat1	0.00738798	1.19233	lncRNA	lincRNA	lincRNA	NA	NA	NA
ENSMUSG00000103067	Gm30414	0.0147491	1.22279	lncRNA	lincRNA	lincRNA	NA	NA	NA
ENSMUSG00000097287	D130017N08Rik	0.00402501	1.2473	lncRNA	lincRNA	lincRNA	NA	NA	NA
ENSMUSG00000097277	2900076A07Rik	0.00915132	1.24761	lncRNA	lincRNA	lincRNA	NA	NA	NA
ENSMUSG00000090086	AI480526	0.0101912	1.2497	lncRNA	lincRNA	lincRNA	NA	NA	NA
ENSMUSG00000073590	3222401L13Rik	0.0352786	1.36162	lncRNA	lincRNA	lincRNA	NA	NA	NA
ENSMUSG00000107121	1110006O24Rik	0.000635338	1.39136	lncRNA	lincRNA	lincRNA	NA	NA	NA
ENSMUSG00000086141	9030622O22Rik	0.00169311	1.40698	lncRNA	lincRNA	lincRNA	NA	NA	NA
ENSMUSG00000099025	Gm27162	0.000145866	1.42199	lncRNA	lincRNA	lincRNA	NA	NA	NA
ENSMUSG00000097674	Gm26610	0.0256375	1.43881	lncRNA	lincRNA	lincRNA	NA	NA	NA
ENSMUSG00000103043	Gm37306	0.00239007	1.47734	lncRNA	lincRNA	lincRNA	NA	NA	NA
ENSMUSG00000110276	Gm45330	2.81e-13	1.47779	lncRNA	lincRNA	lincRNA	NA	NA	NA
ENSMUSG00000092178	Gm45351	0.00606297	1.52435	lncRNA	lincRNA	lincRNA	NA	NA	NA
ENSMUSG00000097123	Gm6297	0.0193614	1.53447	lncRNA	lincRNA	lincRNA	NA	NA	NA
ENSMUSG00000097842	9330104G04Rik	0.00306125	1.60199	lncRNA	lincRNA	lincRNA	NA	NA	NA
ENSMUSG00000097165	2210008F06Rik	0.0299247	1.7233	lncRNA	lincRNA	lincRNA	NA	NA	NA
ENSMUSG00000085024	C230035I16Rik	0.0132195	1.74307	lncRNA	lincRNA	lincRNA	NA	NA	NA
ENSMUSG00000106874	Gm20186	1.21e-15	1.75169	lncRNA	lincRNA	lincRNA	NA	NA	NA
ENSMUSG00000097785	B230217O12Rik	0.0344929	1.85637	lncRNA	lincRNA	lincRNA	NA	NA	NA
ENSMUSG00000086320	Gm12840	0.000250987	1.86692	lncRNA	lincRNA	lincRNA	NA	NA	NA
ENSMUSG00000044522	A730020M07Rik	0.0400554	1.88811	lncRNA	lincRNA	lincRNA	NA	NA	NA
ENSMUSG00000097131	D230017M19Rik	0.00890275	1.9083	lncRNA	lincRNA	lincRNA	NA	NA	NA
ENSMUSG00000074274	D930028M14Rik	0.00701543	1.93071	lncRNA	lincRNA	lincRNA	NA	NA	NA
ENSMUSG00000106547	B230303O12Rik	0.04493	1.93646	lncRNA	lincRNA	lincRNA	NA	NA	NA
ENSMUSG00000105957	Gm43254	1.63e-05	1.94862	lncRNA	lincRNA	lincRNA	NA	NA	NA
ENSMUSG00000108845	Gm45090	3e-12	1.97978	lncRNA	lincRNA	lincRNA	NA	NA	NA
ENSMUSG00000097027	Gm26559	0.0340513	1.99408	lncRNA	lincRNA	lincRNA	NA	NA	NA
ENSMUSG00000097767	Miat	0.016906	1.99533	lncRNA	lincRNA	lincRNA	NA	NA	NA
ENSMUSG00000107879	9330102E08Rik	0.0137828	2.13779	lncRNA	lincRNA	lincRNA	NA	NA	NA
ENSMUSG00000107768	Gm44275	0.0114846	2.16945	lncRNA	lincRNA	lincRNA	NA	NA	NA
ENSMUSG00000097873	Gm26867	0.0257098	2.26123	lncRNA	lincRNA	lincRNA	NA	NA	NA
ENSMUSG00000097494	4933406C10Rik	0.00625971	2.26934	lncRNA	lincRNA	lincRNA	NA	NA	NA
ENSMUSG00000075010	AW112010	0.00122867	2.27137	lncRNA	lincRNA	lincRNA	NA	NA	NA
ENSMUSG00000096995	2810029C07Rik	8.65e-06	2.4905	lncRNA	lincRNA	lincRNA	NA	NA	NA
ENSMUSG00000097601	Gm26660	0.00359761	2.57202	lncRNA	lincRNA	lincRNA	NA	NA	NA
ENSMUSG00000102123	Gm4319	0.0494293	2.5887	lncRNA	lincRNA	lincRNA	NA	NA	NA
ENSMUSG00000086782	E130102H24Rik	0.00165778	2.67428	lncRNA	lincRNA	lincRNA	NA	NA	NA
ENSMUSG00000097797	Gm26901	0.034725	2.72617	lncRNA	lincRNA	lincRNA,retained_intron	NA	NA	NA
ENSMUSG00000085183	Gm12603	8.11e-06	2.74602	lncRNA	lincRNA	lincRNA	NA	NA	NA
ENSMUSG00000097347	Gm17275	0.0248763	2.82535	lncRNA	lincRNA	lincRNA	NA	NA	NA
ENSMUSG00000097527	1700112J16Rik	0.000295566	2.97274	lncRNA	lincRNA	lincRNA	NA	NA	NA
ENSMUSG00000096299	Gm21814	0.00914914	3.04182	lncRNA	lincRNA	lincRNA	NA	NA	NA
ENSMUSG00000078956	Gm14221	1.53e-06	3.08418	lncRNA	lincRNA	lincRNA	NA	NA	NA
ENSMUSG00000108801	Gm44514	0.0012038	3.15932	lncRNA	lincRNA	lincRNA	NA	NA	NA
ENSMUSG00000071567	A830039N20Rik	0.001005	3.16092	lncRNA	lincRNA	lincRNA	NA	NA	NA
ENSMUSG00000085007	Gm11549	0.000287116	3.25495	lncRNA	lincRNA	lincRNA	NA	NA	NA
ENSMUSG00000089712	Gm15889	2.2e-18	3.30574	lncRNA	lincRNA	lincRNA	NA	NA	NA
ENSMUSG00000105146	Gm43861	1.47e-05	3.33034	lncRNA	lincRNA	lincRNA	NA	NA	NA
ENSMUSG00000111528	RP24-499N24.6	1.32e-05	3.35702	lncRNA	lincRNA	lincRNA	NA	NA	NA
ENSMUSG00000099148	Gm3331	6.66e-05	3.61222	lncRNA	lincRNA	lincRNA	NA	NA	NA
ENSMUSG00000085329	2810404F17Rik	1.42e-07	3.6423	lncRNA	lincRNA	lincRNA	NA	NA	NA
ENSMUSG00000096944	Gm26722	0.00533087	3.78804	lncRNA	lincRNA	lincRNA	NA	NA	NA
ENSMUSG00000087211	Lhx1os	1.29e-07	4.0135	lncRNA	lincRNA	lincRNA	NA	NA	NA
ENSMUSG00000109957	Gm45353	1.27e-05	4.23268	lncRNA	lincRNA	lincRNA	NA	NA	NA
ENSMUSG00000106139	Gm43194	2.29e-13	4.61786	lncRNA	lincRNA	lincRNA	NA	NA	NA
mmu-miR-210-5p	mmu-miR-210-5p	5.58e-37	-7.29935	miRNA	miRNA	miRNA	NA	NA	NA
mmu-miR-210-3p	mmu-miR-210-3p	7.74e-21	-5.04494	miRNA	miRNA	miRNA	NA	NA	NA
mmu-miR-351-5p	mmu-miR-351-5p	2.68e-06	-3.97859	miRNA	miRNA	miRNA	NA	NA	NA
mmu-miR-449c-5p	mmu-miR-449c-5p	4e-07	-3.86166	miRNA	miRNA	miRNA	NA	NA	NA
mmu-miR-194-1-3p	mmu-miR-194-1-3p	2.37e-13	-3.79109	miRNA	miRNA	miRNA	NA	NA	NA
mmu-miR-147-3p	mmu-miR-147-3p	3.42e-07	-3.68662	miRNA	miRNA	miRNA	NA	NA	NA
mmu-miR-205-3p	mmu-miR-205-3p	0.0451	-3.49052	miRNA	miRNA	miRNA	NA	NA	NA
mmu-miR-3076-3p	mmu-miR-3076-3p	5.91e-05	-3.36288	miRNA	miRNA	miRNA	NA	NA	NA
mmu-miR-3103-3p	mmu-miR-3103-3p	0.00832	-3.21258	miRNA	miRNA	miRNA	NA	NA	NA
mmu-miR-218-1-3p	mmu-miR-218-1-3p	0.000212	-3.19951	miRNA	miRNA	miRNA	NA	NA	NA
mmu-miR-215-3p	mmu-miR-215-3p	1.67e-07	-2.56587	miRNA	miRNA	miRNA	NA	NA	NA
mmu-miR-215-5p	mmu-miR-215-5p	7.99e-09	-2.5186	miRNA	miRNA	miRNA	NA	NA	NA
mmu-miR-218-5p	mmu-miR-218-5p	1.16e-05	-2.26568	miRNA	miRNA	miRNA	NA	NA	NA
mmu-miR-3535	mmu-miR-3535	0.00018	-2.20512	miRNA	miRNA	miRNA	NA	NA	NA
mmu-miR-6539	mmu-miR-6539	5.52e-07	-2.18462	miRNA	miRNA	miRNA	NA	NA	NA
mmu-miR-92b-3p	mmu-miR-92b-3p	1.23e-05	-2.16566	miRNA	miRNA	miRNA	NA	NA	NA
mmu-miR-1948-3p	mmu-miR-1948-3p	0.0126	-2.13915	miRNA	miRNA	miRNA	NA	NA	NA
mmu-miR-92a-3p	mmu-miR-92a-3p	2.85e-08	-2.05415	miRNA	miRNA	miRNA	NA	NA	NA
mmu-miR-1981-3p	mmu-miR-1981-3p	0.000626	-1.98511	miRNA	miRNA	miRNA	NA	NA	NA
mmu-miR-1981-5p	mmu-miR-1981-5p	0.000686	-1.90069	miRNA	miRNA	miRNA	NA	NA	NA
mmu-miR-222-3p	mmu-miR-222-3p	2.39e-06	-1.89671	miRNA	miRNA	miRNA	NA	NA	NA
mmu-miR-1947-5p	mmu-miR-1947-5p	0.00126	-1.89042	miRNA	miRNA	miRNA	NA	NA	NA
mmu-miR-3057-5p	mmu-miR-3057-5p	0.00166	-1.86731	miRNA	miRNA	miRNA	NA	NA	NA
mmu-miR-702-3p	mmu-miR-702-3p	0.0259	-1.85423	miRNA	miRNA	miRNA	NA	NA	NA
mmu-miR-205-5p	mmu-miR-205-5p	3.53e-05	-1.7407	miRNA	miRNA	miRNA	NA	NA	NA
mmu-miR-378b	mmu-miR-378b	0.0384	-1.73991	miRNA	miRNA	miRNA	NA	NA	NA
mmu-miR-221-5p	mmu-miR-221-5p	0.00102	-1.73414	miRNA	miRNA	miRNA	NA	NA	NA
mmu-miR-378a-3p	mmu-miR-378a-3p	5.89e-06	-1.70828	miRNA	miRNA	miRNA	NA	NA	NA
mmu-miR-378d	mmu-miR-378d	2.91e-05	-1.66921	miRNA	miRNA	miRNA	NA	NA	NA
mmu-miR-423-3p	mmu-miR-423-3p	0.000811	-1.6174	miRNA	miRNA	miRNA	NA	NA	NA
mmu-miR-1964-3p	mmu-miR-1964-3p	0.0281	-1.52811	miRNA	miRNA	miRNA	NA	NA	NA
mmu-miR-298-5p	mmu-miR-298-5p	0.00289	-1.51247	miRNA	miRNA	miRNA	NA	NA	NA
mmu-miR-677-5p	mmu-miR-677-5p	0.00811	-1.50655	miRNA	miRNA	miRNA	NA	NA	NA
mmu-miR-130b-5p	mmu-miR-130b-5p	0.00182	-1.50361	miRNA	miRNA	miRNA	NA	NA	NA
mmu-miR-3105-3p	mmu-miR-3105-3p	0.0211	-1.47863	miRNA	miRNA	miRNA	NA	NA	NA
mmu-miR-15b-5p	mmu-miR-15b-5p	0.000361	-1.44757	miRNA	miRNA	miRNA	NA	NA	NA
mmu-miR-222-5p	mmu-miR-222-5p	0.0444	-1.43283	miRNA	miRNA	miRNA	NA	NA	NA
mmu-miR-146b-5p	mmu-miR-146b-5p	0.000374	-1.39891	miRNA	miRNA	miRNA	NA	NA	NA
mmu-miR-330-5p	mmu-miR-330-5p	0.012	-1.38642	miRNA	miRNA	miRNA	NA	NA	NA
mmu-miR-126a-5p	mmu-miR-126a-5p	0.00419	-1.34517	miRNA	miRNA	miRNA	NA	NA	NA
mmu-miR-486a-5p=mmu-miR-486b-5p	mmu-miR-486a-5p=mmu-miR-486b-5p	0.00313	-1.30814	miRNA	miRNA	miRNA	NA	NA	NA
mmu-miR-194-5p	mmu-miR-194-5p	0.00201	-1.29904	miRNA	miRNA	miRNA	NA	NA	NA
mmu-miR-421-3p	mmu-miR-421-3p	0.00382	-1.24939	miRNA	miRNA	miRNA	NA	NA	NA
mmu-miR-18a-3p	mmu-miR-18a-3p	0.0129	-1.1877	miRNA	miRNA	miRNA	NA	NA	NA
mmu-miR-30c-1-3p	mmu-miR-30c-1-3p	0.00888	-1.16651	miRNA	miRNA	miRNA	NA	NA	NA
mmu-miR-25-5p	mmu-miR-25-5p	0.0435	-1.16244	miRNA	miRNA	miRNA	NA	NA	NA
mmu-miR-92a-1-5p	mmu-miR-92a-1-5p	0.0104	-1.15733	miRNA	miRNA	miRNA	NA	NA	NA
mmu-miR-151-3p	mmu-miR-151-3p	0.0107	-1.08535	miRNA	miRNA	miRNA	NA	NA	NA
mmu-miR-326-3p	mmu-miR-326-3p	0.0353	-1.06955	miRNA	miRNA	miRNA	NA	NA	NA
mmu-miR-15a-5p	mmu-miR-15a-5p	0.00695	1.01688	miRNA	miRNA	miRNA	NA	NA	NA
mmu-miR-21a-3p	mmu-miR-21a-3p	0.0151	1.04063	miRNA	miRNA	miRNA	NA	NA	NA
mmu-miR-31-3p	mmu-miR-31-3p	0.0436	1.05813	miRNA	miRNA	miRNA	NA	NA	NA
mmu-miR-132-3p	mmu-miR-132-3p	0.0431	1.06064	miRNA	miRNA	miRNA	NA	NA	NA
mmu-miR-148a-3p	mmu-miR-148a-3p	0.00313	1.12342	miRNA	miRNA	miRNA	NA	NA	NA
mmu-let-7a-1-3p=mmu-let-7c-2-3p	mmu-let-7a-1-3p=mmu-let-7c-2-3p	0.0373	1.14379	miRNA	miRNA	miRNA	NA	NA	NA
mmu-miR-181c-5p	mmu-miR-181c-5p	0.0084	1.22133	miRNA	miRNA	miRNA	NA	NA	NA
mmu-miR-200a-3p	mmu-miR-200a-3p	0.000707	1.22959	miRNA	miRNA	miRNA	NA	NA	NA
mmu-miR-140-5p	mmu-miR-140-5p	0.00602	1.23609	miRNA	miRNA	miRNA	NA	NA	NA
mmu-miR-181a-1-3p	mmu-miR-181a-1-3p	0.00724	1.27167	miRNA	miRNA	miRNA	NA	NA	NA
mmu-miR-24-3p	mmu-miR-24-3p	0.00358	1.27513	miRNA	miRNA	miRNA	NA	NA	NA
mmu-miR-872-3p	mmu-miR-872-3p	0.00518	1.28754	miRNA	miRNA	miRNA	NA	NA	NA
mmu-miR-99b-3p	mmu-miR-99b-3p	0.0126	1.29388	miRNA	miRNA	miRNA	NA	NA	NA
mmu-miR-29a-3p	mmu-miR-29a-3p	0.00149	1.30064	miRNA	miRNA	miRNA	NA	NA	NA
mmu-let-7e-5p	mmu-let-7e-5p	0.00254	1.30343	miRNA	miRNA	miRNA	NA	NA	NA
mmu-miR-872-5p	mmu-miR-872-5p	0.00196	1.31521	miRNA	miRNA	miRNA	NA	NA	NA
mmu-miR-152-5p	mmu-miR-152-5p	0.015	1.316	miRNA	miRNA	miRNA	NA	NA	NA
mmu-miR-497a-5p	mmu-miR-497a-5p	0.00439	1.33675	miRNA	miRNA	miRNA	NA	NA	NA
mmu-miR-27a-3p	mmu-miR-27a-3p	0.00308	1.35183	miRNA	miRNA	miRNA	NA	NA	NA
mmu-miR-23a-3p	mmu-miR-23a-3p	0.00333	1.37181	miRNA	miRNA	miRNA	NA	NA	NA
mmu-miR-342-3p	mmu-miR-342-3p	0.000407	1.38929	miRNA	miRNA	miRNA	NA	NA	NA
mmu-miR-96-5p	mmu-miR-96-5p	0.000658	1.4121	miRNA	miRNA	miRNA	NA	NA	NA
mmu-miR-19a-3p	mmu-miR-19a-3p	0.0013	1.4459	miRNA	miRNA	miRNA	NA	NA	NA
mmu-miR-1839-3p	mmu-miR-1839-3p	0.00297	1.44734	miRNA	miRNA	miRNA	NA	NA	NA
mmu-miR-19b-3p	mmu-miR-19b-3p	0.000893	1.45122	miRNA	miRNA	miRNA	NA	NA	NA
mmu-miR-30b-5p	mmu-miR-30b-5p	5.17e-05	1.47476	miRNA	miRNA	miRNA	NA	NA	NA
mmu-miR-24-2-5p	mmu-miR-24-2-5p	0.00388	1.5058	miRNA	miRNA	miRNA	NA	NA	NA
mmu-miR-125a-3p	mmu-miR-125a-3p	0.0151	1.51008	miRNA	miRNA	miRNA	NA	NA	NA
mmu-miR-340-5p	mmu-miR-340-5p	0.000105	1.56673	miRNA	miRNA	miRNA	NA	NA	NA
mmu-miR-700-5p	mmu-miR-700-5p	0.00156	1.57614	miRNA	miRNA	miRNA	NA	NA	NA
mmu-miR-99b-5p	mmu-miR-99b-5p	0.00127	1.58665	miRNA	miRNA	miRNA	NA	NA	NA
mmu-miR-99a-5p	mmu-miR-99a-5p	0.00466	1.70641	miRNA	miRNA	miRNA	NA	NA	NA
mmu-miR-700-3p	mmu-miR-700-3p	0.000125	1.79761	miRNA	miRNA	miRNA	NA	NA	NA
mmu-miR-5121	mmu-miR-5121	0.00113	1.81453	miRNA	miRNA	miRNA	NA	NA	NA
mmu-miR-139-5p	mmu-miR-139-5p	3.69e-06	1.84967	miRNA	miRNA	miRNA	NA	NA	NA
mmu-miR-141-3p	mmu-miR-141-3p	3.53e-05	1.86114	miRNA	miRNA	miRNA	NA	NA	NA
mmu-miR-33-5p	mmu-miR-33-5p	0.00333	1.94619	miRNA	miRNA	miRNA	NA	NA	NA
mmu-miR-29a-5p	mmu-miR-29a-5p	0.0107	1.96625	miRNA	miRNA	miRNA	NA	NA	NA
mmu-miR-375-3p	mmu-miR-375-3p	7.53e-07	2.00981	miRNA	miRNA	miRNA	NA	NA	NA
mmu-miR-6538	mmu-miR-6538	0.00302	2.037	miRNA	miRNA	miRNA	NA	NA	NA
mmu-miR-32-5p	mmu-miR-32-5p	3.53e-05	2.07027	miRNA	miRNA	miRNA	NA	NA	NA
mmu-miR-375-5p	mmu-miR-375-5p	0.000695	2.07183	miRNA	miRNA	miRNA	NA	NA	NA
mmu-miR-7a-5p	mmu-miR-7a-5p	3.66e-09	2.08326	miRNA	miRNA	miRNA	NA	NA	NA
mmu-miR-574-3p	mmu-miR-574-3p	1.33e-07	2.09964	miRNA	miRNA	miRNA	NA	NA	NA
mmu-miR-29b-3p	mmu-miR-29b-3p	1.13e-06	2.14228	miRNA	miRNA	miRNA	NA	NA	NA
mmu-miR-195a-5p	mmu-miR-195a-5p	3.63e-06	2.16229	miRNA	miRNA	miRNA	NA	NA	NA
mmu-miR-125b-5p	mmu-miR-125b-5p	0.00106	2.21206	miRNA	miRNA	miRNA	NA	NA	NA
mmu-miR-10a-5p	mmu-miR-10a-5p	8.48e-07	2.23068	miRNA	miRNA	miRNA	NA	NA	NA
mmu-miR-29c-3p	mmu-miR-29c-3p	1.74e-08	2.3044	miRNA	miRNA	miRNA	NA	NA	NA
mmu-miR-125b-2-3p	mmu-miR-125b-2-3p	0.000223	2.33981	miRNA	miRNA	miRNA	NA	NA	NA
mmu-miR-20b-5p	mmu-miR-20b-5p	0.0269	2.35771	miRNA	miRNA	miRNA	NA	NA	NA
mmu-miR-33-3p	mmu-miR-33-3p	0.000119	2.37739	miRNA	miRNA	miRNA	NA	NA	NA
mmu-miR-7043-3p	mmu-miR-7043-3p	0.00602	2.47671	miRNA	miRNA	miRNA	NA	NA	NA
mmu-miR-212-3p	mmu-miR-212-3p	0.000658	2.47819	miRNA	miRNA	miRNA	NA	NA	NA
mmu-miR-187-3p	mmu-miR-187-3p	6.85e-07	2.53584	miRNA	miRNA	miRNA	NA	NA	NA
mmu-miR-146a-5p	mmu-miR-146a-5p	1.49e-08	2.60224	miRNA	miRNA	miRNA	NA	NA	NA
mmu-miR-101a-3p	mmu-miR-101a-3p	6.1e-13	2.63739	miRNA	miRNA	miRNA	NA	NA	NA
mmu-miR-101c	mmu-miR-101c	3.01e-13	2.63741	miRNA	miRNA	miRNA	NA	NA	NA
mmu-miR-219a-5p	mmu-miR-219a-5p	0.00149	2.65514	miRNA	miRNA	miRNA	NA	NA	NA
mmu-miR-101a-5p	mmu-miR-101a-5p	0.000568	2.69598	miRNA	miRNA	miRNA	NA	NA	NA
mmu-miR-362-3p	mmu-miR-362-3p	3.76e-07	2.73752	miRNA	miRNA	miRNA	NA	NA	NA
mmu-miR-152-3p	mmu-miR-152-3p	5.83e-11	2.74143	miRNA	miRNA	miRNA	NA	NA	NA
mmu-miR-184-3p	mmu-miR-184-3p	3.53e-05	2.80824	miRNA	miRNA	miRNA	NA	NA	NA
mmu-let-7e-3p	mmu-let-7e-3p	0.0113	2.85149	miRNA	miRNA	miRNA	NA	NA	NA
mmu-miR-5126	mmu-miR-5126	0.000337	2.9049	miRNA	miRNA	miRNA	NA	NA	NA
mmu-miR-598-3p	mmu-miR-598-3p	1.68e-09	2.92736	miRNA	miRNA	miRNA	NA	NA	NA
mmu-miR-350-5p	mmu-miR-350-5p	2.7e-05	2.98555	miRNA	miRNA	miRNA	NA	NA	NA
mmu-miR-7b-5p	mmu-miR-7b-5p	2.1e-14	3.22374	miRNA	miRNA	miRNA	NA	NA	NA
mmu-miR-143-3p	mmu-miR-143-3p	6.1e-13	3.2594	miRNA	miRNA	miRNA	NA	NA	NA
mmu-miR-10a-3p	mmu-miR-10a-3p	9.94e-11	3.29737	miRNA	miRNA	miRNA	NA	NA	NA
mmu-miR-145a-5p	mmu-miR-145a-5p	0.00548	3.45455	miRNA	miRNA	miRNA	NA	NA	NA
mmu-miR-350-3p	mmu-miR-350-3p	1.59e-07	3.64453	miRNA	miRNA	miRNA	NA	NA	NA
mmu-miR-199a-3p=mmu-miR-199b-3p	mmu-miR-199a-3p=mmu-miR-199b-3p	0.000361	3.96917	miRNA	miRNA	miRNA	NA	NA	NA
mmu-miR-1224-3p	mmu-miR-1224-3p	8.2e-06	4.10479	miRNA	miRNA	miRNA	NA	NA	NA
mmu-miR-7a-2-3p	mmu-miR-7a-2-3p	2.23e-26	4.30393	miRNA	miRNA	miRNA	NA	NA	NA
mmu-miR-1224-5p	mmu-miR-1224-5p	5.77e-23	4.56934	miRNA	miRNA	miRNA	NA	NA	NA
mmu-miR-879-5p	mmu-miR-879-5p	1.77e-08	4.8083	miRNA	miRNA	miRNA	NA	NA	NA
mmu-miR-137-3p	mmu-miR-137-3p	6.95e-11	4.97034	miRNA	miRNA	miRNA	NA	NA	NA
mmu-miR-129-5p	mmu-miR-129-5p	0.0113	5.50481	miRNA	miRNA	miRNA	NA	NA	NA
mmu-miR-153-3p	mmu-miR-153-3p	2.48e-31	5.59728	miRNA	miRNA	miRNA	NA	NA	NA
mmu-miR-879-3p	mmu-miR-879-3p	0.000117	6.32589	miRNA	miRNA	miRNA	NA	NA	NA
mmu-miR-344-3p	mmu-miR-344-3p	0.000353	6.33768	miRNA	miRNA	miRNA	NA	NA	NA
mmu-miR-99a-3p	mmu-miR-99a-3p	0.000107	6.37956	miRNA	miRNA	miRNA	NA	NA	NA
mmu-miR-7b-3p	mmu-miR-7b-3p	2.15e-05	6.59456	miRNA	miRNA	miRNA	NA	NA	NA
mmu-miR-3547-3p	mmu-miR-3547-3p	1.4e-05	6.60957	miRNA	miRNA	miRNA	NA	NA	NA
mmu-miR-708-3p	mmu-miR-708-3p	6.43e-06	6.78135	miRNA	miRNA	miRNA	NA	NA	NA
mmu-miR-1945	mmu-miR-1945	2.08e-06	6.90677	miRNA	miRNA	miRNA	NA	NA	NA
mmu-miR-708-5p	mmu-miR-708-5p	1.23e-06	6.94254	miRNA	miRNA	miRNA	NA	NA	NA
mmu-miR-204-5p	mmu-miR-204-5p	5.16e-33	7.20294	miRNA	miRNA	miRNA	NA	NA	NA
ENSMUSG00000107992	Gm44223	5e-14	-7.34827	other	unprocessed_pseudogene	unprocessed_pseudogene	NA	NA	NA
ENSMUSG00000098426	Gm27149	0.00630265	-6.73911	other	unprocessed_pseudogene	unprocessed_pseudogene	NA	NA	NA
ENSMUSG00000087700	Gm15283	5.62e-12	-6.2137	other	processed_transcript	processed_transcript	NA	NA	NA
ENSMUSG00000070522	Gm6505	0.0309194	-6.02578	other	processed_pseudogene	processed_pseudogene	NA	NA	NA
ENSMUSG00000087030	Gm16143	8.06e-08	-5.22666	other	antisense	antisense	NA	NA	NA
ENSMUSG00000080943	Gm13130	2.71e-17	-5.13717	other	unprocessed_pseudogene	unprocessed_pseudogene	NA	NA	NA
ENSMUSG00000101537	Gm29571	2.96e-09	-4.90302	other	antisense	antisense	NA	NA	NA
ENSMUSG00000083456	Gm13108	1.02e-08	-4.74533	other	unprocessed_pseudogene	unprocessed_pseudogene	NA	NA	NA
ENSMUSG00000055452	Gm7353	0.0178493	-4.68609	other	processed_pseudogene	processed_pseudogene	NA	NA	NA
ENSMUSG00000095457	Gm8989	3.52e-10	-4.64785	other	unprocessed_pseudogene	unprocessed_pseudogene	NA	NA	NA
ENSMUSG00000048949	Gm6206	0.0348348	-4.5795	other	processed_pseudogene	processed_pseudogene	NA	NA	NA
ENSMUSG00000100738	2010106C02Rik	5.03e-09	-4.57402	other	antisense	antisense	NA	NA	NA
ENSMUSG00000110639	RP23-146A22.1	1.15e-05	-4.48431	other	transcribed_unprocessed_pseudogene	transcribed_unprocessed_pseudogene,processed_transcript	NA	NA	NA
ENSMUSG00000102224	4930447F24Rik	0.00206192	-4.47807	other	processed_transcript	antisense,retained_intron	NA	NA	NA
ENSMUSG00000085585	Gm12223	4.12e-06	-4.34274	other	antisense	antisense	NA	NA	NA
ENSMUSG00000093401	Vmn2r-ps126	0.00238057	-4.2709	other	unprocessed_pseudogene	unprocessed_pseudogene	NA	NA	NA
ENSMUSG00000046840	Hnf4aos	3.94e-05	-4.20256	other	antisense	antisense	NA	NA	NA
ENSMUSG00000110148	RP23-106I21.5	2.34e-09	-4.06135	other	processed_transcript	antisense,retained_intron	NA	NA	NA
ENSMUSG00000097439	Gm16754	1.97e-09	-4.04372	other	antisense	antisense	NA	NA	NA
ENSMUSG00000087346	Gm5699	0.00431669	-3.95712	other	processed_pseudogene	processed_pseudogene	NA	NA	NA
ENSMUSG00000101641	Gm29560	1.4e-08	-3.85407	other	TEC	TEC	NA	NA	NA
ENSMUSG00000083773	Gm13394	0.000101706	-3.7976	other	processed_pseudogene	processed_pseudogene	NA	NA	NA
ENSMUSG00000043192	Gm1840	5.67e-05	-3.74669	other	processed_pseudogene	processed_pseudogene	NA	NA	NA
ENSMUSG00000103189	Gm37092	6.11e-05	-3.73659	other	TEC	TEC	NA	NA	NA
ENSMUSG00000092212	Slc22a13b-ps	3.53e-09	-3.69201	other	polymorphic_pseudogene	polymorphic_pseudogene	NA	NA	NA
ENSMUSG00000087530	Gm15533	1.22e-05	-3.62765	other	antisense	antisense	NA	NA	NA
ENSMUSG00000044062	Plekhd1os	1.03e-05	-3.52573	other	antisense	antisense	NA	NA	NA
ENSMUSG00000102615	Gm37844	6.95e-09	-3.52194	other	TEC	TEC	NA	NA	NA
ENSMUSG00000085890	Tnfsf13os	8.75e-15	-3.48478	other	antisense	antisense	NA	NA	NA
ENSMUSG00000051606	2010001K21Rik	0.00316779	-3.4136	other	pseudogene	pseudogene	NA	NA	NA
ENSMUSG00000056032	BC018473	8.46e-07	-3.40572	other	antisense	antisense	NA	NA	NA
ENSMUSG00000104348	Gm37691	5.01e-05	-3.3867	other	TEC	TEC	NA	NA	NA
ENSMUSG00000099890	Gm28262	0.0015119	-3.26325	other	processed_transcript	lincRNA,TEC	NA	NA	NA
ENSMUSG00000104383	Gm37553	0.00285759	-3.25165	other	TEC	TEC	NA	NA	NA
ENSMUSG00000100593	1700119H24Rik	3.8e-07	-3.22717	other	antisense	antisense	NA	NA	NA
ENSMUSG00000105872	Gm9515	9.54e-08	-3.18271	other	unprocessed_pseudogene	unprocessed_pseudogene	NA	NA	NA
ENSMUSG00000102389	D630023O14Rik	0.000398574	-3.15815	other	TEC	TEC	NA	NA	NA
ENSMUSG00000097979	Gm4691	0.00108721	-3.11135	other	transcribed_processed_pseudogene	transcribed_processed_pseudogene,processed_transcript	NA	NA	NA
ENSMUSG00000066620	Gm4883	0.0022568	-3.08413	other	processed_pseudogene	processed_pseudogene	NA	NA	NA
ENSMUSG00000078182	Gm6083	0.00355201	-3.05718	other	processed_pseudogene	processed_pseudogene	NA	NA	NA
ENSMUSG00000106078	Gm43697	1.08e-22	-3.02063	other	TEC	TEC	NA	NA	NA
ENSMUSG00000069939	Gm12070	3.32e-08	-2.98707	other	processed_pseudogene	processed_pseudogene	NA	NA	NA
ENSMUSG00000075611	Gm11545	1.61e-17	-2.97812	other	unprocessed_pseudogene	unprocessed_pseudogene	NA	NA	NA
ENSMUSG00000089900	Tbc1d22bos	0.000769228	-2.97154	other	antisense	antisense	NA	NA	NA
ENSMUSG00000109644	0610005C13Rik	3.44e-18	-2.96597	other	antisense	antisense	NA	NA	NA
ENSMUSG00000092570	2210019I11Rik	0.0283877	-2.90659	other	antisense	antisense	NA	NA	NA
ENSMUSG00000104798	Gm20121	0.000584447	-2.90067	other	processed_pseudogene	processed_pseudogene	NA	NA	NA
ENSMUSG00000111340	RP24-298N7.10	0.000762347	-2.89429	other	TEC	TEC	NA	NA	NA
ENSMUSG00000085651	Gm11695	8.37e-08	-2.88992	other	antisense	antisense	NA	NA	NA
ENSMUSG00000082424	Gm13292	0.0450893	-2.87489	other	processed_pseudogene	processed_pseudogene	NA	NA	NA
ENSMUSG00000086813	Gm13657	8.78e-06	-2.85657	other	processed_transcript	processed_transcript	NA	NA	NA
ENSMUSG00000087150	BC064078	2.19e-05	-2.83622	other	transcribed_unprocessed_pseudogene	processed_transcript,transcribed_unprocessed_pseudogene	NA	NA	NA
ENSMUSG00000110456	RP23-91H23.4	0.00201038	-2.83007	other	TEC	TEC	NA	NA	NA
ENSMUSG00000094091	Gm21885	5.38e-07	-2.82901	other	unprocessed_pseudogene	unprocessed_pseudogene	NA	NA	NA
ENSMUSG00000085705	Gm16046	1.3e-05	-2.80493	other	processed_transcript	processed_transcript	NA	NA	NA
ENSMUSG00000078370	Gm6316	0.00630469	-2.8033	other	processed_pseudogene	processed_pseudogene	NA	NA	NA
ENSMUSG00000100707	Gm28523	8.16e-07	-2.75216	other	antisense	antisense	NA	NA	NA
ENSMUSG00000108956	Gm45179	5.98e-09	-2.74691	other	TEC	TEC	NA	NA	NA
ENSMUSG00000104136	Gm36955	2.36e-08	-2.70281	other	TEC	TEC	NA	NA	NA
ENSMUSG00000086674	Zfp286os	0.00905442	-2.64948	other	antisense	antisense	NA	NA	NA
ENSMUSG00000073403	Gm10499	2.55e-08	-2.63783	other	transcribed_unprocessed_pseudogene	transcribed_unprocessed_pseudogene,retained_intron	NA	NA	NA
ENSMUSG00000070490	Gm10293	0.00109982	-2.61051	other	processed_pseudogene	processed_pseudogene	NA	NA	NA
ENSMUSG00000102780	Gm38253	0.000118312	-2.59441	other	TEC	TEC	NA	NA	NA
ENSMUSG00000087352	Gm12999	3.62e-06	-2.58245	other	antisense	antisense	NA	NA	NA
ENSMUSG00000087142	Gm12454	8.6e-07	-2.54567	other	antisense	antisense	NA	NA	NA
ENSMUSG00000095042	Gm12537	0.0098964	-2.53271	other	processed_pseudogene	processed_pseudogene	NA	NA	NA
ENSMUSG00000104990	Gm43504	2.75e-07	-2.52457	other	TEC	TEC	NA	NA	NA
ENSMUSG00000086513	9130208D14Rik	1.14e-13	-2.52321	other	unprocessed_pseudogene	unprocessed_pseudogene	NA	NA	NA
ENSMUSG00000091412	Gm2895	0.00198401	-2.52083	other	processed_transcript	processed_transcript	NA	NA	NA
ENSMUSG00000078300	Gm2606	0.000913651	-2.47323	other	processed_pseudogene	processed_pseudogene	NA	NA	NA
ENSMUSG00000104708	Gm42503	0.00433242	-2.47173	other	TEC	TEC	NA	NA	NA
ENSMUSG00000061728	Btnl7-ps	0.00042567	-2.46291	other	unprocessed_pseudogene	unprocessed_pseudogene	NA	NA	NA
ENSMUSG00000111269	RP23-269P7.3	0.000125391	-2.44775	other	processed_pseudogene	processed_pseudogene	NA	NA	NA
ENSMUSG00000081221	Gm14760	0.0156782	-2.44321	other	processed_pseudogene	processed_pseudogene	NA	NA	NA
ENSMUSG00000102047	2010010A06Rik	0.000648155	-2.43645	other	transcribed_processed_pseudogene	processed_transcript,transcribed_processed_pseudogene	NA	NA	NA
ENSMUSG00000102802	Mgam2-ps	6.33e-06	-2.42966	other	transcribed_unprocessed_pseudogene	processed_transcript,transcribed_unprocessed_pseudogene	NA	NA	NA
ENSMUSG00000098113	Gm2445	0.00565295	-2.41908	other	processed_pseudogene	processed_pseudogene	NA	NA	NA
ENSMUSG00000087611	4930458D05Rik	4.12e-12	-2.3708	other	antisense	antisense	NA	NA	NA
ENSMUSG00000085105	Gm12758	5.08e-07	-2.3662	other	antisense	antisense	NA	NA	NA
ENSMUSG00000100183	Gm28512	5.14e-05	-2.3647	other	sense_intronic	sense_intronic	NA	NA	NA
ENSMUSG00000107429	Gm44206	5.35e-06	-2.35816	other	antisense	antisense	NA	NA	NA
ENSMUSG00000085995	Gm2788	2.62e-06	-2.33666	other	processed_transcript	antisense,retained_intron	NA	NA	NA
ENSMUSG00000104563	Gm43041	3.36e-05	-2.31584	other	TEC	TEC	NA	NA	NA
ENSMUSG00000087017	4930417H01Rik	0.0218476	-2.31167	other	processed_transcript	processed_transcript	NA	NA	NA
ENSMUSG00000078586	Gm11735	4.58e-07	-2.27888	other	unprocessed_pseudogene	unprocessed_pseudogene	NA	NA	NA
ENSMUSG00000070574	2310016G11Rik	9.19e-05	-2.27234	other	antisense	antisense	NA	NA	NA
ENSMUSG00000096617	Gm5559	0.0257974	-2.2624	other	processed_pseudogene	processed_pseudogene	NA	NA	NA
ENSMUSG00000102432	Gm29856	0.00681032	-2.25176	other	processed_transcript	processed_transcript	NA	NA	NA
ENSMUSG00000111585	RP23-433H22.2	0.000213833	-2.23456	other	processed_pseudogene	processed_pseudogene	NA	NA	NA
ENSMUSG00000080994	Gm13464	0.0152411	-2.22803	other	processed_pseudogene	processed_pseudogene	NA	NA	NA
ENSMUSG00000006638	Abhd1	0.000495839	-2.19965	other	processed_transcript	processed_transcript,retained_intron	NA	NA	NA
ENSMUSG00000079311	Gm3222	0.0187359	-2.19271	other	processed_pseudogene	processed_pseudogene	NA	NA	NA
ENSMUSG00000098111	Gm4654	0.0392548	-2.16715	other	processed_pseudogene	processed_pseudogene	NA	NA	NA
ENSMUSG00000106574	Gm2451	0.0213629	-2.1533	other	processed_pseudogene	processed_pseudogene	NA	NA	NA
ENSMUSG00000111620	RP24-170A20.7	0.0173004	-2.1508	other	unprocessed_pseudogene	unprocessed_pseudogene	NA	NA	NA
ENSMUSG00000098895	Gm21013	0.0377225	-2.13919	other	processed_pseudogene	processed_pseudogene	NA	NA	NA
ENSMUSG00000078967	Gm3272	0.000212965	-2.11495	other	processed_pseudogene	processed_pseudogene	NA	NA	NA
ENSMUSG00000086384	Banf2os	0.00913137	-2.0938	other	antisense	antisense	NA	NA	NA
ENSMUSG00000096810	Gm10481	0.0168433	-2.08848	other	processed_pseudogene	processed_pseudogene	NA	NA	NA
ENSMUSG00000100153	Gm5601	0.00672283	-2.06774	other	transcribed_processed_pseudogene	processed_transcript,transcribed_processed_pseudogene	NA	NA	NA
ENSMUSG00000093405	Gm20684	0.000341715	-2.06661	other	bidirectional_promoter_lncRNA	bidirectional_promoter_lncRNA	NA	NA	NA
ENSMUSG00000108219	Gm44101	0.00160918	-2.04522	other	TEC	TEC	NA	NA	NA
ENSMUSG00000103484	Gm38000	0.030226	-2.03658	other	TEC	TEC	NA	NA	NA
ENSMUSG00000099478	Gm28370	0.000702653	-2.0323	other	antisense	antisense	NA	NA	NA
ENSMUSG00000086735	Gm13977	0.0335723	-2.03156	other	antisense	antisense	NA	NA	NA
ENSMUSG00000095649	Gm8979	0.000162858	-2.01995	other	unprocessed_pseudogene	unprocessed_pseudogene	NA	NA	NA
ENSMUSG00000098037	Gm7765	0.00715836	-2.01526	other	processed_pseudogene	processed_pseudogene	NA	NA	NA
ENSMUSG00000111015	RP23-99D11.5	0.0390758	-1.98953	other	processed_pseudogene	processed_pseudogene	NA	NA	NA
ENSMUSG00000098019	Gm2546	0.0364505	-1.97876	other	processed_pseudogene	processed_pseudogene	NA	NA	NA
ENSMUSG00000106948	Gm42785	1.92e-07	-1.974	other	processed_pseudogene	processed_pseudogene	NA	NA	NA
ENSMUSG00000103070	Gm37903	0.0422487	-1.9481	other	TEC	TEC	NA	NA	NA
ENSMUSG00000111777	RP23-307B15.5	0.0157181	-1.94377	other	processed_pseudogene	processed_pseudogene	NA	NA	NA
ENSMUSG00000097388	Gm3200	0.0472039	-1.93783	other	processed_pseudogene	processed_pseudogene	NA	NA	NA
ENSMUSG00000087339	Gm11586	0.0113298	-1.93176	other	antisense	antisense	NA	NA	NA
ENSMUSG00000104965	Gm43437	0.0023709	-1.9316	other	TEC	TEC	NA	NA	NA
ENSMUSG00000087060	Eldr	1.52e-06	-1.87852	other	processed_transcript	processed_transcript	NA	NA	NA
ENSMUSG00000109685	RP23-466I14.2	1.34e-05	-1.87777	other	TEC	TEC	NA	NA	NA
ENSMUSG00000098836	Gm27572	0.0021928	-1.8581	other	misc_RNA	misc_RNA	NA	NA	NA
ENSMUSG00000081600	Gm12286	0.0168708	-1.83908	other	processed_pseudogene	processed_pseudogene	NA	NA	NA
ENSMUSG00000074039	4930520O04Rik	0.00892508	-1.79304	other	processed_transcript	processed_transcript	NA	NA	NA
ENSMUSG00000087406	E130215H24Rik	0.0260804	-1.78347	other	processed_transcript	processed_transcript	NA	NA	NA
ENSMUSG00000085629	Gm11697	0.00264622	-1.70739	other	antisense	antisense	NA	NA	NA
ENSMUSG00000086942	Gm15489	0.00215867	-1.69821	other	antisense	antisense	NA	NA	NA
ENSMUSG00000055134	9130017K11Rik	9.77e-09	-1.67788	other	processed_transcript	processed_transcript	NA	NA	NA
ENSMUSG00000059195	Gm12715	0.0155072	-1.67517	other	processed_pseudogene	processed_pseudogene	NA	NA	NA
ENSMUSG00000078965	Gm12033	0.0415368	-1.66841	other	processed_pseudogene	processed_pseudogene	NA	NA	NA
ENSMUSG00000111296	RP23-106F10.1	0.0221399	-1.66705	other	antisense	antisense	NA	NA	NA
ENSMUSG00000101609	Kcnq1ot1	0.00129863	-1.64919	other	antisense	antisense	NA	NA	NA
ENSMUSG00000021566	Slc6a19os	0.0106857	-1.62911	other	antisense	antisense	NA	NA	NA
ENSMUSG00000111619	RP23-319C8.5	2.35e-08	-1.62159	other	processed_pseudogene	processed_pseudogene	NA	NA	NA
ENSMUSG00000103039	Gm37123	0.0118534	-1.6062	other	TEC	TEC	NA	NA	NA
ENSMUSG00000109186	Gm34821	0.00277913	-1.60593	other	antisense	antisense	NA	NA	NA
ENSMUSG00000056904	Gm5620	0.0372779	-1.60347	other	processed_pseudogene	processed_pseudogene	NA	NA	NA
ENSMUSG00000045799	Gm9800	0.0336831	-1.6019	other	pseudogene	pseudogene	NA	NA	NA
ENSMUSG00000085586	Gm11613	0.0449458	-1.58871	other	processed_transcript	processed_transcript	NA	NA	NA
ENSMUSG00000090990	Gm17197	0.000492771	-1.5862	other	antisense	antisense	NA	NA	NA
ENSMUSG00000102759	Gm10463	9.5e-05	-1.58372	other	TEC	TEC	NA	NA	NA
ENSMUSG00000099474	1700097N02Rik	0.000988782	-1.56636	other	antisense	antisense	NA	NA	NA
ENSMUSG00000085761	4930455G09Rik	0.00446408	-1.52384	other	antisense	antisense	NA	NA	NA
ENSMUSG00000086265	Marcksl1-ps4	3.51e-07	-1.52085	other	processed_pseudogene	processed_pseudogene	NA	NA	NA
ENSMUSG00000100776	Gm18254	0.00426371	-1.50584	other	unprocessed_pseudogene	unprocessed_pseudogene	NA	NA	NA
ENSMUSG00000055413	H2-Q5	0.00258675	-1.49775	other	polymorphic_pseudogene	polymorphic_pseudogene,retained_intron,processed_transcript	NA	NA	NA
ENSMUSG00000103527	Gm37261	0.0119749	-1.48604	other	TEC	TEC	NA	NA	NA
ENSMUSG00000089940	Gm4117	1.31e-05	-1.44741	other	processed_transcript	processed_transcript	NA	NA	NA
ENSMUSG00000108124	Gm44146	0.00284973	-1.44422	other	TEC	TEC	NA	NA	NA
ENSMUSG00000105703	Gm43305	4.28e-05	-1.44218	other	TEC	TEC	NA	NA	NA
ENSMUSG00000098090	2700099C18Rik	0.000137397	-1.43409	other	transcribed_unprocessed_pseudogene	processed_transcript,transcribed_unprocessed_pseudogene	NA	NA	NA
ENSMUSG00000087594	BC039771	0.0457384	-1.42653	other	processed_transcript	processed_transcript	NA	NA	NA
ENSMUSG00000093726	Gm20667	0.00100073	-1.42144	other	sense_overlapping	sense_overlapping	NA	NA	NA
ENSMUSG00000099145	Mir8116	0.00565295	-1.3367	other	miRNA	miRNA	NA	NA	NA
ENSMUSG00000104394	Gm37254	9.46e-06	-1.30511	other	TEC	TEC	NA	NA	NA
ENSMUSG00000100632	9430060I03Rik	0.0398802	-1.26543	other	antisense	antisense	NA	NA	NA
ENSMUSG00000087445	Gm14286	0.0305148	-1.2649	other	antisense	antisense	NA	NA	NA
ENSMUSG00000091492	Gm17025	0.00203813	-1.21443	other	antisense	antisense	NA	NA	NA
ENSMUSG00000109196	Gm44715	0.0115058	-1.21376	other	processed_pseudogene	processed_pseudogene	NA	NA	NA
ENSMUSG00000091957	Rps2-ps10	0.0018695	-1.17339	other	transcribed_processed_pseudogene	processed_transcript,transcribed_processed_pseudogene	NA	NA	NA
ENSMUSG00000084938	BB557941	0.0373263	-1.14589	other	processed_transcript	processed_transcript	NA	NA	NA
ENSMUSG00000086119	Gm2415	0.000785092	-1.1421	other	antisense	antisense	NA	NA	NA
ENSMUSG00000086706	Gm15848	0.020408	-1.13546	other	antisense	antisense	NA	NA	NA
ENSMUSG00000073420	Btnl5-ps	0.000324139	-1.1311	other	transcribed_unprocessed_pseudogene	transcribed_unprocessed_pseudogene,processed_transcript	NA	NA	NA
ENSMUSG00000105741	C79130	0.00295151	-1.12342	other	TEC	TEC	NA	NA	NA
ENSMUSG00000085360	Arhgap27os2	0.0018146	-1.12111	other	antisense	antisense	NA	NA	NA
ENSMUSG00000087412	Gm15501	0.0315541	-1.12044	other	transcribed_processed_pseudogene	processed_transcript,transcribed_processed_pseudogene	NA	NA	NA
ENSMUSG00000040323	Gm15429	1.34e-05	-1.10646	other	processed_pseudogene	processed_pseudogene	NA	NA	NA
ENSMUSG00000111436	RP24-286B23.1	0.0282906	-1.10528	other	processed_pseudogene	processed_pseudogene	NA	NA	NA
ENSMUSG00000085574	Gm13053	0.0257943	-1.10097	other	sense_intronic	sense_intronic	NA	NA	NA
ENSMUSG00000087213	2810408I11Rik	0.000300352	-1.09997	other	processed_transcript	antisense,retained_intron	NA	NA	NA
ENSMUSG00000043889	Gm8399	0.00571481	-1.0856	other	pseudogene	pseudogene	NA	NA	NA
ENSMUSG00000097493	9930014A18Rik	0.0035902	-1.0802	other	processed_transcript	antisense,TEC	NA	NA	NA
ENSMUSG00000107761	2010008C14Rik	3.25e-05	-1.0768	other	TEC	TEC	NA	NA	NA
ENSMUSG00000073647	Gm10557	0.0375996	-1.0471	other	pseudogene	pseudogene	NA	NA	NA
ENSMUSG00000102426	RP23-330G24.3	0.0339183	1.00241	other	TEC	TEC	NA	NA	NA
ENSMUSG00000078700	D030028A08Rik	0.00699216	1.00556	other	processed_transcript	processed_transcript	NA	NA	NA
ENSMUSG00000096981	Gm16845	0.0101526	1.03932	other	antisense	antisense	NA	NA	NA
ENSMUSG00000108461	AV356131	0.024079	1.08106	other	bidirectional_promoter_lncRNA	bidirectional_promoter_lncRNA	NA	NA	NA
ENSMUSG00000086914	Gm16124	0.0143124	1.08127	other	antisense	antisense	NA	NA	NA
ENSMUSG00000085227	6330418K02Rik	0.0178928	1.10898	other	antisense	antisense	NA	NA	NA
ENSMUSG00000075389	2810410L24Rik	0.000932256	1.11364	other	processed_transcript	processed_transcript	NA	NA	NA
ENSMUSG00000107134	Gm42528	0.0187948	1.12359	other	TEC	TEC	NA	NA	NA
ENSMUSG00000105692	Gm43737	1.98e-05	1.13182	other	TEC	TEC	NA	NA	NA
ENSMUSG00000029386	Tctn2	1.19e-05	1.14296	other	processed_transcript	processed_transcript,retained_intron	NA	NA	NA
ENSMUSG00000100017	2410022M11Rik	0.0155364	1.16391	other	antisense	antisense	NA	NA	NA
ENSMUSG00000052005	Gm9864	0.0269112	1.16851	other	pseudogene	pseudogene	NA	NA	NA
ENSMUSG00000085704	4921531C22Rik	0.0127506	1.21375	other	processed_transcript	processed_transcript	NA	NA	NA
ENSMUSG00000087627	A230059L01Rik	0.0061085	1.21934	other	processed_transcript	antisense,TEC	NA	NA	NA
ENSMUSG00000043993	2900052L18Rik	0.0451815	1.22101	other	processed_transcript	processed_transcript	NA	NA	NA
ENSMUSG00000085037	4933421O10Rik	0.0056224	1.23286	other	processed_transcript	processed_transcript	NA	NA	NA
ENSMUSG00000097048	1600020E01Rik	0.00160327	1.26525	other	antisense	antisense	NA	NA	NA
ENSMUSG00000109147	4930431P19Rik	0.0159064	1.26671	other	transcribed_processed_pseudogene	processed_transcript,transcribed_processed_pseudogene	NA	NA	NA
ENSMUSG00000106928	Gm43860	0.000602952	1.28342	other	TEC	TEC	NA	NA	NA
ENSMUSG00000074912	Gm14207	0.0143022	1.28896	other	processed_transcript	processed_transcript	NA	NA	NA
ENSMUSG00000087476	Rap1gapos	0.00656623	1.29259	other	antisense	antisense	NA	NA	NA
ENSMUSG00000087047	1700110K17Rik	0.0332886	1.30463	other	antisense	antisense	NA	NA	NA
ENSMUSG00000084771	A230072E10Rik	0.0314572	1.30603	other	antisense	antisense	NA	NA	NA
ENSMUSG00000053358	Gm9905	0.0190902	1.3085	other	TEC	TEC	NA	NA	NA
ENSMUSG00000101462	Gm3052	0.0391765	1.31591	other	transcribed_processed_pseudogene	transcribed_processed_pseudogene,processed_transcript	NA	NA	NA
ENSMUSG00000062470	Fbxl12os	0.0324345	1.3279	other	antisense	antisense	NA	NA	NA
ENSMUSG00000101013	A630072M18Rik	0.00820919	1.32836	other	antisense	antisense	NA	NA	NA
ENSMUSG00000052291	5330438D12Rik	0.0149375	1.35248	other	pseudogene	pseudogene	NA	NA	NA
ENSMUSG00000072660	Gm6288	0.0493529	1.36038	other	antisense	antisense	NA	NA	NA
ENSMUSG00000111334	RP23-104D6.8	0.0201337	1.36636	other	processed_transcript	lincRNA,retained_intron	NA	NA	NA
ENSMUSG00000107511	Gm44440	0.000361369	1.37208	other	TEC	TEC	NA	NA	NA
ENSMUSG00000106025	Gm42940	0.0317852	1.40505	other	TEC	TEC	NA	NA	NA
ENSMUSG00000082286	Pisd-ps1	0.00440106	1.41486	other	transcribed_unprocessed_pseudogene	processed_transcript,transcribed_unprocessed_pseudogene	NA	NA	NA
ENSMUSG00000097167	Gm16740	0.00547445	1.45846	other	antisense	antisense	NA	NA	NA
ENSMUSG00000022915	1700093J21Rik	0.00357678	1.46995	other	antisense	antisense	NA	NA	NA
ENSMUSG00000097124	A530020G20Rik	0.00211489	1.484	other	antisense	antisense	NA	NA	NA
ENSMUSG00000106116	Gm18830	0.0432621	1.49409	other	processed_pseudogene	processed_pseudogene	NA	NA	NA
ENSMUSG00000106205	C230096K16Rik	0.0160158	1.49439	other	TEC	TEC	NA	NA	NA
ENSMUSG00000092183	4930515G01Rik	0.00897343	1.49932	other	antisense	antisense	NA	NA	NA
ENSMUSG00000086448	9330162012Rik	0.000126064	1.53583	other	processed_transcript	processed_transcript	NA	NA	NA
ENSMUSG00000083674	Zfp133-ps	0.048943	1.54334	other	unitary_pseudogene	processed_transcript,unitary_pseudogene	NA	NA	NA
ENSMUSG00000102278	Gm37145	0.000351507	1.54762	other	TEC	TEC	NA	NA	NA
ENSMUSG00000086447	Gm13522	0.0304252	1.55206	other	antisense	antisense	NA	NA	NA
ENSMUSG00000091050	9330020H09Rik	3.75e-05	1.56106	other	antisense	antisense	NA	NA	NA
ENSMUSG00000101304	Plet1os	0.00849565	1.5891	other	antisense	antisense	NA	NA	NA
ENSMUSG00000110716	RP24-94F12.4	0.00200364	1.61184	other	bidirectional_promoter_lncRNA	bidirectional_promoter_lncRNA	NA	NA	NA
ENSMUSG00000086390	1810019D21Rik	1.29e-12	1.61256	other	processed_transcript	processed_transcript	NA	NA	NA
ENSMUSG00000084910	C630043F03Rik	1.76e-11	1.6157	other	processed_transcript	processed_transcript	NA	NA	NA
ENSMUSG00000110685	RP24-238M4.4	0.0424245	1.61823	other	transcribed_unprocessed_pseudogene	processed_transcript,transcribed_unprocessed_pseudogene	NA	NA	NA
ENSMUSG00000074136	4930513N10Rik	0.0214336	1.67555	other	antisense	antisense	NA	NA	NA
ENSMUSG00000074052	BC048644	0.0111938	1.67626	other	bidirectional_promoter_lncRNA	bidirectional_promoter_lncRNA	NA	NA	NA
ENSMUSG00000093720	Gm20635	0.0211801	1.67717	other	antisense	antisense	NA	NA	NA
ENSMUSG00000074436	Defa-ps18	0.0262928	1.69447	other	unprocessed_pseudogene	unprocessed_pseudogene	NA	NA	NA
ENSMUSG00000111176	RP23-128A23.3	0.0197483	1.69481	other	TEC	TEC	NA	NA	NA
ENSMUSG00000086468	Etaa1os	0.0244268	1.71233	other	antisense	antisense	NA	NA	NA
ENSMUSG00000087433	Gm14167	0.0138001	1.72159	other	antisense	antisense	NA	NA	NA
ENSMUSG00000093622	Gm20703	0.00788327	1.73008	other	antisense	antisense	NA	NA	NA
ENSMUSG00000110156	Gm45248	0.000103285	1.7314	other	antisense	antisense	NA	NA	NA
ENSMUSG00000085355	3010003L21Rik	0.0156956	1.75315	other	antisense	antisense	NA	NA	NA
ENSMUSG00000108105	Gm5340	0.0176961	1.75842	other	processed_pseudogene	processed_pseudogene	NA	NA	NA
ENSMUSG00000079224	Gm6565	0.0375511	1.76457	other	processed_pseudogene	processed_pseudogene	NA	NA	NA
ENSMUSG00000107994	D830050J10Rik	0.0450958	1.80453	other	bidirectional_promoter_lncRNA	bidirectional_promoter_lncRNA	NA	NA	NA
ENSMUSG00000106978	N4bp2os	0.000495435	1.81035	other	processed_transcript	antisense,retained_intron	NA	NA	NA
ENSMUSG00000097892	Gm26801	8.93e-05	1.81611	other	antisense	antisense	NA	NA	NA
ENSMUSG00000107019	Gm43682	0.00726047	1.81979	other	TEC	TEC	NA	NA	NA
ENSMUSG00000085972	1110028F11Rik	0.00277162	1.84172	other	sense_intronic	sense_intronic	NA	NA	NA
ENSMUSG00000097276	4930525G20Rik	0.000430296	1.892	other	antisense	antisense	NA	NA	NA
ENSMUSG00000109209	Gm45104	0.0243662	1.91321	other	TEC	TEC	NA	NA	NA
ENSMUSG00000098702	1500015A07Rik	4.37e-08	1.92834	other	antisense	antisense	NA	NA	NA
ENSMUSG00000102152	Gm37475	0.0468499	1.96677	other	TEC	TEC	NA	NA	NA
ENSMUSG00000087326	Gm12503	0.031812	1.96976	other	processed_transcript	processed_transcript	NA	NA	NA
ENSMUSG00000109780	Gm45447	5.76e-06	1.99503	other	antisense	antisense	NA	NA	NA
ENSMUSG00000109698	Gm45469	0.00529939	2.03165	other	bidirectional_promoter_lncRNA	bidirectional_promoter_lncRNA	NA	NA	NA
ENSMUSG00000065126	Snord104	4.59e-07	2.05047	other	snoRNA	snoRNA	NA	NA	NA
ENSMUSG00000087541	Hopxos	0.00392106	2.0606	other	antisense	antisense	NA	NA	NA
ENSMUSG00000056411	Gm12500	0.00291482	2.06274	other	antisense	antisense	NA	NA	NA
ENSMUSG00000109899	Gm6012	0.0101701	2.0692	other	processed_pseudogene	processed_pseudogene	NA	NA	NA
ENSMUSG00000099632	2900093K20Rik	3.76e-05	2.07167	other	antisense	antisense	NA	NA	NA
ENSMUSG00000103625	Gm37357	0.0420555	2.09034	other	TEC	TEC	NA	NA	NA
ENSMUSG00000110630	RP24-178J22.1	0.044644	2.09211	other	antisense	antisense	NA	NA	NA
ENSMUSG00000097145	9230114K14Rik	0.000438209	2.10109	other	processed_transcript	lincRNA,retained_intron	NA	NA	NA
ENSMUSG00000097814	Panct2	0.0418929	2.11979	other	antisense	antisense	NA	NA	NA
ENSMUSG00000108218	Olfr1372-ps1	0.000225902	2.14095	other	transcribed_unprocessed_pseudogene	processed_transcript,transcribed_unprocessed_pseudogene	NA	NA	NA
ENSMUSG00000085830	Grin1os	6.64e-09	2.1532	other	antisense	antisense	NA	NA	NA
ENSMUSG00000089975	Gm7420	0.000245773	2.16144	other	transcribed_processed_pseudogene	transcribed_processed_pseudogene	NA	NA	NA
ENSMUSG00000052125	F730043M19Rik	0.0255957	2.1755	other	processed_transcript	processed_transcript	NA	NA	NA
ENSMUSG00000085873	Ttc39aos1	2.1e-09	2.17843	other	antisense	antisense	NA	NA	NA
ENSMUSG00000071265	1700086L19Rik	0.000180045	2.18079	other	transcribed_unitary_pseudogene	transcribed_unitary_pseudogene,processed_transcript	NA	NA	NA
ENSMUSG00000085081	Rptoros	5.52e-07	2.24041	other	antisense	antisense	NA	NA	NA
ENSMUSG00000051074	4930579K19Rik	0.000121245	2.24898	other	processed_transcript	lincRNA,TEC,processed_transcript	NA	NA	NA
ENSMUSG00000089769	Gm16574	0.00170525	2.31069	other	processed_pseudogene	processed_pseudogene	NA	NA	NA
ENSMUSG00000054304	D130007C19Rik	0.0104053	2.32476	other	pseudogene	pseudogene	NA	NA	NA
ENSMUSG00000085636	Gm11769	0.00966808	2.33313	other	processed_transcript	processed_transcript	NA	NA	NA
ENSMUSG00000087593	Gm16174	0.0432568	2.37416	other	antisense	antisense	NA	NA	NA
ENSMUSG00000106209	Gm42918	0.014928	2.40759	other	antisense	antisense	NA	NA	NA
ENSMUSG00000111713	RP23-392I13.15	0.00103492	2.42589	other	antisense	antisense	NA	NA	NA
ENSMUSG00000054909	Wbscr25	0.00350971	2.44329	other	antisense	antisense	NA	NA	NA
ENSMUSG00000086923	4930406D18Rik	0.0418904	2.50926	other	processed_transcript	retained_intron,lincRNA	NA	NA	NA
ENSMUSG00000085696	Hoxaas3	8.76e-05	2.56563	other	antisense	antisense	NA	NA	NA
ENSMUSG00000070392	Gm20634	1.37e-12	2.59585	other	processed_transcript	processed_transcript	NA	NA	NA
ENSMUSG00000056061	Gata5os	0.000502702	2.61488	other	antisense	antisense	NA	NA	NA
ENSMUSG00000072809	9330160F10Rik	0.000399089	2.61605	other	antisense	antisense	NA	NA	NA
ENSMUSG00000110557	RP23-403G9.9	1.21e-08	2.62561	other	transcribed_unprocessed_pseudogene	transcribed_unprocessed_pseudogene,processed_transcript	NA	NA	NA
ENSMUSG00000106847	Peg13	2.23e-42	2.63998	other	sense_intronic	sense_intronic	NA	NA	NA
ENSMUSG00000053442	4930597O21Rik	0.020713	2.66436	other	processed_transcript	retained_intron,bidirectional_promoter_lncRNA	NA	NA	NA
ENSMUSG00000086434	Gm15200	8.73e-08	2.69563	other	antisense	antisense	NA	NA	NA
ENSMUSG00000081303	Gm16011	4.24e-10	2.76602	other	processed_pseudogene	processed_pseudogene	NA	NA	NA
ENSMUSG00000105509	C130013H08Rik	0.00359761	2.78053	other	antisense	antisense	NA	NA	NA
ENSMUSG00000106224	Gm43823	0.00391916	2.80374	other	TEC	TEC	NA	NA	NA
ENSMUSG00000085057	Gm13415	2.77e-05	2.89138	other	processed_transcript	antisense,retained_intron	NA	NA	NA
ENSMUSG00000102059	Gm20257	2.21e-05	2.9698	other	transcribed_unprocessed_pseudogene	processed_transcript,transcribed_unprocessed_pseudogene	NA	NA	NA
ENSMUSG00000064043	Trerf1	9.97e-05	2.97574	other	processed_transcript	retained_intron,processed_transcript	NA	NA	NA
ENSMUSG00000102184	Gm37192	9.52e-06	3.00302	other	TEC	TEC	NA	NA	NA
ENSMUSG00000106825	2510016D11Rik	5.73e-07	3.07443	other	TEC	TEC	NA	NA	NA
ENSMUSG00000109956	Gm45428	0.000381696	3.08844	other	TEC	TEC	NA	NA	NA
ENSMUSG00000108688	Gm44985	1.66e-22	3.23767	other	TEC	TEC	NA	NA	NA
ENSMUSG00000092500	Gm20400	0.000104591	3.25339	other	antisense	antisense	NA	NA	NA
ENSMUSG00000085945	2310014F06Rik	5.68e-06	3.29374	other	bidirectional_promoter_lncRNA	bidirectional_promoter_lncRNA	NA	NA	NA
ENSMUSG00000079499	6530402F18Rik	7.32e-06	3.36064	other	processed_transcript	processed_transcript	NA	NA	NA
ENSMUSG00000092071	A230065N10Rik	0.00374339	3.41579	other	antisense	antisense	NA	NA	NA
ENSMUSG00000097730	Gm26588	4.91e-06	3.52372	other	antisense	antisense	NA	NA	NA
ENSMUSG00000099519	Gm29253	0.00742004	3.86355	other	processed_transcript	processed_transcript	NA	NA	NA
ENSMUSG00000103529	A730089K16Rik	8.53e-09	3.88288	other	TEC	TEC	NA	NA	NA
ENSMUSG00000108435	Gm45051	0.0070994	3.90734	other	antisense	antisense	NA	NA	NA
ENSMUSG00000086029	Pax6os1	0.000250987	4.683	other	antisense	antisense	NA	NA	NA
ENSMUSG00000101939	Gm28438	0.0188975	9.12034	other	unprocessed_pseudogene	unprocessed_pseudogene	NA	NA	NA
MSTRG.18465	MSTRG.18465	2.39e-16	-6.17882	potential_novel_lncRNA	NA	NA	antisense	antisense	i
MSTRG.22874	MSTRG.22874	1.67e-12	-5.34582	potential_novel_lncRNA	NA	NA	antisense	antisense	i
MSTRG.12411	MSTRG.12411	2.52e-16	-5.30893	potential_novel_lncRNA	NA	NA	intergenic	intergenic	u
MSTRG.16696	MSTRG.16696	1.04e-10	-5.28176	potential_novel_lncRNA	NA	NA	antisense	antisense	x,i
MSTRG.15131	MSTRG.15131	2.49e-08	-5.23663	potential_novel_lncRNA	NA	NA	intergenic	intergenic	u
MSTRG.26808	MSTRG.26808	1.16e-10	-5.06082	potential_novel_lncRNA	NA	NA	intergenic	intergenic	u
MSTRG.21493	MSTRG.21493	1.94e-12	-5.00558	potential_novel_lncRNA	NA	NA	intergenic	intergenic	u
MSTRG.18534	MSTRG.18534	4.3e-08	-4.98669	potential_novel_lncRNA	NA	NA	antisense	antisense	x
MSTRG.45788	MSTRG.45788	2.99e-15	-4.80057	potential_novel_lncRNA	NA	NA	intergenic	intergenic	u
MSTRG.3601	MSTRG.3601	7.28e-08	-4.77892	potential_novel_lncRNA	NA	NA	intergenic	intergenic	u
MSTRG.4886	MSTRG.4886	1.72e-07	-4.73815	potential_novel_lncRNA	NA	NA	intergenic	intergenic	u
MSTRG.20304	MSTRG.20304	7.36e-12	-4.71135	potential_novel_lncRNA	NA	NA	intergenic	intergenic	u
MSTRG.44632	MSTRG.44632	7.17e-12	-4.68521	potential_novel_lncRNA	NA	NA	intergenic	intergenic	u
MSTRG.10442	MSTRG.10442	2.62e-10	-4.53302	potential_novel_lncRNA	NA	NA	intergenic	intergenic	u
MSTRG.44843	MSTRG.44843	2.66e-06	-4.48481	potential_novel_lncRNA	NA	NA	antisense	antisense	x
MSTRG.7886	MSTRG.7886	1.82e-07	-4.42342	potential_novel_lncRNA	NA	NA	intergenic	intergenic	u
MSTRG.19242	MSTRG.19242	1.33e-06	-4.39348	potential_novel_lncRNA	NA	NA	intergenic	intergenic	u
MSTRG.22565	MSTRG.22565	6.31e-06	-4.32879	potential_novel_lncRNA	NA	NA	intergenic	intergenic	u
MSTRG.31873	MSTRG.31873	5.66e-10	-4.31127	potential_novel_lncRNA	NA	NA	antisense	antisense	i
MSTRG.21060	MSTRG.21060	2.86e-08	-4.23737	potential_novel_lncRNA	NA	NA	intergenic	intergenic	u
MSTRG.34770	MSTRG.34770	7.61e-10	-4.23463	potential_novel_lncRNA	NA	NA	intergenic	intergenic	u
MSTRG.27442	MSTRG.27442	3.08e-05	-4.22176	potential_novel_lncRNA	NA	NA	intergenic	intergenic	u
MSTRG.33495	MSTRG.33495	1.28e-05	-4.16688	potential_novel_lncRNA	NA	NA	intergenic	intergenic	u
MSTRG.40395	MSTRG.40395	3.12e-07	-4.06587	potential_novel_lncRNA	NA	NA	intergenic	intergenic	u
MSTRG.34114	MSTRG.34114	0.0020033	-4.05915	potential_novel_lncRNA	NA	NA	antisense	antisense	x
MSTRG.12081	MSTRG.12081	3.63e-07	-4.0276	potential_novel_lncRNA	NA	NA	intergenic	intergenic	u
MSTRG.10967	MSTRG.10967	2e-06	-3.98385	potential_novel_lncRNA	NA	NA	intergenic	intergenic	u
MSTRG.12702	MSTRG.12702	4.6e-06	-3.93779	potential_novel_lncRNA	NA	NA	intergenic	intergenic	u
MSTRG.22913	MSTRG.22913	0.00157485	-3.92588	potential_novel_lncRNA	NA	NA	antisense	antisense	x
MSTRG.34200	MSTRG.34200	3.3e-05	-3.89813	potential_novel_lncRNA	NA	NA	intergenic	intergenic	u
MSTRG.10063	MSTRG.10063	1.64e-06	-3.89063	potential_novel_lncRNA	NA	NA	intergenic	intergenic	u
MSTRG.17739	MSTRG.17739	6.16e-07	-3.86354	potential_novel_lncRNA	NA	NA	antisense	antisense	i
MSTRG.30156	MSTRG.30156	1.17e-06	-3.8319	potential_novel_lncRNA	NA	NA	intergenic	intergenic	u
MSTRG.10855	MSTRG.10855	0.00157374	-3.79837	potential_novel_lncRNA	NA	NA	intergenic	intergenic	u
MSTRG.39499	MSTRG.39499	4.6e-05	-3.72587	potential_novel_lncRNA	NA	NA	antisense	antisense	x
MSTRG.20449	MSTRG.20449	4.82e-10	-3.68455	potential_novel_lncRNA	NA	NA	antisense	antisense	i
MSTRG.12425	MSTRG.12425	2.19e-08	-3.67474	potential_novel_lncRNA	NA	NA	intergenic	intergenic	u
MSTRG.15683	MSTRG.15683	8.75e-05	-3.67348	potential_novel_lncRNA	NA	NA	intergenic	intergenic	u
MSTRG.16818	MSTRG.16818	0.00335502	-3.60894	potential_novel_lncRNA	NA	NA	intergenic	intergenic	u
MSTRG.25087	MSTRG.25087	0.00166799	-3.57232	potential_novel_lncRNA	NA	NA	intergenic	intergenic	u
MSTRG.15899	MSTRG.15899	8.62e-08	-3.56009	potential_novel_lncRNA	NA	NA	intergenic	intergenic	u
MSTRG.22265	MSTRG.22265	0.000159618	-3.52199	potential_novel_lncRNA	NA	NA	antisense	antisense	x
MSTRG.47702	MSTRG.47702	7.29e-13	-3.48953	potential_novel_lncRNA	NA	NA	intergenic	intergenic	u
MSTRG.25269	MSTRG.25269	8.99e-07	-3.47433	potential_novel_lncRNA	NA	NA	intergenic	intergenic	u
MSTRG.10445	MSTRG.10445	3.83e-05	-3.45112	potential_novel_lncRNA	NA	NA	intergenic	intergenic	u
MSTRG.9336	MSTRG.9336	1.5e-14	-3.41411	potential_novel_lncRNA	NA	NA	intergenic	intergenic	u
MSTRG.33090	MSTRG.33090	0.0154177	-3.40411	potential_novel_lncRNA	NA	NA	antisense	antisense	i
MSTRG.34771	MSTRG.34771	2.59e-10	-3.36887	potential_novel_lncRNA	NA	NA	antisense	antisense	x
MSTRG.12085	MSTRG.12085	3.91e-10	-3.35481	potential_novel_lncRNA	NA	NA	antisense	antisense	i
MSTRG.29423	MSTRG.29423	0.00361031	-3.34413	potential_novel_lncRNA	NA	NA	antisense	antisense	x
MSTRG.44008	MSTRG.44008	8.58e-05	-3.32579	potential_novel_lncRNA	NA	NA	intergenic	intergenic	u
MSTRG.26902	MSTRG.26902	3.05e-06	-3.31989	potential_novel_lncRNA	NA	NA	intergenic	intergenic	u
MSTRG.34596	MSTRG.34596	3.26e-05	-3.30292	potential_novel_lncRNA	NA	NA	intergenic	intergenic	u
MSTRG.1655	MSTRG.1655	1.91e-05	-3.27342	potential_novel_lncRNA	NA	NA	antisense	antisense	x
MSTRG.45795	MSTRG.45795	0.000724162	-3.26464	potential_novel_lncRNA	NA	NA	intergenic	intergenic	u
MSTRG.33432	MSTRG.33432	2.27e-06	-3.26232	potential_novel_lncRNA	NA	NA	intergenic	intergenic	u
MSTRG.26903	MSTRG.26903	0.00071325	-3.24953	potential_novel_lncRNA	NA	NA	intergenic	intergenic	u
MSTRG.28634	MSTRG.28634	0.000655881	-3.24418	potential_novel_lncRNA	NA	NA	intergenic	intergenic	u
MSTRG.12075	MSTRG.12075	3.1e-07	-3.21996	potential_novel_lncRNA	NA	NA	intergenic	intergenic	u
MSTRG.50705	MSTRG.50705	0.000288882	-3.14618	potential_novel_lncRNA	NA	NA	intergenic	intergenic	u
MSTRG.47612	MSTRG.47612	0.00139243	-3.14241	potential_novel_lncRNA	NA	NA	antisense	antisense	i
MSTRG.26905	MSTRG.26905	2.17e-06	-3.10767	potential_novel_lncRNA	NA	NA	intergenic	intergenic	u
MSTRG.22785	MSTRG.22785	0.0396296	-3.08565	potential_novel_lncRNA	NA	NA	antisense	antisense	i
MSTRG.10383	MSTRG.10383	0.00100956	-3.07056	potential_novel_lncRNA	NA	NA	intergenic	intergenic	u
MSTRG.9623	MSTRG.9623	0.00108598	-3.05194	potential_novel_lncRNA	NA	NA	intergenic	intergenic	u
MSTRG.33177	MSTRG.33177	8.43e-07	-3.0476	potential_novel_lncRNA	NA	NA	antisense	antisense	x
MSTRG.49787	MSTRG.49787	0.000245773	-3.04393	potential_novel_lncRNA	NA	NA	intergenic	intergenic	u
MSTRG.50732	MSTRG.50732	0.000963215	-3.0391	potential_novel_lncRNA	NA	NA	intergenic	intergenic	u
MSTRG.39340	MSTRG.39340	2.82e-05	-3.02042	potential_novel_lncRNA	NA	NA	intergenic	intergenic	u
MSTRG.15898	MSTRG.15898	0.001081	-2.99558	potential_novel_lncRNA	NA	NA	intergenic	intergenic	u
MSTRG.22769	MSTRG.22769	0.000104945	-2.99048	potential_novel_lncRNA	NA	NA	antisense	antisense	x
MSTRG.22868	MSTRG.22868	5.73e-06	-2.9799	potential_novel_lncRNA	NA	NA	intergenic	intergenic	u
MSTRG.15845	MSTRG.15845	1.66e-12	-2.97799	potential_novel_lncRNA	NA	NA	intergenic	intergenic	u
MSTRG.7422	MSTRG.7422	0.00111194	-2.96632	potential_novel_lncRNA	NA	NA	antisense	antisense	i
MSTRG.15919	MSTRG.15919	2.66e-06	-2.95396	potential_novel_lncRNA	NA	NA	intergenic	intergenic	u
MSTRG.25642	MSTRG.25642	0.00430822	-2.8907	potential_novel_lncRNA	NA	NA	antisense	antisense	x
MSTRG.22286	MSTRG.22286	0.00188447	-2.87552	potential_novel_lncRNA	NA	NA	intergenic	intergenic	u
MSTRG.15864	MSTRG.15864	0.00012593	-2.86461	potential_novel_lncRNA	NA	NA	antisense	antisense,intergenic	x,u
MSTRG.8860	MSTRG.8860	0.00345321	-2.84374	potential_novel_lncRNA	NA	NA	antisense	antisense	x
MSTRG.26906	MSTRG.26906	9.54e-05	-2.8319	potential_novel_lncRNA	NA	NA	intergenic	intergenic	u
MSTRG.45318	MSTRG.45318	0.0261233	-2.82248	potential_novel_lncRNA	NA	NA	intergenic	intergenic	u
MSTRG.10096	MSTRG.10096	0.00157485	-2.8223	potential_novel_lncRNA	NA	NA	intergenic	intergenic	u
MSTRG.6279	MSTRG.6279	6.09e-13	-2.72934	potential_novel_lncRNA	NA	NA	intergenic	intergenic	u
MSTRG.22018	MSTRG.22018	0.000100778	-2.71839	potential_novel_lncRNA	NA	NA	antisense	antisense	x
MSTRG.48144	MSTRG.48144	0.00265231	-2.71643	potential_novel_lncRNA	NA	NA	intergenic	intergenic	u
MSTRG.21489	MSTRG.21489	0.000163232	-2.71388	potential_novel_lncRNA	NA	NA	antisense	antisense	x
MSTRG.25639	MSTRG.25639	5.82e-07	-2.69453	potential_novel_lncRNA	NA	NA	intergenic	intergenic	o
MSTRG.16547	MSTRG.16547	0.00747461	-2.6604	potential_novel_lncRNA	NA	NA	intergenic	intergenic	u
MSTRG.16673	MSTRG.16673	0.0125525	-2.52431	potential_novel_lncRNA	NA	NA	intergenic	intergenic	u
MSTRG.9601	MSTRG.9601	0.0122089	-2.52166	potential_novel_lncRNA	NA	NA	intergenic	intergenic	u
MSTRG.25159	MSTRG.25159	0.0287406	-2.50567	potential_novel_lncRNA	NA	NA	antisense	antisense	i
MSTRG.15025	MSTRG.15025	0.000552327	-2.49123	potential_novel_lncRNA	NA	NA	intergenic	intergenic	u
MSTRG.13262	MSTRG.13262	0.00665473	-2.48423	potential_novel_lncRNA	NA	NA	antisense	antisense	i,x
MSTRG.13263	MSTRG.13263	0.00360606	-2.45165	potential_novel_lncRNA	NA	NA	antisense	antisense	x
MSTRG.16675	MSTRG.16675	4.43e-10	-2.41283	potential_novel_lncRNA	NA	NA	intergenic	intergenic	u
MSTRG.48226	MSTRG.48226	0.00213559	-2.3993	potential_novel_lncRNA	NA	NA	antisense	antisense	x
MSTRG.26847	MSTRG.26847	5.28e-06	-2.36242	potential_novel_lncRNA	NA	NA	antisense	antisense	i
MSTRG.16482	MSTRG.16482	0.00040243	-2.35625	potential_novel_lncRNA	NA	NA	antisense	antisense	x,i
MSTRG.44389	MSTRG.44389	0.000495435	-2.35442	potential_novel_lncRNA	NA	NA	intergenic	intergenic	u
MSTRG.44129	MSTRG.44129	0.0109194	-2.35434	potential_novel_lncRNA	NA	NA	antisense	antisense	i
MSTRG.21204	MSTRG.21204	1.11e-05	-2.30241	potential_novel_lncRNA	NA	NA	antisense	antisense	i
MSTRG.17780	MSTRG.17780	0.00888433	-2.30077	potential_novel_lncRNA	NA	NA	antisense	antisense	i
MSTRG.20905	MSTRG.20905	0.0230401	-2.28521	potential_novel_lncRNA	NA	NA	intergenic	intergenic	u
MSTRG.16665	MSTRG.16665	0.0037798	-2.25335	potential_novel_lncRNA	NA	NA	antisense	antisense	i
MSTRG.33460	MSTRG.33460	0.00644822	-2.24153	potential_novel_lncRNA	NA	NA	intergenic	intergenic	u
MSTRG.34636	MSTRG.34636	0.0250071	-2.22329	potential_novel_lncRNA	NA	NA	intergenic	intergenic	u
MSTRG.21889	MSTRG.21889	0.000110953	-2.21337	potential_novel_lncRNA	NA	NA	antisense	antisense	i
MSTRG.15686	MSTRG.15686	0.000812621	-2.2081	potential_novel_lncRNA	NA	NA	intergenic	intergenic	u
MSTRG.20402	MSTRG.20402	0.00364335	-2.20628	potential_novel_lncRNA	NA	NA	intergenic	intergenic	u
MSTRG.45007	MSTRG.45007	0.0337262	-2.17166	potential_novel_lncRNA	NA	NA	antisense	antisense	x
MSTRG.45129	MSTRG.45129	4.9e-09	-2.15123	potential_novel_lncRNA	NA	NA	intergenic	intergenic	u
MSTRG.21049	MSTRG.21049	0.0243324	-2.14455	potential_novel_lncRNA	NA	NA	intergenic	intergenic	u
MSTRG.22886	MSTRG.22886	3.13e-06	-2.13925	potential_novel_lncRNA	NA	NA	antisense	antisense	x
MSTRG.19794	MSTRG.19794	0.00249732	-2.10604	potential_novel_lncRNA	NA	NA	intergenic	intergenic	u
MSTRG.42726	MSTRG.42726	0.0408541	-2.09757	potential_novel_lncRNA	NA	NA	antisense	antisense	i
MSTRG.28447	MSTRG.28447	0.0127458	-2.09361	potential_novel_lncRNA	NA	NA	antisense	antisense	i
MSTRG.34112	MSTRG.34112	0.0010519	-2.07979	potential_novel_lncRNA	NA	NA	antisense	antisense	x
MSTRG.12083	MSTRG.12083	0.0461438	-2.05852	potential_novel_lncRNA	NA	NA	intergenic	intergenic	u
MSTRG.28939	MSTRG.28939	8.32e-17	-1.97976	potential_novel_lncRNA	NA	NA	antisense	antisense	i
MSTRG.8439	MSTRG.8439	0.0119024	-1.94207	potential_novel_lncRNA	NA	NA	antisense	antisense	o
MSTRG.23774	MSTRG.23774	4.77e-05	-1.9372	potential_novel_lncRNA	NA	NA	intergenic	intergenic	u
MSTRG.26149	MSTRG.26149	1.18e-07	-1.93299	potential_novel_lncRNA	NA	NA	intergenic	intergenic	u
MSTRG.33608	MSTRG.33608	0.0029295	-1.91826	potential_novel_lncRNA	NA	NA	intergenic	intergenic	u
MSTRG.19793	MSTRG.19793	0.0220931	-1.91783	potential_novel_lncRNA	NA	NA	intergenic	intergenic	u
MSTRG.47940	MSTRG.47940	0.0307312	-1.91025	potential_novel_lncRNA	NA	NA	antisense	antisense	i
MSTRG.19878	MSTRG.19878	0.0180743	-1.90533	potential_novel_lncRNA	NA	NA	intergenic	intergenic	u
MSTRG.20669	MSTRG.20669	0.000203229	-1.9043	potential_novel_lncRNA	NA	NA	antisense	antisense	i
MSTRG.28938	MSTRG.28938	1.79e-06	-1.90362	potential_novel_lncRNA	NA	NA	antisense	antisense	i
MSTRG.17521	MSTRG.17521	0.0020604	-1.87911	potential_novel_lncRNA	NA	NA	intergenic	intergenic	u
MSTRG.15063	MSTRG.15063	0.04062	-1.84617	potential_novel_lncRNA	NA	NA	intergenic	intergenic	u
MSTRG.16135	MSTRG.16135	0.0299286	-1.84265	potential_novel_lncRNA	NA	NA	antisense	antisense	x
MSTRG.31595	MSTRG.31595	1.04e-05	-1.83019	potential_novel_lncRNA	NA	NA	antisense	antisense	i
MSTRG.51264	MSTRG.51264	4.05e-05	-1.82689	potential_novel_lncRNA	NA	NA	intergenic	intergenic	u
MSTRG.12196	MSTRG.12196	0.015197	-1.77103	potential_novel_lncRNA	NA	NA	antisense	antisense	i
MSTRG.33596	MSTRG.33596	0.0333641	-1.77025	potential_novel_lncRNA	NA	NA	intergenic	intergenic	u
MSTRG.21330	MSTRG.21330	0.00266838	-1.76719	potential_novel_lncRNA	NA	NA	intergenic	intergenic	u
MSTRG.4798	MSTRG.4798	0.0196186	-1.75095	potential_novel_lncRNA	NA	NA	antisense	antisense	x
MSTRG.7051	MSTRG.7051	0.00133836	-1.75046	potential_novel_lncRNA	NA	NA	intergenic	intergenic	u
MSTRG.29205	MSTRG.29205	2.46e-06	-1.74863	potential_novel_lncRNA	NA	NA	intergenic	intergenic	u
MSTRG.28964	MSTRG.28964	0.0149779	-1.74859	potential_novel_lncRNA	NA	NA	intergenic	intergenic	u
MSTRG.22621	MSTRG.22621	0.00825085	-1.74765	potential_novel_lncRNA	NA	NA	intergenic	intergenic	u
MSTRG.45944	MSTRG.45944	0.0213962	-1.74195	potential_novel_lncRNA	NA	NA	antisense	antisense	i
MSTRG.13222	MSTRG.13222	0.0132096	-1.68431	potential_novel_lncRNA	NA	NA	antisense	antisense	i
MSTRG.50734	MSTRG.50734	0.0366172	-1.67165	potential_novel_lncRNA	NA	NA	antisense	antisense	x
MSTRG.29719	MSTRG.29719	0.0280841	-1.66918	potential_novel_lncRNA	NA	NA	intergenic	intergenic	u
MSTRG.18633	MSTRG.18633	0.000714233	-1.61987	potential_novel_lncRNA	NA	NA	intergenic	intergenic	u
MSTRG.35160	MSTRG.35160	0.0328401	-1.61373	potential_novel_lncRNA	NA	NA	intergenic	intergenic	u
MSTRG.45290	MSTRG.45290	0.0224983	-1.58992	potential_novel_lncRNA	NA	NA	antisense	antisense	x
MSTRG.53971	MSTRG.53971	3.4e-05	-1.58166	potential_novel_lncRNA	NA	NA	intergenic	intergenic	u
MSTRG.49644	MSTRG.49644	9.9e-05	-1.58067	potential_novel_lncRNA	NA	NA	antisense	antisense	x
MSTRG.51077	MSTRG.51077	0.0013302	-1.57056	potential_novel_lncRNA	NA	NA	antisense	antisense	x
MSTRG.40079	MSTRG.40079	0.0140862	-1.56297	potential_novel_lncRNA	NA	NA	antisense	antisense	i
MSTRG.15446	MSTRG.15446	0.0112364	-1.56081	potential_novel_lncRNA	NA	NA	intergenic	intergenic	u
MSTRG.10879	MSTRG.10879	0.000670362	-1.5535	potential_novel_lncRNA	NA	NA	antisense	antisense	i
MSTRG.6484	MSTRG.6484	0.000662909	-1.54519	potential_novel_lncRNA	NA	NA	intergenic	intergenic	u
MSTRG.11772	MSTRG.11772	0.0106276	-1.53223	potential_novel_lncRNA	NA	NA	antisense	antisense	i
MSTRG.20412	MSTRG.20412	9.69e-06	-1.52853	potential_novel_lncRNA	NA	NA	intergenic	intergenic	u
MSTRG.11441	MSTRG.11441	4.24e-10	-1.50239	potential_novel_lncRNA	NA	NA	antisense	antisense	i
MSTRG.25976	MSTRG.25976	0.0340256	-1.48808	potential_novel_lncRNA	NA	NA	intergenic	intergenic	u
MSTRG.32264	MSTRG.32264	0.0120387	-1.48354	potential_novel_lncRNA	NA	NA	antisense	antisense	x
MSTRG.25937	MSTRG.25937	0.0019533	-1.48225	potential_novel_lncRNA	NA	NA	antisense	antisense	x
MSTRG.20407	MSTRG.20407	0.000174226	-1.47231	potential_novel_lncRNA	NA	NA	intergenic	intergenic	u
MSTRG.37344	MSTRG.37344	5.44e-07	-1.44631	potential_novel_lncRNA	NA	NA	antisense	antisense	i
MSTRG.18411	MSTRG.18411	0.00361516	-1.44441	potential_novel_lncRNA	NA	NA	intergenic	intergenic	u
MSTRG.43843	MSTRG.43843	0.0118974	-1.42388	potential_novel_lncRNA	NA	NA	intergenic	intergenic	u
MSTRG.13671	MSTRG.13671	0.00120647	-1.42116	potential_novel_lncRNA	NA	NA	intergenic	intergenic	u
MSTRG.15852	MSTRG.15852	0.00056081	-1.39794	potential_novel_lncRNA	NA	NA	antisense	antisense	i
MSTRG.50686	MSTRG.50686	0.0350748	-1.38755	potential_novel_lncRNA	NA	NA	antisense	antisense	x
MSTRG.46105	MSTRG.46105	0.000252725	-1.37257	potential_novel_lncRNA	NA	NA	antisense	antisense	x
MSTRG.3382	MSTRG.3382	0.0461438	-1.35602	potential_novel_lncRNA	NA	NA	intergenic	intergenic	u
MSTRG.18335	MSTRG.18335	0.00721372	-1.3088	potential_novel_lncRNA	NA	NA	intergenic	intergenic	u
MSTRG.1872	MSTRG.1872	0.019021	-1.30544	potential_novel_lncRNA	NA	NA	antisense	antisense	i
MSTRG.20403	MSTRG.20403	4.9e-07	-1.23246	potential_novel_lncRNA	NA	NA	antisense	antisense	x
MSTRG.34984	MSTRG.34984	0.00685384	-1.19962	potential_novel_lncRNA	NA	NA	intergenic	intergenic	u
MSTRG.14762	MSTRG.14762	4.73e-05	-1.19271	potential_novel_lncRNA	NA	NA	antisense	antisense	i
MSTRG.21397	MSTRG.21397	0.0375145	-1.16923	potential_novel_lncRNA	NA	NA	intergenic	intergenic	u
MSTRG.27267	MSTRG.27267	0.0422861	-1.07439	potential_novel_lncRNA	NA	NA	antisense	antisense	x
MSTRG.29280	MSTRG.29280	0.00204494	-1.06513	potential_novel_lncRNA	NA	NA	intergenic	intergenic	u
MSTRG.20388	MSTRG.20388	0.0108441	-1.05174	potential_novel_lncRNA	NA	NA	intergenic	intergenic	u
MSTRG.22459	MSTRG.22459	0.0280495	1.11463	potential_novel_lncRNA	NA	NA	antisense	antisense	x
MSTRG.6147	MSTRG.6147	1.6e-05	1.14931	potential_novel_lncRNA	NA	NA	antisense	antisense	x
MSTRG.26460	MSTRG.26460	1.41e-05	1.1554	potential_novel_lncRNA	NA	NA	antisense	antisense	i
MSTRG.36959	MSTRG.36959	0.00871996	1.19489	potential_novel_lncRNA	NA	NA	antisense	antisense	x
MSTRG.21140	MSTRG.21140	0.0417045	1.1998	potential_novel_lncRNA	NA	NA	intergenic	intergenic	u
MSTRG.17561	MSTRG.17561	0.0159133	1.21622	potential_novel_lncRNA	NA	NA	intergenic	intergenic	u
MSTRG.8144	MSTRG.8144	0.00239429	1.3045	potential_novel_lncRNA	NA	NA	antisense	antisense	x
MSTRG.28545	MSTRG.28545	0.0356482	1.35248	potential_novel_lncRNA	NA	NA	intergenic	intergenic	u
MSTRG.15638	MSTRG.15638	0.0277507	1.39891	potential_novel_lncRNA	NA	NA	intergenic	intergenic	u
MSTRG.26573	MSTRG.26573	0.0301872	1.44249	potential_novel_lncRNA	NA	NA	intergenic	intergenic	u
MSTRG.25728	MSTRG.25728	0.024377	1.44276	potential_novel_lncRNA	NA	NA	antisense	antisense	i
MSTRG.18382	MSTRG.18382	0.048816	1.45615	potential_novel_lncRNA	NA	NA	intergenic	intergenic	u
MSTRG.33156	MSTRG.33156	0.0197773	1.47128	potential_novel_lncRNA	NA	NA	intergenic	intergenic	u
MSTRG.7348	MSTRG.7348	0.0173418	1.47587	potential_novel_lncRNA	NA	NA	antisense	antisense	i
MSTRG.20633	MSTRG.20633	0.0156956	1.51156	potential_novel_lncRNA	NA	NA	antisense	antisense	x
MSTRG.14766	MSTRG.14766	0.0483551	1.51737	potential_novel_lncRNA	NA	NA	intergenic	intergenic	u
MSTRG.22605	MSTRG.22605	0.0153087	1.52615	potential_novel_lncRNA	NA	NA	antisense	antisense	x
MSTRG.21763	MSTRG.21763	0.0147937	1.52963	potential_novel_lncRNA	NA	NA	antisense	antisense	x
MSTRG.23073	MSTRG.23073	0.0340256	1.52972	potential_novel_lncRNA	NA	NA	intergenic	intergenic	u
MSTRG.45132	MSTRG.45132	0.000195393	1.57944	potential_novel_lncRNA	NA	NA	intergenic	intergenic	u
MSTRG.22627	MSTRG.22627	0.000497319	1.59777	potential_novel_lncRNA	NA	NA	intergenic	intergenic	u
MSTRG.30495	MSTRG.30495	0.0244518	1.61546	potential_novel_lncRNA	NA	NA	intergenic	intergenic	u
MSTRG.38274	MSTRG.38274	0.00334402	1.64384	potential_novel_lncRNA	NA	NA	intergenic	intergenic	u
MSTRG.20136	MSTRG.20136	4.37e-05	1.64387	potential_novel_lncRNA	NA	NA	intergenic	intergenic	u
MSTRG.38441	MSTRG.38441	3.91e-07	1.65074	potential_novel_lncRNA	NA	NA	antisense	antisense	x
MSTRG.48166	MSTRG.48166	3.43e-05	1.66802	potential_novel_lncRNA	NA	NA	antisense	antisense	i
MSTRG.22551	MSTRG.22551	0.00098588	1.67025	potential_novel_lncRNA	NA	NA	antisense	antisense	i
MSTRG.28058	MSTRG.28058	0.0156107	1.67805	potential_novel_lncRNA	NA	NA	antisense	antisense	x
MSTRG.18453	MSTRG.18453	0.00496748	1.67885	potential_novel_lncRNA	NA	NA	antisense	antisense	x
MSTRG.48662	MSTRG.48662	1.78e-07	1.69012	potential_novel_lncRNA	NA	NA	antisense	antisense	i
MSTRG.21612	MSTRG.21612	0.029871	1.69579	potential_novel_lncRNA	NA	NA	antisense	antisense	x
MSTRG.28457	MSTRG.28457	0.027907	1.72982	potential_novel_lncRNA	NA	NA	antisense	antisense	i
MSTRG.17543	MSTRG.17543	0.0141628	1.74456	potential_novel_lncRNA	NA	NA	intergenic	intergenic	u
MSTRG.51234	MSTRG.51234	0.0151729	1.74784	potential_novel_lncRNA	NA	NA	antisense	antisense,intergenic	x,u
MSTRG.51751	MSTRG.51751	1.42e-05	1.75713	potential_novel_lncRNA	NA	NA	intergenic	intergenic	u
MSTRG.38439	MSTRG.38439	0.0243022	1.76027	potential_novel_lncRNA	NA	NA	antisense	antisense	i
MSTRG.5908	MSTRG.5908	0.000554989	1.77331	potential_novel_lncRNA	NA	NA	intergenic	intergenic	u
MSTRG.52939	MSTRG.52939	3.41e-06	1.78564	potential_novel_lncRNA	NA	NA	antisense	antisense	i
MSTRG.37100	MSTRG.37100	0.00370708	1.79858	potential_novel_lncRNA	NA	NA	antisense	antisense	x
MSTRG.34336	MSTRG.34336	0.000199898	1.81347	potential_novel_lncRNA	NA	NA	antisense	antisense	i
MSTRG.39497	MSTRG.39497	0.0345388	1.82872	potential_novel_lncRNA	NA	NA	intergenic	intergenic	u
MSTRG.10333	MSTRG.10333	0.000562715	1.83192	potential_novel_lncRNA	NA	NA	antisense	antisense	i
MSTRG.9477	MSTRG.9477	0.0385998	1.83788	potential_novel_lncRNA	NA	NA	antisense	antisense	i
MSTRG.31138	MSTRG.31138	0.0155292	1.85305	potential_novel_lncRNA	NA	NA	intergenic	intergenic	u
MSTRG.32041	MSTRG.32041	0.0102307	1.87611	potential_novel_lncRNA	NA	NA	intergenic	intergenic	u
MSTRG.18602	MSTRG.18602	0.00105616	1.89942	potential_novel_lncRNA	NA	NA	antisense	antisense,intergenic	x,u
MSTRG.42630	MSTRG.42630	0.0072414	1.92383	potential_novel_lncRNA	NA	NA	antisense	antisense	x
MSTRG.36918	MSTRG.36918	0.0319918	1.9239	potential_novel_lncRNA	NA	NA	intergenic	intergenic	u
MSTRG.5806	MSTRG.5806	1.27e-05	1.92675	potential_novel_lncRNA	NA	NA	intergenic	intergenic	u
MSTRG.24574	MSTRG.24574	0.0237581	1.94234	potential_novel_lncRNA	NA	NA	intergenic	intergenic	u
MSTRG.13735	MSTRG.13735	0.0290716	1.95454	potential_novel_lncRNA	NA	NA	antisense	antisense	x
MSTRG.36270	MSTRG.36270	0.0408147	1.97612	potential_novel_lncRNA	NA	NA	antisense	antisense	x
MSTRG.49127	MSTRG.49127	0.00195557	2.01166	potential_novel_lncRNA	NA	NA	intergenic	intergenic	u
MSTRG.46212	MSTRG.46212	0.0063123	2.04513	potential_novel_lncRNA	NA	NA	antisense	antisense	x
MSTRG.47307	MSTRG.47307	0.000222592	2.05328	potential_novel_lncRNA	NA	NA	intergenic	intergenic	u
MSTRG.48210	MSTRG.48210	0.0075464	2.12591	potential_novel_lncRNA	NA	NA	intergenic	intergenic	u
MSTRG.21743	MSTRG.21743	0.0135555	2.12627	potential_novel_lncRNA	NA	NA	antisense	antisense	x
MSTRG.20006	MSTRG.20006	0.00220123	2.159	potential_novel_lncRNA	NA	NA	antisense	antisense	x
MSTRG.31348	MSTRG.31348	0.015295	2.19375	potential_novel_lncRNA	NA	NA	antisense	antisense	x
MSTRG.16867	MSTRG.16867	0.00119482	2.20685	potential_novel_lncRNA	NA	NA	antisense	antisense,intergenic	x,u
MSTRG.10054	MSTRG.10054	7.07e-05	2.23242	potential_novel_lncRNA	NA	NA	antisense	antisense	i
MSTRG.30195	MSTRG.30195	0.0202297	2.26398	potential_novel_lncRNA	NA	NA	intergenic	intergenic	u
MSTRG.14873	MSTRG.14873	0.0158509	2.28026	potential_novel_lncRNA	NA	NA	intergenic	intergenic	u
MSTRG.33062	MSTRG.33062	2.06e-07	2.30543	potential_novel_lncRNA	NA	NA	antisense	antisense	x
MSTRG.20012	MSTRG.20012	0.0195237	2.35153	potential_novel_lncRNA	NA	NA	antisense	antisense	i
MSTRG.13249	MSTRG.13249	0.0154049	2.38328	potential_novel_lncRNA	NA	NA	antisense	antisense	i
MSTRG.35989	MSTRG.35989	0.00281047	2.40494	potential_novel_lncRNA	NA	NA	antisense	antisense	i
MSTRG.24085	MSTRG.24085	0.0275635	2.42057	potential_novel_lncRNA	NA	NA	antisense	antisense	x
MSTRG.41406	MSTRG.41406	1.66e-05	2.44113	potential_novel_lncRNA	NA	NA	antisense	antisense	x
MSTRG.45456	MSTRG.45456	0.00364784	2.44578	potential_novel_lncRNA	NA	NA	intergenic	intergenic	u
MSTRG.40718	MSTRG.40718	1.58e-05	2.46166	potential_novel_lncRNA	NA	NA	antisense	antisense	i
MSTRG.49753	MSTRG.49753	1.07e-05	2.46269	potential_novel_lncRNA	NA	NA	intergenic	intergenic	u
MSTRG.50166	MSTRG.50166	0.000503961	2.475	potential_novel_lncRNA	NA	NA	intergenic	intergenic	u
MSTRG.30442	MSTRG.30442	0.0101133	2.47786	potential_novel_lncRNA	NA	NA	antisense	antisense	x
MSTRG.20217	MSTRG.20217	8.09e-07	2.48938	potential_novel_lncRNA	NA	NA	antisense	antisense	x
MSTRG.33956	MSTRG.33956	5.15e-05	2.51627	potential_novel_lncRNA	NA	NA	intergenic	intergenic	u
MSTRG.50410	MSTRG.50410	0.0362466	2.56279	potential_novel_lncRNA	NA	NA	intergenic	intergenic	u
MSTRG.20154	MSTRG.20154	8.21e-06	2.5655	potential_novel_lncRNA	NA	NA	intergenic	intergenic	u
MSTRG.40719	MSTRG.40719	0.00186286	2.56962	potential_novel_lncRNA	NA	NA	antisense	antisense	i
MSTRG.16511	MSTRG.16511	0.0103508	2.57014	potential_novel_lncRNA	NA	NA	intergenic	intergenic	u
MSTRG.6974	MSTRG.6974	0.00784146	2.587	potential_novel_lncRNA	NA	NA	antisense	antisense	x
MSTRG.14780	MSTRG.14780	0.0343042	2.61409	potential_novel_lncRNA	NA	NA	intergenic	intergenic	u
MSTRG.20292	MSTRG.20292	0.00495259	2.69245	potential_novel_lncRNA	NA	NA	intergenic	intergenic	u
MSTRG.47304	MSTRG.47304	3.18e-06	2.70103	potential_novel_lncRNA	NA	NA	intergenic	intergenic	u
MSTRG.49539	MSTRG.49539	0.00420965	2.75037	potential_novel_lncRNA	NA	NA	intergenic	intergenic	u
MSTRG.13009	MSTRG.13009	0.0328401	2.78879	potential_novel_lncRNA	NA	NA	antisense	antisense	x
MSTRG.39423	MSTRG.39423	0.000569764	2.811	potential_novel_lncRNA	NA	NA	antisense	antisense	x
MSTRG.15190	MSTRG.15190	0.00516531	2.8375	potential_novel_lncRNA	NA	NA	intergenic	intergenic	u
MSTRG.9547	MSTRG.9547	0.000154262	2.84313	potential_novel_lncRNA	NA	NA	intergenic	intergenic	u
MSTRG.38190	MSTRG.38190	0.00109068	2.84536	potential_novel_lncRNA	NA	NA	intergenic	intergenic	u
MSTRG.9047	MSTRG.9047	0.00040968	2.89601	potential_novel_lncRNA	NA	NA	antisense	antisense	i
MSTRG.37767	MSTRG.37767	0.000110015	2.92218	potential_novel_lncRNA	NA	NA	intergenic	intergenic	u
MSTRG.24432	MSTRG.24432	0.0321311	2.93707	potential_novel_lncRNA	NA	NA	intergenic	intergenic	u
MSTRG.50409	MSTRG.50409	1.99e-06	2.95695	potential_novel_lncRNA	NA	NA	intergenic	intergenic	u
MSTRG.18417	MSTRG.18417	0.0120012	2.96832	potential_novel_lncRNA	NA	NA	intergenic	intergenic	u
MSTRG.21586	MSTRG.21586	0.00647178	3.09429	potential_novel_lncRNA	NA	NA	intergenic	intergenic	u
MSTRG.20940	MSTRG.20940	0.00110977	3.14359	potential_novel_lncRNA	NA	NA	intergenic	intergenic	u
MSTRG.21052	MSTRG.21052	8.75e-05	3.26098	potential_novel_lncRNA	NA	NA	intergenic	intergenic	u
MSTRG.16298	MSTRG.16298	0.000136259	3.38301	potential_novel_lncRNA	NA	NA	antisense	antisense	x
MSTRG.20934	MSTRG.20934	0.000155859	3.59864	potential_novel_lncRNA	NA	NA	intergenic	intergenic	u
MSTRG.50044	MSTRG.50044	3.15e-06	3.62173	potential_novel_lncRNA	NA	NA	intergenic	intergenic	u
MSTRG.15335	MSTRG.15335	1.13e-07	3.80343	potential_novel_lncRNA	NA	NA	intergenic	intergenic	u
MSTRG.8641	MSTRG.8641	0.00260925	3.80844	potential_novel_lncRNA	NA	NA	antisense	antisense	x
MSTRG.50096	MSTRG.50096	1.25e-06	3.85261	potential_novel_lncRNA	NA	NA	intergenic	intergenic	u
MSTRG.21451	MSTRG.21451	0.00254299	4.02026	potential_novel_lncRNA	NA	NA	intergenic	intergenic	u
MSTRG.16114	MSTRG.16114	5.69e-09	4.04111	potential_novel_lncRNA	NA	NA	antisense	antisense	x
MSTRG.14931	MSTRG.14931	4.72e-07	4.0866	potential_novel_lncRNA	NA	NA	intergenic	intergenic	u
MSTRG.50408	MSTRG.50408	5.81e-08	4.36672	potential_novel_lncRNA	NA	NA	intergenic	intergenic	u
MSTRG.25183	MSTRG.25183	3.16e-05	4.45888	potential_novel_lncRNA	NA	NA	intergenic	intergenic	u
MSTRG.1472	MSTRG.1472	5.63e-09	4.54909	potential_novel_lncRNA	NA	NA	antisense	antisense	x
MSTRG.21545	MSTRG.21545	2.11e-06	4.80767	potential_novel_lncRNA	NA	NA	intergenic	intergenic	u
MSTRG.22464	MSTRG.22464	0.0225128	5.41908	potential_novel_lncRNA	NA	NA	antisense	antisense	i
MSTRG.23679	MSTRG.23679	3.36e-14	6.17325	potential_novel_lncRNA	NA	NA	antisense	antisense	i
ENSMUSG00000047517	Dmbt1	7.93e-40	-9.10376	protein_coding	protein_coding	protein_coding,processed_transcript	NA	NA	NA
ENSMUSG00000096001	2610528A11Rik	3.24e-09	-7.55087	protein_coding	protein_coding	processed_transcript,protein_coding	NA	NA	NA
ENSMUSG00000042985	Upk3b	5.72e-23	-7.55034	protein_coding	protein_coding	protein_coding	NA	NA	NA
ENSMUSG00000037161	Mgarp	2.4e-49	-7.46128	protein_coding	protein_coding	protein_coding,retained_intron,processed_transcript	NA	NA	NA
ENSMUSG00000079516	Reg3a	5.55e-76	-7.46004	protein_coding	protein_coding	protein_coding	NA	NA	NA
ENSMUSG00000059654	Reg1	1.13e-21	-7.42964	protein_coding	protein_coding	protein_coding	NA	NA	NA
ENSMUSG00000040280	Ndufa4l2	5.02e-07	-7.03414	protein_coding	protein_coding	protein_coding	NA	NA	NA
ENSMUSG00000094690	1600014C23Rik	5.68e-18	-6.68785	protein_coding	protein_coding	protein_coding	NA	NA	NA
ENSMUSG00000028874	Fgr	3.16e-28	-6.52999	protein_coding	protein_coding	processed_transcript,protein_coding	NA	NA	NA
ENSMUSG00000028747	Htr6	2.96e-08	-6.4806	protein_coding	protein_coding	protein_coding	NA	NA	NA
ENSMUSG00000038770	Kpna7	4.74e-05	-6.37826	protein_coding	protein_coding	protein_coding,processed_transcript	NA	NA	NA
ENSMUSG00000051452	Gm11437	1.43e-21	-6.33905	protein_coding	protein_coding	protein_coding	NA	NA	NA
ENSMUSG00000044017	Adgrd1	5e-20	-6.32283	protein_coding	protein_coding	protein_coding,retained_intron	NA	NA	NA
ENSMUSG00000074639	BC089597	1.07e-14	-6.28684	protein_coding	protein_coding	protein_coding	NA	NA	NA
ENSMUSG00000028527	Ak4	1.63e-23	-6.27541	protein_coding	protein_coding	protein_coding,processed_transcript	NA	NA	NA
ENSMUSG00000033898	Cfhr2	7.01e-05	-6.07855	protein_coding	protein_coding	protein_coding	NA	NA	NA
ENSMUSG00000085957	Syna	1.5e-26	-6.0675	protein_coding	protein_coding	protein_coding	NA	NA	NA
ENSMUSG00000032807	Alox12b	4.16e-06	-6.00084	protein_coding	protein_coding	protein_coding	NA	NA	NA
ENSMUSG00000030762	Aqp8	7.67e-06	-5.96261	protein_coding	protein_coding	protein_coding,processed_transcript	NA	NA	NA
ENSMUSG00000036526	Card11	8.8e-26	-5.91087	protein_coding	protein_coding	protein_coding,retained_intron	NA	NA	NA
ENSMUSG00000068341	Reg3d	5.12e-17	-5.89384	protein_coding	protein_coding	protein_coding	NA	NA	NA
ENSMUSG00000030737	Slco2b1	2.64e-44	-5.79613	protein_coding	protein_coding	protein_coding	NA	NA	NA
ENSMUSG00000029335	Bmp3	1.06e-103	-5.76774	protein_coding	protein_coding	protein_coding	NA	NA	NA
ENSMUSG00000036196	Slc26a8	3.64e-26	-5.71559	protein_coding	protein_coding	protein_coding,retained_intron	NA	NA	NA
ENSMUSG00000029082	Bst1	6.99e-07	-5.6401	protein_coding	protein_coding	nonsense_mediated_decay,protein_coding,retained_intron	NA	NA	NA
ENSMUSG00000040703	Cyp2s1	2.13e-17	-5.58939	protein_coding	protein_coding	protein_coding,retained_intron	NA	NA	NA
ENSMUSG00000028463	Car9	9.72e-15	-5.53185	protein_coding	protein_coding	protein_coding,processed_transcript	NA	NA	NA
ENSMUSG00000022026	Olfm4	1.63e-05	-5.50777	protein_coding	protein_coding	protein_coding	NA	NA	NA
ENSMUSG00000026786	Apbb1ip	3.95e-13	-5.49456	protein_coding	protein_coding	protein_coding,processed_transcript,retained_intron	NA	NA	NA
ENSMUSG00000037797	Adh4	1.45e-14	-5.48182	protein_coding	protein_coding	processed_transcript,protein_coding	NA	NA	NA
ENSMUSG00000026246	Alppl2	1.1e-06	-5.43006	protein_coding	protein_coding	protein_coding,retained_intron	NA	NA	NA
ENSMUSG00000028167	Bdh2	6.31e-10	-5.42045	protein_coding	protein_coding	protein_coding,retained_intron,processed_transcript	NA	NA	NA
ENSMUSG00000001095	Slc13a2	2.41e-18	-5.40892	protein_coding	protein_coding	protein_coding	NA	NA	NA
ENSMUSG00000026586	Prrx1	8.4e-14	-5.2649	protein_coding	protein_coding	protein_coding,processed_transcript,retained_intron	NA	NA	NA
ENSMUSG00000096717	Vmn2r98	0.00794101	-5.218	protein_coding	protein_coding	protein_coding	NA	NA	NA
ENSMUSG00000025161	Slc16a3	4.47e-20	-5.2174	protein_coding	protein_coding	protein_coding,processed_transcript,retained_intron	NA	NA	NA
ENSMUSG00000035459	Stab2	6.14e-13	-5.18103	protein_coding	protein_coding	protein_coding	NA	NA	NA
ENSMUSG00000040134	Rdh7	3.19e-44	-5.15906	protein_coding	protein_coding	protein_coding,processed_transcript	NA	NA	NA
ENSMUSG00000056973	Ces1d	8.84e-14	-5.07678	protein_coding	protein_coding	protein_coding,retained_intron	NA	NA	NA
ENSMUSG00000061740	Cyp2d22	5.14e-08	-4.94135	protein_coding	protein_coding	protein_coding	NA	NA	NA
ENSMUSG00000020838	Slc6a4	1.82e-115	-4.90906	protein_coding	protein_coding	protein_coding,retained_intron	NA	NA	NA
ENSMUSG00000050982	Apol10a	3e-08	-4.90149	protein_coding	protein_coding	protein_coding,processed_transcript	NA	NA	NA
ENSMUSG00000032081	Apoc3	1.21e-12	-4.85401	protein_coding	protein_coding	protein_coding,processed_transcript	NA	NA	NA
ENSMUSG00000078650	G6pc	6.32e-10	-4.83553	protein_coding	protein_coding	protein_coding	NA	NA	NA
ENSMUSG00000033213	AA467197	1.27e-06	-4.83514	protein_coding	protein_coding	protein_coding,processed_transcript	NA	NA	NA
ENSMUSG00000021223	Papln	1.39e-28	-4.82883	protein_coding	protein_coding	protein_coding,retained_intron	NA	NA	NA
ENSMUSG00000018862	Otop3	2.52e-26	-4.81294	protein_coding	protein_coding	protein_coding	NA	NA	NA
ENSMUSG00000019359	Gdpd2	5.65e-11	-4.78297	protein_coding	protein_coding	processed_transcript,retained_intron,protein_coding	NA	NA	NA
ENSMUSG00000024354	Slc23a1	2.46e-13	-4.77052	protein_coding	protein_coding	protein_coding,nonsense_mediated_decay,processed_transcript	NA	NA	NA
ENSMUSG00000067235	H2-Q10	1.44e-27	-4.76513	protein_coding	protein_coding	protein_coding,retained_intron	NA	NA	NA
ENSMUSG00000038751	Ptk6	6.95e-05	-4.73495	protein_coding	protein_coding	protein_coding	NA	NA	NA
ENSMUSG00000035239	Neu3	5.9e-15	-4.73026	protein_coding	protein_coding	protein_coding	NA	NA	NA
ENSMUSG00000024600	Slc27a6	1.27e-24	-4.7299	protein_coding	protein_coding	protein_coding	NA	NA	NA
ENSMUSG00000054422	Fabp1	7.97e-15	-4.70329	protein_coding	protein_coding	protein_coding	NA	NA	NA
ENSMUSG00000030048	Gkn3	2.28e-07	-4.6871	protein_coding	protein_coding	protein_coding	NA	NA	NA
ENSMUSG00000062064	Slc2a7	5.91e-11	-4.68366	protein_coding	protein_coding	protein_coding,retained_intron	NA	NA	NA
ENSMUSG00000031445	Proz	2.57e-20	-4.63842	protein_coding	protein_coding	retained_intron,protein_coding,nonsense_mediated_decay	NA	NA	NA
ENSMUSG00000032080	Apoa4	9.49e-30	-4.63466	protein_coding	protein_coding	protein_coding	NA	NA	NA
ENSMUSG00000021125	Arg2	1.75e-22	-4.60954	protein_coding	protein_coding	protein_coding	NA	NA	NA
ENSMUSG00000026959	Grin1	9.74e-06	-4.60827	protein_coding	protein_coding	protein_coding,processed_transcript	NA	NA	NA
ENSMUSG00000053054	Adh6a	1.19e-17	-4.57514	protein_coding	protein_coding	protein_coding	NA	NA	NA
ENSMUSG00000024411	Aqp4	3.62e-34	-4.53051	protein_coding	protein_coding	protein_coding	NA	NA	NA
ENSMUSG00000032292	Nr2e3	1.17e-09	-4.51744	protein_coding	protein_coding	protein_coding,retained_intron,processed_transcript	NA	NA	NA
ENSMUSG00000046262	C87977	2.23e-12	-4.47213	protein_coding	protein_coding	protein_coding,processed_transcript	NA	NA	NA
ENSMUSG00000021228	Acot3	7.54e-11	-4.4657	protein_coding	protein_coding	protein_coding	NA	NA	NA
ENSMUSG00000027761	Aadac	6.39e-42	-4.46561	protein_coding	protein_coding	processed_transcript,protein_coding,retained_intron	NA	NA	NA
ENSMUSG00000031957	Ctrb1	2.18e-21	-4.46019	protein_coding	protein_coding	protein_coding	NA	NA	NA
ENSMUSG00000024935	Slc1a1	8.41e-21	-4.45183	protein_coding	protein_coding	retained_intron,protein_coding	NA	NA	NA
ENSMUSG00000047977	Synb	0.00337726	-4.42738	protein_coding	protein_coding	protein_coding	NA	NA	NA
ENSMUSG00000052131	Akr1b7	1.09e-12	-4.40048	protein_coding	protein_coding	protein_coding	NA	NA	NA
ENSMUSG00000067818	Myl9	0.00411291	-4.3401	protein_coding	protein_coding	protein_coding,processed_transcript	NA	NA	NA
ENSMUSG00000027792	Bche	7.47e-28	-4.33801	protein_coding	protein_coding	protein_coding,retained_intron,processed_transcript	NA	NA	NA
ENSMUSG00000031173	Otc	1e-101	-4.31733	protein_coding	protein_coding	protein_coding	NA	NA	NA
ENSMUSG00000006345	Ggt1	8.37e-24	-4.31251	protein_coding	protein_coding	protein_coding,processed_transcript,retained_intron	NA	NA	NA
ENSMUSG00000037583	Nr0b2	1.9e-09	-4.28286	protein_coding	protein_coding	protein_coding	NA	NA	NA
ENSMUSG00000040592	Cd79b	8.14e-05	-4.2822	protein_coding	protein_coding	protein_coding	NA	NA	NA
ENSMUSG00000074435	Smcp	9.92e-07	-4.27445	protein_coding	protein_coding	protein_coding	NA	NA	NA
ENSMUSG00000051669	AU021092	1.04e-08	-4.26338	protein_coding	protein_coding	protein_coding	NA	NA	NA
ENSMUSG00000084174	Sycn	5.52e-09	-4.24618	protein_coding	protein_coding	protein_coding	NA	NA	NA
ENSMUSG00000031886	Ces2e	1.9e-27	-4.22702	protein_coding	protein_coding	protein_coding	NA	NA	NA
ENSMUSG00000025991	Cps1	4.5e-38	-4.20997	protein_coding	protein_coding	protein_coding	NA	NA	NA
ENSMUSG00000032808	Cyp2c38	1.03e-06	-4.20437	protein_coding	protein_coding	protein_coding	NA	NA	NA
ENSMUSG00000074028	Slc22a13	3.01e-12	-4.1991	protein_coding	protein_coding	protein_coding	NA	NA	NA
ENSMUSG00000030790	Adm	2.52e-06	-4.15896	protein_coding	protein_coding	protein_coding,retained_intron	NA	NA	NA
ENSMUSG00000028730	Cfap57	0.000577522	-4.14241	protein_coding	protein_coding	protein_coding	NA	NA	NA
ENSMUSG00000042096	Dao	3.85e-12	-4.12679	protein_coding	protein_coding	protein_coding,retained_intron	NA	NA	NA
ENSMUSG00000028003	Lrat	2.74e-41	-4.1203	protein_coding	protein_coding	protein_coding	NA	NA	NA
ENSMUSG00000060224	Pyroxd2	6.83e-11	-4.11451	protein_coding	protein_coding	protein_coding	NA	NA	NA
ENSMUSG00000023030	Slc11a2	0.000723934	-4.08922	protein_coding	protein_coding	protein_coding,retained_intron,nonsense_mediated_decay	NA	NA	NA
ENSMUSG00000021609	Slc6a3	1.19e-06	-4.08687	protein_coding	protein_coding	protein_coding	NA	NA	NA
ENSMUSG00000055675	Kbtbd11	2.41e-12	-4.06822	protein_coding	protein_coding	protein_coding,processed_transcript,nonsense_mediated_decay	NA	NA	NA
ENSMUSG00000020101	Vsir	1.34e-14	-4.04977	protein_coding	protein_coding	protein_coding,processed_transcript,retained_intron	NA	NA	NA
ENSMUSG00000038641	Akr1d1	2.07e-05	-4.04	protein_coding	protein_coding	protein_coding,processed_transcript	NA	NA	NA
ENSMUSG00000025726	Slc28a1	6.38e-07	-4.03104	protein_coding	protein_coding	protein_coding	NA	NA	NA
ENSMUSG00000026614	Slc30a10	3.01e-10	-4.02805	protein_coding	protein_coding	protein_coding	NA	NA	NA
ENSMUSG00000042816	Gpr151	0.00176	-4.02566	protein_coding	protein_coding	protein_coding	NA	NA	NA
ENSMUSG00000056529	Ptafr	3.53e-05	-4.02406	protein_coding	protein_coding	protein_coding	NA	NA	NA
ENSMUSG00000042155	Klhl23	9.39e-11	-4.01075	protein_coding	protein_coding	processed_transcript,protein_coding	NA	NA	NA
ENSMUSG00000090175	Ugt1a9	8.55e-49	-4.00543	protein_coding	protein_coding	protein_coding	NA	NA	NA
ENSMUSG00000000673	Haao	5.82e-06	-3.99344	protein_coding	protein_coding	protein_coding	NA	NA	NA
ENSMUSG00000037071	Scd1	1.75e-20	-3.96339	protein_coding	protein_coding	protein_coding	NA	NA	NA
ENSMUSG00000026247	Ecel1	3.08e-07	-3.94957	protein_coding	protein_coding	protein_coding,retained_intron,processed_transcript	NA	NA	NA
ENSMUSG00000032278	Paqr5	1.35e-07	-3.9474	protein_coding	protein_coding	processed_transcript,protein_coding	NA	NA	NA
ENSMUSG00000035105	Egln3	2.76e-06	-3.94303	protein_coding	protein_coding	protein_coding	NA	NA	NA
ENSMUSG00000056671	Prelid2	3.34e-15	-3.94105	protein_coding	protein_coding	protein_coding	NA	NA	NA
ENSMUSG00000026354	Lct	5.64e-09	-3.91082	protein_coding	protein_coding	protein_coding,retained_intron	NA	NA	NA
ENSMUSG00000030382	Slc27a5	1.07e-06	-3.84866	protein_coding	protein_coding	protein_coding,retained_intron	NA	NA	NA
ENSMUSG00000009378	Slc16a12	5.18e-34	-3.8406	protein_coding	protein_coding	protein_coding	NA	NA	NA
ENSMUSG00000028008	Asic5	7.09e-05	-3.83671	protein_coding	protein_coding	processed_transcript,protein_coding	NA	NA	NA
ENSMUSG00000028602	Tnfrsf8	1.89e-18	-3.82591	protein_coding	protein_coding	protein_coding,nonsense_mediated_decay	NA	NA	NA
ENSMUSG00000032098	Treh	4.18e-18	-3.81424	protein_coding	protein_coding	protein_coding,nonsense_mediated_decay	NA	NA	NA
ENSMUSG00000025197	Cyp2c44	1.61e-09	-3.80168	protein_coding	protein_coding	protein_coding	NA	NA	NA
ENSMUSG00000040127	Sdr9c7	5.52e-09	-3.79915	protein_coding	protein_coding	protein_coding,processed_transcript	NA	NA	NA
ENSMUSG00000030787	Lyve1	1.39e-22	-3.79867	protein_coding	protein_coding	protein_coding,retained_intron	NA	NA	NA
ENSMUSG00000044364	Tmem74b	3.8e-07	-3.79111	protein_coding	protein_coding	protein_coding	NA	NA	NA
ENSMUSG00000066438	Plekhd1	4.02e-26	-3.77701	protein_coding	protein_coding	protein_coding,processed_transcript,nonsense_mediated_decay,retained_intron	NA	NA	NA
ENSMUSG00000005237	Dnah2	6.44e-13	-3.77619	protein_coding	protein_coding	protein_coding,processed_transcript	NA	NA	NA
ENSMUSG00000032769	Trpa1	1.33e-27	-3.74357	protein_coding	protein_coding	protein_coding	NA	NA	NA
ENSMUSG00000068323	Slc4a5	7.53e-19	-3.73677	protein_coding	protein_coding	protein_coding,processed_transcript	NA	NA	NA
ENSMUSG00000054630	Ugt2b5	6.75e-14	-3.73259	protein_coding	protein_coding	protein_coding	NA	NA	NA
ENSMUSG00000050914	Ankrd37	1.46e-06	-3.7298	protein_coding	protein_coding	protein_coding,nonsense_mediated_decay,retained_intron,processed_transcript	NA	NA	NA
ENSMUSG00000030972	Acsm5	3.27e-08	-3.72458	protein_coding	protein_coding	nonsense_mediated_decay,protein_coding	NA	NA	NA
ENSMUSG00000069805	Fbp1	1.45e-06	-3.72131	protein_coding	protein_coding	protein_coding,nonsense_mediated_decay	NA	NA	NA
ENSMUSG00000110086	Gm45623	4.36e-06	-3.70505	protein_coding	protein_coding	protein_coding	NA	NA	NA
ENSMUSG00000046697	Enpp7	7e-05	-3.69242	protein_coding	protein_coding	protein_coding	NA	NA	NA
ENSMUSG00000024713	Pcsk5	4.8e-27	-3.69142	protein_coding	protein_coding	protein_coding	NA	NA	NA
ENSMUSG00000030785	Cox6a2	6.55e-07	-3.67764	protein_coding	protein_coding	protein_coding	NA	NA	NA
ENSMUSG00000015879	Fam184b	0.0122076	-3.66412	protein_coding	protein_coding	protein_coding,retained_intron	NA	NA	NA
ENSMUSG00000004328	Hif3a	9.11e-05	-3.65613	protein_coding	protein_coding	protein_coding	NA	NA	NA
ENSMUSG00000031448	Adprhl1	4.85e-08	-3.64883	protein_coding	protein_coding	protein_coding,retained_intron	NA	NA	NA
ENSMUSG00000032083	Apoa1	1.05e-11	-3.63804	protein_coding	protein_coding	protein_coding	NA	NA	NA
ENSMUSG00000058794	Nfe2	5.22e-06	-3.63654	protein_coding	protein_coding	protein_coding	NA	NA	NA
ENSMUSG00000027690	Slc2a2	3.86e-08	-3.63161	protein_coding	protein_coding	protein_coding,nonsense_mediated_decay,retained_intron	NA	NA	NA
ENSMUSG00000029716	Tfr2	2.8e-05	-3.62967	protein_coding	protein_coding	protein_coding,retained_intron	NA	NA	NA
ENSMUSG00000031698	Mylk3	4.59e-12	-3.62406	protein_coding	protein_coding	protein_coding,retained_intron	NA	NA	NA
ENSMUSG00000078502	Gm13212	7.31e-34	-3.60773	protein_coding	protein_coding	protein_coding	NA	NA	NA
ENSMUSG00000022949	Clic6	3.09e-09	-3.58922	protein_coding	protein_coding	protein_coding	NA	NA	NA
ENSMUSG00000006494	Pdk1	9.18e-20	-3.58719	protein_coding	protein_coding	protein_coding,processed_transcript	NA	NA	NA
ENSMUSG00000065952	C330021F23Rik	5.78e-09	-3.58489	protein_coding	protein_coding	retained_intron,protein_coding	NA	NA	NA
ENSMUSG00000022489	Pde1b	1.82e-30	-3.58452	protein_coding	protein_coding	protein_coding	NA	NA	NA
ENSMUSG00000020229	Slc5a4a	3.23e-08	-3.58008	protein_coding	protein_coding	protein_coding	NA	NA	NA
ENSMUSG00000024818	Slc25a45	1.02e-10	-3.5707	protein_coding	protein_coding	protein_coding	NA	NA	NA
ENSMUSG00000078566	Bnip3	5.49e-11	-3.56501	protein_coding	protein_coding	protein_coding,retained_intron,processed_transcript	NA	NA	NA
ENSMUSG00000094559	Cyp2d34	9.67e-12	-3.55649	protein_coding	protein_coding	protein_coding	NA	NA	NA
ENSMUSG00000020226	Slc5a4b	1.57e-21	-3.54214	protein_coding	protein_coding	protein_coding	NA	NA	NA
ENSMUSG00000051726	Kcnf1	1.25e-26	-3.53744	protein_coding	protein_coding	protein_coding	NA	NA	NA
ENSMUSG00000073409	H2-Q6	2.58e-09	-3.53671	protein_coding	protein_coding	protein_coding	NA	NA	NA
ENSMUSG00000036814	Slc6a20a	6.73e-08	-3.52707	protein_coding	protein_coding	protein_coding	NA	NA	NA
ENSMUSG00000091387	Gcnt4	1.57e-48	-3.50854	protein_coding	protein_coding	protein_coding	NA	NA	NA
ENSMUSG00000043673	Kcns3	0.00200016	-3.50205	protein_coding	protein_coding	protein_coding	NA	NA	NA
ENSMUSG00000026621	2001-03-01	8.83e-10	-3.50078	protein_coding	protein_coding	protein_coding	NA	NA	NA
ENSMUSG00000064225	Paqr9	2.88e-06	-3.49469	protein_coding	protein_coding	protein_coding	NA	NA	NA
ENSMUSG00000038745	Nlrp6	2.17e-24	-3.49209	protein_coding	protein_coding	protein_coding,retained_intron	NA	NA	NA
ENSMUSG00000074218	Cox7a1	2.94e-08	-3.48664	protein_coding	protein_coding	protein_coding	NA	NA	NA
ENSMUSG00000026401	Cd55b	4.98e-11	-3.48371	protein_coding	protein_coding	protein_coding,processed_transcript	NA	NA	NA
ENSMUSG00000068877	Selenbp2	6.67e-05	-3.48025	protein_coding	protein_coding	protein_coding,retained_intron,nonsense_mediated_decay,processed_transcript	NA	NA	NA
ENSMUSG00000047810	Ccdc88b	0.000111473	-3.47889	protein_coding	protein_coding	protein_coding	NA	NA	NA
ENSMUSG00000024747	Aldh1a7	1.98e-68	-3.46773	protein_coding	protein_coding	protein_coding	NA	NA	NA
ENSMUSG00000074652	Myh7b	0.000176765	-3.45656	protein_coding	protein_coding	protein_coding,processed_transcript,retained_intron	NA	NA	NA
ENSMUSG00000019278	Dpep1	1.25e-12	-3.45654	protein_coding	protein_coding	protein_coding	NA	NA	NA
ENSMUSG00000034164	Emid1	0.00454139	-3.44792	protein_coding	protein_coding	protein_coding,retained_intron,nonsense_mediated_decay,processed_transcript	NA	NA	NA
ENSMUSG00000006711	D130043K22Rik	0.0447247	-3.42261	protein_coding	protein_coding	protein_coding,nonsense_mediated_decay,processed_transcript	NA	NA	NA
ENSMUSG00000073988	Ttpa	0.000161523	-3.41838	protein_coding	protein_coding	protein_coding	NA	NA	NA
ENSMUSG00000043286	Pnpla1	7.54e-13	-3.41375	protein_coding	protein_coding	protein_coding	NA	NA	NA
ENSMUSG00000025243	Slc6a20b	6.42e-05	-3.41302	protein_coding	protein_coding	protein_coding,nonsense_mediated_decay,processed_transcript	NA	NA	NA
ENSMUSG00000090700	Cyp4f40	5.34e-14	-3.40541	protein_coding	protein_coding	protein_coding	NA	NA	NA
ENSMUSG00000028996	Rbp7	9.51e-13	-3.4042	protein_coding	protein_coding	protein_coding,nonsense_mediated_decay,processed_transcript	NA	NA	NA
ENSMUSG00000045087	S1pr5	0.000648292	-3.40005	protein_coding	protein_coding	protein_coding	NA	NA	NA
ENSMUSG00000070332	Trim80	5.51e-06	-3.38314	protein_coding	protein_coding	protein_coding	NA	NA	NA
ENSMUSG00000039878	Slc39a5	5.02e-69	-3.37414	protein_coding	protein_coding	protein_coding	NA	NA	NA
ENSMUSG00000026417	Pigr	1.35e-37	-3.37361	protein_coding	protein_coding	protein_coding	NA	NA	NA
ENSMUSG00000046794	Ppp1r3b	4.28e-14	-3.37348	protein_coding	protein_coding	protein_coding,processed_transcript	NA	NA	NA
ENSMUSG00000040258	Nxph4	0.000348542	-3.36406	protein_coding	protein_coding	protein_coding	NA	NA	NA
ENSMUSG00000051262	Nat8f3	0.00259575	-3.35543	protein_coding	protein_coding	processed_transcript,protein_coding	NA	NA	NA
ENSMUSG00000001225	Slc26a3	5.65e-14	-3.346	protein_coding	protein_coding	protein_coding,nonsense_mediated_decay,retained_intron	NA	NA	NA
ENSMUSG00000022993	4930415O20Rik	9.94e-05	-3.34426	protein_coding	protein_coding	protein_coding	NA	NA	NA
ENSMUSG00000000791	Il12rb1	0.000450202	-3.33363	protein_coding	protein_coding	protein_coding,retained_intron	NA	NA	NA
ENSMUSG00000034371	Tkfc	7.19e-14	-3.32995	protein_coding	protein_coding	protein_coding	NA	NA	NA
ENSMUSG00000028332	Hemgn	5.58e-09	-3.32367	protein_coding	protein_coding	protein_coding	NA	NA	NA
ENSMUSG00000039339	Mfsd4b2	2.33e-15	-3.31548	protein_coding	protein_coding	protein_coding	NA	NA	NA
ENSMUSG00000030364	Clec2h	1.6e-08	-3.30665	protein_coding	protein_coding	protein_coding,nonsense_mediated_decay,retained_intron	NA	NA	NA
ENSMUSG00000029162	Khk	8.85e-10	-3.30272	protein_coding	protein_coding	protein_coding,retained_intron	NA	NA	NA
ENSMUSG00000079495	Nat8f6	7.12e-07	-3.29913	protein_coding	protein_coding	protein_coding	NA	NA	NA
ENSMUSG00000033453	Adamts15	1.01e-41	-3.28923	protein_coding	protein_coding	protein_coding,retained_intron	NA	NA	NA
ENSMUSG00000005268	Prlr	1.63e-29	-3.28783	protein_coding	protein_coding	retained_intron,processed_transcript,nonsense_mediated_decay,protein_coding	NA	NA	NA
ENSMUSG00000053216	Btn2a2	0.00300868	-3.28637	protein_coding	protein_coding	protein_coding	NA	NA	NA
ENSMUSG00000090164	BC035044	0.000271671	-3.27978	protein_coding	protein_coding	protein_coding	NA	NA	NA
ENSMUSG00000057604	Lmcd1	3.19e-14	-3.27969	protein_coding	protein_coding	protein_coding	NA	NA	NA
ENSMUSG00000060613	Cyp2c70	6.18e-07	-3.27476	protein_coding	protein_coding	protein_coding,nonsense_mediated_decay,retained_intron	NA	NA	NA
ENSMUSG00000055538	Zcchc24	0.00852564	-3.26796	protein_coding	protein_coding	protein_coding,retained_intron	NA	NA	NA
ENSMUSG00000035226	Rims4	0.00010604	-3.26346	protein_coding	protein_coding	protein_coding	NA	NA	NA
ENSMUSG00000026430	Rassf5	2.77e-22	-3.26026	protein_coding	protein_coding	protein_coding,processed_transcript	NA	NA	NA
ENSMUSG00000039304	Tnfsf10	3.96e-08	-3.2599	protein_coding	protein_coding	protein_coding	NA	NA	NA
ENSMUSG00000026489	Coq8a	1.41e-29	-3.25572	protein_coding	protein_coding	protein_coding,nonsense_mediated_decay,retained_intron	NA	NA	NA
ENSMUSG00000024292	Cyp4f14	9.65e-10	-3.25468	protein_coding	protein_coding	protein_coding	NA	NA	NA
ENSMUSG00000028024	Enpep	1.21e-08	-3.25175	protein_coding	protein_coding	protein_coding,nonsense_mediated_decay,retained_intron	NA	NA	NA
ENSMUSG00000078202	Nrarp	8.76e-09	-3.24536	protein_coding	protein_coding	protein_coding	NA	NA	NA
ENSMUSG00000044313	Mab21l3	0.000289755	-3.24043	protein_coding	protein_coding	protein_coding	NA	NA	NA
ENSMUSG00000048572	Tmem252	1.32e-24	-3.22354	protein_coding	protein_coding	protein_coding	NA	NA	NA
ENSMUSG00000059149	Mfsd4a	1.12e-07	-3.2214	protein_coding	protein_coding	protein_coding,retained_intron,nonsense_mediated_decay,processed_transcript	NA	NA	NA
ENSMUSG00000024124	Prss30	0.000149416	-3.20569	protein_coding	protein_coding	protein_coding,retained_intron,nonsense_mediated_decay	NA	NA	NA
ENSMUSG00000048988	Elfn1	0.000637346	-3.20129	protein_coding	protein_coding	protein_coding,processed_transcript	NA	NA	NA
ENSMUSG00000030303	Far2	1.13e-56	-3.1958	protein_coding	protein_coding	protein_coding,retained_intron	NA	NA	NA
ENSMUSG00000068874	Selenbp1	2.34e-08	-3.19181	protein_coding	protein_coding	protein_coding,nonsense_mediated_decay,retained_intron,processed_transcript	NA	NA	NA
ENSMUSG00000028435	Aqp3	4.88e-09	-3.19078	protein_coding	protein_coding	protein_coding,retained_intron	NA	NA	NA
ENSMUSG00000030004	Nat8	7.36e-13	-3.1805	protein_coding	protein_coding	protein_coding	NA	NA	NA
ENSMUSG00000027820	Mme	4.48e-08	-3.17654	protein_coding	protein_coding	protein_coding,retained_intron	NA	NA	NA
ENSMUSG00000029595	Lhx5	0.0208947	-3.16136	protein_coding	protein_coding	protein_coding	NA	NA	NA
ENSMUSG00000022947	Cbr3	0.000806041	-3.14807	protein_coding	protein_coding	protein_coding	NA	NA	NA
ENSMUSG00000079550	Mpp4	3.92e-05	-3.14038	protein_coding	protein_coding	protein_coding,processed_transcript,retained_intron	NA	NA	NA
ENSMUSG00000028158	Mttp	2.56e-16	-3.13413	protein_coding	protein_coding	protein_coding,retained_intron	NA	NA	NA
ENSMUSG00000089669	Tnfsf13	3.28e-12	-3.13066	protein_coding	protein_coding	protein_coding	NA	NA	NA
ENSMUSG00000020000	Moxd1	7.53e-19	-3.13017	protein_coding	protein_coding	protein_coding,processed_transcript	NA	NA	NA
ENSMUSG00000030769	Slc5a11	3.97e-07	-3.11397	protein_coding	protein_coding	protein_coding,processed_transcript	NA	NA	NA
ENSMUSG00000066026	Dhrs3	4.61e-09	-3.10986	protein_coding	protein_coding	protein_coding,processed_transcript,nonsense_mediated_decay,retained_intron	NA	NA	NA
ENSMUSG00000078664	Sprr2a1	1.17e-07	-3.10687	protein_coding	protein_coding	protein_coding	NA	NA	NA
ENSMUSG00000034768	Asb16	4.02e-11	-3.10358	protein_coding	protein_coding	protein_coding	NA	NA	NA
ENSMUSG00000058216	Gstp3	1.14e-07	-3.10317	protein_coding	protein_coding	protein_coding	NA	NA	NA
ENSMUSG00000074715	Ccl28	3.76e-25	-3.09332	protein_coding	protein_coding	protein_coding	NA	NA	NA
ENSMUSG00000027954	Efna1	3.54e-08	-3.08655	protein_coding	protein_coding	protein_coding	NA	NA	NA
ENSMUSG00000041741	Pde3a	3.14e-49	-3.08309	protein_coding	protein_coding	protein_coding,retained_intron	NA	NA	NA
ENSMUSG00000028519	Dab1	3.2e-42	-3.07288	protein_coding	protein_coding	processed_transcript,protein_coding,nonsense_mediated_decay	NA	NA	NA
ENSMUSG00000032038	St3gal4	2.21e-10	-3.07233	protein_coding	protein_coding	protein_coding	NA	NA	NA
ENSMUSG00000103711	Tstd1	3.79e-14	-3.07103	protein_coding	protein_coding	processed_transcript,protein_coding,retained_intron	NA	NA	NA
ENSMUSG00000096546	Smlr1	4.18e-10	-3.06685	protein_coding	protein_coding	protein_coding,retained_intron	NA	NA	NA
ENSMUSG00000031557	Plekha2	1.86e-16	-3.06599	protein_coding	protein_coding	protein_coding,processed_transcript	NA	NA	NA
ENSMUSG00000074207	Adh1	7.57e-10	-3.05968	protein_coding	protein_coding	processed_transcript,protein_coding,retained_intron,nonsense_mediated_decay	NA	NA	NA
ENSMUSG00000002565	Scin	1.29e-11	-3.0584	protein_coding	protein_coding	protein_coding	NA	NA	NA
ENSMUSG00000031637	Lrp2bp	1.23e-08	-3.04261	protein_coding	protein_coding	protein_coding,nonsense_mediated_decay,retained_intron	NA	NA	NA
ENSMUSG00000062638	Btnl1	8.76e-20	-3.04046	protein_coding	protein_coding	protein_coding	NA	NA	NA
ENSMUSG00000020150	Gamt	3.76e-07	-3.0378	protein_coding	protein_coding	protein_coding,retained_intron	NA	NA	NA
ENSMUSG00000030088	Aldh1l1	5.71e-11	-3.028	protein_coding	protein_coding	processed_transcript,protein_coding,nonsense_mediated_decay,retained_intron	NA	NA	NA
ENSMUSG00000024899	Papss2	6.45e-11	-3.02466	protein_coding	protein_coding	protein_coding	NA	NA	NA
ENSMUSG00000070390	Nlrp1b	1.03e-26	-3.02389	protein_coding	protein_coding	protein_coding,nonsense_mediated_decay	NA	NA	NA
ENSMUSG00000027452	Acss1	9.66e-41	-3.01356	protein_coding	protein_coding	protein_coding,processed_transcript,retained_intron	NA	NA	NA
ENSMUSG00000072571	Tmem253	6.55e-07	-3.00892	protein_coding	protein_coding	protein_coding	NA	NA	NA
ENSMUSG00000032454	Rbp2	5.7e-07	-3.00867	protein_coding	protein_coding	protein_coding,processed_transcript	NA	NA	NA
ENSMUSG00000031725	Ces1f	1.7e-05	-3.00658	protein_coding	protein_coding	protein_coding,retained_intron,nonsense_mediated_decay	NA	NA	NA
ENSMUSG00000029436	Mmp17	5e-09	-3.00111	protein_coding	protein_coding	protein_coding,retained_intron	NA	NA	NA
ENSMUSG00000005677	Nr1i3	1.39e-12	-2.99345	protein_coding	protein_coding	protein_coding,retained_intron,nonsense_mediated_decay	NA	NA	NA
ENSMUSG00000011034	Slc5a1	1.44e-08	-2.9933	protein_coding	protein_coding	protein_coding	NA	NA	NA
ENSMUSG00000032500	Dclk3	7.22e-07	-2.98199	protein_coding	protein_coding	protein_coding	NA	NA	NA
ENSMUSG00000020814	Mxra7	1.4e-09	-2.9811	protein_coding	protein_coding	protein_coding,nonsense_mediated_decay	NA	NA	NA
ENSMUSG00000079440	Alpi	7.6e-08	-2.98005	protein_coding	protein_coding	protein_coding	NA	NA	NA
ENSMUSG00000060550	H2-Q7	7.2e-07	-2.97974	protein_coding	protein_coding	protein_coding,retained_intron	NA	NA	NA
ENSMUSG00000032066	Bco2	7.37e-13	-2.97213	protein_coding	protein_coding	protein_coding	NA	NA	NA
ENSMUSG00000073421	H2-Ab1	0.000150918	-2.97127	protein_coding	protein_coding	protein_coding,retained_intron	NA	NA	NA
ENSMUSG00000067724	Gbx1	0.000623451	-2.967	protein_coding	protein_coding	protein_coding	NA	NA	NA
ENSMUSG00000059213	Ddn	9.81e-05	-2.96644	protein_coding	protein_coding	protein_coding	NA	NA	NA
ENSMUSG00000053862	Slc51b	1.4e-05	-2.96432	protein_coding	protein_coding	protein_coding	NA	NA	NA
ENSMUSG00000048373	Fgfbp1	1.04e-13	-2.96218	protein_coding	protein_coding	protein_coding	NA	NA	NA
ENSMUSG00000074445	Sprr2a3	0.000258915	-2.95898	protein_coding	protein_coding	protein_coding	NA	NA	NA
ENSMUSG00000047963	Stbd1	0.00545783	-2.95222	protein_coding	protein_coding	protein_coding,nonsense_mediated_decay	NA	NA	NA
ENSMUSG00000018906	P4ha2	1.8e-08	-2.95044	protein_coding	protein_coding	protein_coding,retained_intron,nonsense_mediated_decay,processed_transcript	NA	NA	NA
ENSMUSG00000040147	Maob	1.24e-16	-2.94791	protein_coding	protein_coding	protein_coding,nonsense_mediated_decay	NA	NA	NA
ENSMUSG00000022235	Cmbl	4.1e-09	-2.93966	protein_coding	protein_coding	protein_coding	NA	NA	NA
ENSMUSG00000035041	Creb3l3	1.95e-13	-2.93797	protein_coding	protein_coding	protein_coding,retained_intron,processed_transcript	NA	NA	NA
ENSMUSG00000029862	Clcn1	3.04e-05	-2.93359	protein_coding	protein_coding	protein_coding,nonsense_mediated_decay,processed_transcript,retained_intron	NA	NA	NA
ENSMUSG00000056162	Cndp1	1.59e-15	-2.93359	protein_coding	protein_coding	protein_coding,retained_intron	NA	NA	NA
ENSMUSG00000074195	Clca4b	2.37e-33	-2.92792	protein_coding	protein_coding	protein_coding	NA	NA	NA
ENSMUSG00000039114	Nrn1	0.000160904	-2.92785	protein_coding	protein_coding	protein_coding	NA	NA	NA
ENSMUSG00000023235	Ccl25	6.58e-23	-2.9166	protein_coding	protein_coding	nonsense_mediated_decay,non_stop_decay,protein_coding,retained_intron,processed_transcript	NA	NA	NA
ENSMUSG00000074261	Erich4	1.55e-08	-2.91476	protein_coding	protein_coding	protein_coding	NA	NA	NA
ENSMUSG00000064247	Plcxd1	0.000543901	-2.9105	protein_coding	protein_coding	protein_coding,nonsense_mediated_decay,processed_transcript	NA	NA	NA
ENSMUSG00000011008	Mcoln2	1.14e-16	-2.90796	protein_coding	protein_coding	protein_coding,retained_intron	NA	NA	NA
ENSMUSG00000094447	9430069I07Rik	1.28e-05	-2.9076	protein_coding	protein_coding	protein_coding	NA	NA	NA
ENSMUSG00000029847	Slc23a4	5.14e-30	-2.89534	protein_coding	protein_coding	protein_coding,processed_transcript	NA	NA	NA
ENSMUSG00000020681	Ace	2.52e-06	-2.88386	protein_coding	protein_coding	protein_coding,processed_transcript	NA	NA	NA
ENSMUSG00000051497	Kcnj16	0.00201054	-2.88242	protein_coding	protein_coding	protein_coding	NA	NA	NA
ENSMUSG00000042429	Adora1	4.49e-10	-2.88115	protein_coding	protein_coding	protein_coding	NA	NA	NA
ENSMUSG00000053783	1700016K19Rik	1.18e-05	-2.87211	protein_coding	protein_coding	protein_coding	NA	NA	NA
ENSMUSG00000027978	Prss12	1.6e-22	-2.86587	protein_coding	protein_coding	protein_coding	NA	NA	NA
ENSMUSG00000031558	Slit2	1.68e-12	-2.86554	protein_coding	protein_coding	protein_coding,nonsense_mediated_decay,retained_intron,processed_transcript	NA	NA	NA
ENSMUSG00000060703	Cd302	6.69e-26	-2.86448	protein_coding	protein_coding	protein_coding	NA	NA	NA
ENSMUSG00000004540	Psg17	0.00116018	-2.86055	protein_coding	protein_coding	protein_coding	NA	NA	NA
ENSMUSG00000059493	Nhs	3.6e-15	-2.8484	protein_coding	protein_coding	protein_coding	NA	NA	NA
ENSMUSG00000000416	Cttnbp2	7.54e-05	-2.84587	protein_coding	protein_coding	retained_intron,protein_coding,nonsense_mediated_decay	NA	NA	NA
ENSMUSG00000020080	Hkdc1	1.29e-07	-2.84566	protein_coding	protein_coding	protein_coding,retained_intron	NA	NA	NA
ENSMUSG00000078439	Smim24	5.39e-07	-2.83305	protein_coding	protein_coding	protein_coding,processed_transcript	NA	NA	NA
ENSMUSG00000079484	Phyhd1	0.00183817	-2.82537	protein_coding	protein_coding	protein_coding,processed_transcript,nonsense_mediated_decay,retained_intron	NA	NA	NA
ENSMUSG00000028307	Aldob	1.07e-09	-2.81588	protein_coding	protein_coding	protein_coding,processed_transcript	NA	NA	NA
ENSMUSG00000056978	Hamp2	0.000573503	-2.80638	protein_coding	protein_coding	protein_coding	NA	NA	NA
ENSMUSG00000035273	Hpse	1.17e-10	-2.79701	protein_coding	protein_coding	protein_coding	NA	NA	NA
ENSMUSG00000053846	Lipg	3.77e-17	-2.79498	protein_coding	protein_coding	protein_coding	NA	NA	NA
ENSMUSG00000060961	Slc4a4	3.15e-15	-2.7949	protein_coding	protein_coding	protein_coding,processed_transcript	NA	NA	NA
ENSMUSG00000047875	Gpr157	1.49e-17	-2.78675	protein_coding	protein_coding	protein_coding	NA	NA	NA
ENSMUSG00000062070	Pgk1	9.55e-11	-2.78617	protein_coding	protein_coding	protein_coding,nonsense_mediated_decay,retained_intron	NA	NA	NA
ENSMUSG00000022755	Adgrg7	5.08e-52	-2.78444	protein_coding	protein_coding	protein_coding	NA	NA	NA
ENSMUSG00000045667	Smtnl2	0.00395349	-2.77805	protein_coding	protein_coding	protein_coding,processed_transcript	NA	NA	NA
ENSMUSG00000025608	Podxl	1.24e-05	-2.77726	protein_coding	protein_coding	protein_coding,processed_transcript	NA	NA	NA
ENSMUSG00000051067	Lingo3	0.00397971	-2.77199	protein_coding	protein_coding	protein_coding	NA	NA	NA
ENSMUSG00000026784	Pdss1	4.35e-26	-2.77193	protein_coding	protein_coding	protein_coding,processed_transcript,nonsense_mediated_decay,retained_intron	NA	NA	NA
ENSMUSG00000063229	Ldha	9.18e-16	-2.76155	protein_coding	protein_coding	protein_coding,retained_intron,nonsense_mediated_decay	NA	NA	NA
ENSMUSG00000028088	Fmo5	3.92e-12	-2.7593	protein_coding	protein_coding	protein_coding,retained_intron,processed_transcript	NA	NA	NA
ENSMUSG00000001604	Tcea3	1.4e-18	-2.75512	protein_coding	protein_coding	processed_transcript,protein_coding	NA	NA	NA
ENSMUSG00000029269	Sult1b1	1.27e-08	-2.75179	protein_coding	protein_coding	protein_coding	NA	NA	NA
ENSMUSG00000049588	Ccdc69	5.05e-09	-2.75177	protein_coding	protein_coding	protein_coding	NA	NA	NA
ENSMUSG00000038079	Tmem237	0.000331937	-2.75148	protein_coding	protein_coding	protein_coding,retained_intron	NA	NA	NA
ENSMUSG00000049871	Nlrc3	6.51e-08	-2.74842	protein_coding	protein_coding	protein_coding,retained_intron	NA	NA	NA
ENSMUSG00000036151	Tm6sf2	1.71e-08	-2.74626	protein_coding	protein_coding	protein_coding,retained_intron	NA	NA	NA
ENSMUSG00000022383	Ppara	3.95e-15	-2.74594	protein_coding	protein_coding	processed_transcript,protein_coding	NA	NA	NA
ENSMUSG00000029811	Aoc1	7.62e-11	-2.74466	protein_coding	protein_coding	protein_coding,retained_intron	NA	NA	NA
ENSMUSG00000058624	Gda	0.000190452	-2.74282	protein_coding	protein_coding	protein_coding,retained_intron	NA	NA	NA
ENSMUSG00000003420	Fcgrt	4.49e-07	-2.73474	protein_coding	protein_coding	protein_coding,retained_intron	NA	NA	NA
ENSMUSG00000027359	Slc27a2	1.74e-34	-2.72705	protein_coding	protein_coding	protein_coding,processed_transcript	NA	NA	NA
ENSMUSG00000035780	Ugt2a3	2.18e-11	-2.72049	protein_coding	protein_coding	protein_coding	NA	NA	NA
ENSMUSG00000094651	Gal3st2	1.64e-11	-2.70724	protein_coding	protein_coding	processed_transcript,protein_coding	NA	NA	NA
ENSMUSG00000035429	Ptprh	2.14e-07	-2.70295	protein_coding	protein_coding	protein_coding,nonsense_mediated_decay,retained_intron,processed_transcript	NA	NA	NA
ENSMUSG00000036123	Slc9a3	3.67e-07	-2.69955	protein_coding	protein_coding	protein_coding	NA	NA	NA
ENSMUSG00000010651	Acaa1b	1.44e-06	-2.69607	protein_coding	protein_coding	protein_coding,retained_intron	NA	NA	NA
ENSMUSG00000045281	Gpr20	4.06e-06	-2.69542	protein_coding	protein_coding	protein_coding	NA	NA	NA
ENSMUSG00000061531	Tmem236	7.4e-17	-2.69265	protein_coding	protein_coding	protein_coding	NA	NA	NA
ENSMUSG00000023122	Sult1c2	0.00186655	-2.68581	protein_coding	protein_coding	protein_coding	NA	NA	NA
ENSMUSG00000022479	Vdr	9.68e-26	-2.67651	protein_coding	protein_coding	protein_coding,retained_intron	NA	NA	NA
ENSMUSG00000038670	Mybpc2	0.00051473	-2.67297	protein_coding	protein_coding	protein_coding	NA	NA	NA
ENSMUSG00000023070	Rgn	3.87e-11	-2.67213	protein_coding	protein_coding	protein_coding	NA	NA	NA
ENSMUSG00000040740	Slc25a34	7.74e-08	-2.6721	protein_coding	protein_coding	protein_coding	NA	NA	NA
ENSMUSG00000030865	Chp2	5.32e-09	-2.67062	protein_coding	protein_coding	protein_coding,processed_transcript	NA	NA	NA
ENSMUSG00000027068	Dhrs9	7.7e-08	-2.66956	protein_coding	protein_coding	protein_coding	NA	NA	NA
ENSMUSG00000036500	Akp3	0.000772129	-2.66853	protein_coding	protein_coding	retained_intron,protein_coding	NA	NA	NA
ENSMUSG00000075610	Tmem92	2.81e-16	-2.66533	protein_coding	protein_coding	protein_coding,nonsense_mediated_decay	NA	NA	NA
ENSMUSG00000025791	Pgm2	1.08e-11	-2.66308	protein_coding	protein_coding	protein_coding	NA	NA	NA
ENSMUSG00000008540	Mgst1	1.12e-11	-2.66172	protein_coding	protein_coding	protein_coding	NA	NA	NA
ENSMUSG00000030793	Pycard	8.18e-24	-2.66077	protein_coding	protein_coding	protein_coding	NA	NA	NA
ENSMUSG00000038298	Pdzk1	0.000117103	-2.64569	protein_coding	protein_coding	protein_coding,nonsense_mediated_decay	NA	NA	NA
ENSMUSG00000006360	Crip1	9.72e-08	-2.64253	protein_coding	protein_coding	processed_transcript,protein_coding,retained_intron	NA	NA	NA
ENSMUSG00000054150	Syne3	2.97e-09	-2.64198	protein_coding	protein_coding	protein_coding	NA	NA	NA
ENSMUSG00000032105	Pdzd3	9.63e-17	-2.63846	protein_coding	protein_coding	protein_coding,processed_transcript	NA	NA	NA
ENSMUSG00000043592	Unc5cl	2.23e-28	-2.63678	protein_coding	protein_coding	protein_coding,nonsense_mediated_decay	NA	NA	NA
ENSMUSG00000070704	Ugt2b36	2.55e-10	-2.63214	protein_coding	protein_coding	protein_coding,retained_intron	NA	NA	NA
ENSMUSG00000031444	F10	0.000296625	-2.63091	protein_coding	protein_coding	protein_coding	NA	NA	NA
ENSMUSG00000050737	Ptges	0.0472768	-2.62943	protein_coding	protein_coding	protein_coding,processed_transcript	NA	NA	NA
ENSMUSG00000038527	C1rl	0.000418646	-2.62762	protein_coding	protein_coding	protein_coding	NA	NA	NA
ENSMUSG00000029814	Igf2bp3	3.68e-05	-2.62699	protein_coding	protein_coding	protein_coding,retained_intron,processed_transcript	NA	NA	NA
ENSMUSG00000068587	Mgam	3.48e-14	-2.62308	protein_coding	protein_coding	protein_coding,processed_transcript	NA	NA	NA
ENSMUSG00000020277	Pfkl	1.55e-10	-2.61898	protein_coding	protein_coding	protein_coding,retained_intron,processed_transcript	NA	NA	NA
ENSMUSG00000033854	Kcnk10	1.78e-16	-2.60225	protein_coding	protein_coding	protein_coding	NA	NA	NA
ENSMUSG00000031891	Hsd11b2	3.53e-12	-2.59932	protein_coding	protein_coding	protein_coding	NA	NA	NA
ENSMUSG00000034528	Hsd17b13	6.75e-08	-2.59776	protein_coding	protein_coding	protein_coding	NA	NA	NA
ENSMUSG00000078350	Smim1	0.00233303	-2.59768	protein_coding	protein_coding	protein_coding,processed_transcript	NA	NA	NA
ENSMUSG00000054932	Afp	5.84e-08	-2.59748	protein_coding	protein_coding	protein_coding,retained_intron	NA	NA	NA
ENSMUSG00000023959	Clic5	1.77e-09	-2.59335	protein_coding	protein_coding	protein_coding	NA	NA	NA
ENSMUSG00000078653	Cntd1	9.74e-06	-2.59145	protein_coding	protein_coding	processed_transcript,protein_coding	NA	NA	NA
ENSMUSG00000074628	Tldc2	4.34e-07	-2.58908	protein_coding	protein_coding	protein_coding	NA	NA	NA
ENSMUSG00000050592	Fam78a	4.55e-13	-2.5856	protein_coding	protein_coding	nonsense_mediated_decay,protein_coding,processed_transcript	NA	NA	NA
ENSMUSG00000041696	Rasl12	5.14e-05	-2.58536	protein_coding	protein_coding	nonsense_mediated_decay,protein_coding,retained_intron	NA	NA	NA
ENSMUSG00000026398	Nr5a2	3.46e-30	-2.58102	protein_coding	protein_coding	protein_coding,retained_intron	NA	NA	NA
ENSMUSG00000039814	Xkr5	3.92e-12	-2.57932	protein_coding	protein_coding	protein_coding,processed_transcript,nonsense_mediated_decay	NA	NA	NA
ENSMUSG00000032289	Thsd4	1.78e-22	-2.57792	protein_coding	protein_coding	protein_coding,retained_intron,processed_transcript	NA	NA	NA
ENSMUSG00000003949	Hlf	0.00304932	-2.57294	protein_coding	protein_coding	protein_coding,processed_transcript	NA	NA	NA
ENSMUSG00000017390	Aldoc	9.53e-05	-2.57246	protein_coding	protein_coding	protein_coding,retained_intron,processed_transcript	NA	NA	NA
ENSMUSG00000048217	Nags	8.84e-21	-2.57069	protein_coding	protein_coding	processed_transcript,protein_coding	NA	NA	NA
ENSMUSG00000027377	Mall	2.45e-07	-2.56501	protein_coding	protein_coding	protein_coding	NA	NA	NA
ENSMUSG00000066952	Myo1h	0.00159772	-2.56054	protein_coding	protein_coding	protein_coding,retained_intron,processed_transcript	NA	NA	NA
ENSMUSG00000109764	Klkb1	0.0292224	-2.55718	protein_coding	protein_coding	protein_coding	NA	NA	NA
ENSMUSG00000026395	Ptprc	0.0053387	-2.55666	protein_coding	protein_coding	retained_intron,protein_coding	NA	NA	NA
ENSMUSG00000057880	Abat	2.44e-11	-2.55545	protein_coding	protein_coding	protein_coding,retained_intron,processed_transcript	NA	NA	NA
ENSMUSG00000079507	H2-Q1	1.72e-06	-2.55421	protein_coding	protein_coding	retained_intron,protein_coding	NA	NA	NA
ENSMUSG00000036216	Leap2	6.11e-06	-2.55352	protein_coding	protein_coding	protein_coding	NA	NA	NA
ENSMUSG00000029330	Cds1	3.12e-24	-2.5496	protein_coding	protein_coding	protein_coding,retained_intron	NA	NA	NA
ENSMUSG00000040345	Arhgap9	5.56e-05	-2.54749	protein_coding	protein_coding	protein_coding	NA	NA	NA
ENSMUSG00000033715	Akr1c14	1.34e-09	-2.54348	protein_coding	protein_coding	protein_coding,processed_transcript	NA	NA	NA
ENSMUSG00000017688	Hnf4g	5.25e-10	-2.53516	protein_coding	protein_coding	protein_coding	NA	NA	NA
ENSMUSG00000096606	Tpbgl	0.00749161	-2.5229	protein_coding	protein_coding	protein_coding	NA	NA	NA
ENSMUSG00000022546	Gpt	3.85e-06	-2.52216	protein_coding	protein_coding	protein_coding	NA	NA	NA
ENSMUSG00000046160	Olig1	0.0186753	-2.51613	protein_coding	protein_coding	protein_coding	NA	NA	NA
ENSMUSG00000023800	Tiam2	2.38e-19	-2.50668	protein_coding	protein_coding	protein_coding	NA	NA	NA
ENSMUSG00000111590	OR4P4	0.00504594	-2.5006	protein_coding	protein_coding	processed_transcript,protein_coding	NA	NA	NA
ENSMUSG00000027790	Sis	1.42e-08	-2.49928	protein_coding	protein_coding	protein_coding,retained_intron	NA	NA	NA
ENSMUSG00000021803	Cdhr1	0.00012997	-2.49883	protein_coding	protein_coding	protein_coding	NA	NA	NA
ENSMUSG00000025396	Hsd17b6	1e-10	-2.49434	protein_coding	protein_coding	protein_coding	NA	NA	NA
ENSMUSG00000022836	Mylk	1.53e-08	-2.4937	protein_coding	protein_coding	retained_intron,protein_coding	NA	NA	NA
ENSMUSG00000025348	Itga7	0.030636	-2.49126	protein_coding	protein_coding	protein_coding	NA	NA	NA
ENSMUSG00000021553	Slc28a3	2.19e-10	-2.49078	protein_coding	protein_coding	nonsense_mediated_decay,protein_coding,retained_intron	NA	NA	NA
ENSMUSG00000054128	H2-T3	1.43e-14	-2.49029	protein_coding	protein_coding	protein_coding,retained_intron,nonsense_mediated_decay	NA	NA	NA
ENSMUSG00000073402	Gm8909	3.04e-12	-2.48671	protein_coding	protein_coding	protein_coding,processed_transcript	NA	NA	NA
ENSMUSG00000021684	Pde8b	4.79e-12	-2.48571	protein_coding	protein_coding	protein_coding,processed_transcript,retained_intron	NA	NA	NA
ENSMUSG00000022555	Dgat1	2.13e-08	-2.47964	protein_coding	protein_coding	protein_coding,retained_intron,nonsense_mediated_decay	NA	NA	NA
ENSMUSG00000022040	Ephx2	7.87e-16	-2.47016	protein_coding	protein_coding	protein_coding	NA	NA	NA
ENSMUSG00000031762	Mt2	4.76e-14	-2.46223	protein_coding	protein_coding	protein_coding	NA	NA	NA
ENSMUSG00000028337	Coro2a	5.35e-10	-2.45915	protein_coding	protein_coding	protein_coding,processed_transcript,retained_intron	NA	NA	NA
ENSMUSG00000040170	Fmo2	0.000300265	-2.45805	protein_coding	protein_coding	protein_coding,retained_intron,processed_transcript	NA	NA	NA
ENSMUSG00000014361	Mertk	2.92e-12	-2.45717	protein_coding	protein_coding	protein_coding,processed_transcript	NA	NA	NA
ENSMUSG00000030155	Clec2e	1.2e-05	-2.45597	protein_coding	protein_coding	protein_coding	NA	NA	NA
ENSMUSG00000018554	Ybx2	5.63e-05	-2.45224	protein_coding	protein_coding	protein_coding,retained_intron	NA	NA	NA
ENSMUSG00000031845	Bco1	2.34e-05	-2.44875	protein_coding	protein_coding	protein_coding	NA	NA	NA
ENSMUSG00000033308	Dpyd	6.31e-20	-2.43926	protein_coding	protein_coding	protein_coding,retained_intron	NA	NA	NA
ENSMUSG00000027296	Itpka	2.85e-08	-2.43625	protein_coding	protein_coding	protein_coding	NA	NA	NA
ENSMUSG00000031482	Slc25a15	6.45e-19	-2.43442	protein_coding	protein_coding	protein_coding,retained_intron	NA	NA	NA
ENSMUSG00000052396	Mogat2	5.89e-08	-2.42324	protein_coding	protein_coding	protein_coding,processed_transcript	NA	NA	NA
ENSMUSG00000025652	Tmem89	0.00994663	-2.42173	protein_coding	protein_coding	protein_coding	NA	NA	NA
ENSMUSG00000043705	Capn13	4.78e-13	-2.41465	protein_coding	protein_coding	protein_coding	NA	NA	NA
ENSMUSG00000097643	A130051J06Rik	1.67e-10	-2.41004	protein_coding	protein_coding	protein_coding	NA	NA	NA
ENSMUSG00000046811	Gltpd2	3.4e-05	-2.40615	protein_coding	protein_coding	protein_coding	NA	NA	NA
ENSMUSG00000026617	Bpnt1	5.88e-09	-2.40502	protein_coding	protein_coding	protein_coding,processed_transcript	NA	NA	NA
ENSMUSG00000037754	Ppp1r16b	2.72e-05	-2.40439	protein_coding	protein_coding	protein_coding,retained_intron	NA	NA	NA
ENSMUSG00000056666	Retsat	8.69e-11	-2.40271	protein_coding	protein_coding	protein_coding,processed_transcript	NA	NA	NA
ENSMUSG00000013083	2200002J24Rik	6.98e-08	-2.40157	protein_coding	protein_coding	lincRNA,protein_coding	NA	NA	NA
ENSMUSG00000051323	Pcdh19	0.00287117	-2.39701	protein_coding	protein_coding	protein_coding,nonsense_mediated_decay,processed_transcript	NA	NA	NA
ENSMUSG00000018752	Tnfsfm13	6.32e-09	-2.39545	protein_coding	protein_coding	protein_coding	NA	NA	NA
ENSMUSG00000020072	Pbld2	1.75e-12	-2.37693	protein_coding	protein_coding	protein_coding,retained_intron	NA	NA	NA
ENSMUSG00000094928	1700122O11Rik	0.0133713	-2.37566	protein_coding	protein_coding	protein_coding	NA	NA	NA
ENSMUSG00000036427	Gpi1	6.15e-05	-2.37513	protein_coding	protein_coding	protein_coding,retained_intron,nonsense_mediated_decay,processed_transcript	NA	NA	NA
ENSMUSG00000003955	Fam162a	1.27e-05	-2.36974	protein_coding	protein_coding	protein_coding	NA	NA	NA
ENSMUSG00000029167	Ppargc1a	0.000275786	-2.35917	protein_coding	protein_coding	protein_coding,nonsense_mediated_decay	NA	NA	NA
ENSMUSG00000024034	Tmprss3	0.0125611	-2.35909	protein_coding	protein_coding	protein_coding	NA	NA	NA
ENSMUSG00000037390	Muc3	0.022703	-2.35278	protein_coding	protein_coding	protein_coding,processed_transcript	NA	NA	NA
ENSMUSG00000063524	Eno1	2.07e-06	-2.34861	protein_coding	protein_coding	protein_coding,retained_intron	NA	NA	NA
ENSMUSG00000018334	Ksr1	2.32e-16	-2.34789	protein_coding	protein_coding	protein_coding	NA	NA	NA
ENSMUSG00000011589	Fsd1	0.000129853	-2.34431	protein_coding	protein_coding	protein_coding	NA	NA	NA
ENSMUSG00000074259	Gramd2	1.35e-16	-2.33797	protein_coding	protein_coding	protein_coding,retained_intron	NA	NA	NA
ENSMUSG00000020303	Stc2	0.000156374	-2.33761	protein_coding	protein_coding	protein_coding,processed_transcript	NA	NA	NA
ENSMUSG00000058435	Btnl4	9.44e-14	-2.33744	protein_coding	protein_coding	protein_coding	NA	NA	NA
ENSMUSG00000057074	Ces1g	0.00650706	-2.33706	protein_coding	protein_coding	protein_coding	NA	NA	NA
ENSMUSG00000004558	Ndrg2	1.94e-06	-2.33651	protein_coding	protein_coding	protein_coding	NA	NA	NA
ENSMUSG00000024503	Spink1	1.73e-06	-2.33569	protein_coding	protein_coding	protein_coding	NA	NA	NA
ENSMUSG00000060268	Gm1661	0.0441097	-2.33188	protein_coding	protein_coding	protein_coding,processed_transcript	NA	NA	NA
ENSMUSG00000023456	Tpi1	2.14e-10	-2.32528	protein_coding	protein_coding	protein_coding,retained_intron	NA	NA	NA
ENSMUSG00000022847	Thpo	8.97e-07	-2.32183	protein_coding	protein_coding	protein_coding	NA	NA	NA
ENSMUSG00000047702	Olfr1388	2.86e-06	-2.32166	protein_coding	protein_coding	protein_coding	NA	NA	NA
ENSMUSG00000030492	Slc7a9	9.42e-07	-2.32111	protein_coding	protein_coding	protein_coding,retained_intron,nonsense_mediated_decay	NA	NA	NA
ENSMUSG00000023259	Slc26a6	1.75e-06	-2.32088	protein_coding	protein_coding	processed_transcript,protein_coding,nonsense_mediated_decay,retained_intron	NA	NA	NA
ENSMUSG00000015405	Ace2	4.12e-07	-2.31642	protein_coding	protein_coding	protein_coding	NA	NA	NA
ENSMUSG00000053219	Raet1e	1.44e-07	-2.31104	protein_coding	protein_coding	protein_coding	NA	NA	NA
ENSMUSG00000011148	Adssl1	0.00414802	-2.28595	protein_coding	protein_coding	protein_coding	NA	NA	NA
ENSMUSG00000041064	Pif1	1.34e-16	-2.28502	protein_coding	protein_coding	protein_coding,nonsense_mediated_decay,retained_intron	NA	NA	NA
ENSMUSG00000006642	Tcf23	2.76e-12	-2.28144	protein_coding	protein_coding	protein_coding	NA	NA	NA
ENSMUSG00000056133	Gm9992	2.07e-05	-2.28133	protein_coding	protein_coding	protein_coding	NA	NA	NA
ENSMUSG00000004654	Ghrhr	0.0035778	-2.27793	protein_coding	protein_coding	retained_intron,protein_coding	NA	NA	NA
ENSMUSG00000029369	Afm	0.0047633	-2.27321	protein_coding	protein_coding	protein_coding	NA	NA	NA
ENSMUSG00000020846	Rflnb	1.74e-10	-2.2668	protein_coding	protein_coding	protein_coding	NA	NA	NA
ENSMUSG00000045294	Insig1	1.38e-08	-2.26548	protein_coding	protein_coding	protein_coding,retained_intron	NA	NA	NA
ENSMUSG00000021221	Dpf3	4.85e-05	-2.26479	protein_coding	protein_coding	protein_coding	NA	NA	NA
ENSMUSG00000108931	Olfr1284	2.98e-07	-2.25564	protein_coding	protein_coding	protein_coding	NA	NA	NA
ENSMUSG00000021196	Pfkp	8.04e-09	-2.25549	protein_coding	protein_coding	protein_coding,retained_intron,nonsense_mediated_decay	NA	NA	NA
ENSMUSG00000043789	Vwce	7.21e-07	-2.25415	protein_coding	protein_coding	protein_coding	NA	NA	NA
ENSMUSG00000051517	Arhgef39	2.39e-06	-2.25362	protein_coding	protein_coding	protein_coding,processed_transcript	NA	NA	NA
ENSMUSG00000029630	Cyp3a25	2.07e-08	-2.24965	protein_coding	protein_coding	nonsense_mediated_decay,protein_coding,processed_transcript	NA	NA	NA
ENSMUSG00000024738	Pga5	0.000491318	-2.24932	protein_coding	protein_coding	protein_coding	NA	NA	NA
ENSMUSG00000034579	Pla2g3	7.16e-05	-2.24472	protein_coding	protein_coding	protein_coding,nonsense_mediated_decay,retained_intron	NA	NA	NA
ENSMUSG00000042251	Pm20d1	0.000330615	-2.24127	protein_coding	protein_coding	protein_coding,processed_transcript	NA	NA	NA
ENSMUSG00000027890	Gstm4	5.47e-05	-2.24085	protein_coding	protein_coding	protein_coding	NA	NA	NA
ENSMUSG00000110266	Gm32742	2.16e-06	-2.2404	protein_coding	protein_coding	protein_coding	NA	NA	NA
ENSMUSG00000021280	Exoc3l4	4.6e-05	-2.23287	protein_coding	protein_coding	protein_coding	NA	NA	NA
ENSMUSG00000019945	1700040L02Rik	1.28e-10	-2.23277	protein_coding	protein_coding	protein_coding	NA	NA	NA
ENSMUSG00000020447	Npc1l1	4.05e-05	-2.23104	protein_coding	protein_coding	protein_coding	NA	NA	NA
ENSMUSG00000032666	1700025G04Rik	3.14e-24	-2.22906	protein_coding	protein_coding	nonsense_mediated_decay,protein_coding,retained_intron	NA	NA	NA
ENSMUSG00000004038	Gstm3	0.00613451	-2.22904	protein_coding	protein_coding	protein_coding	NA	NA	NA
ENSMUSG00000042581	Thsd7b	0.0121854	-2.22817	protein_coding	protein_coding	retained_intron,protein_coding,processed_transcript	NA	NA	NA
ENSMUSG00000092618	Btnl6	0.00016976	-2.22749	protein_coding	protein_coding	unprocessed_pseudogene,protein_coding	NA	NA	NA
ENSMUSG00000094584	Ms4a18	4.14e-05	-2.22491	protein_coding	protein_coding	protein_coding	NA	NA	NA
ENSMUSG00000040808	S100g	0.000226823	-2.22342	protein_coding	protein_coding	protein_coding	NA	NA	NA
ENSMUSG00000024665	Fads2	1.6e-14	-2.21716	protein_coding	protein_coding	protein_coding	NA	NA	NA
ENSMUSG00000024960	Plcb3	3.53e-18	-2.21103	protein_coding	protein_coding	protein_coding	NA	NA	NA
ENSMUSG00000034449	Dhrs11	5.85e-08	-2.20802	protein_coding	protein_coding	protein_coding,nonsense_mediated_decay	NA	NA	NA
ENSMUSG00000039063	Echdc3	8.86e-09	-2.19817	protein_coding	protein_coding	protein_coding,processed_transcript,retained_intron	NA	NA	NA
ENSMUSG00000057666	Gapdh	6.75e-05	-2.1977	protein_coding	protein_coding	retained_intron,protein_coding,processed_transcript	NA	NA	NA
ENSMUSG00000022324	Matn2	4.96e-17	-2.19725	protein_coding	protein_coding	protein_coding	NA	NA	NA
ENSMUSG00000027984	Hadh	1.15e-10	-2.19635	protein_coding	protein_coding	protein_coding,retained_intron	NA	NA	NA
ENSMUSG00000039099	Wdr93	0.000343433	-2.194	protein_coding	protein_coding	protein_coding	NA	NA	NA
ENSMUSG00000025203	Scd2	4.24e-15	-2.19111	protein_coding	protein_coding	protein_coding	NA	NA	NA
ENSMUSG00000050777	Tmem37	2.59e-05	-2.18802	protein_coding	protein_coding	protein_coding	NA	NA	NA
ENSMUSG00000029084	Cd38	2.58e-29	-2.18796	protein_coding	protein_coding	protein_coding,retained_intron	NA	NA	NA
ENSMUSG00000093805	Gm9994	3.08e-05	-2.18431	protein_coding	protein_coding	protein_coding	NA	NA	NA
ENSMUSG00000073424	Cyp4f15	0.00478114	-2.17921	protein_coding	protein_coding	protein_coding,retained_intron,processed_transcript	NA	NA	NA
ENSMUSG00000021216	Tubal3	1.36e-12	-2.17862	protein_coding	protein_coding	protein_coding	NA	NA	NA
ENSMUSG00000044165	Bcl2l15	4.36e-11	-2.17532	protein_coding	protein_coding	protein_coding,processed_transcript	NA	NA	NA
ENSMUSG00000054342	Kcnn4	2.96e-05	-2.17181	protein_coding	protein_coding	protein_coding,retained_intron	NA	NA	NA
ENSMUSG00000073768	Olfr1330	0.00444448	-2.16542	protein_coding	protein_coding	processed_transcript,protein_coding	NA	NA	NA
ENSMUSG00000037994	Slc9b2	0.00323888	-2.15766	protein_coding	protein_coding	nonsense_mediated_decay,retained_intron,protein_coding	NA	NA	NA
ENSMUSG00000033871	Ppargc1b	3.38e-24	-2.14209	protein_coding	protein_coding	protein_coding,processed_transcript	NA	NA	NA
ENSMUSG00000024340	Btnl2	1.79e-09	-2.14045	protein_coding	protein_coding	protein_coding	NA	NA	NA
ENSMUSG00000049791	Fzd4	1.97e-11	-2.13983	protein_coding	protein_coding	protein_coding	NA	NA	NA
ENSMUSG00000071335	Mfsd4b3	7.04e-08	-2.1333	protein_coding	protein_coding	protein_coding	NA	NA	NA
ENSMUSG00000037936	Scarb1	4.87e-07	-2.12928	protein_coding	protein_coding	protein_coding,processed_transcript,retained_intron	NA	NA	NA
ENSMUSG00000020105	Lrig3	1.19e-29	-2.12666	protein_coding	protein_coding	protein_coding	NA	NA	NA
ENSMUSG00000028940	Hes2	0.000250978	-2.12496	protein_coding	protein_coding	protein_coding,processed_transcript	NA	NA	NA
ENSMUSG00000059824	Dbp	0.0368981	-2.12493	protein_coding	protein_coding	protein_coding,retained_intron	NA	NA	NA
ENSMUSG00000030934	Oat	7.7e-05	-2.12216	protein_coding	protein_coding	protein_coding	NA	NA	NA
ENSMUSG00000027420	Bfsp1	7.22e-09	-2.11725	protein_coding	protein_coding	protein_coding	NA	NA	NA
ENSMUSG00000055137	Sugct	0.00330771	-2.11654	protein_coding	protein_coding	protein_coding	NA	NA	NA
ENSMUSG00000021565	Slc6a19	1.04e-05	-2.11469	protein_coding	protein_coding	protein_coding,processed_transcript,retained_intron,nonsense_mediated_decay	NA	NA	NA
ENSMUSG00000022574	Naprt	4.69e-08	-2.11435	protein_coding	protein_coding	protein_coding	NA	NA	NA
ENSMUSG00000049555	Tmie	0.00242114	-2.11321	protein_coding	protein_coding	protein_coding,processed_transcript,retained_intron	NA	NA	NA
ENSMUSG00000026785	Pkn3	4.67e-06	-2.11084	protein_coding	protein_coding	protein_coding,retained_intron	NA	NA	NA
ENSMUSG00000070855	Olfr1116	0.000784029	-2.10877	protein_coding	protein_coding	protein_coding	NA	NA	NA
ENSMUSG00000037709	Fam13a	2.05e-17	-2.10874	protein_coding	protein_coding	protein_coding,processed_transcript,retained_intron	NA	NA	NA
ENSMUSG00000004415	Col26a1	0.0141795	-2.1053	protein_coding	protein_coding	protein_coding,retained_intron,processed_transcript	NA	NA	NA
ENSMUSG00000026415	Fcamr	0.0126203	-2.1023	protein_coding	protein_coding	protein_coding	NA	NA	NA
ENSMUSG00000032528	Vipr1	6.63e-11	-2.0971	protein_coding	protein_coding	protein_coding,processed_transcript,retained_intron	NA	NA	NA
ENSMUSG00000025701	Alox5	0.000350986	-2.09382	protein_coding	protein_coding	protein_coding,retained_intron,nonsense_mediated_decay,processed_transcript	NA	NA	NA
ENSMUSG00000079494	Nat8f5	4.17e-07	-2.09233	protein_coding	protein_coding	protein_coding	NA	NA	NA
ENSMUSG00000031163	Glod5	0.000530577	-2.09109	protein_coding	protein_coding	protein_coding	NA	NA	NA
ENSMUSG00000036832	Lpar3	0.0348286	-2.08781	protein_coding	protein_coding	protein_coding	NA	NA	NA
ENSMUSG00000042672	Dcst1	0.0351946	-2.08473	protein_coding	protein_coding	protein_coding,retained_intron,processed_transcript	NA	NA	NA
ENSMUSG00000110469	RP23-288O12.2	0.000829597	-2.07912	protein_coding	protein_coding	protein_coding	NA	NA	NA
ENSMUSG00000025528	2010106E10Rik	0.000105593	-2.07697	protein_coding	protein_coding	protein_coding	NA	NA	NA
ENSMUSG00000070661	Rnf186	2.07e-07	-2.06812	protein_coding	protein_coding	protein_coding	NA	NA	NA
ENSMUSG00000064140	Trim38	1.67e-05	-2.06481	protein_coding	protein_coding	protein_coding	NA	NA	NA
ENSMUSG00000054733	Msra	8.58e-16	-2.06315	protein_coding	protein_coding	protein_coding,retained_intron,processed_transcript	NA	NA	NA
ENSMUSG00000029314	Agpat9	7.12e-15	-2.06249	protein_coding	protein_coding	protein_coding	NA	NA	NA
ENSMUSG00000021947	Cryl1	1.19e-14	-2.06181	protein_coding	protein_coding	protein_coding	NA	NA	NA
ENSMUSG00000019916	P4ha1	0.000174135	-2.05998	protein_coding	protein_coding	protein_coding	NA	NA	NA
ENSMUSG00000005125	Ndrg1	2.47e-06	-2.05621	protein_coding	protein_coding	protein_coding,retained_intron,nonsense_mediated_decay	NA	NA	NA
ENSMUSG00000041831	Sytl3	0.000108611	-2.05545	protein_coding	protein_coding	processed_transcript,nonsense_mediated_decay,protein_coding,retained_intron	NA	NA	NA
ENSMUSG00000023092	Fhl1	0.026572	-2.05519	protein_coding	protein_coding	protein_coding,processed_transcript	NA	NA	NA
ENSMUSG00000018909	Arrb1	2.34e-10	-2.05328	protein_coding	protein_coding	protein_coding,processed_transcript,retained_intron	NA	NA	NA
ENSMUSG00000031712	Il15	1.03e-05	-2.05166	protein_coding	protein_coding	protein_coding,nonsense_mediated_decay,processed_transcript	NA	NA	NA
ENSMUSG00000020600	Slc7a15	0.000274195	-2.04866	protein_coding	protein_coding	protein_coding,processed_transcript	NA	NA	NA
ENSMUSG00000055172	C1ra	0.000156031	-2.04542	protein_coding	protein_coding	protein_coding	NA	NA	NA
ENSMUSG00000040706	Agmat	3.64e-11	-2.04529	protein_coding	protein_coding	protein_coding	NA	NA	NA
ENSMUSG00000028976	Slc2a5	1.32e-07	-2.04488	protein_coding	protein_coding	protein_coding,processed_transcript,retained_intron	NA	NA	NA
ENSMUSG00000025198	Erlin1	8.19e-17	-2.04346	protein_coding	protein_coding	protein_coding,nonsense_mediated_decay,retained_intron	NA	NA	NA
ENSMUSG00000039166	Akap7	1.75e-23	-2.04089	protein_coding	protein_coding	protein_coding,processed_transcript	NA	NA	NA
ENSMUSG00000046589	Lrrc8e	0.000139641	-2.03485	protein_coding	protein_coding	protein_coding	NA	NA	NA
ENSMUSG00000029700	Slc13a1	2.9e-06	-2.03306	protein_coding	protein_coding	protein_coding,processed_transcript,retained_intron	NA	NA	NA
ENSMUSG00000011752	Pgam1	5.59e-08	-2.03087	protein_coding	protein_coding	protein_coding	NA	NA	NA
ENSMUSG00000022652	Morc1	0.00458913	-2.03004	protein_coding	protein_coding	protein_coding	NA	NA	NA
ENSMUSG00000042010	Acacb	2.17e-07	-2.02557	protein_coding	protein_coding	protein_coding,retained_intron	NA	NA	NA
ENSMUSG00000021974	Fgf9	0.000426069	-2.019	protein_coding	protein_coding	protein_coding	NA	NA	NA
ENSMUSG00000033278	Ptprm	3.8e-06	-2.01065	protein_coding	protein_coding	protein_coding	NA	NA	NA
ENSMUSG00000001663	Gstt1	3.54e-09	-2.00488	protein_coding	protein_coding	protein_coding	NA	NA	NA
ENSMUSG00000099032	Tcf24	0.00489487	-2.00464	protein_coding	protein_coding	protein_coding	NA	NA	NA
ENSMUSG00000038704	Aspdh	0.00125313	-2.0018	protein_coding	protein_coding	protein_coding,nonsense_mediated_decay,retained_intron,TEC	NA	NA	NA
ENSMUSG00000045775	Slc16a5	2.76e-05	-2.00154	protein_coding	protein_coding	protein_coding,processed_transcript,retained_intron	NA	NA	NA
ENSMUSG00000024424	Ttc39c	1.04e-19	-1.99732	protein_coding	protein_coding	protein_coding,retained_intron	NA	NA	NA
ENSMUSG00000073413	Ly6g6d	0.00109355	-1.99623	protein_coding	protein_coding	protein_coding,processed_transcript,retained_intron	NA	NA	NA
ENSMUSG00000054474	Thnsl2	1.2e-14	-1.99006	protein_coding	protein_coding	protein_coding,processed_transcript	NA	NA	NA
ENSMUSG00000024664	Fads3	1.31e-09	-1.98936	protein_coding	protein_coding	protein_coding	NA	NA	NA
ENSMUSG00000005360	Slc1a3	5.89e-08	-1.98837	protein_coding	protein_coding	protein_coding,retained_intron,processed_transcript	NA	NA	NA
ENSMUSG00000055301	Adh7	0.00451477	-1.98434	protein_coding	protein_coding	protein_coding,retained_intron,processed_transcript	NA	NA	NA
ENSMUSG00000096808	AC132444.6	0.00714346	-1.98181	protein_coding	protein_coding	protein_coding	NA	NA	NA
ENSMUSG00000027605	Acss2	1.48e-05	-1.97899	protein_coding	protein_coding	protein_coding,retained_intron,nonsense_mediated_decay,processed_transcript	NA	NA	NA
ENSMUSG00000062175	Tgif2	0.000110146	-1.97356	protein_coding	protein_coding	protein_coding,nonsense_mediated_decay,processed_transcript	NA	NA	NA
ENSMUSG00000022445	Cyp2d26	8.72e-07	-1.9731	protein_coding	protein_coding	protein_coding	NA	NA	NA
ENSMUSG00000062480	Acat3	0.0265607	-1.97293	protein_coding	protein_coding	protein_coding,retained_intron	NA	NA	NA
ENSMUSG00000026483	Fam129a	8.38e-05	-1.97221	protein_coding	protein_coding	protein_coding,nonsense_mediated_decay,processed_transcript	NA	NA	NA
ENSMUSG00000025557	Slc15a1	6.61e-07	-1.97196	protein_coding	protein_coding	protein_coding	NA	NA	NA
ENSMUSG00000015224	Cyp2j9	1.17e-05	-1.96977	protein_coding	protein_coding	protein_coding,retained_intron	NA	NA	NA
ENSMUSG00000060508	Nlrp9b	0.0136338	-1.96766	protein_coding	protein_coding	protein_coding	NA	NA	NA
ENSMUSG00000042195	Slc35f2	3.73e-09	-1.96639	protein_coding	protein_coding	protein_coding,retained_intron	NA	NA	NA
ENSMUSG00000079057	Cyp4v3	1.46e-06	-1.96516	protein_coding	protein_coding	protein_coding	NA	NA	NA
ENSMUSG00000000732	Icosl	5.95e-06	-1.96121	protein_coding	protein_coding	protein_coding	NA	NA	NA
ENSMUSG00000050721	Plekho2	0.000201689	-1.96026	protein_coding	protein_coding	processed_transcript,protein_coding	NA	NA	NA
ENSMUSG00000026227	2810459M11Rik	1.15e-21	-1.95796	protein_coding	protein_coding	protein_coding	NA	NA	NA
ENSMUSG00000030695	Aldoa	0.000637346	-1.95534	protein_coding	protein_coding	protein_coding,processed_transcript,retained_intron,nonsense_mediated_decay	NA	NA	NA
ENSMUSG00000033307	Mif	0.00134222	-1.94994	protein_coding	protein_coding	protein_coding	NA	NA	NA
ENSMUSG00000045005	Fzd5	2.62e-11	-1.94926	protein_coding	protein_coding	protein_coding	NA	NA	NA
ENSMUSG00000021831	Ero1l	0.000106645	-1.94867	protein_coding	protein_coding	protein_coding	NA	NA	NA
ENSMUSG00000014164	Klhl3	0.00013106	-1.94692	protein_coding	protein_coding	protein_coding	NA	NA	NA
ENSMUSG00000021604	Irx4	0.00116617	-1.94602	protein_coding	protein_coding	protein_coding	NA	NA	NA
ENSMUSG00000067571	Ms4a15	0.020713	-1.94082	protein_coding	protein_coding	protein_coding	NA	NA	NA
ENSMUSG00000075543	Urad	0.000697226	-1.93911	protein_coding	protein_coding	protein_coding	NA	NA	NA
ENSMUSG00000010122	Slc47a1	0.000281379	-1.93605	protein_coding	protein_coding	protein_coding,nonsense_mediated_decay,processed_transcript	NA	NA	NA
ENSMUSG00000042686	Jph1	0.00156896	-1.93513	protein_coding	protein_coding	nonsense_mediated_decay,protein_coding	NA	NA	NA
ENSMUSG00000041301	Cftr	4.38e-25	-1.93421	protein_coding	protein_coding	protein_coding,nonsense_mediated_decay,retained_intron	NA	NA	NA
ENSMUSG00000036863	Syde2	3.18e-16	-1.93125	protein_coding	protein_coding	protein_coding,processed_transcript	NA	NA	NA
ENSMUSG00000029188	Slc34a2	0.00534278	-1.92897	protein_coding	protein_coding	protein_coding,retained_intron	NA	NA	NA
ENSMUSG00000038768	9130409I23Rik	0.00178003	-1.92719	protein_coding	protein_coding	protein_coding	NA	NA	NA
ENSMUSG00000053279	Aldh1a1	9.42e-05	-1.92032	protein_coding	protein_coding	protein_coding	NA	NA	NA
ENSMUSG00000034687	Fras1	1.85e-05	-1.9186	protein_coding	protein_coding	protein_coding,retained_intron,processed_transcript	NA	NA	NA
ENSMUSG00000042751	Nmnat2	0.0382666	-1.91837	protein_coding	protein_coding	nonsense_mediated_decay,protein_coding,processed_transcript,retained_intron	NA	NA	NA
ENSMUSG00000032033	Barx2	3.77e-08	-1.91517	protein_coding	protein_coding	protein_coding	NA	NA	NA
ENSMUSG00000042333	Tnfrsf14	6.92e-10	-1.91488	protein_coding	protein_coding	protein_coding,processed_transcript	NA	NA	NA
ENSMUSG00000047728	BC025446	5.39e-07	-1.91361	protein_coding	protein_coding	protein_coding	NA	NA	NA
ENSMUSG00000021185	9030617O03Rik	4.34e-06	-1.91277	protein_coding	protein_coding	protein_coding,nonsense_mediated_decay,processed_transcript	NA	NA	NA
ENSMUSG00000095026	Gm3336	0.00584009	-1.90916	protein_coding	protein_coding	protein_coding	NA	NA	NA
ENSMUSG00000022180	Slc7a8	6.73e-10	-1.9085	protein_coding	protein_coding	protein_coding	NA	NA	NA
ENSMUSG00000020766	Galk1	1.46e-05	-1.90312	protein_coding	protein_coding	protein_coding	NA	NA	NA
ENSMUSG00000030905	Crym	0.000156031	-1.90148	protein_coding	protein_coding	protein_coding,retained_intron	NA	NA	NA
ENSMUSG00000023243	Kcnk5	9.25e-14	-1.90015	protein_coding	protein_coding	protein_coding	NA	NA	NA
ENSMUSG00000032561	Acpp	1.09e-19	-1.89446	protein_coding	protein_coding	protein_coding,retained_intron	NA	NA	NA
ENSMUSG00000032373	Car12	2.85e-06	-1.89126	protein_coding	protein_coding	protein_coding,retained_intron	NA	NA	NA
ENSMUSG00000009646	Pla2g12b	1.45e-05	-1.89056	protein_coding	protein_coding	protein_coding	NA	NA	NA
ENSMUSG00000003123	Lipe	0.00014205	-1.88501	protein_coding	protein_coding	protein_coding,nonsense_mediated_decay,retained_intron	NA	NA	NA
ENSMUSG00000029151	Slc30a3	0.00232034	-1.8808	protein_coding	protein_coding	protein_coding,nonsense_mediated_decay	NA	NA	NA
ENSMUSG00000011382	Dhdh	0.00018636	-1.87938	protein_coding	protein_coding	protein_coding,processed_transcript,retained_intron	NA	NA	NA
ENSMUSG00000020363	Gfpt2	0.0375145	-1.87744	protein_coding	protein_coding	retained_intron,protein_coding	NA	NA	NA
ENSMUSG00000026773	Pfkfb3	9.73e-13	-1.87625	protein_coding	protein_coding	protein_coding,nonsense_mediated_decay,processed_transcript,retained_intron	NA	NA	NA
ENSMUSG00000031987	Egln1	5.66e-10	-1.87557	protein_coding	protein_coding	protein_coding	NA	NA	NA
ENSMUSG00000024131	Slc3a1	2.03e-09	-1.87359	protein_coding	protein_coding	protein_coding	NA	NA	NA
ENSMUSG00000056938	Acbd4	7.02e-07	-1.87264	protein_coding	protein_coding	nonsense_mediated_decay,protein_coding,processed_transcript,retained_intron	NA	NA	NA
ENSMUSG00000033581	Igf2bp2	2.24e-09	-1.8707	protein_coding	protein_coding	protein_coding,retained_intron,processed_transcript	NA	NA	NA
ENSMUSG00000057719	Sh3rf2	2.12e-17	-1.87068	protein_coding	protein_coding	protein_coding,processed_transcript	NA	NA	NA
ENSMUSG00000036473	Tbc1d24	1.9e-09	-1.86825	protein_coding	protein_coding	protein_coding,nonsense_mediated_decay,processed_transcript	NA	NA	NA
ENSMUSG00000024887	Asah2	0.000111918	-1.86288	protein_coding	protein_coding	protein_coding	NA	NA	NA
ENSMUSG00000017718	Afmid	8.04e-05	-1.86252	protein_coding	protein_coding	protein_coding,retained_intron	NA	NA	NA
ENSMUSG00000045316	Fahd1	1.71e-16	-1.85948	protein_coding	protein_coding	protein_coding	NA	NA	NA
ENSMUSG00000074179	Gm10639	0.00451389	-1.85596	protein_coding	protein_coding	protein_coding,retained_intron	NA	NA	NA
ENSMUSG00000030513	Pcsk6	2.5e-09	-1.85541	protein_coding	protein_coding	protein_coding,retained_intron	NA	NA	NA
ENSMUSG00000037148	Arhgap10	2.85e-12	-1.8482	protein_coding	protein_coding	protein_coding	NA	NA	NA
ENSMUSG00000019982	Myb	4.29e-06	-1.84817	protein_coding	protein_coding	protein_coding,retained_intron,processed_transcript	NA	NA	NA
ENSMUSG00000068299	Nat8f4	4.91e-09	-1.84783	protein_coding	protein_coding	protein_coding	NA	NA	NA
ENSMUSG00000026825	Dnm1	7.94e-05	-1.84462	protein_coding	protein_coding	protein_coding,nonsense_mediated_decay,retained_intron,processed_transcript	NA	NA	NA
ENSMUSG00000045019	Acer1	1.65e-14	-1.84424	protein_coding	protein_coding	protein_coding	NA	NA	NA
ENSMUSG00000021779	Thrb	6.81e-11	-1.84211	protein_coding	protein_coding	protein_coding	NA	NA	NA
ENSMUSG00000062007	Hsh2d	1.51e-13	-1.8395	protein_coding	protein_coding	protein_coding	NA	NA	NA
ENSMUSG00000018507	Trpv2	0.0126578	-1.83895	protein_coding	protein_coding	processed_transcript,protein_coding	NA	NA	NA
ENSMUSG00000001864	Aif1l	0.0260615	-1.83594	protein_coding	protein_coding	protein_coding,retained_intron,processed_transcript	NA	NA	NA
ENSMUSG00000055865	Fam19a3	0.00769059	-1.83526	protein_coding	protein_coding	protein_coding,processed_transcript	NA	NA	NA
ENSMUSG00000025150	Cbr2	0.0306106	-1.83383	protein_coding	protein_coding	protein_coding,retained_intron	NA	NA	NA
ENSMUSG00000050860	Phospho1	0.0148026	-1.83283	protein_coding	protein_coding	protein_coding	NA	NA	NA
ENSMUSG00000091813	Ces2h	0.0464814	-1.83098	protein_coding	protein_coding	protein_coding	NA	NA	NA
ENSMUSG00000031877	Ces2g	1.12e-13	-1.83095	protein_coding	protein_coding	protein_coding,retained_intron	NA	NA	NA
ENSMUSG00000038496	Slc19a3	0.0116652	-1.82981	protein_coding	protein_coding	protein_coding,processed_transcript	NA	NA	NA
ENSMUSG00000033717	Adra2a	0.00013471	-1.82905	protein_coding	protein_coding	protein_coding	NA	NA	NA
ENSMUSG00000041372	B4galnt3	1.08e-07	-1.82884	protein_coding	protein_coding	processed_transcript,protein_coding	NA	NA	NA
ENSMUSG00000040562	Gstm2	0.000126225	-1.82729	protein_coding	protein_coding	protein_coding,retained_intron	NA	NA	NA
ENSMUSG00000027200	Sema6d	4.58e-15	-1.8236	protein_coding	protein_coding	protein_coding,retained_intron,processed_transcript	NA	NA	NA
ENSMUSG00000033634	Nat8f2	0.0280841	-1.81965	protein_coding	protein_coding	protein_coding	NA	NA	NA
ENSMUSG00000019838	Slc16a10	6.65e-20	-1.81881	protein_coding	protein_coding	protein_coding,processed_transcript	NA	NA	NA
ENSMUSG00000023019	Gpd1	1.84e-07	-1.81505	protein_coding	protein_coding	protein_coding,retained_intron	NA	NA	NA
ENSMUSG00000015846	Rxra	2.56e-09	-1.81392	protein_coding	protein_coding	protein_coding,processed_transcript	NA	NA	NA
ENSMUSG00000010663	Fads1	3.88e-11	-1.81271	protein_coding	protein_coding	protein_coding	NA	NA	NA
ENSMUSG00000023914	Mep1a	2.8e-13	-1.80816	protein_coding	protein_coding	protein_coding,processed_transcript,retained_intron	NA	NA	NA
ENSMUSG00000031765	Mt1	5.76e-06	-1.80631	protein_coding	protein_coding	protein_coding	NA	NA	NA
ENSMUSG00000020889	Nr1d1	0.00102491	-1.80477	protein_coding	protein_coding	protein_coding,processed_transcript	NA	NA	NA
ENSMUSG00000024601	Isoc1	1.02e-22	-1.80301	protein_coding	protein_coding	protein_coding	NA	NA	NA
ENSMUSG00000048534	Amica1	2.74e-05	-1.79958	protein_coding	protein_coding	protein_coding,processed_transcript,retained_intron	NA	NA	NA
ENSMUSG00000009614	Sardh	0.0151411	-1.79613	protein_coding	protein_coding	protein_coding,processed_transcript,retained_intron	NA	NA	NA
ENSMUSG00000053470	Kdm3a	1.52e-13	-1.79403	protein_coding	protein_coding	protein_coding,retained_intron,processed_transcript,nonsense_mediated_decay	NA	NA	NA
ENSMUSG00000055114	Anxa13	7.02e-10	-1.79345	protein_coding	protein_coding	protein_coding	NA	NA	NA
ENSMUSG00000064210	Ano6	1.09e-09	-1.79341	protein_coding	protein_coding	protein_coding	NA	NA	NA
ENSMUSG00000030786	Itgam	8.22e-08	-1.7897	protein_coding	protein_coding	protein_coding,processed_transcript,nonsense_mediated_decay	NA	NA	NA
ENSMUSG00000031750	Il34	0.03787	-1.78857	protein_coding	protein_coding	processed_transcript,protein_coding	NA	NA	NA
ENSMUSG00000034781	Gna11	7.65e-05	-1.78754	protein_coding	protein_coding	protein_coding,retained_intron	NA	NA	NA
ENSMUSG00000023505	Cdca3	1.17e-13	-1.78619	protein_coding	protein_coding	protein_coding,retained_intron	NA	NA	NA
ENSMUSG00000040181	Fmo1	2.64e-09	-1.78035	protein_coding	protein_coding	protein_coding,processed_transcript,retained_intron	NA	NA	NA
ENSMUSG00000023832	Acat2	4.64e-12	-1.77771	protein_coding	protein_coding	protein_coding,processed_transcript	NA	NA	NA
ENSMUSG00000069170	Adgrv1	0.0466712	-1.77644	protein_coding	protein_coding	protein_coding,nonsense_mediated_decay,processed_transcript,retained_intron	NA	NA	NA
ENSMUSG00000010362	Rdm1	0.000296648	-1.77436	protein_coding	protein_coding	processed_transcript,protein_coding,nonsense_mediated_decay,retained_intron	NA	NA	NA
ENSMUSG00000033644	Piwil2	0.0229574	-1.77402	protein_coding	protein_coding	protein_coding	NA	NA	NA
ENSMUSG00000030214	Plbd1	4.61e-08	-1.77205	protein_coding	protein_coding	protein_coding,retained_intron	NA	NA	NA
ENSMUSG00000092060	Bend4	0.0253492	-1.77038	protein_coding	protein_coding	protein_coding,nonsense_mediated_decay	NA	NA	NA
ENSMUSG00000026980	Ly75	3.26e-15	-1.77036	protein_coding	protein_coding	protein_coding	NA	NA	NA
ENSMUSG00000035699	Slc51a	0.00077297	-1.76929	protein_coding	protein_coding	protein_coding	NA	NA	NA
ENSMUSG00000052852	Reep1	0.000933011	-1.76889	protein_coding	protein_coding	protein_coding	NA	NA	NA
ENSMUSG00000028763	Hspg2	5.32e-08	-1.76538	protein_coding	protein_coding	protein_coding,processed_transcript	NA	NA	NA
ENSMUSG00000021215	Net1	2.74e-09	-1.76388	protein_coding	protein_coding	protein_coding	NA	NA	NA
ENSMUSG00000017453	Pipox	8.74e-09	-1.76139	protein_coding	protein_coding	protein_coding,retained_intron,processed_transcript	NA	NA	NA
ENSMUSG00000040231	Syngr4	0.0439545	-1.76033	protein_coding	protein_coding	processed_transcript,protein_coding	NA	NA	NA
ENSMUSG00000042797	Aqp11	4.1e-10	-1.76025	protein_coding	protein_coding	protein_coding,retained_intron,processed_transcript	NA	NA	NA
ENSMUSG00000039981	Zc3h12d	1e-16	-1.75911	protein_coding	protein_coding	protein_coding	NA	NA	NA
ENSMUSG00000021411	Pxdc1	4.92e-08	-1.75909	protein_coding	protein_coding	protein_coding,nonsense_mediated_decay	NA	NA	NA
ENSMUSG00000023057	Fabp2	3.07e-06	-1.75632	protein_coding	protein_coding	protein_coding	NA	NA	NA
ENSMUSG00000054978	Kbtbd13	0.00301571	-1.75332	protein_coding	protein_coding	protein_coding	NA	NA	NA
ENSMUSG00000015533	Itga2	1.2e-14	-1.7502	protein_coding	protein_coding	protein_coding	NA	NA	NA
ENSMUSG00000029596	Sdsl	1.78e-07	-1.74971	protein_coding	protein_coding	protein_coding	NA	NA	NA
ENSMUSG00000027298	Tyro3	4.22e-06	-1.74703	protein_coding	protein_coding	protein_coding,processed_transcript,retained_intron	NA	NA	NA
ENSMUSG00000037649	H2-DMa	0.00224538	-1.74485	protein_coding	protein_coding	protein_coding,retained_intron	NA	NA	NA
ENSMUSG00000070304	Scn2b	0.000693783	-1.74473	protein_coding	protein_coding	protein_coding	NA	NA	NA
ENSMUSG00000110573	RP23-383B20.1	0.000748817	-1.73651	protein_coding	protein_coding	protein_coding	NA	NA	NA
ENSMUSG00000021640	Naip1	3.94e-10	-1.735	protein_coding	protein_coding	protein_coding	NA	NA	NA
ENSMUSG00000034472	Rasd2	4.3e-07	-1.73425	protein_coding	protein_coding	protein_coding	NA	NA	NA
ENSMUSG00000048620	Olfr1336	0.00163244	-1.73342	protein_coding	protein_coding	protein_coding	NA	NA	NA
ENSMUSG00000049799	Lrrc19	0.000101081	-1.73277	protein_coding	protein_coding	protein_coding	NA	NA	NA
ENSMUSG00000026687	Aldh9a1	6.41e-21	-1.72944	protein_coding	protein_coding	protein_coding,processed_transcript,retained_intron	NA	NA	NA
ENSMUSG00000025467	Prap1	0.00802085	-1.72804	protein_coding	protein_coding	protein_coding	NA	NA	NA
ENSMUSG00000044254	Pcsk9	1.21e-05	-1.72627	protein_coding	protein_coding	protein_coding	NA	NA	NA
ENSMUSG00000022253	Nadk2	1.51e-15	-1.72561	protein_coding	protein_coding	protein_coding,processed_transcript,retained_intron	NA	NA	NA
ENSMUSG00000041642	Kif21b	4.49e-06	-1.72524	protein_coding	protein_coding	protein_coding,nonsense_mediated_decay,retained_intron,processed_transcript	NA	NA	NA
ENSMUSG00000024981	Acsl5	7.03e-07	-1.72013	protein_coding	protein_coding	protein_coding	NA	NA	NA
ENSMUSG00000025545	Clybl	1.32e-05	-1.71829	protein_coding	protein_coding	protein_coding	NA	NA	NA
ENSMUSG00000022436	Sh3bp1	1.62e-05	-1.71783	protein_coding	protein_coding	processed_transcript,protein_coding,nonsense_mediated_decay	NA	NA	NA
ENSMUSG00000032114	Slc37a4	1.18e-07	-1.71594	protein_coding	protein_coding	protein_coding,retained_intron	NA	NA	NA
ENSMUSG00000090486	BC035947	0.00169311	-1.70734	protein_coding	protein_coding	protein_coding,processed_transcript	NA	NA	NA
ENSMUSG00000025648	Pfkfb4	7.77e-05	-1.70528	protein_coding	protein_coding	protein_coding,retained_intron,nonsense_mediated_decay,processed_transcript	NA	NA	NA
ENSMUSG00000042942	Greb1l	0.00683515	-1.70302	protein_coding	protein_coding	retained_intron,protein_coding,nonsense_mediated_decay,processed_transcript	NA	NA	NA
ENSMUSG00000057963	Itpk1	9.82e-05	-1.70249	protein_coding	protein_coding	protein_coding,processed_transcript	NA	NA	NA
ENSMUSG00000063239	Grm4	0.00843837	-1.7003	protein_coding	protein_coding	protein_coding,retained_intron,processed_transcript	NA	NA	NA
ENSMUSG00000056758	Hmga2	5.82e-07	-1.70022	protein_coding	protein_coding	protein_coding,retained_intron	NA	NA	NA
ENSMUSG00000046179	E2f8	1.25e-08	-1.69787	protein_coding	protein_coding	protein_coding,retained_intron	NA	NA	NA
ENSMUSG00000035473	Galm	2.31e-07	-1.6975	protein_coding	protein_coding	protein_coding	NA	NA	NA
ENSMUSG00000035561	Aldh1b1	3.36e-16	-1.6955	protein_coding	protein_coding	protein_coding	NA	NA	NA
ENSMUSG00000048473	Sult6b2	0.000911496	-1.69535	protein_coding	protein_coding	nonsense_mediated_decay,protein_coding	NA	NA	NA
ENSMUSG00000003865	Gys1	1.3e-08	-1.69483	protein_coding	protein_coding	protein_coding,processed_transcript,retained_intron	NA	NA	NA
ENSMUSG00000059060	Rad51b	7e-05	-1.69265	protein_coding	protein_coding	protein_coding	NA	NA	NA
ENSMUSG00000090891	D6Ertd527e	0.0494781	-1.69242	protein_coding	protein_coding	protein_coding,processed_transcript	NA	NA	NA
ENSMUSG00000024556	Me2	5.08e-19	-1.68944	protein_coding	protein_coding	protein_coding	NA	NA	NA
ENSMUSG00000022219	Cideb	4.71e-05	-1.68919	protein_coding	protein_coding	protein_coding,retained_intron	NA	NA	NA
ENSMUSG00000030878	Cdr2	0.000102188	-1.68752	protein_coding	protein_coding	protein_coding,nonsense_mediated_decay,retained_intron	NA	NA	NA
ENSMUSG00000085683	9130409J20Rik	2.78e-15	-1.68396	protein_coding	protein_coding	protein_coding,processed_transcript	NA	NA	NA
ENSMUSG00000030761	Myo7a	2.25e-05	-1.68175	protein_coding	protein_coding	protein_coding,nonsense_mediated_decay,retained_intron,processed_transcript	NA	NA	NA
ENSMUSG00000036813	Entpd8	6.19e-12	-1.68057	protein_coding	protein_coding	retained_intron,protein_coding,nonsense_mediated_decay	NA	NA	NA
ENSMUSG00000026921	Egfl7	5.77e-06	-1.67817	protein_coding	protein_coding	protein_coding,nonsense_mediated_decay,processed_transcript,retained_intron	NA	NA	NA
ENSMUSG00000025574	Tk1	2.39e-07	-1.67772	protein_coding	protein_coding	protein_coding,retained_intron	NA	NA	NA
ENSMUSG00000052595	A1cf	2.77e-05	-1.67604	protein_coding	protein_coding	protein_coding	NA	NA	NA
ENSMUSG00000000308	Ckmt1	6.46e-05	-1.67314	protein_coding	protein_coding	protein_coding,nonsense_mediated_decay,retained_intron	NA	NA	NA
ENSMUSG00000026389	Steap3	1.35e-09	-1.67209	protein_coding	protein_coding	protein_coding	NA	NA	NA
ENSMUSG00000020140	Lgr5	0.0239927	-1.66998	protein_coding	protein_coding	protein_coding,retained_intron,processed_transcript	NA	NA	NA
ENSMUSG00000028039	Efna3	0.0403188	-1.66945	protein_coding	protein_coding	protein_coding,processed_transcript	NA	NA	NA
ENSMUSG00000024998	Plce1	8.37e-15	-1.66899	protein_coding	protein_coding	processed_transcript,protein_coding,retained_intron	NA	NA	NA
ENSMUSG00000020469	Myl7	0.0218723	-1.66671	protein_coding	protein_coding	protein_coding	NA	NA	NA
ENSMUSG00000025207	Sema4g	2e-07	-1.66397	protein_coding	protein_coding	protein_coding,nonsense_mediated_decay	NA	NA	NA
ENSMUSG00000050106	Tmc8	0.00635784	-1.66364	protein_coding	protein_coding	protein_coding,retained_intron	NA	NA	NA
ENSMUSG00000076435	Acsf2	0.000608958	-1.6632	protein_coding	protein_coding	protein_coding,processed_transcript	NA	NA	NA
ENSMUSG00000022853	Ehhadh	5.51e-18	-1.66176	protein_coding	protein_coding	protein_coding	NA	NA	NA
ENSMUSG00000037636	Slc25a43	0.0314736	-1.66138	protein_coding	protein_coding	protein_coding,processed_transcript	NA	NA	NA
ENSMUSG00000028944	Prkag2	2.46e-09	-1.65938	protein_coding	protein_coding	protein_coding,retained_intron,processed_transcript	NA	NA	NA
ENSMUSG00000091705	H2-Q2	8.28e-05	-1.65565	protein_coding	protein_coding	protein_coding	NA	NA	NA
ENSMUSG00000025790	Slco3a1	0.000129279	-1.6556	protein_coding	protein_coding	protein_coding,retained_intron,processed_transcript	NA	NA	NA
ENSMUSG00000022364	Tbc1d31	3.05e-12	-1.6542	protein_coding	protein_coding	protein_coding,processed_transcript,nonsense_mediated_decay,retained_intron	NA	NA	NA
ENSMUSG00000027793	Ccna1	0.0136709	-1.65361	protein_coding	protein_coding	protein_coding	NA	NA	NA
ENSMUSG00000001270	Ckb	4.02e-05	-1.65331	protein_coding	protein_coding	protein_coding	NA	NA	NA
ENSMUSG00000031378	Abcd1	1.09e-06	-1.65252	protein_coding	protein_coding	protein_coding	NA	NA	NA
ENSMUSG00000021620	Acot12	0.0165535	-1.65087	protein_coding	protein_coding	protein_coding,retained_intron,processed_transcript	NA	NA	NA
ENSMUSG00000022051	Bnip3l	7.94e-08	-1.65053	protein_coding	protein_coding	protein_coding,processed_transcript,retained_intron	NA	NA	NA
ENSMUSG00000029644	Pdx1	0.00228748	-1.64884	protein_coding	protein_coding	protein_coding	NA	NA	NA
ENSMUSG00000090622	A930033H14Rik	0.0127468	-1.64858	protein_coding	protein_coding	protein_coding	NA	NA	NA
ENSMUSG00000028438	Kif24	5.27e-07	-1.64781	protein_coding	protein_coding	protein_coding,processed_transcript	NA	NA	NA
ENSMUSG00000005611	Mrvi1	0.0149218	-1.64372	protein_coding	protein_coding	protein_coding,processed_transcript,retained_intron	NA	NA	NA
ENSMUSG00000027187	Cat	5.75e-17	-1.64224	protein_coding	protein_coding	protein_coding	NA	NA	NA
ENSMUSG00000064036	Mro	1.66e-06	-1.63974	protein_coding	protein_coding	protein_coding,processed_transcript,retained_intron	NA	NA	NA
ENSMUSG00000066441	Rdh11	7.56e-16	-1.6387	protein_coding	protein_coding	protein_coding,nonsense_mediated_decay	NA	NA	NA
ENSMUSG00000032411	Tfdp2	1.35e-16	-1.63565	protein_coding	protein_coding	protein_coding,processed_transcript,retained_intron	NA	NA	NA
ENSMUSG00000061654	Spry3	5.95e-10	-1.63513	protein_coding	protein_coding	protein_coding	NA	NA	NA
ENSMUSG00000041237	Pklr	0.00239007	-1.6343	protein_coding	protein_coding	protein_coding,processed_transcript	NA	NA	NA
ENSMUSG00000047528	Als2cr12	0.000572512	-1.63427	protein_coding	protein_coding	protein_coding,nonsense_mediated_decay,retained_intron	NA	NA	NA
ENSMUSG00000049313	Sorl1	2.45e-08	-1.63287	protein_coding	protein_coding	protein_coding,retained_intron,processed_transcript	NA	NA	NA
ENSMUSG00000074300	BC030870	2.27e-12	-1.63227	protein_coding	protein_coding	protein_coding	NA	NA	NA
ENSMUSG00000024525	Impa2	1.65e-05	-1.62664	protein_coding	protein_coding	protein_coding	NA	NA	NA
ENSMUSG00000022938	Fam3b	0.036144	-1.6252	protein_coding	protein_coding	processed_transcript,protein_coding	NA	NA	NA
ENSMUSG00000042770	Hebp1	0.000542642	-1.62347	protein_coding	protein_coding	protein_coding,processed_transcript,retained_intron	NA	NA	NA
ENSMUSG00000042766	Trim46	2.56e-07	-1.61816	protein_coding	protein_coding	protein_coding,processed_transcript,nonsense_mediated_decay	NA	NA	NA
ENSMUSG00000025154	Arhgap19	3.86e-11	-1.61575	protein_coding	protein_coding	protein_coding	NA	NA	NA
ENSMUSG00000094858	Olfr1297	0.0445881	-1.61532	protein_coding	protein_coding	protein_coding	NA	NA	NA
ENSMUSG00000027603	Ggt7	0.0204232	-1.6143	protein_coding	protein_coding	protein_coding,retained_intron	NA	NA	NA
ENSMUSG00000024978	Gpam	4.67e-18	-1.61389	protein_coding	protein_coding	protein_coding	NA	NA	NA
ENSMUSG00000027331	Knstrn	1.06e-09	-1.61193	protein_coding	protein_coding	protein_coding,nonsense_mediated_decay	NA	NA	NA
ENSMUSG00000025780	Itih5	0.00283712	-1.60832	protein_coding	protein_coding	protein_coding	NA	NA	NA
ENSMUSG00000048440	Cyp4f16	4.56e-08	-1.60697	protein_coding	protein_coding	protein_coding,nonsense_mediated_decay,processed_transcript,retained_intron	NA	NA	NA
ENSMUSG00000025076	Casp7	2.34e-15	-1.60465	protein_coding	protein_coding	protein_coding	NA	NA	NA
ENSMUSG00000019785	Clvs2	0.0480434	-1.60389	protein_coding	protein_coding	protein_coding,processed_transcript	NA	NA	NA
ENSMUSG00000030278	Cidec	0.000724279	-1.60387	protein_coding	protein_coding	protein_coding	NA	NA	NA
ENSMUSG00000033985	Tesk2	0.000176458	-1.60081	protein_coding	protein_coding	protein_coding,processed_transcript	NA	NA	NA
ENSMUSG00000029859	Epha1	9.33e-07	-1.59869	protein_coding	protein_coding	protein_coding,retained_intron	NA	NA	NA
ENSMUSG00000043154	Ppp2r3a	0.000326557	-1.5968	protein_coding	protein_coding	protein_coding,processed_transcript,retained_intron	NA	NA	NA
ENSMUSG00000027317	Ppp1r14d	2.5e-09	-1.59487	protein_coding	protein_coding	protein_coding	NA	NA	NA
ENSMUSG00000026692	Fmo4	1.38e-11	-1.59416	protein_coding	protein_coding	protein_coding,retained_intron	NA	NA	NA
ENSMUSG00000051652	Lrrc3	8.96e-05	-1.59374	protein_coding	protein_coding	protein_coding	NA	NA	NA
ENSMUSG00000024378	Stard4	4.14e-18	-1.59314	protein_coding	protein_coding	protein_coding,retained_intron	NA	NA	NA
ENSMUSG00000021240	Abcd4	0.00014327	-1.59054	protein_coding	protein_coding	protein_coding	NA	NA	NA
ENSMUSG00000040447	Spns2	0.00290141	-1.58667	protein_coding	protein_coding	protein_coding,retained_intron,processed_transcript	NA	NA	NA
ENSMUSG00000035811	Ugt2b35	3.95e-11	-1.58666	protein_coding	protein_coding	protein_coding	NA	NA	NA
ENSMUSG00000028223	Decr1	9.73e-13	-1.5862	protein_coding	protein_coding	protein_coding,processed_transcript	NA	NA	NA
ENSMUSG00000009633	G0s2	0.00190041	-1.581	protein_coding	protein_coding	protein_coding	NA	NA	NA
ENSMUSG00000020897	Aurkb	2.31e-07	-1.57767	protein_coding	protein_coding	protein_coding,processed_transcript,retained_intron	NA	NA	NA
ENSMUSG00000028262	Clca3a2	0.00102408	-1.57746	protein_coding	protein_coding	protein_coding,retained_intron	NA	NA	NA
ENSMUSG00000067229	Cyp2c66	0.0115135	-1.57651	protein_coding	protein_coding	protein_coding,nonsense_mediated_decay	NA	NA	NA
ENSMUSG00000056531	Ccdc18	0.000231592	-1.5757	protein_coding	protein_coding	nonsense_mediated_decay,protein_coding,retained_intron,processed_transcript	NA	NA	NA
ENSMUSG00000039899	Fgl2	2.39e-12	-1.57314	protein_coding	protein_coding	protein_coding	NA	NA	NA
ENSMUSG00000025402	Nab2	3.71e-05	-1.57016	protein_coding	protein_coding	protein_coding	NA	NA	NA
ENSMUSG00000024140	Epas1	3.7e-05	-1.56984	protein_coding	protein_coding	protein_coding	NA	NA	NA
ENSMUSG00000036242	3632451O06Rik	0.0144727	-1.56855	protein_coding	protein_coding	protein_coding,processed_transcript	NA	NA	NA
ENSMUSG00000026321	Tnfrsf11a	1.8e-08	-1.56744	protein_coding	protein_coding	protein_coding,retained_intron	NA	NA	NA
ENSMUSG00000079492	Gm11127	0.005672	-1.5668	protein_coding	protein_coding	protein_coding	NA	NA	NA
ENSMUSG00000020986	Sec23a	6.47e-07	-1.5657	protein_coding	protein_coding	protein_coding,retained_intron	NA	NA	NA
ENSMUSG00000035637	Grhpr	2.8e-09	-1.56304	protein_coding	protein_coding	protein_coding,processed_transcript,nonsense_mediated_decay	NA	NA	NA
ENSMUSG00000023571	Fam132a	0.00648701	-1.55758	protein_coding	protein_coding	protein_coding,processed_transcript	NA	NA	NA
ENSMUSG00000069622	Gm10273	0.00935874	-1.55734	protein_coding	protein_coding	protein_coding	NA	NA	NA
ENSMUSG00000066800	Rnasel	2.47e-11	-1.55326	protein_coding	protein_coding	protein_coding,retained_intron,processed_transcript	NA	NA	NA
ENSMUSG00000037818	Abhd18	1.82e-07	-1.55226	protein_coding	protein_coding	protein_coding,nonsense_mediated_decay,retained_intron,processed_transcript	NA	NA	NA
ENSMUSG00000025429	Pstpip2	0.000265765	-1.55104	protein_coding	protein_coding	protein_coding	NA	NA	NA
ENSMUSG00000038121	Fam210a	1.05e-13	-1.54995	protein_coding	protein_coding	protein_coding	NA	NA	NA
ENSMUSG00000026149	Tm4sf20	3.87e-06	-1.54987	protein_coding	protein_coding	protein_coding,processed_transcript	NA	NA	NA
ENSMUSG00000006731	B4galnt1	1.12e-11	-1.54959	protein_coding	protein_coding	protein_coding	NA	NA	NA
ENSMUSG00000026458	Ppfia4	0.0176961	-1.54958	protein_coding	protein_coding	protein_coding,processed_transcript,retained_intron	NA	NA	NA
ENSMUSG00000001323	Srr	5.69e-09	-1.54796	protein_coding	protein_coding	protein_coding,processed_transcript,retained_intron	NA	NA	NA
ENSMUSG00000033161	Atp1a1	0.00235452	-1.54584	protein_coding	protein_coding	protein_coding,retained_intron	NA	NA	NA
ENSMUSG00000053604	Rpia	4.46e-12	-1.54458	protein_coding	protein_coding	protein_coding,retained_intron	NA	NA	NA
ENSMUSG00000041168	Lonp1	9.11e-06	-1.54455	protein_coding	protein_coding	protein_coding	NA	NA	NA
ENSMUSG00000046598	Bdh1	4.85e-12	-1.53786	protein_coding	protein_coding	protein_coding,retained_intron,processed_transcript	NA	NA	NA
ENSMUSG00000048583	Igf2	0.00853481	-1.53777	protein_coding	protein_coding	protein_coding,processed_transcript,retained_intron	NA	NA	NA
ENSMUSG00000050379	2006-09-01	1.97e-11	-1.53343	protein_coding	protein_coding	protein_coding,retained_intron	NA	NA	NA
ENSMUSG00000031520	Vegfc	0.0235716	-1.53169	protein_coding	protein_coding	protein_coding,processed_transcript	NA	NA	NA
ENSMUSG00000064202	4430402I18Rik	0.0264799	-1.53	protein_coding	protein_coding	protein_coding,nonsense_mediated_decay,processed_transcript	NA	NA	NA
ENSMUSG00000079055	Slc8a3	0.0490938	-1.52847	protein_coding	protein_coding	protein_coding,retained_intron	NA	NA	NA
ENSMUSG00000043639	Rbm20	0.000374553	-1.5283	protein_coding	protein_coding	protein_coding,processed_transcript,nonsense_mediated_decay	NA	NA	NA
ENSMUSG00000068551	Zfp467	0.0120602	-1.52768	protein_coding	protein_coding	protein_coding,nonsense_mediated_decay,retained_intron	NA	NA	NA
ENSMUSG00000029802	Abcg2	2.03e-08	-1.5268	protein_coding	protein_coding	protein_coding,processed_transcript,retained_intron,nonsense_mediated_decay	NA	NA	NA
ENSMUSG00000022265	Ank	1.34e-05	-1.52673	protein_coding	protein_coding	protein_coding,retained_intron	NA	NA	NA
ENSMUSG00000022217	Emc9	0.000963747	-1.52604	protein_coding	protein_coding	protein_coding,retained_intron	NA	NA	NA
ENSMUSG00000041737	Tmem45b	0.000118004	-1.5249	protein_coding	protein_coding	protein_coding,retained_intron	NA	NA	NA
ENSMUSG00000032374	Plod2	0.00104042	-1.52426	protein_coding	protein_coding	protein_coding,retained_intron	NA	NA	NA
ENSMUSG00000052062	Pard3b	1.74e-10	-1.52342	protein_coding	protein_coding	protein_coding,processed_transcript,retained_intron	NA	NA	NA
ENSMUSG00000037169	Mycn	0.000853049	-1.52326	protein_coding	protein_coding	protein_coding,processed_transcript	NA	NA	NA
ENSMUSG00000026605	Cenpf	0.00476124	-1.52281	protein_coding	protein_coding	protein_coding,retained_intron,nonsense_mediated_decay	NA	NA	NA
ENSMUSG00000090213	Tmem189	2.46e-09	-1.52072	protein_coding	protein_coding	protein_coding,processed_transcript,retained_intron	NA	NA	NA
ENSMUSG00000061825	Ces2c	0.00169311	-1.5206	protein_coding	protein_coding	protein_coding,retained_intron	NA	NA	NA
ENSMUSG00000040249	Lrp1	0.00683447	-1.51701	protein_coding	protein_coding	protein_coding,retained_intron,nonsense_mediated_decay	NA	NA	NA
ENSMUSG00000044026	Slc35g1	3.56e-15	-1.51569	protein_coding	protein_coding	protein_coding	NA	NA	NA
ENSMUSG00000054115	Skp2	2.39e-08	-1.51368	protein_coding	protein_coding	protein_coding,retained_intron,processed_transcript	NA	NA	NA
ENSMUSG00000017724	Etv4	0.000114391	-1.5135	protein_coding	protein_coding	protein_coding,processed_transcript	NA	NA	NA
ENSMUSG00000058022	Adtrp	1.12e-06	-1.51211	protein_coding	protein_coding	protein_coding	NA	NA	NA
ENSMUSG00000021175	Cdca7l	2.46e-05	-1.51172	protein_coding	protein_coding	processed_transcript,protein_coding	NA	NA	NA
ENSMUSG00000037905	Bri3bp	2.89e-09	-1.511	protein_coding	protein_coding	protein_coding	NA	NA	NA
ENSMUSG00000024972	Lgals12	0.000147516	-1.51062	protein_coding	protein_coding	protein_coding	NA	NA	NA
ENSMUSG00000026447	Pik3c2b	2.06e-05	-1.50869	protein_coding	protein_coding	protein_coding,retained_intron	NA	NA	NA
ENSMUSG00000001348	Acp5	9.85e-10	-1.50805	protein_coding	protein_coding	protein_coding,processed_transcript	NA	NA	NA
ENSMUSG00000025037	Maoa	1.94e-06	-1.50784	protein_coding	protein_coding	protein_coding	NA	NA	NA
ENSMUSG00000062908	Acadm	6.31e-05	-1.50777	protein_coding	protein_coding	protein_coding,retained_intron,nonsense_mediated_decay	NA	NA	NA
ENSMUSG00000060002	Chpt1	3.1e-05	-1.50698	protein_coding	protein_coding	protein_coding,nonsense_mediated_decay	NA	NA	NA
ENSMUSG00000030543	Mesp2	0.000534312	-1.50477	protein_coding	protein_coding	protein_coding	NA	NA	NA
ENSMUSG00000031381	Piga	5.35e-09	-1.50477	protein_coding	protein_coding	protein_coding,nonsense_mediated_decay,retained_intron	NA	NA	NA
ENSMUSG00000029153	Ociad2	1.57e-14	-1.50351	protein_coding	protein_coding	protein_coding	NA	NA	NA
ENSMUSG00000024885	Aldh3b1	7.09e-05	-1.50337	protein_coding	protein_coding	protein_coding	NA	NA	NA
ENSMUSG00000027379	Bub1	6.43e-07	-1.50287	protein_coding	protein_coding	protein_coding,retained_intron,processed_transcript	NA	NA	NA
ENSMUSG00000079396	Gm3411	0.000159944	-1.50021	protein_coding	protein_coding	protein_coding	NA	NA	NA
ENSMUSG00000032218	Ccnb2	6.55e-07	-1.49651	protein_coding	protein_coding	protein_coding	NA	NA	NA
ENSMUSG00000052392	Acot4	0.000718396	-1.49518	protein_coding	protein_coding	protein_coding,retained_intron	NA	NA	NA
ENSMUSG00000021944	Gata4	8.98e-15	-1.49406	protein_coding	protein_coding	protein_coding	NA	NA	NA
ENSMUSG00000027326	Knl1	0.000634809	-1.49209	protein_coding	protein_coding	protein_coding	NA	NA	NA
ENSMUSG00000031220	Awat2	0.00222102	-1.49181	protein_coding	protein_coding	protein_coding	NA	NA	NA
ENSMUSG00000049038	Mterf2	0.000714727	-1.48927	protein_coding	protein_coding	protein_coding	NA	NA	NA
ENSMUSG00000001227	Sema6b	0.000244193	-1.48826	protein_coding	protein_coding	protein_coding	NA	NA	NA
ENSMUSG00000026932	Nacc2	1.12e-07	-1.48723	protein_coding	protein_coding	protein_coding,processed_transcript	NA	NA	NA
ENSMUSG00000029575	Mmab	8.13e-14	-1.48651	protein_coding	protein_coding	protein_coding	NA	NA	NA
ENSMUSG00000010601	Apol7a	6.19e-05	-1.48496	protein_coding	protein_coding	protein_coding,retained_intron	NA	NA	NA
ENSMUSG00000048992	Prss32	0.00241785	-1.48432	protein_coding	protein_coding	processed_transcript,protein_coding,nonsense_mediated_decay	NA	NA	NA
ENSMUSG00000027883	Gpsm2	1.2e-11	-1.48144	protein_coding	protein_coding	protein_coding,retained_intron,processed_transcript	NA	NA	NA
ENSMUSG00000026622	Nek2	2.5e-09	-1.47895	protein_coding	protein_coding	protein_coding,retained_intron,processed_transcript	NA	NA	NA
ENSMUSG00000034285	Nipsnap1	2.46e-13	-1.47858	protein_coding	protein_coding	protein_coding,nonsense_mediated_decay,processed_transcript	NA	NA	NA
ENSMUSG00000024799	Tm7sf2	0.000377828	-1.47831	protein_coding	protein_coding	protein_coding,nonsense_mediated_decay,retained_intron	NA	NA	NA
ENSMUSG00000042035	Igsf3	7.97e-06	-1.47824	protein_coding	protein_coding	protein_coding,retained_intron	NA	NA	NA
ENSMUSG00000025176	Hoga1	0.00712658	-1.47724	protein_coding	protein_coding	processed_transcript,protein_coding,retained_intron	NA	NA	NA
ENSMUSG00000002781	Tmem143	3.52e-06	-1.4766	protein_coding	protein_coding	protein_coding,nonsense_mediated_decay,retained_intron,processed_transcript	NA	NA	NA
ENSMUSG00000021884	Hacl1	6.98e-08	-1.47654	protein_coding	protein_coding	nonsense_mediated_decay,protein_coding,processed_transcript,retained_intron	NA	NA	NA
ENSMUSG00000027843	Ptpn22	0.0264095	-1.47487	protein_coding	protein_coding	nonsense_mediated_decay,protein_coding,processed_transcript,retained_intron	NA	NA	NA
ENSMUSG00000055730	Ces2a	0.000204514	-1.4746	protein_coding	protein_coding	protein_coding,nonsense_mediated_decay	NA	NA	NA
ENSMUSG00000057789	Bak1	0.000289222	-1.47455	protein_coding	protein_coding	protein_coding,nonsense_mediated_decay,processed_transcript	NA	NA	NA
ENSMUSG00000044320	1700001O22Rik	0.0246073	-1.47402	protein_coding	protein_coding	processed_transcript,protein_coding	NA	NA	NA
ENSMUSG00000031004	Mki67	1.02e-06	-1.47158	protein_coding	protein_coding	protein_coding	NA	NA	NA
ENSMUSG00000057596	Trim30d	0.00899604	-1.47103	protein_coding	protein_coding	protein_coding	NA	NA	NA
ENSMUSG00000042828	Trim72	0.00277168	-1.47009	protein_coding	protein_coding	protein_coding	NA	NA	NA
ENSMUSG00000022210	Dhrs4	3.85e-08	-1.47006	protein_coding	protein_coding	protein_coding	NA	NA	NA
ENSMUSG00000033826	Dnah8	7.35e-05	-1.46788	protein_coding	protein_coding	protein_coding	NA	NA	NA
ENSMUSG00000020258	Glyctk	0.000560648	-1.46413	protein_coding	protein_coding	protein_coding	NA	NA	NA
ENSMUSG00000001566	Mnx1	1.53e-07	-1.46409	protein_coding	protein_coding	protein_coding	NA	NA	NA
ENSMUSG00000027715	Ccna2	9.43e-13	-1.45947	protein_coding	protein_coding	protein_coding,processed_transcript,nonsense_mediated_decay,retained_intron	NA	NA	NA
ENSMUSG00000031838	Ifi30	0.000903529	-1.45826	protein_coding	protein_coding	protein_coding	NA	NA	NA
ENSMUSG00000020407	Upp1	4.4e-05	-1.45584	protein_coding	protein_coding	protein_coding,retained_intron	NA	NA	NA
ENSMUSG00000022094	Slc39a14	0.000492771	-1.45306	protein_coding	protein_coding	protein_coding,retained_intron	NA	NA	NA
ENSMUSG00000020387	Jade2	5.67e-13	-1.45117	protein_coding	protein_coding	protein_coding,processed_transcript	NA	NA	NA
ENSMUSG00000024663	Rab3il1	0.0151108	-1.44928	protein_coding	protein_coding	protein_coding,nonsense_mediated_decay,retained_intron	NA	NA	NA
ENSMUSG00000013766	Ly6g6e	0.0346093	-1.44868	protein_coding	protein_coding	protein_coding	NA	NA	NA
ENSMUSG00000025026	Add3	7.87e-14	-1.44793	protein_coding	protein_coding	protein_coding	NA	NA	NA
ENSMUSG00000037686	Aspg	4.21e-06	-1.44724	protein_coding	protein_coding	protein_coding	NA	NA	NA
ENSMUSG00000068686	Cd59b	0.0142424	-1.44604	protein_coding	protein_coding	protein_coding	NA	NA	NA
ENSMUSG00000031451	Gas6	0.000314806	-1.44512	protein_coding	protein_coding	protein_coding	NA	NA	NA
ENSMUSG00000041444	Arhgap32	2.08e-07	-1.4451	protein_coding	protein_coding	protein_coding,retained_intron	NA	NA	NA
ENSMUSG00000021069	Pygl	0.033523	-1.44479	protein_coding	protein_coding	protein_coding,processed_transcript,retained_intron	NA	NA	NA
ENSMUSG00000098678	Mroh6	0.0404694	-1.44336	protein_coding	protein_coding	protein_coding	NA	NA	NA
ENSMUSG00000037509	Arhgef4	0.00187698	-1.44304	protein_coding	protein_coding	protein_coding,retained_intron,nonsense_mediated_decay	NA	NA	NA
ENSMUSG00000051811	Cox6b2	0.0472752	-1.44023	protein_coding	protein_coding	protein_coding,nonsense_mediated_decay,retained_intron	NA	NA	NA
ENSMUSG00000042041	2010003K11Rik	0.00316382	-1.43799	protein_coding	protein_coding	protein_coding	NA	NA	NA
ENSMUSG00000017195	Zpbp2	0.0494552	-1.4375	protein_coding	protein_coding	protein_coding,processed_transcript	NA	NA	NA
ENSMUSG00000024105	Themis3	0.00960323	-1.43727	protein_coding	protein_coding	protein_coding	NA	NA	NA
ENSMUSG00000045679	Pqlc3	0.00516453	-1.43511	protein_coding	protein_coding	protein_coding,retained_intron,processed_transcript,nonsense_mediated_decay	NA	NA	NA
ENSMUSG00000039952	Dag1	2.07e-11	-1.43482	protein_coding	protein_coding	protein_coding,retained_intron	NA	NA	NA
ENSMUSG00000031349	Nsdhl	4.95e-08	-1.43224	protein_coding	protein_coding	protein_coding,retained_intron	NA	NA	NA
ENSMUSG00000027173	Depdc7	2.34e-09	-1.43171	protein_coding	protein_coding	protein_coding,retained_intron	NA	NA	NA
ENSMUSG00000025025	Mxi1	0.00292299	-1.43022	protein_coding	protein_coding	protein_coding	NA	NA	NA
ENSMUSG00000032358	Fam83b	5.51e-06	-1.42991	protein_coding	protein_coding	protein_coding	NA	NA	NA
ENSMUSG00000026385	Dbi	0.000158839	-1.42834	protein_coding	protein_coding	protein_coding,nonsense_mediated_decay,processed_transcript,retained_intron	NA	NA	NA
ENSMUSG00000031788	Kifc3	0.0151714	-1.428	protein_coding	protein_coding	protein_coding,retained_intron	NA	NA	NA
ENSMUSG00000033107	Rnf125	3.47e-05	-1.42739	protein_coding	protein_coding	protein_coding	NA	NA	NA
ENSMUSG00000023045	Soat2	3.04e-08	-1.42725	protein_coding	protein_coding	protein_coding,nonsense_mediated_decay	NA	NA	NA
ENSMUSG00000063450	Syne2	2.43e-08	-1.42592	protein_coding	protein_coding	protein_coding,retained_intron,nonsense_mediated_decay	NA	NA	NA
ENSMUSG00000038412	Higd1a	0.00201587	-1.42134	protein_coding	protein_coding	protein_coding	NA	NA	NA
ENSMUSG00000025227	Mfsd13a	0.01029	-1.42101	protein_coding	protein_coding	protein_coding,nonsense_mediated_decay,retained_intron	NA	NA	NA
ENSMUSG00000021806	Nid2	2e-10	-1.41992	protein_coding	protein_coding	protein_coding	NA	NA	NA
ENSMUSG00000023909	Paqr4	0.00077428	-1.41982	protein_coding	protein_coding	protein_coding	NA	NA	NA
ENSMUSG00000025500	Lmntd2	0.000336158	-1.41778	protein_coding	protein_coding	protein_coding	NA	NA	NA
ENSMUSG00000064373	Selenop	0.00131659	-1.41693	protein_coding	protein_coding	protein_coding,retained_intron	NA	NA	NA
ENSMUSG00000072949	Acot1	0.000142357	-1.41578	protein_coding	protein_coding	protein_coding	NA	NA	NA
ENSMUSG00000028943	Espn	0.00725017	-1.41551	protein_coding	protein_coding	protein_coding,processed_transcript,retained_intron	NA	NA	NA
ENSMUSG00000029541	Cyp2w1	0.0138667	-1.41416	protein_coding	protein_coding	protein_coding,retained_intron	NA	NA	NA
ENSMUSG00000027210	Meis2	0.0491456	-1.41156	protein_coding	protein_coding	protein_coding,processed_transcript,retained_intron	NA	NA	NA
ENSMUSG00000047996	Prrg1	0.00567146	-1.41136	protein_coding	protein_coding	protein_coding,processed_transcript,retained_intron	NA	NA	NA
ENSMUSG00000031391	L1cam	1.6e-08	-1.40998	protein_coding	protein_coding	protein_coding,retained_intron,processed_transcript	NA	NA	NA
ENSMUSG00000040715	Rsc1a1	0.00426805	-1.4097	protein_coding	protein_coding	protein_coding	NA	NA	NA
ENSMUSG00000018846	Pank3	9.86e-09	-1.4088	protein_coding	protein_coding	protein_coding	NA	NA	NA
ENSMUSG00000044707	Ccnjl	0.000873027	-1.40739	protein_coding	protein_coding	protein_coding,processed_transcript	NA	NA	NA
ENSMUSG00000017716	Birc5	4.78e-13	-1.40722	protein_coding	protein_coding	protein_coding	NA	NA	NA
ENSMUSG00000038422	Hdhd3	8.72e-07	-1.40559	protein_coding	protein_coding	protein_coding,processed_transcript	NA	NA	NA
ENSMUSG00000061171	Slc38a11	0.0058383	-1.39918	protein_coding	protein_coding	protein_coding,processed_transcript	NA	NA	NA
ENSMUSG00000022519	Srl	3.48e-05	-1.39878	protein_coding	protein_coding	protein_coding,processed_transcript,retained_intron	NA	NA	NA
ENSMUSG00000030528	Blm	3.03e-05	-1.39744	protein_coding	protein_coding	protein_coding,processed_transcript,retained_intron,nonsense_mediated_decay	NA	NA	NA
ENSMUSG00000021798	Ldb3	4.21e-08	-1.39562	protein_coding	protein_coding	protein_coding	NA	NA	NA
ENSMUSG00000025081	Tdrd1	0.0499571	-1.39502	protein_coding	protein_coding	protein_coding	NA	NA	NA
ENSMUSG00000067231	Cyp2c65	0.000257086	-1.3934	protein_coding	protein_coding	protein_coding	NA	NA	NA
ENSMUSG00000034413	Neurl1b	0.00096226	-1.39264	protein_coding	protein_coding	protein_coding	NA	NA	NA
ENSMUSG00000097148	Gm3839	0.0246996	-1.3909	protein_coding	protein_coding	protein_coding	NA	NA	NA
ENSMUSG00000027306	Nusap1	7.98e-09	-1.38934	protein_coding	protein_coding	protein_coding,processed_transcript	NA	NA	NA
ENSMUSG00000078954	Arhgap8	1.12e-08	-1.38868	protein_coding	protein_coding	protein_coding,retained_intron,processed_transcript	NA	NA	NA
ENSMUSG00000033105	Lss	1.37e-13	-1.38566	protein_coding	protein_coding	processed_transcript,protein_coding,retained_intron	NA	NA	NA
ENSMUSG00000041040	Fam117b	2.41e-12	-1.38502	protein_coding	protein_coding	protein_coding,nonsense_mediated_decay,retained_intron	NA	NA	NA
ENSMUSG00000036768	Kif15	0.000409578	-1.38147	protein_coding	protein_coding	protein_coding,nonsense_mediated_decay,retained_intron,processed_transcript	NA	NA	NA
ENSMUSG00000020424	Gatsl3	0.00199558	-1.38104	protein_coding	protein_coding	protein_coding	NA	NA	NA
ENSMUSG00000079414	Gm11110	0.000683974	-1.37735	protein_coding	protein_coding	protein_coding	NA	NA	NA
ENSMUSG00000051435	Fhad1	0.0313905	-1.37729	protein_coding	protein_coding	protein_coding,processed_transcript,retained_intron	NA	NA	NA
ENSMUSG00000042498	D330045A20Rik	0.000897456	-1.37714	protein_coding	protein_coding	protein_coding,processed_transcript	NA	NA	NA
ENSMUSG00000005373	Mlxipl	0.000121655	-1.37648	protein_coding	protein_coding	processed_transcript,retained_intron,protein_coding,nonsense_mediated_decay	NA	NA	NA
ENSMUSG00000063245	Zfp993	0.0386829	-1.37512	protein_coding	protein_coding	protein_coding	NA	NA	NA
ENSMUSG00000033610	Pank1	3.91e-10	-1.37416	protein_coding	protein_coding	protein_coding	NA	NA	NA
ENSMUSG00000038010	Ccdc138	3.27e-06	-1.37393	protein_coding	protein_coding	protein_coding	NA	NA	NA
ENSMUSG00000042501	Cpa6	0.0334712	-1.37144	protein_coding	protein_coding	nonsense_mediated_decay,protein_coding,retained_intron,processed_transcript	NA	NA	NA
ENSMUSG00000037628	Cdkn3	3.59e-10	-1.36953	protein_coding	protein_coding	protein_coding	NA	NA	NA
ENSMUSG00000055553	Kxd1	9.18e-05	-1.36896	protein_coding	protein_coding	protein_coding,nonsense_mediated_decay,retained_intron	NA	NA	NA
ENSMUSG00000054469	Lclat1	4.77e-11	-1.36857	protein_coding	protein_coding	protein_coding,processed_transcript	NA	NA	NA
ENSMUSG00000020330	Hmmr	4.98e-10	-1.36803	protein_coding	protein_coding	protein_coding,processed_transcript	NA	NA	NA
ENSMUSG00000035606	Ky	0.00160128	-1.3648	protein_coding	protein_coding	protein_coding,retained_intron	NA	NA	NA
ENSMUSG00000048922	Cdca2	3.49e-07	-1.36365	protein_coding	protein_coding	protein_coding,nonsense_mediated_decay,retained_intron	NA	NA	NA
ENSMUSG00000022817	Itgb5	0.000162182	-1.36021	protein_coding	protein_coding	protein_coding,processed_transcript	NA	NA	NA
ENSMUSG00000019179	Mdh2	0.00180764	-1.35836	protein_coding	protein_coding	protein_coding,retained_intron,nonsense_mediated_decay	NA	NA	NA
ENSMUSG00000026688	Mgst3	3.39e-08	-1.35803	protein_coding	protein_coding	protein_coding	NA	NA	NA
ENSMUSG00000022105	Rb1	1.5e-05	-1.35708	protein_coding	protein_coding	processed_transcript,protein_coding,retained_intron,nonsense_mediated_decay	NA	NA	NA
ENSMUSG00000022528	Hes1	0.00794101	-1.35655	protein_coding	protein_coding	processed_transcript,protein_coding,retained_intron	NA	NA	NA
ENSMUSG00000023015	Racgap1	2.35e-08	-1.35608	protein_coding	protein_coding	protein_coding,retained_intron,processed_transcript,nonsense_mediated_decay	NA	NA	NA
ENSMUSG00000035365	Parpbp	0.000218366	-1.3554	protein_coding	protein_coding	protein_coding	NA	NA	NA
ENSMUSG00000058454	Dhcr7	6.62e-10	-1.35513	protein_coding	protein_coding	processed_transcript,protein_coding,retained_intron,nonsense_mediated_decay	NA	NA	NA
ENSMUSG00000012443	Kif11	1.53e-08	-1.35451	protein_coding	protein_coding	protein_coding	NA	NA	NA
ENSMUSG00000033949	Trim36	5.81e-10	-1.35313	protein_coding	protein_coding	protein_coding	NA	NA	NA
ENSMUSG00000054717	Hmgb2	0.000274961	-1.35126	protein_coding	protein_coding	protein_coding,processed_transcript	NA	NA	NA
ENSMUSG00000018042	Cyb5r3	0.000438332	-1.35105	protein_coding	protein_coding	protein_coding	NA	NA	NA
ENSMUSG00000027695	Pld1	7.33e-12	-1.35003	protein_coding	protein_coding	protein_coding,processed_transcript,retained_intron	NA	NA	NA
ENSMUSG00000046814	Gchfr	6.62e-06	-1.3496	protein_coding	protein_coding	protein_coding	NA	NA	NA
ENSMUSG00000025888	Casp1	1.05e-11	-1.34896	protein_coding	protein_coding	protein_coding	NA	NA	NA
ENSMUSG00000052914	Cyp2j6	0.000317837	-1.34832	protein_coding	protein_coding	protein_coding	NA	NA	NA
ENSMUSG00000036887	C1qa	0.0319991	-1.34786	protein_coding	protein_coding	protein_coding	NA	NA	NA
ENSMUSG00000059791	Nrm	0.00339439	-1.34763	protein_coding	protein_coding	protein_coding	NA	NA	NA
ENSMUSG00000111709	Gm3776	0.00948045	-1.34684	protein_coding	protein_coding	protein_coding	NA	NA	NA
ENSMUSG00000078964	Ces1b	5.92e-05	-1.34607	protein_coding	protein_coding	protein_coding	NA	NA	NA
ENSMUSG00000071636	Rimbp3	0.000629059	-1.34354	protein_coding	protein_coding	protein_coding	NA	NA	NA
ENSMUSG00000027692	Tnik	9.26e-09	-1.34315	protein_coding	protein_coding	nonsense_mediated_decay,protein_coding,retained_intron,processed_transcript	NA	NA	NA
ENSMUSG00000020471	Pold2	1.36e-06	-1.34207	protein_coding	protein_coding	protein_coding,retained_intron,processed_transcript	NA	NA	NA
ENSMUSG00000018983	E2f2	1.48e-11	-1.34102	protein_coding	protein_coding	protein_coding,processed_transcript	NA	NA	NA
ENSMUSG00000026405	C4bp	0.00102982	-1.34091	protein_coding	protein_coding	protein_coding,retained_intron	NA	NA	NA
ENSMUSG00000056035	Cyp3a11	0.0233826	-1.34088	protein_coding	protein_coding	protein_coding,retained_intron	NA	NA	NA
ENSMUSG00000055493	Epm2a	0.000393506	-1.34033	protein_coding	protein_coding	protein_coding,processed_transcript	NA	NA	NA
ENSMUSG00000032357	Tinag	2.2e-10	-1.33875	protein_coding	protein_coding	protein_coding,nonsense_mediated_decay	NA	NA	NA
ENSMUSG00000006517	Mvd	9.72e-06	-1.33868	protein_coding	protein_coding	protein_coding,nonsense_mediated_decay	NA	NA	NA
ENSMUSG00000018570	2810408A11Rik	6.9e-06	-1.33783	protein_coding	protein_coding	protein_coding,nonsense_mediated_decay,retained_intron	NA	NA	NA
ENSMUSG00000041974	Spidr	1.01e-08	-1.33717	protein_coding	protein_coding	protein_coding	NA	NA	NA
ENSMUSG00000042271	Nxt2	1.58e-10	-1.33588	protein_coding	protein_coding	protein_coding,retained_intron	NA	NA	NA
ENSMUSG00000028518	Prkaa2	1.25e-05	-1.33491	protein_coding	protein_coding	protein_coding	NA	NA	NA
ENSMUSG00000047787	Flrt1	0.0382721	-1.33403	protein_coding	protein_coding	protein_coding	NA	NA	NA
ENSMUSG00000031090	Nadsyn1	6.99e-06	-1.33263	protein_coding	protein_coding	protein_coding,nonsense_mediated_decay,retained_intron	NA	NA	NA
ENSMUSG00000004270	Lpcat3	1.83e-08	-1.33215	protein_coding	protein_coding	protein_coding,retained_intron,nonsense_mediated_decay,processed_transcript	NA	NA	NA
ENSMUSG00000040433	Zbtb38	2.32e-07	-1.32873	protein_coding	protein_coding	protein_coding,non_stop_decay,processed_transcript,retained_intron	NA	NA	NA
ENSMUSG00000024795	Kif20b	6.37e-08	-1.32846	protein_coding	protein_coding	protein_coding	NA	NA	NA
ENSMUSG00000024352	Spata24	0.00402618	-1.32759	protein_coding	protein_coding	protein_coding	NA	NA	NA
ENSMUSG00000024431	Nr3c1	2.9e-12	-1.32696	protein_coding	protein_coding	protein_coding	NA	NA	NA
ENSMUSG00000047394	Odf3b	0.00399449	-1.32687	protein_coding	protein_coding	protein_coding	NA	NA	NA
ENSMUSG00000027952	Pmvk	2.61e-09	-1.32467	protein_coding	protein_coding	protein_coding	NA	NA	NA
ENSMUSG00000029521	Chek2	2.41e-05	-1.324	protein_coding	protein_coding	protein_coding,nonsense_mediated_decay,retained_intron,processed_transcript	NA	NA	NA
ENSMUSG00000020268	Lyrm7	0.00101801	-1.32332	protein_coding	protein_coding	nonsense_mediated_decay,protein_coding,retained_intron,processed_transcript	NA	NA	NA
ENSMUSG00000020009	Ifngr1	9.81e-09	-1.321	protein_coding	protein_coding	protein_coding,retained_intron,nonsense_mediated_decay,processed_transcript	NA	NA	NA
ENSMUSG00000051977	Prdm9	4.92e-05	-1.31966	protein_coding	protein_coding	protein_coding,retained_intron,processed_transcript	NA	NA	NA
ENSMUSG00000026039	Sgol2a	1.33e-05	-1.31913	protein_coding	protein_coding	protein_coding,retained_intron	NA	NA	NA
ENSMUSG00000051235	Gen1	0.000213179	-1.31906	protein_coding	protein_coding	protein_coding	NA	NA	NA
ENSMUSG00000021226	Acot2	0.00112675	-1.31785	protein_coding	protein_coding	protein_coding	NA	NA	NA
ENSMUSG00000033318	Gstt2	0.000611717	-1.31702	protein_coding	protein_coding	protein_coding	NA	NA	NA
ENSMUSG00000001739	Cldn15	1.58e-05	-1.31521	protein_coding	protein_coding	protein_coding,processed_transcript	NA	NA	NA
ENSMUSG00000039200	Atf7ip2	0.0117354	-1.31433	protein_coding	protein_coding	protein_coding,retained_intron	NA	NA	NA
ENSMUSG00000029413	Naaa	4.05e-10	-1.31424	protein_coding	protein_coding	protein_coding,retained_intron	NA	NA	NA
ENSMUSG00000033083	Tbc1d4	6.24e-08	-1.3134	protein_coding	protein_coding	protein_coding,retained_intron,nonsense_mediated_decay	NA	NA	NA
ENSMUSG00000028066	Pmf1	0.00016305	-1.31289	protein_coding	protein_coding	protein_coding,processed_transcript,retained_intron,nonsense_mediated_decay	NA	NA	NA
ENSMUSG00000036880	Acaa2	2.11e-06	-1.31285	protein_coding	protein_coding	protein_coding	NA	NA	NA
ENSMUSG00000037860	Aim2	0.0150268	-1.31284	protein_coding	protein_coding	protein_coding,processed_transcript	NA	NA	NA
ENSMUSG00000039031	Arhgap18	2.89e-11	-1.31271	protein_coding	protein_coding	protein_coding,processed_transcript	NA	NA	NA
ENSMUSG00000024066	Xdh	0.00969887	-1.31237	protein_coding	protein_coding	protein_coding	NA	NA	NA
ENSMUSG00000031629	Cenpu	0.0035866	-1.31183	protein_coding	protein_coding	protein_coding,retained_intron,nonsense_mediated_decay,processed_transcript	NA	NA	NA
ENSMUSG00000038742	Angptl6	0.0136297	-1.31121	protein_coding	protein_coding	protein_coding	NA	NA	NA
ENSMUSG00000027983	Cyp2u1	0.00536597	-1.31064	protein_coding	protein_coding	protein_coding,processed_transcript	NA	NA	NA
ENSMUSG00000023982	Guca1a	0.0441491	-1.30807	protein_coding	protein_coding	protein_coding	NA	NA	NA
ENSMUSG00000046417	Lrrc75a	3.01e-05	-1.30723	protein_coding	protein_coding	protein_coding,processed_transcript	NA	NA	NA
ENSMUSG00000027654	Fam83d	9.68e-10	-1.30722	protein_coding	protein_coding	protein_coding,retained_intron	NA	NA	NA
ENSMUSG00000058756	Thra	0.00010607	-1.30691	protein_coding	protein_coding	processed_transcript,protein_coding	NA	NA	NA
ENSMUSG00000002108	Nr1h3	9.79e-06	-1.30572	protein_coding	protein_coding	protein_coding,retained_intron,processed_transcript	NA	NA	NA
ENSMUSG00000098715	Gm28053	0.0320829	-1.30505	protein_coding	protein_coding	protein_coding,retained_intron	NA	NA	NA
ENSMUSG00000061838	Suclg2	1.67e-12	-1.305	protein_coding	protein_coding	protein_coding,processed_transcript,retained_intron	NA	NA	NA
ENSMUSG00000037989	Wnk2	9.26e-09	-1.30417	protein_coding	protein_coding	protein_coding,nonsense_mediated_decay	NA	NA	NA
ENSMUSG00000002799	Jag2	9.18e-07	-1.3034	protein_coding	protein_coding	protein_coding	NA	NA	NA
ENSMUSG00000034957	Cebpa	0.000113679	-1.30214	protein_coding	protein_coding	protein_coding	NA	NA	NA
ENSMUSG00000046949	Nqo2	6.48e-10	-1.3017	protein_coding	protein_coding	protein_coding	NA	NA	NA
ENSMUSG00000029095	Ablim2	0.0375619	-1.30106	protein_coding	protein_coding	protein_coding,nonsense_mediated_decay,retained_intron	NA	NA	NA
ENSMUSG00000047230	Cldn2	5.74e-12	-1.29954	protein_coding	protein_coding	protein_coding	NA	NA	NA
ENSMUSG00000043505	Gimap5	0.00156148	-1.29665	protein_coding	protein_coding	protein_coding,processed_transcript,retained_intron	NA	NA	NA
ENSMUSG00000051727	Kctd14	0.000463881	-1.29619	protein_coding	protein_coding	protein_coding,nonsense_mediated_decay	NA	NA	NA
ENSMUSG00000024654	Asrgl1	0.00179881	-1.29447	protein_coding	protein_coding	protein_coding,processed_transcript	NA	NA	NA
ENSMUSG00000020493	Prr11	4.36e-06	-1.29295	protein_coding	protein_coding	protein_coding	NA	NA	NA
ENSMUSG00000025959	Klf7	4.07e-07	-1.29293	protein_coding	protein_coding	protein_coding	NA	NA	NA
ENSMUSG00000026649	Cfap126	0.00013116	-1.29254	protein_coding	protein_coding	protein_coding,processed_transcript,nonsense_mediated_decay	NA	NA	NA
ENSMUSG00000050621	Rps27rt	8.19e-11	-1.29246	protein_coding	protein_coding	protein_coding	NA	NA	NA
ENSMUSG00000061607	Mdc1	3.02e-08	-1.29163	protein_coding	protein_coding	protein_coding	NA	NA	NA
ENSMUSG00000039470	Zdhhc2	8.33e-09	-1.29148	protein_coding	protein_coding	protein_coding,retained_intron,processed_transcript	NA	NA	NA
ENSMUSG00000044966	Fbxo48	0.0232886	-1.29116	protein_coding	protein_coding	protein_coding	NA	NA	NA
ENSMUSG00000027496	Aurka	4.33e-09	-1.29086	protein_coding	protein_coding	protein_coding,retained_intron	NA	NA	NA
ENSMUSG00000005553	Atp4a	0.00165768	-1.29073	protein_coding	protein_coding	protein_coding,retained_intron,nonsense_mediated_decay	NA	NA	NA
ENSMUSG00000020534	Shmt1	2.35e-06	-1.29072	protein_coding	protein_coding	protein_coding,processed_transcript,nonsense_mediated_decay,retained_intron	NA	NA	NA
ENSMUSG00000029772	Ahcyl2	0.000637603	-1.29049	protein_coding	protein_coding	protein_coding,retained_intron,nonsense_mediated_decay,processed_transcript	NA	NA	NA
ENSMUSG00000034663	Bmp2k	7.02e-12	-1.29029	protein_coding	protein_coding	protein_coding	NA	NA	NA
ENSMUSG00000022551	Cyc1	1.2e-05	-1.28592	protein_coding	protein_coding	protein_coding	NA	NA	NA
ENSMUSG00000021697	Depdc1b	0.00014758	-1.28588	protein_coding	protein_coding	protein_coding,retained_intron,nonsense_mediated_decay,processed_transcript	NA	NA	NA
ENSMUSG00000061878	Sphk1	0.0326638	-1.28585	protein_coding	protein_coding	protein_coding,retained_intron,processed_transcript	NA	NA	NA
ENSMUSG00000042148	Cox10	6.96e-11	-1.28585	protein_coding	protein_coding	protein_coding,processed_transcript	NA	NA	NA
ENSMUSG00000051483	Cbr1	0.0229118	-1.28491	protein_coding	protein_coding	protein_coding	NA	NA	NA
ENSMUSG00000031833	Mast3	0.0433395	-1.28467	protein_coding	protein_coding	protein_coding,retained_intron	NA	NA	NA
ENSMUSG00000047797	Gjb1	3.18e-11	-1.28375	protein_coding	protein_coding	protein_coding	NA	NA	NA
ENSMUSG00000074802	Gas2l3	2.17e-10	-1.28346	protein_coding	protein_coding	protein_coding	NA	NA	NA
ENSMUSG00000017950	Hnf4a	2.8e-11	-1.28339	protein_coding	protein_coding	protein_coding,processed_transcript	NA	NA	NA
ENSMUSG00000034981	Parm1	0.00627143	-1.28244	protein_coding	protein_coding	protein_coding	NA	NA	NA
ENSMUSG00000006281	Tep1	2.54e-07	-1.28159	protein_coding	protein_coding	protein_coding	NA	NA	NA
ENSMUSG00000022419	Deptor	5.51e-12	-1.28153	protein_coding	protein_coding	protein_coding	NA	NA	NA
ENSMUSG00000032902	Slc16a1	2.91e-06	-1.2809	protein_coding	protein_coding	protein_coding	NA	NA	NA
ENSMUSG00000030671	Pde3b	0.00180947	-1.28052	protein_coding	protein_coding	protein_coding,retained_intron	NA	NA	NA
ENSMUSG00000074653	Lrrc31	2.34e-09	-1.27965	protein_coding	protein_coding	protein_coding,retained_intron,processed_transcript	NA	NA	NA
ENSMUSG00000015112	Slc25a13	7.08e-06	-1.27783	protein_coding	protein_coding	protein_coding,processed_transcript,retained_intron	NA	NA	NA
ENSMUSG00000022809	Nr1i2	2.03e-08	-1.27655	protein_coding	protein_coding	protein_coding	NA	NA	NA
ENSMUSG00000034349	Smc4	2.16e-08	-1.27617	protein_coding	protein_coding	protein_coding,nonsense_mediated_decay,retained_intron,processed_transcript	NA	NA	NA
ENSMUSG00000021577	Sdha	1.22e-05	-1.27536	protein_coding	protein_coding	protein_coding,retained_intron,processed_transcript	NA	NA	NA
ENSMUSG00000026873	Phf19	0.000493557	-1.27529	protein_coding	protein_coding	protein_coding,processed_transcript,retained_intron	NA	NA	NA
ENSMUSG00000024186	Rgs11	0.0227216	-1.27495	protein_coding	protein_coding	processed_transcript,protein_coding,retained_intron	NA	NA	NA
ENSMUSG00000050103	Agmo	1.61e-05	-1.27115	protein_coding	protein_coding	protein_coding,retained_intron,nonsense_mediated_decay	NA	NA	NA
ENSMUSG00000021373	Cap2	0.0487366	-1.27095	protein_coding	protein_coding	protein_coding,processed_transcript	NA	NA	NA
ENSMUSG00000050323	Ndufaf6	0.00281483	-1.26683	protein_coding	protein_coding	protein_coding,processed_transcript	NA	NA	NA
ENSMUSG00000029260	Ugt2b34	9.54e-06	-1.26681	protein_coding	protein_coding	protein_coding	NA	NA	NA
ENSMUSG00000003528	Slc25a1	2.46e-05	-1.26634	protein_coding	protein_coding	protein_coding,retained_intron	NA	NA	NA
ENSMUSG00000038644	Pold1	0.000284015	-1.26481	protein_coding	protein_coding	protein_coding,retained_intron,nonsense_mediated_decay	NA	NA	NA
ENSMUSG00000041966	Dcaf17	4.53e-09	-1.26317	protein_coding	protein_coding	protein_coding,nonsense_mediated_decay,processed_transcript	NA	NA	NA
ENSMUSG00000035683	Melk	1.36e-05	-1.26301	protein_coding	protein_coding	protein_coding,processed_transcript	NA	NA	NA
ENSMUSG00000035441	Myo1d	3.25e-05	-1.26209	protein_coding	protein_coding	protein_coding,retained_intron	NA	NA	NA
ENSMUSG00000021733	Slc4a7	2.91e-09	-1.26155	protein_coding	protein_coding	protein_coding	NA	NA	NA
ENSMUSG00000021208	Ifi27l2b	1.73e-10	-1.25852	protein_coding	protein_coding	protein_coding	NA	NA	NA
ENSMUSG00000026090	2010300C02Rik	2.35e-11	-1.25693	protein_coding	protein_coding	protein_coding	NA	NA	NA
ENSMUSG00000034522	Zfp395	2.39e-11	-1.25672	protein_coding	protein_coding	protein_coding	NA	NA	NA
ENSMUSG00000034640	Tiparp	4.56e-06	-1.25263	protein_coding	protein_coding	protein_coding,processed_transcript	NA	NA	NA
ENSMUSG00000028278	Rragd	1.98e-09	-1.2514	protein_coding	protein_coding	protein_coding,processed_transcript	NA	NA	NA
ENSMUSG00000047221	Fam185a	8.01e-07	-1.25115	protein_coding	protein_coding	protein_coding,retained_intron,processed_transcript	NA	NA	NA
ENSMUSG00000020092	Pald1	0.00189841	-1.25103	protein_coding	protein_coding	protein_coding	NA	NA	NA
ENSMUSG00000018411	Mapt	0.0042679	-1.24982	protein_coding	protein_coding	protein_coding,retained_intron,processed_transcript	NA	NA	NA
ENSMUSG00000012123	Aim1l	0.00189315	-1.2497	protein_coding	protein_coding	protein_coding,processed_transcript,retained_intron	NA	NA	NA
ENSMUSG00000025401	Myo1a	0.00304932	-1.24628	protein_coding	protein_coding	protein_coding	NA	NA	NA
ENSMUSG00000040918	Slc19a2	5.24e-07	-1.24489	protein_coding	protein_coding	protein_coding,retained_intron	NA	NA	NA
ENSMUSG00000034773	BC030867	0.000173143	-1.24436	protein_coding	protein_coding	protein_coding,nonsense_mediated_decay,processed_transcript	NA	NA	NA
ENSMUSG00000040084	Bub1b	6.77e-07	-1.2443	protein_coding	protein_coding	protein_coding,retained_intron	NA	NA	NA
ENSMUSG00000005470	Asf1b	5.73e-07	-1.24425	protein_coding	protein_coding	protein_coding,processed_transcript,retained_intron	NA	NA	NA
ENSMUSG00000001467	Cyp51	1.43e-10	-1.24272	protein_coding	protein_coding	protein_coding,processed_transcript,retained_intron	NA	NA	NA
ENSMUSG00000029455	Aldh2	2.03e-05	-1.24168	protein_coding	protein_coding	protein_coding,retained_intron	NA	NA	NA
ENSMUSG00000068270	Shroom4	0.010111	-1.24157	protein_coding	protein_coding	protein_coding	NA	NA	NA
ENSMUSG00000036022	Fam122b	5.94e-08	-1.23794	protein_coding	protein_coding	protein_coding,processed_transcript	NA	NA	NA
ENSMUSG00000001023	S100a5	0.023093	-1.23783	protein_coding	protein_coding	protein_coding	NA	NA	NA
ENSMUSG00000005107	Slc2a9	6e-07	-1.23728	protein_coding	protein_coding	protein_coding,nonsense_mediated_decay,processed_transcript,retained_intron	NA	NA	NA
ENSMUSG00000073609	D2hgdh	1.24e-06	-1.23593	protein_coding	protein_coding	protein_coding,processed_transcript,nonsense_mediated_decay	NA	NA	NA
ENSMUSG00000028655	Mfsd2a	0.000111926	-1.23587	protein_coding	protein_coding	protein_coding,processed_transcript	NA	NA	NA
ENSMUSG00000067714	Lpar5	5.26e-08	-1.23417	protein_coding	protein_coding	protein_coding	NA	NA	NA
ENSMUSG00000041431	Ccnb1	1.04e-10	-1.23375	protein_coding	protein_coding	protein_coding,retained_intron	NA	NA	NA
ENSMUSG00000027358	Bmp2	0.000760373	-1.23321	protein_coding	protein_coding	protein_coding	NA	NA	NA
ENSMUSG00000023940	Sgol1	0.000881705	-1.23316	protein_coding	protein_coding	protein_coding,processed_transcript	NA	NA	NA
ENSMUSG00000000555	Itga5	6.01e-05	-1.23142	protein_coding	protein_coding	protein_coding,nonsense_mediated_decay	NA	NA	NA
ENSMUSG00000048012	Zfp473	0.000928343	-1.23088	protein_coding	protein_coding	protein_coding	NA	NA	NA
ENSMUSG00000038332	Sesn1	3.34e-10	-1.22932	protein_coding	protein_coding	protein_coding,processed_transcript	NA	NA	NA
ENSMUSG00000048327	Ckap2l	2.79e-07	-1.22848	protein_coding	protein_coding	protein_coding	NA	NA	NA
ENSMUSG00000019762	Iyd	0.00494428	-1.22817	protein_coding	protein_coding	protein_coding,retained_intron	NA	NA	NA
ENSMUSG00000036918	Ttc7	1.49e-10	-1.22505	protein_coding	protein_coding	protein_coding,processed_transcript,nonsense_mediated_decay,retained_intron	NA	NA	NA
ENSMUSG00000079659	Tmem243	3.75e-10	-1.22294	protein_coding	protein_coding	nonsense_mediated_decay,protein_coding,processed_transcript	NA	NA	NA
ENSMUSG00000023829	Slc22a1	1.91e-10	-1.22134	protein_coding	protein_coding	protein_coding	NA	NA	NA
ENSMUSG00000037541	Shank2	0.000352665	-1.22085	protein_coding	protein_coding	protein_coding,processed_transcript	NA	NA	NA
ENSMUSG00000029168	Dpysl5	6.68e-07	-1.22056	protein_coding	protein_coding	protein_coding,processed_transcript,retained_intron	NA	NA	NA
ENSMUSG00000018012	Rac3	0.00266936	-1.21872	protein_coding	protein_coding	protein_coding,processed_transcript	NA	NA	NA
ENSMUSG00000019864	Rtn4ip1	5.35e-08	-1.2183	protein_coding	protein_coding	protein_coding,processed_transcript	NA	NA	NA
ENSMUSG00000020808	Fam64a	0.0222878	-1.21409	protein_coding	protein_coding	protein_coding,processed_transcript	NA	NA	NA
ENSMUSG00000006369	Fbln1	7.62e-05	-1.21307	protein_coding	protein_coding	protein_coding,processed_transcript	NA	NA	NA
ENSMUSG00000052676	Zmat1	0.00592363	-1.21286	protein_coding	protein_coding	protein_coding,retained_intron,processed_transcript	NA	NA	NA
ENSMUSG00000096727	Psmb9	0.00590946	-1.21265	protein_coding	protein_coding	protein_coding,retained_intron	NA	NA	NA
ENSMUSG00000062312	Erbb2	5.77e-07	-1.21209	protein_coding	protein_coding	protein_coding,processed_transcript	NA	NA	NA
ENSMUSG00000069793	Slfn9	0.00915833	-1.21144	protein_coding	protein_coding	protein_coding	NA	NA	NA
ENSMUSG00000073399	Trim40	0.0128632	-1.21107	protein_coding	protein_coding	protein_coding,retained_intron,processed_transcript	NA	NA	NA
ENSMUSG00000041945	Mfsd9	0.000148506	-1.21079	protein_coding	protein_coding	protein_coding,nonsense_mediated_decay,retained_intron	NA	NA	NA
ENSMUSG00000049878	Rlf	1.67e-10	-1.20822	protein_coding	protein_coding	protein_coding	NA	NA	NA
ENSMUSG00000019647	Sema6a	0.0299652	-1.20804	protein_coding	protein_coding	protein_coding,retained_intron	NA	NA	NA
ENSMUSG00000024074	Crim1	2.15e-10	-1.2078	protein_coding	protein_coding	protein_coding	NA	NA	NA
ENSMUSG00000031533	Mrps31	1.85e-10	-1.20709	protein_coding	protein_coding	protein_coding,retained_intron	NA	NA	NA
ENSMUSG00000058076	Sdhc	1.86e-05	-1.20242	protein_coding	protein_coding	protein_coding	NA	NA	NA
ENSMUSG00000074476	Spc24	0.000693211	-1.20211	protein_coding	protein_coding	protein_coding,retained_intron	NA	NA	NA
ENSMUSG00000047604	Frat2	1.18e-05	-1.20123	protein_coding	protein_coding	protein_coding	NA	NA	NA
ENSMUSG00000035769	Xylb	3.21e-08	-1.19941	protein_coding	protein_coding	protein_coding,nonsense_mediated_decay,processed_transcript,retained_intron	NA	NA	NA
ENSMUSG00000025465	Echs1	0.000484074	-1.19928	protein_coding	protein_coding	protein_coding,retained_intron,processed_transcript	NA	NA	NA
ENSMUSG00000044367	Slc16a13	0.000429537	-1.19826	protein_coding	protein_coding	protein_coding	NA	NA	NA
ENSMUSG00000030103	Bhlhe40	0.00178718	-1.19748	protein_coding	protein_coding	protein_coding,retained_intron	NA	NA	NA
ENSMUSG00000021213	Akr1c13	2e-07	-1.19667	protein_coding	protein_coding	nonsense_mediated_decay,protein_coding,processed_transcript	NA	NA	NA
ENSMUSG00000030946	Lhpp	0.00291313	-1.19641	protein_coding	protein_coding	nonsense_mediated_decay,protein_coding,processed_transcript,retained_intron	NA	NA	NA
ENSMUSG00000025477	Inpp5a	1.55e-05	-1.19552	protein_coding	protein_coding	protein_coding,processed_transcript,retained_intron	NA	NA	NA
ENSMUSG00000032014	Oaf	0.00288993	-1.19469	protein_coding	protein_coding	protein_coding,retained_intron	NA	NA	NA
ENSMUSG00000093901	Olfr893	0.0382655	-1.19451	protein_coding	protein_coding	protein_coding	NA	NA	NA
ENSMUSG00000036875	Dna2	5.22e-08	-1.19356	protein_coding	protein_coding	protein_coding,nonsense_mediated_decay,retained_intron	NA	NA	NA
ENSMUSG00000020658	Efr3b	0.0133079	-1.19265	protein_coding	protein_coding	protein_coding	NA	NA	NA
ENSMUSG00000037474	Dtl	0.00364335	-1.19056	protein_coding	protein_coding	nonsense_mediated_decay,protein_coding,processed_transcript,retained_intron	NA	NA	NA
ENSMUSG00000111187	RP23-386F15.2	0.0293456	-1.18998	protein_coding	protein_coding	nonsense_mediated_decay,protein_coding	NA	NA	NA
ENSMUSG00000026107	Nabp1	5.83e-07	-1.18867	protein_coding	protein_coding	nonsense_mediated_decay,protein_coding,retained_intron	NA	NA	NA
ENSMUSG00000035107	Dcbld2	0.0311301	-1.18753	protein_coding	protein_coding	protein_coding,processed_transcript,retained_intron	NA	NA	NA
ENSMUSG00000013418	B4galnt2	5.19e-05	-1.18731	protein_coding	protein_coding	protein_coding	NA	NA	NA
ENSMUSG00000070777	Ceacam20	0.0273807	-1.187	protein_coding	protein_coding	protein_coding	NA	NA	NA
ENSMUSG00000033685	Ucp2	3.83e-09	-1.18566	protein_coding	protein_coding	protein_coding,processed_transcript,retained_intron	NA	NA	NA
ENSMUSG00000031937	Vstm5	0.00022102	-1.18564	protein_coding	protein_coding	protein_coding	NA	NA	NA
ENSMUSG00000028403	Zdhhc21	0.00106663	-1.18465	protein_coding	protein_coding	protein_coding,nonsense_mediated_decay,retained_intron	NA	NA	NA
ENSMUSG00000026260	Ndufa10	0.000877581	-1.18442	protein_coding	protein_coding	protein_coding,nonsense_mediated_decay,retained_intron,processed_transcript	NA	NA	NA
ENSMUSG00000040204	2810417H13Rik	0.000710377	-1.1844	protein_coding	protein_coding	protein_coding,retained_intron	NA	NA	NA
ENSMUSG00000020572	Nampt	9.76e-10	-1.18269	protein_coding	protein_coding	protein_coding	NA	NA	NA
ENSMUSG00000005514	Por	0.00065116	-1.18148	protein_coding	protein_coding	protein_coding,processed_transcript,retained_intron	NA	NA	NA
ENSMUSG00000038838	Vars2	5.83e-07	-1.18141	protein_coding	protein_coding	protein_coding,retained_intron,nonsense_mediated_decay	NA	NA	NA
ENSMUSG00000031584	Gsr	1.01e-05	-1.18005	protein_coding	protein_coding	processed_transcript,protein_coding	NA	NA	NA
ENSMUSG00000027424	Mgme1	0.00013031	-1.17991	protein_coding	protein_coding	protein_coding	NA	NA	NA
ENSMUSG00000031453	Rasa3	0.000515557	-1.17957	protein_coding	protein_coding	protein_coding,retained_intron,nonsense_mediated_decay	NA	NA	NA
ENSMUSG00000016495	Plgrkt	0.00638325	-1.17936	protein_coding	protein_coding	protein_coding,retained_intron,processed_transcript	NA	NA	NA
ENSMUSG00000028312	Smc2	4.18e-05	-1.1793	protein_coding	protein_coding	protein_coding,processed_transcript	NA	NA	NA
ENSMUSG00000032908	Sgpp2	1.72e-09	-1.17895	protein_coding	protein_coding	protein_coding	NA	NA	NA
ENSMUSG00000072214	2005-09-01	4.61e-05	-1.17832	protein_coding	protein_coding	protein_coding	NA	NA	NA
ENSMUSG00000078185	Chml	5.89e-06	-1.17741	protein_coding	protein_coding	protein_coding	NA	NA	NA
ENSMUSG00000040875	Osbpl10	1.8e-08	-1.17707	protein_coding	protein_coding	protein_coding,nonsense_mediated_decay,processed_transcript	NA	NA	NA
ENSMUSG00000049690	Nckap5	0.00405186	-1.17668	protein_coding	protein_coding	protein_coding,processed_transcript,retained_intron	NA	NA	NA
ENSMUSG00000026199	Ankzf1	6.18e-09	-1.17536	protein_coding	protein_coding	retained_intron,nonsense_mediated_decay,protein_coding	NA	NA	NA
ENSMUSG00000056698	Elmod3	0.000155954	-1.17498	protein_coding	protein_coding	protein_coding,processed_transcript	NA	NA	NA
ENSMUSG00000029177	Cenpa	0.000384499	-1.17436	protein_coding	protein_coding	protein_coding,nonsense_mediated_decay,retained_intron	NA	NA	NA
ENSMUSG00000006179	Prss16	0.00407543	-1.17278	protein_coding	protein_coding	protein_coding,processed_transcript	NA	NA	NA
ENSMUSG00000021176	Efcab11	0.000841331	-1.1722	protein_coding	protein_coding	protein_coding	NA	NA	NA
ENSMUSG00000009863	Sdhb	0.00232029	-1.16924	protein_coding	protein_coding	protein_coding,processed_transcript	NA	NA	NA
ENSMUSG00000032400	Zwilch	0.0046187	-1.16913	protein_coding	protein_coding	protein_coding,retained_intron,nonsense_mediated_decay	NA	NA	NA
ENSMUSG00000028179	Cth	0.00142293	-1.16782	protein_coding	protein_coding	protein_coding,processed_transcript,retained_intron	NA	NA	NA
ENSMUSG00000038379	Ttk	5.8e-05	-1.16756	protein_coding	protein_coding	retained_intron,protein_coding,processed_transcript	NA	NA	NA
ENSMUSG00000057229	Atp5sl	8.32e-05	-1.16704	protein_coding	protein_coding	protein_coding,retained_intron,nonsense_mediated_decay,processed_transcript	NA	NA	NA
ENSMUSG00000025001	Hells	0.00061097	-1.16676	protein_coding	protein_coding	protein_coding,retained_intron,processed_transcript	NA	NA	NA
ENSMUSG00000103421	Golt1a	0.000147876	-1.16599	protein_coding	protein_coding	protein_coding	NA	NA	NA
ENSMUSG00000020334	Slc22a4	0.0450234	-1.16588	protein_coding	protein_coding	protein_coding,processed_transcript	NA	NA	NA
ENSMUSG00000047735	Samd9l	0.0013454	-1.16539	protein_coding	protein_coding	protein_coding	NA	NA	NA
ENSMUSG00000035181	Heatr5a	8.01e-10	-1.1643	protein_coding	protein_coding	protein_coding	NA	NA	NA
ENSMUSG00000034853	Acot11	0.00745615	-1.16411	protein_coding	protein_coding	protein_coding,nonsense_mediated_decay,processed_transcript	NA	NA	NA
ENSMUSG00000022244	Amacr	2.89e-08	-1.16248	protein_coding	protein_coding	protein_coding	NA	NA	NA
ENSMUSG00000032018	Sc5d	4.92e-06	-1.16128	protein_coding	protein_coding	protein_coding	NA	NA	NA
[truncated: 2,136 more rows]

## Sheet: goblet_v_conventional
target_id	gene_name	qval	log2fc	final_annotation	known_gene_type	known_transcript_type	novel_gene_type	novel_gene_transcript_type	novel_gene_transcript_class_code
ENSMUSG00000106095	2010110G14Rik	0.0108248	-3.57121	lncRNA	lncRNA	lncRNA	NA	NA	NA
ENSMUSG00000042976	9930038B18Rik	7.65e-06	-2.97499	lncRNA	lncRNA	lncRNA	NA	NA	NA
ENSMUSG00000106634	Gm43042	1.02e-14	-2.9035	lncRNA	lncRNA	lncRNA	NA	NA	NA
ENSMUSG00000097932	C430039J16Rik	0.00095479	-2.70726	lncRNA	lncRNA	lncRNA	NA	NA	NA
ENSMUSG00000087179	Gm14230	3.6e-07	-2.62078	lncRNA	lncRNA	lncRNA	NA	NA	NA
ENSMUSG00000104557	Gm36520	0.0224171	-2.57184	lncRNA	lncRNA	lncRNA	NA	NA	NA
ENSMUSG00000096954	Gdap10	0.00161887	-2.52999	lncRNA	lncRNA	lncRNA	NA	NA	NA
ENSMUSG00000107879	9330102E08Rik	0.00172346	-2.42211	lncRNA	lncRNA	lncRNA	NA	NA	NA
ENSMUSG00000106658	Gm42426	6.6e-09	-2.41049	lncRNA	lncRNA	lncRNA	NA	NA	NA
ENSMUSG00000097415	AU020206	1.26e-10	-2.17428	lncRNA	lncRNA	lncRNA	NA	NA	NA
ENSMUSG00000110631	RP24-286J21.7	1.81e-09	-2.13565	lncRNA	lncRNA	lncRNA	NA	NA	NA
ENSMUSG00000097313	Gm26569	0.0210107	-2.06289	lncRNA	lncRNA	lncRNA	NA	NA	NA
ENSMUSG00000097519	4930558J18Rik	0.000227856	-2.00425	lncRNA	lncRNA	lncRNA	NA	NA	NA
ENSMUSG00000109936	RP23-145I16.5	0.0155998	-1.95582	lncRNA	lncRNA	lncRNA	NA	NA	NA
ENSMUSG00000086610	Gm15408	0.00205592	-1.93901	lncRNA	lncRNA	lncRNA	NA	NA	NA
ENSMUSG00000097604	Gm17322	0.00774097	-1.86742	lncRNA	lncRNA	lncRNA	NA	NA	NA
ENSMUSG00000097414	B130046B21Rik	0.00806696	-1.81803	lncRNA	lncRNA	lncRNA	NA	NA	NA
ENSMUSG00000105105	Gm31363	0.000330696	-1.74193	lncRNA	lncRNA	lncRNA	NA	NA	NA
ENSMUSG00000084797	Gm14321	0.0357486	-1.7002	lncRNA	lncRNA	lncRNA	NA	NA	NA
ENSMUSG00000102011	Gm28930	1.94e-09	-1.55057	lncRNA	lncRNA	lncRNA	NA	NA	NA
ENSMUSG00000097632	4930552P12Rik	0.0369607	-1.52216	lncRNA	lncRNA	lncRNA	NA	NA	NA
ENSMUSG00000075511	1700001L05Rik	1.3e-11	-1.44339	lncRNA	lncRNA	lncRNA	NA	NA	NA
ENSMUSG00000111857	RP23-392I13.13	0.00348332	-1.42101	lncRNA	lncRNA	lncRNA	NA	NA	NA
ENSMUSG00000097887	Gm26542	0.00022502	-1.38679	lncRNA	lncRNA	lncRNA	NA	NA	NA
ENSMUSG00000097709	2810429I04Rik	0.001243	-1.35966	lncRNA	lncRNA	lncRNA	NA	NA	NA
ENSMUSG00000110866	RP23-212C9.3	0.0023404	-1.32736	lncRNA	lncRNA	lncRNA	NA	NA	NA
ENSMUSG00000097180	2700038G22Rik	0.00398011	-1.31278	lncRNA	lncRNA	lncRNA	NA	NA	NA
ENSMUSG00000097515	1700040D17Rik	0.0294927	-1.24376	lncRNA	lncRNA	lncRNA	NA	NA	NA
ENSMUSG00000097571	Jpx	0.00816667	-1.21659	lncRNA	lncRNA	lncRNA	NA	NA	NA
ENSMUSG00000097577	6230400D17Rik	0.0202459	-1.20392	lncRNA	lncRNA	lncRNA	NA	NA	NA
ENSMUSG00000086503	Xist	5.21e-06	-1.1916	lncRNA	lncRNA	lncRNA	NA	NA	NA
ENSMUSG00000074863	Platr25	0.0154894	-1.12288	lncRNA	lncRNA	lncRNA	NA	NA	NA
ENSMUSG00000097284	4930480K23Rik	0.0294788	-1.08477	lncRNA	lncRNA	lncRNA	NA	NA	NA
ENSMUSG00000103067	Gm30414	0.0240182	-1.05357	lncRNA	lncRNA	lncRNA	NA	NA	NA
ENSMUSG00000108084	Gm7932	0.0119838	1.009	lncRNA	lncRNA	lncRNA	NA	NA	NA
ENSMUSG00000097059	Fam120aos	9.29e-06	1.09445	lncRNA	lncRNA	lncRNA	NA	NA	NA
ENSMUSG00000111840	RP24-216P6.3	0.0231794	1.11355	lncRNA	lncRNA	lncRNA	NA	NA	NA
ENSMUSG00000107728	Gm43949	3.31e-06	1.14214	lncRNA	lncRNA	lncRNA	NA	NA	NA
ENSMUSG00000087404	Gm11752	0.0288477	1.164	lncRNA	lncRNA	lncRNA	NA	NA	NA
ENSMUSG00000111225	RP23-268C22.3	0.0476808	1.25541	lncRNA	lncRNA	lncRNA	NA	NA	NA
ENSMUSG00000097561	4632411P08Rik	0.000382536	1.29803	lncRNA	lncRNA	lncRNA	NA	NA	NA
ENSMUSG00000097305	Gm17276	0.00123473	1.32274	lncRNA	lncRNA	lncRNA	NA	NA	NA
ENSMUSG00000105957	Gm43254	0.00146811	1.35219	lncRNA	lncRNA	lncRNA	NA	NA	NA
ENSMUSG00000069713	4933406P04Rik	0.0408424	1.37007	lncRNA	lncRNA	lncRNA	NA	NA	NA
ENSMUSG00000111043	RP23-128A23.2	0.00458017	1.41236	lncRNA	lncRNA	lncRNA	NA	NA	NA
ENSMUSG00000104818	Gm43661	0.00391459	1.41569	lncRNA	lncRNA	lncRNA	NA	NA	NA
ENSMUSG00000085329	2810404F17Rik	0.0375944	1.45883	lncRNA	lncRNA	lncRNA	NA	NA	NA
ENSMUSG00000100022	Gm29590	0.0269003	1.47032	lncRNA	lncRNA	lncRNA	NA	NA	NA
ENSMUSG00000097056	Gm4262	2.36e-08	1.48259	lncRNA	lncRNA	lncRNA	NA	NA	NA
ENSMUSG00000110231	Gm6329	0.0181705	1.48513	lncRNA	lncRNA	lncRNA	NA	NA	NA
ENSMUSG00000110276	Gm45330	5.96e-18	1.55157	lncRNA	lncRNA	lncRNA	NA	NA	NA
ENSMUSG00000099552	9830004L10Rik	0.00104896	1.64554	lncRNA	lncRNA	lncRNA	NA	NA	NA
ENSMUSG00000099364	5730419F03Rik	0.00708628	1.85674	lncRNA	lncRNA	lncRNA	NA	NA	NA
ENSMUSG00000097131	D230017M19Rik	0.00497868	1.86052	lncRNA	lncRNA	lncRNA	NA	NA	NA
ENSMUSG00000085183	Gm12603	0.00108416	1.88984	lncRNA	lncRNA	lncRNA	NA	NA	NA
ENSMUSG00000086782	E130102H24Rik	0.0190572	1.89814	lncRNA	lncRNA	lncRNA	NA	NA	NA
ENSMUSG00000111528	RP24-499N24.6	0.00684138	2.00226	lncRNA	lncRNA	lncRNA	NA	NA	NA
ENSMUSG00000078956	Gm14221	0.000782122	2.03007	lncRNA	lncRNA	lncRNA	NA	NA	NA
ENSMUSG00000097575	Gm26796	0.00516829	2.18875	lncRNA	lncRNA	lncRNA	NA	NA	NA
ENSMUSG00000097243	Gm26908	1.4e-05	2.2371	lncRNA	lncRNA	lncRNA	NA	NA	NA
ENSMUSG00000097767	Miat	0.00189464	2.30461	lncRNA	lncRNA	lncRNA	NA	NA	NA
ENSMUSG00000108801	Gm44514	0.0124278	2.30627	lncRNA	lncRNA	lncRNA	NA	NA	NA
ENSMUSG00000087196	Gm13373	2.36e-05	2.36916	lncRNA	lncRNA	lncRNA	NA	NA	NA
ENSMUSG00000085152	Gm11496	3.93e-05	2.45221	lncRNA	lncRNA	lncRNA	NA	NA	NA
ENSMUSG00000097527	1700112J16Rik	0.000619096	2.57927	lncRNA	lncRNA	lncRNA	NA	NA	NA
ENSMUSG00000109957	Gm45353	0.00486648	2.60792	lncRNA	lncRNA	lncRNA	NA	NA	NA
ENSMUSG00000108845	Gm45090	1.08e-26	2.65702	lncRNA	lncRNA	lncRNA	NA	NA	NA
ENSMUSG00000086847	Tbx3os2	0.0145709	2.70002	lncRNA	lncRNA	lncRNA	NA	NA	NA
ENSMUSG00000074274	D930028M14Rik	9.93e-06	2.73044	lncRNA	lncRNA	lncRNA	NA	NA	NA
ENSMUSG00000103965	Gm30173	0.00733963	2.76765	lncRNA	lncRNA	lncRNA	NA	NA	NA
ENSMUSG00000099025	Gm27162	5.89e-20	2.88987	lncRNA	lncRNA	lncRNA	NA	NA	NA
ENSMUSG00000071567	A830039N20Rik	0.000513231	3.02784	lncRNA	lncRNA	lncRNA	NA	NA	NA
ENSMUSG00000106139	Gm43194	1.83e-07	3.02998	lncRNA	lncRNA	lncRNA	NA	NA	NA
ENSMUSG00000086141	9030622O22Rik	3.36e-16	3.05015	lncRNA	lncRNA	lncRNA	NA	NA	NA
ENSMUSG00000089712	Gm15889	9.97e-21	3.15158	lncRNA	lncRNA	lncRNA	NA	NA	NA
ENSMUSG00000103043	Gm37306	2.98e-15	3.19972	lncRNA	lncRNA	lncRNA	NA	NA	NA
ENSMUSG00000075010	AW112010	2.25e-08	3.37889	lncRNA	lncRNA	lncRNA	NA	NA	NA
ENSMUSG00000099148	Gm3331	2.12e-05	3.46943	lncRNA	lncRNA	lncRNA	NA	NA	NA
ENSMUSG00000096944	Gm26722	0.00374096	3.59298	lncRNA	lncRNA	lncRNA	NA	NA	NA
ENSMUSG00000066176	Gm12511	1.75e-22	3.61364	lncRNA	lncRNA	lncRNA	NA	NA	NA
ENSMUSG00000102123	Gm4319	0.000747642	3.82681	lncRNA	lncRNA	lncRNA	NA	NA	NA
ENSMUSG00000085007	Gm11549	1.25e-06	3.83681	lncRNA	lncRNA	lncRNA	NA	NA	NA
ENSMUSG00000087211	Lhx1os	1.57e-08	3.85274	lncRNA	lncRNA	lncRNA	NA	NA	NA
ENSMUSG00000096299	Gm21814	4.89e-05	4.10877	lncRNA	lncRNA	lncRNA	NA	NA	NA
ENSMUSG00000105146	Gm43861	1.14e-10	4.33673	lncRNA	lncRNA	lncRNA	NA	NA	NA
mmu-miR-3103-3p	mmu-miR-3103-3p	0.000382	-5.91468	miRNA	miRNA	miRNA	#N/A	#N/A	#N/A
mmu-miR-15a-3p	mmu-miR-15a-3p	0.0181	-5.26858	miRNA	miRNA	miRNA	#N/A	#N/A	#N/A
mmu-miR-1291	mmu-miR-1291	0.0174	-5.13293	miRNA	miRNA	miRNA	#N/A	#N/A	#N/A
mmu-miR-218-5p	mmu-miR-218-5p	3.19e-05	-2.00406	miRNA	miRNA	miRNA	#N/A	#N/A	#N/A
mmu-miR-222-5p	mmu-miR-222-5p	0.00192	-1.82578	miRNA	miRNA	miRNA	#N/A	#N/A	#N/A
mmu-miR-3535	mmu-miR-3535	0.00429	-1.7459	miRNA	miRNA	miRNA	#N/A	#N/A	#N/A
mmu-miR-210-5p	mmu-miR-210-5p	0.00784	-1.68575	miRNA	miRNA	miRNA	#N/A	#N/A	#N/A
mmu-miR-147-3p	mmu-miR-147-3p	0.0305	-1.66041	miRNA	miRNA	miRNA	#N/A	#N/A	#N/A
mmu-miR-449c-5p	mmu-miR-449c-5p	0.0145	-1.48198	miRNA	miRNA	miRNA	#N/A	#N/A	#N/A
mmu-miR-677-5p	mmu-miR-677-5p	0.0157	-1.44561	miRNA	miRNA	miRNA	#N/A	#N/A	#N/A
mmu-miR-221-5p	mmu-miR-221-5p	0.0464	-1.38707	miRNA	miRNA	miRNA	#N/A	#N/A	#N/A
mmu-miR-210-3p	mmu-miR-210-3p	0.0214	-1.37446	miRNA	miRNA	miRNA	#N/A	#N/A	#N/A
mmu-miR-3105-3p	mmu-miR-3105-3p	0.0495	-1.19109	miRNA	miRNA	miRNA	#N/A	#N/A	#N/A
mmu-miR-222-3p	mmu-miR-222-3p	0.00945	-1.08729	miRNA	miRNA	miRNA	#N/A	#N/A	#N/A
mmu-miR-130a-3p	mmu-miR-130a-3p	0.0145	-1.00447	miRNA	miRNA	miRNA	#N/A	#N/A	#N/A
mmu-miR-101c	mmu-miR-101c	0.0386	1.02951	miRNA	miRNA	miRNA	#N/A	#N/A	#N/A
mmu-miR-101a-3p	mmu-miR-101a-3p	0.0386	1.02951	miRNA	miRNA	miRNA	#N/A	#N/A	#N/A
mmu-miR-125a-5p	mmu-miR-125a-5p	0.0449	1.04533	miRNA	miRNA	miRNA	#N/A	#N/A	#N/A
mmu-let-7e-5p	mmu-let-7e-5p	0.00136	1.32153	miRNA	miRNA	miRNA	#N/A	#N/A	#N/A
mmu-miR-598-3p	mmu-miR-598-3p	0.0268	1.32775	miRNA	miRNA	miRNA	#N/A	#N/A	#N/A
mmu-miR-676-3p	mmu-miR-676-3p	0.0079	1.3303	miRNA	miRNA	miRNA	#N/A	#N/A	#N/A
mmu-miR-700-5p	mmu-miR-700-5p	0.02	1.38291	miRNA	miRNA	miRNA	#N/A	#N/A	#N/A
mmu-miR-187-3p	mmu-miR-187-3p	0.0157	1.39324	miRNA	miRNA	miRNA	#N/A	#N/A	#N/A
mmu-miR-497a-5p	mmu-miR-497a-5p	0.00136	1.512	miRNA	miRNA	miRNA	#N/A	#N/A	#N/A
mmu-miR-152-5p	mmu-miR-152-5p	0.00172	1.64737	miRNA	miRNA	miRNA	#N/A	#N/A	#N/A
mmu-miR-195a-5p	mmu-miR-195a-5p	0.00275	1.7204	miRNA	miRNA	miRNA	#N/A	#N/A	#N/A
mmu-miR-700-3p	mmu-miR-700-3p	9.04e-05	1.78992	miRNA	miRNA	miRNA	#N/A	#N/A	#N/A
mmu-miR-7a-5p	mmu-miR-7a-5p	6.87e-08	1.9087	miRNA	miRNA	miRNA	#N/A	#N/A	#N/A
mmu-miR-212-5p	mmu-miR-212-5p	0.034	2.03119	miRNA	miRNA	miRNA	#N/A	#N/A	#N/A
mmu-miR-6969-3p	mmu-miR-6969-3p	0.000161	2.11927	miRNA	miRNA	miRNA	#N/A	#N/A	#N/A
mmu-miR-152-3p	mmu-miR-152-3p	1.59e-06	2.13871	miRNA	miRNA	miRNA	#N/A	#N/A	#N/A
mmu-miR-574-3p	mmu-miR-574-3p	2.11e-08	2.17062	miRNA	miRNA	miRNA	#N/A	#N/A	#N/A
mmu-miR-212-3p	mmu-miR-212-3p	0.00361	2.1743	miRNA	miRNA	miRNA	#N/A	#N/A	#N/A
mmu-miR-375-3p	mmu-miR-375-3p	1.06e-08	2.37188	miRNA	miRNA	miRNA	#N/A	#N/A	#N/A
mmu-miR-350-5p	mmu-miR-350-5p	0.00218	2.42263	miRNA	miRNA	miRNA	#N/A	#N/A	#N/A
mmu-miR-195a-3p	mmu-miR-195a-3p	0.0377	2.49772	miRNA	miRNA	miRNA	#N/A	#N/A	#N/A
mmu-miR-434-3p	mmu-miR-434-3p	1.14e-06	2.77951	miRNA	miRNA	miRNA	#N/A	#N/A	#N/A
mmu-miR-375-5p	mmu-miR-375-5p	3.66e-07	2.78488	miRNA	miRNA	miRNA	#N/A	#N/A	#N/A
mmu-miR-139-3p	mmu-miR-139-3p	0.00361	2.84164	miRNA	miRNA	miRNA	#N/A	#N/A	#N/A
mmu-miR-1224-3p	mmu-miR-1224-3p	0.01	2.84207	miRNA	miRNA	miRNA	#N/A	#N/A	#N/A
mmu-miR-153-3p	mmu-miR-153-3p	2.05e-06	2.84263	miRNA	miRNA	miRNA	#N/A	#N/A	#N/A
mmu-miR-411-5p	mmu-miR-411-5p	1.03e-05	3.07049	miRNA	miRNA	miRNA	#N/A	#N/A	#N/A
mmu-miR-409-3p	mmu-miR-409-3p	4.28e-07	3.22782	miRNA	miRNA	miRNA	#N/A	#N/A	#N/A
mmu-miR-127-3p	mmu-miR-127-3p	4.98e-11	3.25353	miRNA	miRNA	miRNA	#N/A	#N/A	#N/A
mmu-miR-7b-5p	mmu-miR-7b-5p	4.67e-16	3.35757	miRNA	miRNA	miRNA	#N/A	#N/A	#N/A
mmu-miR-139-5p	mmu-miR-139-5p	3.18e-19	3.36827	miRNA	miRNA	miRNA	#N/A	#N/A	#N/A
mmu-miR-7a-2-3p	mmu-miR-7a-2-3p	4.2e-21	3.69477	miRNA	miRNA	miRNA	#N/A	#N/A	#N/A
mmu-miR-184-3p	mmu-miR-184-3p	3.25e-15	3.73187	miRNA	miRNA	miRNA	#N/A	#N/A	#N/A
mmu-miR-541-5p	mmu-miR-541-5p	5.64e-17	3.83768	miRNA	miRNA	miRNA	#N/A	#N/A	#N/A
mmu-miR-1224-5p	mmu-miR-1224-5p	8.53e-20	4.01689	miRNA	miRNA	miRNA	#N/A	#N/A	#N/A
mmu-miR-540-3p	mmu-miR-540-3p	0.0441	5.05872	miRNA	miRNA	miRNA	#N/A	#N/A	#N/A
mmu-miR-125b-1-3p	mmu-miR-125b-1-3p	0.0303	5.2534	miRNA	miRNA	miRNA	#N/A	#N/A	#N/A
mmu-miR-7b-3p	mmu-miR-7b-3p	0.00497	5.77338	miRNA	miRNA	miRNA	#N/A	#N/A	#N/A
mmu-miR-3547-3p	mmu-miR-3547-3p	0.00192	5.80809	miRNA	miRNA	miRNA	#N/A	#N/A	#N/A
mmu-miR-410-3p	mmu-miR-410-3p	7.02e-06	6.63257	miRNA	miRNA	miRNA	#N/A	#N/A	#N/A
mmu-miR-1945	mmu-miR-1945	1.14e-06	6.80533	miRNA	miRNA	miRNA	#N/A	#N/A	#N/A
mmu-miR-434-5p	mmu-miR-434-5p	4.45e-07	6.85015	miRNA	miRNA	miRNA	#N/A	#N/A	#N/A
mmu-miR-134-5p	mmu-miR-134-5p	5.79e-08	7.01691	miRNA	miRNA	miRNA	#N/A	#N/A	#N/A
ENSMUSG00000098426	Gm27149	5.21e-07	-10.5681	other	unprocessed_pseudogene	unprocessed_pseudogene	NA	NA	NA
ENSMUSG00000083405	Gm15725	0.0142805	-6.74744	other	transcribed_processed_pseudogene	transcribed_processed_pseudogene	NA	NA	NA
ENSMUSG00000107992	Gm44223	3.75e-09	-5.25941	other	unprocessed_pseudogene	unprocessed_pseudogene	NA	NA	NA
ENSMUSG00000102224	4930447F24Rik	0.00910719	-3.54274	other	processed_transcript	antisense,retained_intron	NA	NA	NA
ENSMUSG00000085483	Gm14198	0.0468172	-2.73808	other	antisense	antisense	NA	NA	NA
ENSMUSG00000104348	Gm37691	0.000457533	-2.70471	other	TEC	TEC	NA	NA	NA
ENSMUSG00000106001	Gm42826	0.0109904	-2.53714	other	TEC	TEC	NA	NA	NA
ENSMUSG00000077714	Snord17	0.000433021	-2.53358	other	snoRNA	snoRNA	NA	NA	NA
ENSMUSG00000089812	Gm15867	0.0273579	-2.20088	other	antisense	antisense	NA	NA	NA
ENSMUSG00000107429	Gm44206	2.78e-06	-2.19106	other	antisense	antisense	NA	NA	NA
ENSMUSG00000107278	Gm42600	0.0364584	-2.08294	other	TEC	TEC	NA	NA	NA
ENSMUSG00000104090	Gm34267	0.00197919	-2.06813	other	TEC	TEC	NA	NA	NA
ENSMUSG00000110456	RP23-91H23.4	0.0186546	-2.04876	other	TEC	TEC	NA	NA	NA
ENSMUSG00000104563	Gm43041	6.65e-05	-2.02768	other	TEC	TEC	NA	NA	NA
ENSMUSG00000108366	Gm5586	0.0383735	-1.98615	other	processed_pseudogene	processed_pseudogene	NA	NA	NA
ENSMUSG00000081137	BC022960	0.000417215	-1.93676	other	transcribed_processed_pseudogene	transcribed_processed_pseudogene	NA	NA	NA
ENSMUSG00000081392	Gm11668	0.0256744	-1.91507	other	processed_pseudogene	processed_pseudogene	NA	NA	NA
ENSMUSG00000104344	Gm38077	0.00888682	-1.9103	other	TEC	TEC	NA	NA	NA
ENSMUSG00000097493	9930014A18Rik	1.52e-09	-1.89677	other	processed_transcript	antisense,TEC	NA	NA	NA
ENSMUSG00000093726	Gm20667	1.26e-06	-1.82875	other	sense_overlapping	sense_overlapping	NA	NA	NA
ENSMUSG00000078586	Gm11735	9.88e-06	-1.82608	other	unprocessed_pseudogene	unprocessed_pseudogene	NA	NA	NA
ENSMUSG00000086591	Dnah2os	0.00474843	-1.75367	other	antisense	antisense	NA	NA	NA
ENSMUSG00000103313	Gm38357	0.0373453	-1.73503	other	TEC	TEC	NA	NA	NA
ENSMUSG00000102780	Gm38253	0.00702625	-1.72788	other	TEC	TEC	NA	NA	NA
ENSMUSG00000111631	RP23-413J12.1	0.024744	-1.70379	other	processed_transcript	processed_transcript	NA	NA	NA
ENSMUSG00000110148	RP23-106I21.5	0.0117971	-1.70084	other	processed_transcript	antisense,retained_intron	NA	NA	NA
ENSMUSG00000075611	Gm11545	3.18e-07	-1.66622	other	unprocessed_pseudogene	unprocessed_pseudogene	NA	NA	NA
ENSMUSG00000106682	Gm42648	0.0260723	-1.57615	other	TEC	TEC	NA	NA	NA
ENSMUSG00000111619	RP23-319C8.5	3.53e-09	-1.53904	other	processed_pseudogene	processed_pseudogene	NA	NA	NA
ENSMUSG00000074039	4930520O04Rik	0.0237165	-1.45486	other	processed_transcript	processed_transcript	NA	NA	NA
ENSMUSG00000055134	9130017K11Rik	4.93e-08	-1.4433	other	processed_transcript	processed_transcript	NA	NA	NA
ENSMUSG00000082163	Gm14276	7.56e-07	-1.43993	other	processed_pseudogene	processed_pseudogene	NA	NA	NA
ENSMUSG00000098090	2700099C18Rik	2.16e-05	-1.43398	other	transcribed_unprocessed_pseudogene	processed_transcript,transcribed_unprocessed_pseudogene	NA	NA	NA
ENSMUSG00000087060	Eldr	6.96e-05	-1.43237	other	processed_transcript	processed_transcript	NA	NA	NA
ENSMUSG00000085705	Gm16046	0.0259185	-1.41733	other	processed_transcript	processed_transcript	NA	NA	NA
ENSMUSG00000093405	Gm20684	0.00989093	-1.41435	other	bidirectional_promoter_lncRNA	bidirectional_promoter_lncRNA	NA	NA	NA
ENSMUSG00000087142	Gm12454	0.00471013	-1.40959	other	antisense	antisense	NA	NA	NA
ENSMUSG00000104136	Gm36955	0.00309065	-1.38634	other	TEC	TEC	NA	NA	NA
ENSMUSG00000099478	Gm28370	0.0213135	-1.32918	other	antisense	antisense	NA	NA	NA
ENSMUSG00000099474	1700097N02Rik	0.00266363	-1.32008	other	antisense	antisense	NA	NA	NA
ENSMUSG00000097967	Gm27002	0.0485526	-1.2465	other	sense_intronic	sense_intronic	NA	NA	NA
ENSMUSG00000070960	Gm19680	0.000126952	-1.23817	other	processed_pseudogene	processed_pseudogene	NA	NA	NA
ENSMUSG00000085614	1700123M08Rik	0.0374661	-1.2246	other	processed_transcript	processed_transcript	NA	NA	NA
ENSMUSG00000087366	Junos	0.0195459	-1.22067	other	antisense	antisense	NA	NA	NA
ENSMUSG00000045327	6330549D23Rik	0.00814347	-1.18498	other	transcribed_processed_pseudogene	processed_transcript,transcribed_processed_pseudogene	NA	NA	NA
ENSMUSG00000087367	Gm15491	0.0476808	-1.18456	other	antisense	antisense	NA	NA	NA
ENSMUSG00000085890	Tnfsf13os	0.0103787	-1.15919	other	antisense	antisense	NA	NA	NA
ENSMUSG00000093606	B130034C11Rik	0.00785029	-1.1282	other	processed_transcript	retained_intron,processed_transcript	NA	NA	NA
ENSMUSG00000064493	Snora28	0.0264517	-1.07529	other	snoRNA	snoRNA	NA	NA	NA
ENSMUSG00000074876	Spata5l1	0.017811	-1.06094	other	processed_transcript	processed_transcript	NA	NA	NA
ENSMUSG00000085105	Gm12758	0.0243181	-1.05907	other	antisense	antisense	NA	NA	NA
ENSMUSG00000073647	Gm10557	0.0286126	-1.01389	other	pseudogene	pseudogene	NA	NA	NA
ENSMUSG00000111394	RP23-320D23.6	1.93e-05	-1.00481	other	TEC	TEC	NA	NA	NA
ENSMUSG00000091575	2010016I18Rik	0.0496141	1.0215	other	processed_transcript	antisense,processed_transcript,retained_intron	NA	NA	NA
ENSMUSG00000085615	A330035P11Rik	0.000123146	1.03299	other	processed_transcript	processed_transcript	NA	NA	NA
ENSMUSG00000085550	Gm15658	0.0252355	1.05154	other	antisense	antisense	NA	NA	NA
ENSMUSG00000049881	2810025M15Rik	0.000209597	1.05342	other	transcribed_processed_pseudogene	processed_transcript,TEC,transcribed_processed_pseudogene	NA	NA	NA
ENSMUSG00000097101	1810034E14Rik	0.0298424	1.05366	other	antisense	antisense	NA	NA	NA
ENSMUSG00000107476	Zfp862-ps	0.000851526	1.06291	other	transcribed_unitary_pseudogene	processed_transcript,transcribed_unitary_pseudogene	NA	NA	NA
ENSMUSG00000099094	Gm19569	0.02379	1.08979	other	processed_transcript	lncRNA,retained_intron	NA	NA	NA
ENSMUSG00000099098	1110035H17Rik	0.0309653	1.11557	other	antisense	pseudogene,antisense	NA	NA	NA
ENSMUSG00000086108	Gm5602	0.0476061	1.13186	other	antisense	antisense	NA	NA	NA
ENSMUSG00000102278	Gm37145	0.00385592	1.1707	other	TEC	TEC	NA	NA	NA
ENSMUSG00000022915	1700093J21Rik	0.00838456	1.23358	other	antisense	antisense	NA	NA	NA
ENSMUSG00000097099	Gm9917	0.0105605	1.23558	other	antisense	antisense	NA	NA	NA
ENSMUSG00000085184	4933439K11Rik	0.0496012	1.2641	other	processed_transcript	lncRNA,antisense	NA	NA	NA
ENSMUSG00000111551	RP24-444M16.3	1.14e-10	1.30549	other	processed_pseudogene	processed_pseudogene	NA	NA	NA
ENSMUSG00000085704	4921531C22Rik	0.00210409	1.33902	other	processed_transcript	processed_transcript	NA	NA	NA
ENSMUSG00000110357	A030001D20Rik	0.0039309	1.35752	other	antisense	antisense	NA	NA	NA
ENSMUSG00000106924	Gm42857	0.00699756	1.39252	other	processed_pseudogene	processed_pseudogene	NA	NA	NA
ENSMUSG00000111521	RP23-228B2.5	2.36e-05	1.42117	other	antisense	antisense	NA	NA	NA
ENSMUSG00000099632	2900093K20Rik	0.00261302	1.42679	other	antisense	antisense	NA	NA	NA
ENSMUSG00000092183	4930515G01Rik	0.00634778	1.42827	other	antisense	antisense	NA	NA	NA
ENSMUSG00000097276	4930525G20Rik	0.00409992	1.44196	other	antisense	antisense	NA	NA	NA
ENSMUSG00000108368	Gm45053	0.0234484	1.45317	other	TEC	TEC	NA	NA	NA
ENSMUSG00000105549	Gm43540	0.00614961	1.45892	other	processed_pseudogene	processed_pseudogene	NA	NA	NA
ENSMUSG00000101462	Gm3052	0.00907005	1.48945	other	transcribed_processed_pseudogene	transcribed_processed_pseudogene,processed_transcript	NA	NA	NA
ENSMUSG00000070392	Gm20634	1.23e-05	1.4993	other	processed_transcript	processed_transcript	NA	NA	NA
ENSMUSG00000106978	N4bp2os	0.00141212	1.52894	other	processed_transcript	antisense,retained_intron	NA	NA	NA
ENSMUSG00000108105	Gm5340	0.0259052	1.53507	other	processed_pseudogene	processed_pseudogene	NA	NA	NA
ENSMUSG00000052403	Fcnaos	0.0210468	1.59493	other	antisense	antisense	NA	NA	NA
ENSMUSG00000093720	Gm20635	0.0167872	1.59758	other	antisense	antisense	NA	NA	NA
ENSMUSG00000105594	Gm43398	0.000311658	1.59946	other	TEC	TEC	NA	NA	NA
ENSMUSG00000106847	Peg13	1.14e-20	1.64132	other	sense_intronic	sense_intronic	NA	NA	NA
ENSMUSG00000085057	Gm13415	0.013437	1.65523	other	processed_transcript	antisense,retained_intron	NA	NA	NA
ENSMUSG00000087433	Gm14167	0.00907005	1.66243	other	antisense	antisense	NA	NA	NA
ENSMUSG00000072809	9330160F10Rik	0.0187745	1.67259	other	antisense	antisense	NA	NA	NA
ENSMUSG00000089769	Gm16574	0.0164372	1.67698	other	processed_pseudogene	processed_pseudogene	NA	NA	NA
ENSMUSG00000086401	Gm15559	0.0145393	1.68382	other	antisense	antisense	NA	NA	NA
ENSMUSG00000102425	Gm26616	0.00488421	1.686	other	TEC	TEC	NA	NA	NA
ENSMUSG00000109956	Gm45428	0.0492273	1.69211	other	TEC	TEC	NA	NA	NA
ENSMUSG00000085603	Gm11346	0.0456905	1.71919	other	transcribed_processed_pseudogene	retained_intron,transcribed_processed_pseudogene,processed_transcript	NA	NA	NA
ENSMUSG00000056411	Gm12500	0.00672957	1.74059	other	antisense	antisense	NA	NA	NA
ENSMUSG00000051074	4930579K19Rik	0.00132427	1.74674	other	processed_transcript	lncRNA,TEC,processed_transcript	NA	NA	NA
ENSMUSG00000074912	Gm14207	0.000107635	1.76473	other	processed_transcript	processed_transcript	NA	NA	NA
ENSMUSG00000110597	RP23-146A22.3	1.9e-06	1.76519	other	transcribed_unprocessed_pseudogene	transcribed_unprocessed_pseudogene,processed_transcript	NA	NA	NA
ENSMUSG00000054909	Wbscr25	0.0268027	1.76566	other	antisense	antisense	NA	NA	NA
ENSMUSG00000085667	Gm12992	0.00236011	1.76814	other	processed_transcript	processed_transcript	NA	NA	NA
ENSMUSG00000106896	G630022F23Rik	0.0216625	1.8236	other	TEC	TEC	NA	NA	NA
ENSMUSG00000105155	Gm42910	0.0218697	1.85479	other	TEC	TEC	NA	NA	NA
ENSMUSG00000051832	E230016K23Rik	0.0221929	1.86724	other	processed_transcript	processed_transcript	NA	NA	NA
ENSMUSG00000111334	RP23-104D6.8	0.000248418	1.8673	other	processed_transcript	lncRNA,retained_intron	NA	NA	NA
ENSMUSG00000110716	RP24-94F12.4	3.91e-05	1.89341	other	bidirectional_promoter_lncRNA	bidirectional_promoter_lncRNA	NA	NA	NA
ENSMUSG00000093394	Gm20621	0.0187501	1.93503	other	sense_overlapping	sense_overlapping	NA	NA	NA
ENSMUSG00000105895	Gm42829	0.0419465	1.94216	other	sense_intronic	sense_intronic	NA	NA	NA
ENSMUSG00000101304	Plet1os	0.000234264	1.95153	other	antisense	antisense	NA	NA	NA
ENSMUSG00000101009	1700108F19Rik	0.0102613	1.97053	other	processed_transcript	lncRNA,retained_intron	NA	NA	NA
ENSMUSG00000106209	Gm42918	0.0296436	2.01176	other	antisense	antisense	NA	NA	NA
ENSMUSG00000108658	Gm45138	2.26e-05	2.01307	other	TEC	TEC	NA	NA	NA
ENSMUSG00000079499	6530402F18Rik	0.00446167	2.03798	other	processed_transcript	processed_transcript	NA	NA	NA
ENSMUSG00000072683	Gm7457	0.00132505	2.03866	other	processed_transcript	antisense,retained_intron	NA	NA	NA
ENSMUSG00000097011	Gm4651	1.21e-05	2.05735	other	processed_transcript	antisense,retained_intron	NA	NA	NA
ENSMUSG00000109899	Gm6012	0.00408196	2.09025	other	processed_pseudogene	processed_pseudogene	NA	NA	NA
ENSMUSG00000086247	Gm15787	0.0117487	2.12744	other	processed_transcript	antisense,processed_transcript	NA	NA	NA
ENSMUSG00000105509	C130013H08Rik	0.0160593	2.16473	other	antisense	antisense	NA	NA	NA
ENSMUSG00000111176	RP23-128A23.3	0.000563874	2.19107	other	TEC	TEC	NA	NA	NA
ENSMUSG00000109780	Gm45447	1.64e-08	2.20105	other	antisense	antisense	NA	NA	NA
ENSMUSG00000081755	Mup-ps23	0.00111392	2.21819	other	processed_pseudogene	processed_pseudogene	NA	NA	NA
ENSMUSG00000086773	Gm16192	0.0175714	2.22198	other	antisense	antisense	NA	NA	NA
ENSMUSG00000085636	Gm11769	0.00644333	2.238	other	processed_transcript	processed_transcript	NA	NA	NA
ENSMUSG00000084839	Gm14097	1.76e-08	2.26615	other	antisense	antisense	NA	NA	NA
ENSMUSG00000085873	Ttc39aos1	2.47e-12	2.26881	other	antisense	antisense	NA	NA	NA
ENSMUSG00000093610	Cyp2c53-ps	0.00340678	2.28936	other	transcribed_unprocessed_pseudogene	processed_transcript,transcribed_unprocessed_pseudogene	NA	NA	NA
ENSMUSG00000105139	Gm43223	0.000496115	2.30276	other	processed_transcript	lncRNA,processed_transcript	NA	NA	NA
ENSMUSG00000092071	A230065N10Rik	0.0424987	2.30753	other	antisense	antisense	NA	NA	NA
ENSMUSG00000097892	Gm26801	5.01e-09	2.36647	other	antisense	antisense	NA	NA	NA
ENSMUSG00000106825	2510016D11Rik	2.66e-05	2.37306	other	TEC	TEC	NA	NA	NA
ENSMUSG00000087476	Rap1gapos	6.05e-10	2.46777	other	antisense	antisense	NA	NA	NA
ENSMUSG00000086923	4930406D18Rik	0.0273054	2.49366	other	processed_transcript	retained_intron,lncRNA	NA	NA	NA
ENSMUSG00000097814	Panct2	0.00666007	2.5121	other	antisense	antisense	NA	NA	NA
ENSMUSG00000071265	1700086L19Rik	1.02e-06	2.51443	other	transcribed_unitary_pseudogene	transcribed_unitary_pseudogene,processed_transcript	NA	NA	NA
ENSMUSG00000073144	4930599N23Rik	0.0222402	2.54868	other	antisense	antisense	NA	NA	NA
ENSMUSG00000053442	4930597O21Rik	0.0137767	2.59158	other	processed_transcript	retained_intron,bidirectional_promoter_lncRNA	NA	NA	NA
ENSMUSG00000086434	Gm15200	8.05e-09	2.60391	other	antisense	antisense	NA	NA	NA
ENSMUSG00000109130	Gm45187	0.00941517	2.76997	other	antisense	antisense	NA	NA	NA
ENSMUSG00000085081	Rptoros	1.62e-12	2.77764	other	antisense	antisense	NA	NA	NA
ENSMUSG00000102059	Gm20257	7.63e-06	2.82317	other	transcribed_unprocessed_pseudogene	processed_transcript,transcribed_unprocessed_pseudogene	NA	NA	NA
ENSMUSG00000081303	Gm16011	6.25e-13	2.83949	other	processed_pseudogene	processed_pseudogene	NA	NA	NA
ENSMUSG00000064043	Trerf1	2.09e-05	2.92516	other	processed_transcript	retained_intron,processed_transcript	NA	NA	NA
ENSMUSG00000056031	9330154J02Rik	0.000886108	3.07751	other	processed_transcript	processed_transcript,antisense,retained_intron	NA	NA	NA
ENSMUSG00000099519	Gm29253	0.011239	3.38165	other	processed_transcript	processed_transcript	NA	NA	NA
ENSMUSG00000086550	Pla2g10os	9.29e-06	3.43243	other	antisense	antisense	NA	NA	NA
ENSMUSG00000085830	Grin1os	1.84e-27	3.4886	other	antisense	antisense	NA	NA	NA
ENSMUSG00000097730	Gm26588	3.21e-07	3.52794	other	antisense	antisense	NA	NA	NA
ENSMUSG00000102184	Gm37192	7.58e-10	3.66919	other	TEC	TEC	NA	NA	NA
ENSMUSG00000103529	A730089K16Rik	1.11e-09	3.68677	other	TEC	TEC	NA	NA	NA
ENSMUSG00000110557	RP23-403G9.9	4.41e-21	3.7777	other	transcribed_unprocessed_pseudogene	transcribed_unprocessed_pseudogene,processed_transcript	NA	NA	NA
ENSMUSG00000090293	Gm17034	0.00309065	3.78795	other	antisense	antisense	NA	NA	NA
ENSMUSG00000108688	Gm44985	2.45e-40	3.90303	other	TEC	TEC	NA	NA	NA
ENSMUSG00000086029	Pax6os1	6.78e-05	4.59034	other	antisense	antisense	NA	NA	NA
MSTRG.15131	MSTRG.15131	8.19e-16	-6.63537	potential_novel_lncRNA	NA	NA	intergenic	intergenic	u
MSTRG.20304	MSTRG.20304	3.13e-27	-6.50008	potential_novel_lncRNA	NA	NA	intergenic	intergenic	u
MSTRG.44632	MSTRG.44632	3.3e-20	-5.54816	potential_novel_lncRNA	NA	NA	intergenic	intergenic	u
MSTRG.23049	MSTRG.23049	8.02e-05	-4.08495	potential_novel_lncRNA	NA	NA	intergenic	intergenic	u
MSTRG.9072	MSTRG.9072	1.67e-05	-3.80502	potential_novel_lncRNA	NA	NA	intergenic	intergenic	o,u
MSTRG.15919	MSTRG.15919	5.06e-09	-3.25948	potential_novel_lncRNA	NA	NA	intergenic	intergenic	u
MSTRG.39343	MSTRG.39343	0.000404708	-3.22333	potential_novel_lncRNA	NA	NA	intergenic	intergenic	u
MSTRG.16934	MSTRG.16934	0.0089104	-3.15544	potential_novel_lncRNA	NA	NA	intergenic	intergenic	u
MSTRG.42726	MSTRG.42726	0.000514611	-3.06989	potential_novel_lncRNA	NA	NA	antisense	antisense	i
MSTRG.9477	MSTRG.9477	6.5e-05	-3.00892	potential_novel_lncRNA	NA	NA	antisense	antisense	i
MSTRG.20217	MSTRG.20217	4.23e-11	-2.93822	potential_novel_lncRNA	NA	NA	antisense	antisense	x
MSTRG.45245	MSTRG.45245	0.00091854	-2.85783	potential_novel_lncRNA	NA	NA	antisense	antisense	i
MSTRG.5396	MSTRG.5396	0.000146916	-2.8545	potential_novel_lncRNA	NA	NA	intergenic	intergenic	u
MSTRG.14780	MSTRG.14780	0.0105186	-2.84288	potential_novel_lncRNA	NA	NA	intergenic	intergenic	u
MSTRG.9623	MSTRG.9623	0.00123317	-2.76194	potential_novel_lncRNA	NA	NA	intergenic	intergenic	u
MSTRG.20413	MSTRG.20413	0.0129207	-2.74074	potential_novel_lncRNA	NA	NA	intergenic	intergenic	u
MSTRG.30156	MSTRG.30156	0.000364036	-2.62972	potential_novel_lncRNA	NA	NA	intergenic	intergenic	u
MSTRG.26903	MSTRG.26903	0.00483973	-2.52579	potential_novel_lncRNA	NA	NA	intergenic	intergenic	u
MSTRG.29205	MSTRG.29205	1.98e-14	-2.46896	potential_novel_lncRNA	NA	NA	intergenic	intergenic	u
MSTRG.23773	MSTRG.23773	0.00628492	-2.39497	potential_novel_lncRNA	NA	NA	intergenic	intergenic	u
MSTRG.23774	MSTRG.23774	1.26e-08	-2.37902	potential_novel_lncRNA	NA	NA	intergenic	intergenic	u
MSTRG.26906	MSTRG.26906	0.000560605	-2.31004	potential_novel_lncRNA	NA	NA	intergenic	intergenic	u
MSTRG.24464	MSTRG.24464	0.00112364	-2.30243	potential_novel_lncRNA	NA	NA	intergenic	intergenic	u
MSTRG.9074	MSTRG.9074	0.0195252	-2.25226	potential_novel_lncRNA	NA	NA	intergenic	intergenic	u
MSTRG.10383	MSTRG.10383	0.0136534	-2.18666	potential_novel_lncRNA	NA	NA	intergenic	intergenic	u
MSTRG.15845	MSTRG.15845	2.55e-08	-2.14739	potential_novel_lncRNA	NA	NA	intergenic	intergenic	u
MSTRG.12085	MSTRG.12085	2.03e-05	-2.12802	potential_novel_lncRNA	NA	NA	antisense	antisense	i
MSTRG.20669	MSTRG.20669	8.57e-06	-2.03268	potential_novel_lncRNA	NA	NA	antisense	antisense	i
MSTRG.18649	MSTRG.18649	0.0395655	-2.00479	potential_novel_lncRNA	NA	NA	antisense	antisense	x
MSTRG.21472	MSTRG.21472	0.0070854	-1.98396	potential_novel_lncRNA	NA	NA	intergenic	intergenic	u
MSTRG.26902	MSTRG.26902	0.00362078	-1.97976	potential_novel_lncRNA	NA	NA	intergenic	intergenic	u
MSTRG.10379	MSTRG.10379	0.0450252	-1.97161	potential_novel_lncRNA	NA	NA	intergenic	intergenic	u
MSTRG.39340	MSTRG.39340	0.00406387	-1.96802	potential_novel_lncRNA	NA	NA	intergenic	intergenic	u
MSTRG.3175	MSTRG.3175	0.00617518	-1.9665	potential_novel_lncRNA	NA	NA	intergenic	intergenic	u
MSTRG.39499	MSTRG.39499	0.0304105	-1.95294	potential_novel_lncRNA	NA	NA	antisense	antisense	x
MSTRG.18465	MSTRG.18465	0.0161328	-1.85058	potential_novel_lncRNA	NA	NA	antisense	antisense	i
MSTRG.12684	MSTRG.12684	0.00149722	-1.84853	potential_novel_lncRNA	NA	NA	intergenic	intergenic	u
MSTRG.48144	MSTRG.48144	0.0365335	-1.82161	potential_novel_lncRNA	NA	NA	intergenic	intergenic	u
MSTRG.33700	MSTRG.33700	1.91e-08	-1.78812	potential_novel_lncRNA	NA	NA	antisense	antisense	x
MSTRG.8439	MSTRG.8439	0.0151929	-1.73334	potential_novel_lncRNA	NA	NA	antisense	antisense	o
MSTRG.22874	MSTRG.22874	0.0262411	-1.72161	potential_novel_lncRNA	NA	NA	antisense	antisense	i
MSTRG.26808	MSTRG.26808	0.0365135	-1.68472	potential_novel_lncRNA	NA	NA	intergenic	intergenic	u
MSTRG.31860	MSTRG.31860	0.00612354	-1.63417	potential_novel_lncRNA	NA	NA	antisense	antisense	i
MSTRG.13263	MSTRG.13263	0.0465806	-1.62396	potential_novel_lncRNA	NA	NA	antisense	antisense	x
MSTRG.22880	MSTRG.22880	0.0267098	-1.61673	potential_novel_lncRNA	NA	NA	antisense	antisense	x
MSTRG.31595	MSTRG.31595	2.11e-05	-1.60431	potential_novel_lncRNA	NA	NA	antisense	antisense	i
MSTRG.27110	MSTRG.27110	0.00110374	-1.57879	potential_novel_lncRNA	NA	NA	antisense	antisense,intergenic	x,u
MSTRG.20025	MSTRG.20025	0.00755239	-1.57752	potential_novel_lncRNA	NA	NA	antisense	antisense	x
MSTRG.9336	MSTRG.9336	0.000381377	-1.52202	potential_novel_lncRNA	NA	NA	intergenic	intergenic	u
MSTRG.29197	MSTRG.29197	0.00345405	-1.51223	potential_novel_lncRNA	NA	NA	intergenic	intergenic	u
MSTRG.15852	MSTRG.15852	3.04e-05	-1.50499	potential_novel_lncRNA	NA	NA	antisense	antisense	i
MSTRG.28938	MSTRG.28938	6.65e-05	-1.46399	potential_novel_lncRNA	NA	NA	antisense	antisense	i
MSTRG.11772	MSTRG.11772	0.00811742	-1.44994	potential_novel_lncRNA	NA	NA	antisense	antisense	i
MSTRG.17521	MSTRG.17521	0.0119865	-1.44077	potential_novel_lncRNA	NA	NA	intergenic	intergenic	u
MSTRG.11441	MSTRG.11441	7.91e-11	-1.40437	potential_novel_lncRNA	NA	NA	antisense	antisense	i
MSTRG.28939	MSTRG.28939	2.23e-10	-1.38048	potential_novel_lncRNA	NA	NA	antisense	antisense	i
MSTRG.50686	MSTRG.50686	0.036644	-1.27554	potential_novel_lncRNA	NA	NA	antisense	antisense	x
MSTRG.37344	MSTRG.37344	1.94e-06	-1.24675	potential_novel_lncRNA	NA	NA	antisense	antisense	i
MSTRG.15523	MSTRG.15523	0.0424987	-1.21416	potential_novel_lncRNA	NA	NA	intergenic	intergenic	u
MSTRG.11781	MSTRG.11781	0.0102838	-1.16941	potential_novel_lncRNA	NA	NA	intergenic	intergenic	u
MSTRG.48648	MSTRG.48648	0.00309067	-1.08266	potential_novel_lncRNA	NA	NA	antisense	antisense	i
MSTRG.51264	MSTRG.51264	0.0203423	-1.01012	potential_novel_lncRNA	NA	NA	intergenic	intergenic	u
MSTRG.32117	MSTRG.32117	0.018406	1.02387	potential_novel_lncRNA	NA	NA	antisense	antisense	x
MSTRG.9902	MSTRG.9902	0.0161531	1.03422	potential_novel_lncRNA	NA	NA	antisense	antisense	x
MSTRG.2533	MSTRG.2533	0.000176998	1.06407	potential_novel_lncRNA	NA	NA	intergenic	intergenic	u
MSTRG.40422	MSTRG.40422	0.000641748	1.10875	potential_novel_lncRNA	NA	NA	intergenic	intergenic	u
MSTRG.22937	MSTRG.22937	0.019581	1.16495	potential_novel_lncRNA	NA	NA	intergenic	intergenic	u
MSTRG.52939	MSTRG.52939	0.00133797	1.16508	potential_novel_lncRNA	NA	NA	antisense	antisense	i
MSTRG.5853	MSTRG.5853	0.00382681	1.18205	potential_novel_lncRNA	NA	NA	intergenic	intergenic	u
MSTRG.17561	MSTRG.17561	0.00898027	1.19795	potential_novel_lncRNA	NA	NA	intergenic	intergenic	u
MSTRG.13591	MSTRG.13591	0.000888878	1.22833	potential_novel_lncRNA	NA	NA	antisense	antisense	x
MSTRG.36959	MSTRG.36959	0.00252851	1.23885	potential_novel_lncRNA	NA	NA	antisense	antisense	x
MSTRG.5908	MSTRG.5908	0.00749459	1.29372	potential_novel_lncRNA	NA	NA	intergenic	intergenic	u
MSTRG.30452	MSTRG.30452	0.0181705	1.29825	potential_novel_lncRNA	NA	NA	intergenic	intergenic	u
MSTRG.32945	MSTRG.32945	0.00827091	1.34126	potential_novel_lncRNA	NA	NA	antisense	antisense	x
MSTRG.11031	MSTRG.11031	2.2e-10	1.36441	potential_novel_lncRNA	NA	NA	intergenic	intergenic	u
MSTRG.28545	MSTRG.28545	0.0200434	1.36665	potential_novel_lncRNA	NA	NA	intergenic	intergenic	u
MSTRG.26499	MSTRG.26499	0.0169741	1.37793	potential_novel_lncRNA	NA	NA	antisense	antisense	x
MSTRG.5880	MSTRG.5880	0.0486451	1.4281	potential_novel_lncRNA	NA	NA	antisense	antisense	x
MSTRG.21595	MSTRG.21595	0.00741496	1.4422	potential_novel_lncRNA	NA	NA	antisense	antisense	i
MSTRG.41406	MSTRG.41406	0.00790587	1.44902	potential_novel_lncRNA	NA	NA	antisense	antisense	x
MSTRG.51329	MSTRG.51329	0.0475674	1.45557	potential_novel_lncRNA	NA	NA	antisense	antisense	i
MSTRG.18382	MSTRG.18382	0.0304581	1.46391	potential_novel_lncRNA	NA	NA	intergenic	intergenic	u
MSTRG.37806	MSTRG.37806	0.00758104	1.46957	potential_novel_lncRNA	NA	NA	intergenic	intergenic	u
MSTRG.18602	MSTRG.18602	0.00643963	1.47762	potential_novel_lncRNA	NA	NA	antisense	antisense,intergenic	x,u
MSTRG.33156	MSTRG.33156	0.00907005	1.49142	potential_novel_lncRNA	NA	NA	intergenic	intergenic	u
MSTRG.22551	MSTRG.22551	0.00116193	1.50689	potential_novel_lncRNA	NA	NA	antisense	antisense	i
MSTRG.22605	MSTRG.22605	0.00681938	1.54189	potential_novel_lncRNA	NA	NA	antisense	antisense	x
MSTRG.12945	MSTRG.12945	0.00043166	1.54488	potential_novel_lncRNA	NA	NA	antisense	antisense	x
MSTRG.12498	MSTRG.12498	0.013447	1.60213	potential_novel_lncRNA	NA	NA	intergenic	intergenic	u
MSTRG.5809	MSTRG.5809	0.00162105	1.60376	potential_novel_lncRNA	NA	NA	intergenic	intergenic	u
MSTRG.42630	MSTRG.42630	0.015307	1.61916	potential_novel_lncRNA	NA	NA	antisense	antisense	x
MSTRG.21743	MSTRG.21743	0.0444498	1.64313	potential_novel_lncRNA	NA	NA	antisense	antisense	x
MSTRG.50166	MSTRG.50166	0.01519	1.65344	potential_novel_lncRNA	NA	NA	intergenic	intergenic	u
MSTRG.21052	MSTRG.21052	0.0407527	1.68922	potential_novel_lncRNA	NA	NA	intergenic	intergenic	u
MSTRG.37767	MSTRG.37767	0.0210781	1.69788	potential_novel_lncRNA	NA	NA	intergenic	intergenic	u
MSTRG.27986	MSTRG.27986	0.0239353	1.70608	potential_novel_lncRNA	NA	NA	antisense	antisense	i,x
MSTRG.35161	MSTRG.35161	0.0148742	1.70954	potential_novel_lncRNA	NA	NA	intergenic	intergenic	u
MSTRG.44122	MSTRG.44122	0.00133444	1.71015	potential_novel_lncRNA	NA	NA	antisense	antisense	x
MSTRG.29683	MSTRG.29683	9.99e-05	1.71363	potential_novel_lncRNA	NA	NA	antisense	antisense	i
MSTRG.48166	MSTRG.48166	5.23e-07	1.79672	potential_novel_lncRNA	NA	NA	antisense	antisense	i
MSTRG.14934	MSTRG.14934	0.00119648	1.79926	potential_novel_lncRNA	NA	NA	antisense	antisense	x
MSTRG.20154	MSTRG.20154	0.000751628	1.8148	potential_novel_lncRNA	NA	NA	intergenic	intergenic	u
MSTRG.49753	MSTRG.49753	0.000469684	1.82066	potential_novel_lncRNA	NA	NA	intergenic	intergenic	u
MSTRG.27116	MSTRG.27116	0.0259393	1.82926	potential_novel_lncRNA	NA	NA	intergenic	intergenic	u
MSTRG.48567	MSTRG.48567	0.0157355	1.86544	potential_novel_lncRNA	NA	NA	antisense	antisense	i
MSTRG.15335	MSTRG.15335	0.00676459	1.8942	potential_novel_lncRNA	NA	NA	intergenic	intergenic	u
MSTRG.30495	MSTRG.30495	0.00277775	1.90409	potential_novel_lncRNA	NA	NA	intergenic	intergenic	u
MSTRG.31878	MSTRG.31878	0.00418456	1.91934	potential_novel_lncRNA	NA	NA	antisense	antisense	x
MSTRG.14873	MSTRG.14873	0.0281539	1.9369	potential_novel_lncRNA	NA	NA	intergenic	intergenic	u
MSTRG.8144	MSTRG.8144	1.31e-07	1.9482	potential_novel_lncRNA	NA	NA	antisense	antisense	x
MSTRG.45132	MSTRG.45132	1.3e-07	1.96237	potential_novel_lncRNA	NA	NA	intergenic	intergenic	u
MSTRG.20012	MSTRG.20012	0.0337638	1.99683	potential_novel_lncRNA	NA	NA	antisense	antisense	i
MSTRG.16511	MSTRG.16511	0.0321493	2.02494	potential_novel_lncRNA	NA	NA	intergenic	intergenic	u
MSTRG.22286	MSTRG.22286	0.0205754	2.04182	potential_novel_lncRNA	NA	NA	intergenic	intergenic	u
MSTRG.10333	MSTRG.10333	1.35e-05	2.04947	potential_novel_lncRNA	NA	NA	antisense	antisense	i
MSTRG.19455	MSTRG.19455	0.0222015	2.05384	potential_novel_lncRNA	NA	NA	antisense	antisense	x
MSTRG.51770	MSTRG.51770	0.0225342	2.07021	potential_novel_lncRNA	NA	NA	intergenic	intergenic	u
MSTRG.47307	MSTRG.47307	2.95e-05	2.08257	potential_novel_lncRNA	NA	NA	intergenic	intergenic	u
MSTRG.9547	MSTRG.9547	0.00279864	2.10395	potential_novel_lncRNA	NA	NA	intergenic	intergenic	u
MSTRG.21593	MSTRG.21593	0.0431035	2.10953	potential_novel_lncRNA	NA	NA	antisense	antisense	i
MSTRG.14716	MSTRG.14716	0.00594004	2.18933	potential_novel_lncRNA	NA	NA	antisense	antisense	i
MSTRG.20940	MSTRG.20940	0.0169702	2.19575	potential_novel_lncRNA	NA	NA	intergenic	intergenic	u
MSTRG.29423	MSTRG.29423	0.0477311	2.20436	potential_novel_lncRNA	NA	NA	antisense	antisense	x
MSTRG.5806	MSTRG.5806	9.43e-09	2.23535	potential_novel_lncRNA	NA	NA	intergenic	intergenic	u
MSTRG.16298	MSTRG.16298	0.00776016	2.24693	potential_novel_lncRNA	NA	NA	antisense	antisense	x
MSTRG.28125	MSTRG.28125	0.019787	2.24792	potential_novel_lncRNA	NA	NA	intergenic	intergenic	u
MSTRG.20934	MSTRG.20934	0.0138253	2.25465	potential_novel_lncRNA	NA	NA	intergenic	intergenic	u
MSTRG.12969	MSTRG.12969	0.0323653	2.26275	potential_novel_lncRNA	NA	NA	intergenic	intergenic	u
MSTRG.51751	MSTRG.51751	7.62e-11	2.30485	potential_novel_lncRNA	NA	NA	intergenic	intergenic	u
MSTRG.22627	MSTRG.22627	4.58e-09	2.32213	potential_novel_lncRNA	NA	NA	intergenic	intergenic	u
MSTRG.23679	MSTRG.23679	0.00271708	2.40333	potential_novel_lncRNA	NA	NA	antisense	antisense	i
MSTRG.8858	MSTRG.8858	0.00588287	2.40593	potential_novel_lncRNA	NA	NA	intergenic	intergenic	u
MSTRG.22803	MSTRG.22803	0.010679	2.46123	potential_novel_lncRNA	NA	NA	antisense	antisense	i
MSTRG.39423	MSTRG.39423	0.000891313	2.4847	potential_novel_lncRNA	NA	NA	antisense	antisense	x
MSTRG.17171	MSTRG.17171	0.00772361	2.50075	potential_novel_lncRNA	NA	NA	antisense	antisense	i
MSTRG.13538	MSTRG.13538	0.0337245	2.51019	potential_novel_lncRNA	NA	NA	intergenic	intergenic	u
MSTRG.36918	MSTRG.36918	0.00119236	2.53987	potential_novel_lncRNA	NA	NA	intergenic	intergenic	u
MSTRG.18417	MSTRG.18417	0.0177385	2.59951	potential_novel_lncRNA	NA	NA	intergenic	intergenic	u
MSTRG.45456	MSTRG.45456	0.000349239	2.68505	potential_novel_lncRNA	NA	NA	intergenic	intergenic	u
MSTRG.31348	MSTRG.31348	0.000672561	2.70612	potential_novel_lncRNA	NA	NA	antisense	antisense	x
MSTRG.9047	MSTRG.9047	0.000193595	2.76436	potential_novel_lncRNA	NA	NA	antisense	antisense	i
MSTRG.12999	MSTRG.12999	5.91e-05	2.78052	potential_novel_lncRNA	NA	NA	intergenic	intergenic	u
MSTRG.47304	MSTRG.47304	7.02e-08	2.78775	potential_novel_lncRNA	NA	NA	intergenic	intergenic	u
MSTRG.49787	MSTRG.49787	0.000204941	2.80147	potential_novel_lncRNA	NA	NA	intergenic	intergenic	u
MSTRG.48662	MSTRG.48662	2.27e-24	2.83874	potential_novel_lncRNA	NA	NA	antisense	antisense	i
MSTRG.45134	MSTRG.45134	0.0121437	2.88771	potential_novel_lncRNA	NA	NA	intergenic	intergenic	u
MSTRG.6323	MSTRG.6323	0.000267469	2.90988	potential_novel_lncRNA	NA	NA	intergenic	intergenic	u
MSTRG.25183	MSTRG.25183	0.00421693	2.91061	potential_novel_lncRNA	NA	NA	intergenic	intergenic	u
MSTRG.26907	MSTRG.26907	2.78e-09	2.93468	potential_novel_lncRNA	NA	NA	intergenic	intergenic	u
MSTRG.12228	MSTRG.12228	0.000128155	2.93931	potential_novel_lncRNA	NA	NA	intergenic	intergenic	u
MSTRG.13249	MSTRG.13249	0.000578124	2.97264	potential_novel_lncRNA	NA	NA	antisense	antisense	i
MSTRG.38441	MSTRG.38441	1.71e-28	3.08378	potential_novel_lncRNA	NA	NA	antisense	antisense	x
MSTRG.50044	MSTRG.50044	1.17e-05	3.09925	potential_novel_lncRNA	NA	NA	intergenic	intergenic	u
MSTRG.17543	MSTRG.17543	1.56e-07	3.13113	potential_novel_lncRNA	NA	NA	intergenic	intergenic	u
MSTRG.12425	MSTRG.12425	1.28e-07	3.14152	potential_novel_lncRNA	NA	NA	intergenic	intergenic	u
MSTRG.17632	MSTRG.17632	0.00488078	3.20175	potential_novel_lncRNA	NA	NA	intergenic	intergenic	u
MSTRG.50409	MSTRG.50409	1.58e-09	3.32314	potential_novel_lncRNA	NA	NA	intergenic	intergenic	u
MSTRG.49010	MSTRG.49010	0.0153781	3.33636	potential_novel_lncRNA	NA	NA	intergenic	intergenic	u
MSTRG.4255	MSTRG.4255	2.1e-07	3.38282	potential_novel_lncRNA	NA	NA	intergenic	intergenic	u
MSTRG.50410	MSTRG.50410	0.00131957	3.43028	potential_novel_lncRNA	NA	NA	intergenic	intergenic	u
MSTRG.8641	MSTRG.8641	0.00116429	3.72596	potential_novel_lncRNA	NA	NA	antisense	antisense	x
MSTRG.14931	MSTRG.14931	3.18e-07	3.73932	potential_novel_lncRNA	NA	NA	intergenic	intergenic	u
MSTRG.17541	MSTRG.17541	0.000281572	3.81293	potential_novel_lncRNA	NA	NA	intergenic	intergenic	u
MSTRG.51925	MSTRG.51925	4.09e-07	3.88887	potential_novel_lncRNA	NA	NA	antisense	antisense	x
MSTRG.21586	MSTRG.21586	3.04e-05	4.11877	potential_novel_lncRNA	NA	NA	intergenic	intergenic	u
MSTRG.21451	MSTRG.21451	0.000523482	4.15496	potential_novel_lncRNA	NA	NA	intergenic	intergenic	u
MSTRG.50408	MSTRG.50408	1.29e-09	4.36809	potential_novel_lncRNA	NA	NA	intergenic	intergenic	u
MSTRG.1472	MSTRG.1472	2.77e-10	4.41428	potential_novel_lncRNA	NA	NA	antisense	antisense	x
MSTRG.16114	MSTRG.16114	4.33e-14	4.63011	potential_novel_lncRNA	NA	NA	antisense	antisense	x
MSTRG.50096	MSTRG.50096	1.05e-11	4.75303	potential_novel_lncRNA	NA	NA	intergenic	intergenic	u
ENSMUSG00000022026	Olfm4	3.04e-09	-6.6674	protein_coding	protein_coding	protein_coding	NA	NA	NA
ENSMUSG00000073764	Gm12888	6.15e-05	-6.22035	protein_coding	protein_coding	protein_coding	NA	NA	NA
ENSMUSG00000034164	Emid1	8.21e-07	-5.14377	protein_coding	protein_coding	protein_coding,retained_intron,nonsense_mediated_decay,processed_transcript	NA	NA	NA
ENSMUSG00000031257	Nox1	2.65e-07	-4.87533	protein_coding	protein_coding	protein_coding	NA	NA	NA
ENSMUSG00000067818	Myl9	0.000695377	-4.60235	protein_coding	protein_coding	protein_coding,processed_transcript	NA	NA	NA
ENSMUSG00000030048	Gkn3	5.69e-08	-4.41559	protein_coding	protein_coding	protein_coding	NA	NA	NA
ENSMUSG00000041293	Adgrf1	4.89e-05	-3.99328	protein_coding	protein_coding	protein_coding	NA	NA	NA
ENSMUSG00000020140	Lgr5	4.05e-11	-3.99132	protein_coding	protein_coding	protein_coding,retained_intron,processed_transcript	NA	NA	NA
ENSMUSG00000099009	Gm28046	0.0412682	-3.95026	protein_coding	protein_coding	protein_coding	NA	NA	NA
ENSMUSG00000032292	Nr2e3	4.64e-09	-3.92862	protein_coding	protein_coding	protein_coding,retained_intron,processed_transcript	NA	NA	NA
ENSMUSG00000023336	Wfdc1	0.0178516	-3.78453	protein_coding	protein_coding	protein_coding	NA	NA	NA
ENSMUSG00000036422	Pcdh8	0.0101326	-3.78097	protein_coding	protein_coding	protein_coding,retained_intron,processed_transcript	NA	NA	NA
ENSMUSG00000000416	Cttnbp2	5.06e-09	-3.67243	protein_coding	protein_coding	retained_intron,protein_coding,nonsense_mediated_decay	NA	NA	NA
ENSMUSG00000026322	Htr4	6.01e-05	-3.57843	protein_coding	protein_coding	protein_coding	NA	NA	NA
ENSMUSG00000042155	Klhl23	1.69e-10	-3.56297	protein_coding	protein_coding	processed_transcript,protein_coding	NA	NA	NA
ENSMUSG00000026430	Rassf5	2.08e-32	-3.5336	protein_coding	protein_coding	protein_coding,processed_transcript	NA	NA	NA
ENSMUSG00000028602	Tnfrsf8	3.74e-18	-3.40165	protein_coding	protein_coding	protein_coding,nonsense_mediated_decay	NA	NA	NA
ENSMUSG00000079710	Gm3448	0.0412936	-3.33074	protein_coding	protein_coding	protein_coding	NA	NA	NA
ENSMUSG00000022018	Rgcc	8.64e-34	-3.26062	protein_coding	protein_coding	protein_coding	NA	NA	NA
ENSMUSG00000101904	Gm29427	0.0356551	-3.23422	protein_coding	protein_coding	nonsense_mediated_decay	NA	NA	NA
ENSMUSG00000060548	Tnfrsf19	4.49e-09	-3.23371	protein_coding	protein_coding	protein_coding	NA	NA	NA
ENSMUSG00000028874	Fgr	1.06e-08	-3.16656	protein_coding	protein_coding	processed_transcript,protein_coding	NA	NA	NA
ENSMUSG00000044337	Ackr3	3.19e-05	-3.16581	protein_coding	protein_coding	protein_coding	NA	NA	NA
ENSMUSG00000026786	Apbb1ip	1.16e-05	-3.11228	protein_coding	protein_coding	protein_coding,processed_transcript,retained_intron	NA	NA	NA
ENSMUSG00000064165	Krt39	5.82e-05	-3.10979	protein_coding	protein_coding	protein_coding	NA	NA	NA
ENSMUSG00000068270	Shroom4	5.88e-15	-3.085	protein_coding	protein_coding	protein_coding	NA	NA	NA
ENSMUSG00000011148	Adssl1	8.58e-06	-3.08127	protein_coding	protein_coding	protein_coding	NA	NA	NA
ENSMUSG00000048001	Hes5	0.00340678	-3.02785	protein_coding	protein_coding	protein_coding,processed_transcript	NA	NA	NA
ENSMUSG00000004540	Psg17	0.000126952	-3.01866	protein_coding	protein_coding	protein_coding	NA	NA	NA
ENSMUSG00000079654	Prrt4	0.000504171	-2.98238	protein_coding	protein_coding	protein_coding	NA	NA	NA
ENSMUSG00000047517	Dmbt1	6.92e-06	-2.98205	protein_coding	protein_coding	protein_coding,processed_transcript	NA	NA	NA
ENSMUSG00000029335	Bmp3	7.12e-34	-2.94986	protein_coding	protein_coding	protein_coding	NA	NA	NA
ENSMUSG00000036526	Card11	2e-08	-2.94889	protein_coding	protein_coding	protein_coding,retained_intron	NA	NA	NA
ENSMUSG00000024411	Aqp4	1.85e-17	-2.88129	protein_coding	protein_coding	protein_coding	NA	NA	NA
ENSMUSG00000059493	Nhs	1.73e-18	-2.83065	protein_coding	protein_coding	protein_coding	NA	NA	NA
ENSMUSG00000044313	Mab21l3	0.000565091	-2.82519	protein_coding	protein_coding	protein_coding	NA	NA	NA
ENSMUSG00000045667	Smtnl2	0.00122294	-2.81485	protein_coding	protein_coding	protein_coding,processed_transcript	NA	NA	NA
ENSMUSG00000039304	Tnfsf10	1.69e-07	-2.81134	protein_coding	protein_coding	protein_coding	NA	NA	NA
ENSMUSG00000070532	Ccdc190	5.94e-06	-2.8074	protein_coding	protein_coding	protein_coding	NA	NA	NA
ENSMUSG00000035615	Frmpd1	0.00139182	-2.7992	protein_coding	protein_coding	protein_coding	NA	NA	NA
ENSMUSG00000037846	Rtkn2	0.000244412	-2.77246	protein_coding	protein_coding	protein_coding,nonsense_mediated_decay,processed_transcript	NA	NA	NA
ENSMUSG00000040694	Apobec2	1.24e-05	-2.76439	protein_coding	protein_coding	protein_coding	NA	NA	NA
ENSMUSG00000046480	Scn4b	0.00135158	-2.74857	protein_coding	protein_coding	protein_coding	NA	NA	NA
ENSMUSG00000021373	Cap2	2.69e-07	-2.72621	protein_coding	protein_coding	protein_coding,processed_transcript	NA	NA	NA
ENSMUSG00000070304	Scn2b	7.73e-10	-2.71598	protein_coding	protein_coding	protein_coding	NA	NA	NA
ENSMUSG00000059213	Ddn	8.47e-05	-2.7157	protein_coding	protein_coding	protein_coding	NA	NA	NA
ENSMUSG00000035226	Rims4	0.000594938	-2.66752	protein_coding	protein_coding	protein_coding	NA	NA	NA
ENSMUSG00000032373	Car12	3.34e-14	-2.66463	protein_coding	protein_coding	protein_coding,retained_intron	NA	NA	NA
ENSMUSG00000017493	Igfbp4	1.25e-06	-2.64041	protein_coding	protein_coding	protein_coding,processed_transcript	NA	NA	NA
ENSMUSG00000009248	Ascl2	0.00105121	-2.62665	protein_coding	protein_coding	protein_coding	NA	NA	NA
ENSMUSG00000039814	Xkr5	2.08e-15	-2.62633	protein_coding	protein_coding	protein_coding,processed_transcript,nonsense_mediated_decay	NA	NA	NA
ENSMUSG00000059336	Slc14a1	0.00153274	-2.62492	protein_coding	protein_coding	protein_coding	NA	NA	NA
ENSMUSG00000078202	Nrarp	4e-07	-2.60518	protein_coding	protein_coding	protein_coding	NA	NA	NA
ENSMUSG00000056978	Hamp2	0.00049699	-2.58492	protein_coding	protein_coding	protein_coding	NA	NA	NA
ENSMUSG00000096001	2610528A11Rik	0.0494754	-2.58454	protein_coding	protein_coding	processed_transcript,protein_coding	NA	NA	NA
ENSMUSG00000053216	Btn2a2	0.0132414	-2.57637	protein_coding	protein_coding	protein_coding	NA	NA	NA
ENSMUSG00000055210	Foxd2	0.0205078	-2.5533	protein_coding	protein_coding	protein_coding	NA	NA	NA
ENSMUSG00000029123	Stk32b	0.00126464	-2.54965	protein_coding	protein_coding	protein_coding	NA	NA	NA
ENSMUSG00000014813	Stc1	0.00026052	-2.52678	protein_coding	protein_coding	protein_coding	NA	NA	NA
ENSMUSG00000047963	Stbd1	0.0109099	-2.50878	protein_coding	protein_coding	protein_coding,nonsense_mediated_decay	NA	NA	NA
ENSMUSG00000050511	Oprd1	0.00324915	-2.48118	protein_coding	protein_coding	protein_coding	NA	NA	NA
ENSMUSG00000055612	Cdca7	1.43e-10	-2.47747	protein_coding	protein_coding	protein_coding,processed_transcript	NA	NA	NA
ENSMUSG00000089789	Rdh1	1.76e-07	-2.47607	protein_coding	protein_coding	protein_coding	NA	NA	NA
ENSMUSG00000067724	Gbx1	0.00212824	-2.46241	protein_coding	protein_coding	protein_coding	NA	NA	NA
ENSMUSG00000049409	Prokr1	1.52e-09	-2.45536	protein_coding	protein_coding	protein_coding	NA	NA	NA
ENSMUSG00000025492	Ifitm3	2.67e-08	-2.4548	protein_coding	protein_coding	protein_coding	NA	NA	NA
ENSMUSG00000055172	C1ra	2.97e-07	-2.44124	protein_coding	protein_coding	protein_coding	NA	NA	NA
ENSMUSG00000027793	Ccna1	2.19e-05	-2.44102	protein_coding	protein_coding	protein_coding	NA	NA	NA
ENSMUSG00000044921	Rassf9	0.00174508	-2.41666	protein_coding	protein_coding	protein_coding	NA	NA	NA
ENSMUSG00000048776	Pthlh	6.1e-07	-2.41389	protein_coding	protein_coding	protein_coding	NA	NA	NA
ENSMUSG00000074652	Myh7b	0.00558947	-2.41367	protein_coding	protein_coding	protein_coding,processed_transcript,retained_intron	NA	NA	NA
ENSMUSG00000032232	Cgnl1	2.21e-27	-2.40601	protein_coding	protein_coding	protein_coding,retained_intron,processed_transcript	NA	NA	NA
ENSMUSG00000075330	A930003A15Rik	0.0122203	-2.38932	protein_coding	protein_coding	protein_coding	NA	NA	NA
ENSMUSG00000042429	Adora1	1.27e-08	-2.3809	protein_coding	protein_coding	protein_coding	NA	NA	NA
ENSMUSG00000022993	4930415O20Rik	0.00329594	-2.37662	protein_coding	protein_coding	protein_coding	NA	NA	NA
ENSMUSG00000026676	Ccdc3	0.00233201	-2.35977	protein_coding	protein_coding	protein_coding	NA	NA	NA
ENSMUSG00000030790	Adm	0.00558383	-2.35907	protein_coding	protein_coding	protein_coding,retained_intron	NA	NA	NA
ENSMUSG00000026873	Phf19	7.73e-14	-2.32046	protein_coding	protein_coding	protein_coding,processed_transcript,retained_intron	NA	NA	NA
ENSMUSG00000025608	Podxl	7.57e-05	-2.30243	protein_coding	protein_coding	protein_coding,processed_transcript	NA	NA	NA
ENSMUSG00000074651	Mcidas	0.0489047	-2.29498	protein_coding	protein_coding	protein_coding	NA	NA	NA
ENSMUSG00000066607	6030419C18Rik	0.00139547	-2.28794	protein_coding	protein_coding	protein_coding,retained_intron	NA	NA	NA
ENSMUSG00000026401	Cd55b	3.91e-06	-2.26837	protein_coding	protein_coding	protein_coding,processed_transcript	NA	NA	NA
ENSMUSG00000026959	Grin1	0.0291979	-2.25576	protein_coding	protein_coding	protein_coding,processed_transcript	NA	NA	NA
ENSMUSG00000067750	Khdc1a	0.0115735	-2.2543	protein_coding	protein_coding	protein_coding	NA	NA	NA
ENSMUSG00000038079	Tmem237	0.00147944	-2.25406	protein_coding	protein_coding	protein_coding,retained_intron	NA	NA	NA
ENSMUSG00000028539	Artn	0.00852163	-2.24152	protein_coding	protein_coding	protein_coding,processed_transcript	NA	NA	NA
ENSMUSG00000078502	Gm13212	3.26e-16	-2.21869	protein_coding	protein_coding	protein_coding	NA	NA	NA
ENSMUSG00000030785	Cox6a2	0.00165438	-2.21515	protein_coding	protein_coding	protein_coding	NA	NA	NA
ENSMUSG00000031465	Angpt2	4.78e-09	-2.20688	protein_coding	protein_coding	protein_coding,processed_transcript	NA	NA	NA
ENSMUSG00000028763	Hspg2	7.83e-14	-2.13554	protein_coding	protein_coding	protein_coding,processed_transcript	NA	NA	NA
ENSMUSG00000060961	Slc4a4	3.64e-11	-2.13395	protein_coding	protein_coding	protein_coding,processed_transcript	NA	NA	NA
ENSMUSG00000009378	Slc16a12	3.34e-13	-2.1199	protein_coding	protein_coding	protein_coding	NA	NA	NA
ENSMUSG00000040231	Syngr4	0.00622049	-2.11987	protein_coding	protein_coding	processed_transcript,protein_coding	NA	NA	NA
ENSMUSG00000031558	Slit2	1.25e-08	-2.10935	protein_coding	protein_coding	protein_coding,nonsense_mediated_decay,retained_intron,processed_transcript	NA	NA	NA
ENSMUSG00000037474	Dtl	1.17e-09	-2.10725	protein_coding	protein_coding	nonsense_mediated_decay,protein_coding,processed_transcript,retained_intron	NA	NA	NA
ENSMUSG00000025991	Cps1	3.41e-12	-2.10526	protein_coding	protein_coding	protein_coding	NA	NA	NA
ENSMUSG00000042942	Greb1l	0.000140028	-2.10515	protein_coding	protein_coding	retained_intron,protein_coding,nonsense_mediated_decay,processed_transcript	NA	NA	NA
ENSMUSG00000046160	Olig1	0.0363255	-2.09828	protein_coding	protein_coding	protein_coding	NA	NA	NA
ENSMUSG00000068744	Psrc1	1.53e-05	-2.09799	protein_coding	protein_coding	protein_coding,processed_transcript,retained_intron	NA	NA	NA
ENSMUSG00000022528	Hes1	1.56e-06	-2.09646	protein_coding	protein_coding	processed_transcript,protein_coding,retained_intron	NA	NA	NA
ENSMUSG00000020044	Timp3	2.33e-09	-2.09401	protein_coding	protein_coding	protein_coding,processed_transcript	NA	NA	NA
ENSMUSG00000047702	Olfr1388	3.04e-06	-2.09375	protein_coding	protein_coding	protein_coding	NA	NA	NA
ENSMUSG00000044320	1700001O22Rik	0.000248229	-2.07543	protein_coding	protein_coding	processed_transcript,protein_coding	NA	NA	NA
ENSMUSG00000025001	Hells	7.47e-13	-2.07474	protein_coding	protein_coding	protein_coding,retained_intron,processed_transcript	NA	NA	NA
ENSMUSG00000000037	Scml2	0.00190599	-2.07346	protein_coding	protein_coding	protein_coding,processed_transcript	NA	NA	NA
ENSMUSG00000028039	Efna3	0.00392146	-2.07217	protein_coding	protein_coding	protein_coding,processed_transcript	NA	NA	NA
ENSMUSG00000054342	Kcnn4	1.07e-05	-2.06356	protein_coding	protein_coding	protein_coding,retained_intron	NA	NA	NA
ENSMUSG00000048534	Amica1	5.45e-08	-2.06055	protein_coding	protein_coding	protein_coding,processed_transcript,retained_intron	NA	NA	NA
ENSMUSG00000024935	Slc1a1	5.3e-06	-2.05242	protein_coding	protein_coding	retained_intron,protein_coding	NA	NA	NA
ENSMUSG00000029716	Tfr2	0.0149433	-2.05203	protein_coding	protein_coding	protein_coding,retained_intron	NA	NA	NA
ENSMUSG00000068877	Selenbp2	0.0154571	-2.04979	protein_coding	protein_coding	protein_coding,retained_intron,nonsense_mediated_decay,processed_transcript	NA	NA	NA
ENSMUSG00000029436	Mmp17	1.92e-05	-2.03438	protein_coding	protein_coding	protein_coding,retained_intron	NA	NA	NA
ENSMUSG00000056758	Hmga2	1.18e-11	-2.03393	protein_coding	protein_coding	protein_coding,retained_intron	NA	NA	NA
ENSMUSG00000021175	Cdca7l	8.2e-11	-2.03178	protein_coding	protein_coding	processed_transcript,protein_coding	NA	NA	NA
ENSMUSG00000041301	Cftr	2.61e-34	-2.03045	protein_coding	protein_coding	protein_coding,nonsense_mediated_decay,retained_intron	NA	NA	NA
ENSMUSG00000031562	Dctd	1.62e-10	-2.02976	protein_coding	protein_coding	protein_coding,nonsense_mediated_decay,retained_intron,processed_transcript	NA	NA	NA
ENSMUSG00000090486	BC035947	2.31e-05	-2.0274	protein_coding	protein_coding	protein_coding,processed_transcript	NA	NA	NA
ENSMUSG00000035459	Stab2	0.0044194	-2.02308	protein_coding	protein_coding	protein_coding	NA	NA	NA
ENSMUSG00000048779	P2ry6	5.49e-06	-2.02145	protein_coding	protein_coding	protein_coding,processed_transcript,retained_intron	NA	NA	NA
ENSMUSG00000029862	Clcn1	0.00231532	-2.0196	protein_coding	protein_coding	protein_coding,nonsense_mediated_decay,processed_transcript,retained_intron	NA	NA	NA
ENSMUSG00000094928	1700122O11Rik	0.0242294	-2.01927	protein_coding	protein_coding	protein_coding	NA	NA	NA
ENSMUSG00000059060	Rad51b	7.71e-08	-2.01431	protein_coding	protein_coding	protein_coding	NA	NA	NA
ENSMUSG00000031453	Rasa3	3.62e-12	-2.01335	protein_coding	protein_coding	protein_coding,retained_intron,nonsense_mediated_decay	NA	NA	NA
ENSMUSG00000048373	Fgfbp1	3.88e-08	-2.01092	protein_coding	protein_coding	protein_coding	NA	NA	NA
ENSMUSG00000014164	Klhl3	1.04e-05	-2.00717	protein_coding	protein_coding	protein_coding	NA	NA	NA
ENSMUSG00000032278	Paqr5	0.00585323	-2.00701	protein_coding	protein_coding	processed_transcript,protein_coding	NA	NA	NA
ENSMUSG00000009633	G0s2	6.66e-06	-2.00534	protein_coding	protein_coding	protein_coding	NA	NA	NA
ENSMUSG00000041577	Prelp	5.99e-06	-2.00255	protein_coding	protein_coding	protein_coding,processed_transcript	NA	NA	NA
ENSMUSG00000051067	Lingo3	0.0300467	-1.99163	protein_coding	protein_coding	protein_coding	NA	NA	NA
ENSMUSG00000044966	Fbxo48	4.13e-05	-1.98918	protein_coding	protein_coding	protein_coding	NA	NA	NA
ENSMUSG00000004654	Ghrhr	0.00599546	-1.98277	protein_coding	protein_coding	retained_intron,protein_coding	NA	NA	NA
ENSMUSG00000017724	Etv4	7.98e-09	-1.97602	protein_coding	protein_coding	protein_coding,processed_transcript	NA	NA	NA
ENSMUSG00000079550	Mpp4	0.0070678	-1.96731	protein_coding	protein_coding	protein_coding,processed_transcript,retained_intron	NA	NA	NA
ENSMUSG00000059791	Nrm	6.8e-07	-1.96728	protein_coding	protein_coding	protein_coding	NA	NA	NA
ENSMUSG00000062175	Tgif2	1.78e-05	-1.96598	protein_coding	protein_coding	protein_coding,nonsense_mediated_decay,processed_transcript	NA	NA	NA
ENSMUSG00000033022	Cdo1	2.44e-05	-1.96462	protein_coding	protein_coding	protein_coding	NA	NA	NA
ENSMUSG00000032092	Mpzl2	4.82e-25	-1.95809	protein_coding	protein_coding	protein_coding,processed_transcript,retained_intron	NA	NA	NA
ENSMUSG00000042686	Jph1	0.000437502	-1.9407	protein_coding	protein_coding	nonsense_mediated_decay,protein_coding	NA	NA	NA
ENSMUSG00000023886	Smoc2	8.29e-13	-1.93416	protein_coding	protein_coding	protein_coding	NA	NA	NA
ENSMUSG00000040433	Zbtb38	4.59e-18	-1.93239	protein_coding	protein_coding	protein_coding,non_stop_decay,processed_transcript,retained_intron	NA	NA	NA
ENSMUSG00000041859	Mcm3	9.63e-07	-1.91827	protein_coding	protein_coding	protein_coding,retained_intron	NA	NA	NA
ENSMUSG00000054146	Krt15	0.00441114	-1.90272	protein_coding	protein_coding	protein_coding,retained_intron	NA	NA	NA
ENSMUSG00000010362	Rdm1	1.41e-05	-1.89786	protein_coding	protein_coding	processed_transcript,protein_coding,nonsense_mediated_decay,retained_intron	NA	NA	NA
ENSMUSG00000031596	Slc7a2	2.22e-09	-1.89642	protein_coding	protein_coding	protein_coding	NA	NA	NA
ENSMUSG00000001228	Uhrf1	6.66e-10	-1.89238	protein_coding	protein_coding	protein_coding,retained_intron	NA	NA	NA
ENSMUSG00000053783	1700016K19Rik	0.00227905	-1.89222	protein_coding	protein_coding	protein_coding	NA	NA	NA
ENSMUSG00000046295	Ankle1	7.79e-06	-1.88496	protein_coding	protein_coding	protein_coding,retained_intron	NA	NA	NA
ENSMUSG00000028332	Hemgn	0.000509591	-1.88476	protein_coding	protein_coding	protein_coding	NA	NA	NA
ENSMUSG00000038527	C1rl	0.0073843	-1.88337	protein_coding	protein_coding	protein_coding	NA	NA	NA
ENSMUSG00000044017	Adgrd1	0.00689269	-1.87997	protein_coding	protein_coding	protein_coding,retained_intron	NA	NA	NA
ENSMUSG00000002489	Tiam1	0.000510815	-1.87768	protein_coding	protein_coding	protein_coding,retained_intron,processed_transcript	NA	NA	NA
ENSMUSG00000028463	Car9	0.00877488	-1.87757	protein_coding	protein_coding	protein_coding,processed_transcript	NA	NA	NA
ENSMUSG00000024597	Slc12a2	4.04e-08	-1.87618	protein_coding	protein_coding	protein_coding	NA	NA	NA
ENSMUSG00000009545	Kcnq1	1.51e-10	-1.86863	protein_coding	protein_coding	protein_coding	NA	NA	NA
ENSMUSG00000052957	Gas1	0.00752925	-1.86628	protein_coding	protein_coding	protein_coding	NA	NA	NA
ENSMUSG00000029096	Htra3	0.0271573	-1.85857	protein_coding	protein_coding	protein_coding,nonsense_mediated_decay,retained_intron	NA	NA	NA
ENSMUSG00000026610	Esrrg	8.81e-19	-1.85768	protein_coding	protein_coding	protein_coding,processed_transcript	NA	NA	NA
ENSMUSG00000031750	Il34	0.0184417	-1.84762	protein_coding	protein_coding	processed_transcript,protein_coding	NA	NA	NA
ENSMUSG00000099703	Gm28285	2.71e-05	-1.83827	protein_coding	protein_coding	protein_coding,processed_transcript	NA	NA	NA
ENSMUSG00000033032	Afap1l1	4.93e-17	-1.8367	protein_coding	protein_coding	protein_coding,nonsense_mediated_decay,retained_intron	NA	NA	NA
ENSMUSG00000024654	Asrgl1	3.07e-07	-1.8339	protein_coding	protein_coding	protein_coding,processed_transcript	NA	NA	NA
ENSMUSG00000029414	Kntc1	2.03e-08	-1.83125	protein_coding	protein_coding	retained_intron,protein_coding,processed_transcript,nonsense_mediated_decay	NA	NA	NA
ENSMUSG00000078650	G6pc	0.020345	-1.82987	protein_coding	protein_coding	protein_coding	NA	NA	NA
ENSMUSG00000029541	Cyp2w1	0.00027825	-1.82482	protein_coding	protein_coding	protein_coding,retained_intron	NA	NA	NA
ENSMUSG00000026196	Bard1	3.85e-14	-1.82087	protein_coding	protein_coding	protein_coding	NA	NA	NA
ENSMUSG00000051278	Zgrf1	2.06e-05	-1.81909	protein_coding	protein_coding	protein_coding,nonsense_mediated_decay,retained_intron	NA	NA	NA
ENSMUSG00000020534	Shmt1	2e-14	-1.81877	protein_coding	protein_coding	protein_coding,processed_transcript,nonsense_mediated_decay,retained_intron	NA	NA	NA
ENSMUSG00000075543	Urad	0.000478908	-1.81604	protein_coding	protein_coding	protein_coding	NA	NA	NA
ENSMUSG00000030935	Acsm3	8.53e-05	-1.81428	protein_coding	protein_coding	protein_coding,retained_intron	NA	NA	NA
ENSMUSG00000034023	Fancd2	2.35e-07	-1.79959	protein_coding	protein_coding	protein_coding,retained_intron,nonsense_mediated_decay	NA	NA	NA
ENSMUSG00000041390	Mdfic	0.00014945	-1.79728	protein_coding	protein_coding	protein_coding,nonsense_mediated_decay	NA	NA	NA
ENSMUSG00000024352	Spata24	7.54e-06	-1.79436	protein_coding	protein_coding	protein_coding	NA	NA	NA
ENSMUSG00000000142	Axin2	0.000922964	-1.79381	protein_coding	protein_coding	protein_coding,processed_transcript	NA	NA	NA
ENSMUSG00000032815	Fanca	7.03e-09	-1.78684	protein_coding	protein_coding	protein_coding,retained_intron,processed_transcript	NA	NA	NA
ENSMUSG00000037991	Rmi2	2.43e-07	-1.78336	protein_coding	protein_coding	protein_coding,nonsense_mediated_decay	NA	NA	NA
ENSMUSG00000052852	Reep1	0.000208906	-1.78326	protein_coding	protein_coding	protein_coding	NA	NA	NA
ENSMUSG00000065952	C330021F23Rik	0.00297301	-1.77394	protein_coding	protein_coding	retained_intron,protein_coding	NA	NA	NA
ENSMUSG00000037033	Clca3b	0.0179709	-1.77207	protein_coding	protein_coding	protein_coding	NA	NA	NA
ENSMUSG00000042985	Upk3b	0.0265776	-1.768	protein_coding	protein_coding	protein_coding	NA	NA	NA
ENSMUSG00000051457	Spn	0.0393083	-1.76758	protein_coding	protein_coding	nonsense_mediated_decay,protein_coding	NA	NA	NA
ENSMUSG00000021572	Cep72	4.55e-20	-1.76594	protein_coding	protein_coding	protein_coding	NA	NA	NA
ENSMUSG00000036768	Kif15	2.42e-07	-1.7645	protein_coding	protein_coding	protein_coding,nonsense_mediated_decay,retained_intron,processed_transcript	NA	NA	NA
ENSMUSG00000066952	Myo1h	0.0230506	-1.76432	protein_coding	protein_coding	protein_coding,retained_intron,processed_transcript	NA	NA	NA
ENSMUSG00000060550	H2-Q7	0.00215206	-1.76168	protein_coding	protein_coding	protein_coding,retained_intron	NA	NA	NA
ENSMUSG00000018554	Ybx2	0.00219014	-1.75094	protein_coding	protein_coding	protein_coding,retained_intron	NA	NA	NA
ENSMUSG00000038644	Pold1	8.06e-09	-1.74432	protein_coding	protein_coding	protein_coding,retained_intron,nonsense_mediated_decay	NA	NA	NA
ENSMUSG00000031220	Awat2	5.67e-05	-1.73557	protein_coding	protein_coding	protein_coding	NA	NA	NA
ENSMUSG00000017861	Mybl2	1.09e-07	-1.73337	protein_coding	protein_coding	protein_coding,processed_transcript,retained_intron	NA	NA	NA
ENSMUSG00000000782	Tcf7	9.78e-21	-1.73061	protein_coding	protein_coding	protein_coding	NA	NA	NA
ENSMUSG00000028003	Lrat	1.85e-09	-1.72578	protein_coding	protein_coding	protein_coding	NA	NA	NA
ENSMUSG00000028236	Sdr16c5	0.0020156	-1.72125	protein_coding	protein_coding	protein_coding,processed_transcript	NA	NA	NA
ENSMUSG00000028438	Kif24	4.18e-09	-1.7193	protein_coding	protein_coding	protein_coding,processed_transcript	NA	NA	NA
ENSMUSG00000074825	Itpripl1	5.76e-16	-1.71806	protein_coding	protein_coding	protein_coding	NA	NA	NA
ENSMUSG00000072620	Slfn2	0.00156704	-1.71739	protein_coding	protein_coding	protein_coding	NA	NA	NA
ENSMUSG00000033906	Zdhhc15	0.00273817	-1.71515	protein_coding	protein_coding	protein_coding	NA	NA	NA
ENSMUSG00000019737	Syne4	1.31e-05	-1.71334	protein_coding	protein_coding	processed_transcript,protein_coding,retained_intron,nonsense_mediated_decay	NA	NA	NA
ENSMUSG00000047996	Prrg1	0.000141639	-1.7086	protein_coding	protein_coding	protein_coding,processed_transcript,retained_intron	NA	NA	NA
ENSMUSG00000028587	Orc1	1.39e-06	-1.70702	protein_coding	protein_coding	processed_transcript,protein_coding	NA	NA	NA
ENSMUSG00000028702	Rad54l	6.73e-16	-1.70406	protein_coding	protein_coding	processed_transcript,protein_coding	NA	NA	NA
ENSMUSG00000020712	Tcam1	0.0179009	-1.70118	protein_coding	protein_coding	nonsense_mediated_decay,protein_coding	NA	NA	NA
ENSMUSG00000037509	Arhgef4	3.42e-05	-1.69594	protein_coding	protein_coding	protein_coding,retained_intron,nonsense_mediated_decay	NA	NA	NA
ENSMUSG00000073409	H2-Q6	0.00334375	-1.69499	protein_coding	protein_coding	protein_coding	NA	NA	NA
ENSMUSG00000022034	Esco2	6.05e-10	-1.6935	protein_coding	protein_coding	protein_coding,processed_transcript	NA	NA	NA
ENSMUSG00000028391	Wdr31	2.91e-07	-1.69335	protein_coding	protein_coding	processed_transcript,protein_coding,retained_intron	NA	NA	NA
ENSMUSG00000026779	Mastl	1.31e-08	-1.69072	protein_coding	protein_coding	protein_coding,processed_transcript	NA	NA	NA
ENSMUSG00000025665	Rps6ka6	1.25e-05	-1.69009	protein_coding	protein_coding	protein_coding,nonsense_mediated_decay	NA	NA	NA
ENSMUSG00000001520	Nrip2	0.0177566	-1.69007	protein_coding	protein_coding	protein_coding,nonsense_mediated_decay,retained_intron,non_stop_decay	NA	NA	NA
ENSMUSG00000040543	Pitpnm3	5.33e-05	-1.68186	protein_coding	protein_coding	protein_coding,processed_transcript,retained_intron	NA	NA	NA
ENSMUSG00000030543	Mesp2	1.41e-05	-1.67394	protein_coding	protein_coding	protein_coding	NA	NA	NA
ENSMUSG00000005360	Slc1a3	5.82e-07	-1.66568	protein_coding	protein_coding	protein_coding,retained_intron,processed_transcript	NA	NA	NA
ENSMUSG00000034303	Ccdc15	2.2e-06	-1.66472	protein_coding	protein_coding	protein_coding,retained_intron,nonsense_mediated_decay	NA	NA	NA
ENSMUSG00000053414	Hunk	5.45e-24	-1.66171	protein_coding	protein_coding	protein_coding	NA	NA	NA
ENSMUSG00000068101	Cenpm	2.43e-06	-1.65965	protein_coding	protein_coding	protein_coding	NA	NA	NA
ENSMUSG00000031430	Vsig1	0.0450252	-1.65875	protein_coding	protein_coding	protein_coding,processed_transcript	NA	NA	NA
ENSMUSG00000078773	Rad54b	1.73e-06	-1.65765	protein_coding	protein_coding	processed_transcript,protein_coding,nonsense_mediated_decay,retained_intron	NA	NA	NA
ENSMUSG00000022949	Clic6	0.00513216	-1.65763	protein_coding	protein_coding	protein_coding	NA	NA	NA
ENSMUSG00000069793	Slfn9	3.87e-05	-1.6559	protein_coding	protein_coding	protein_coding	NA	NA	NA
ENSMUSG00000051517	Arhgef39	0.000189477	-1.65456	protein_coding	protein_coding	protein_coding,processed_transcript	NA	NA	NA
ENSMUSG00000061607	Mdc1	6.52e-16	-1.65122	protein_coding	protein_coding	protein_coding	NA	NA	NA
ENSMUSG00000027978	Prss12	1.29e-09	-1.64845	protein_coding	protein_coding	protein_coding	NA	NA	NA
ENSMUSG00000027326	Knl1	2.14e-05	-1.64812	protein_coding	protein_coding	protein_coding	NA	NA	NA
ENSMUSG00000035165	Kcne3	0.000109542	-1.6386	protein_coding	protein_coding	processed_transcript,protein_coding	NA	NA	NA
ENSMUSG00000019945	1700040L02Rik	2.64e-07	-1.63711	protein_coding	protein_coding	protein_coding	NA	NA	NA
ENSMUSG00000003824	Syce2	2.37e-06	-1.6328	protein_coding	protein_coding	protein_coding,nonsense_mediated_decay,retained_intron	NA	NA	NA
ENSMUSG00000069805	Fbp1	0.035994	-1.62854	protein_coding	protein_coding	protein_coding,nonsense_mediated_decay	NA	NA	NA
ENSMUSG00000024525	Impa2	1.54e-06	-1.62641	protein_coding	protein_coding	protein_coding	NA	NA	NA
ENSMUSG00000033952	Aspm	8.01e-13	-1.62598	protein_coding	protein_coding	protein_coding,retained_intron,processed_transcript	NA	NA	NA
ENSMUSG00000001761	Smo	0.00016996	-1.62186	protein_coding	protein_coding	retained_intron,protein_coding	NA	NA	NA
ENSMUSG00000074715	Ccl28	5.73e-09	-1.61766	protein_coding	protein_coding	protein_coding	NA	NA	NA
ENSMUSG00000017607	Tns4	0.000692525	-1.6175	protein_coding	protein_coding	protein_coding,processed_transcript,retained_intron	NA	NA	NA
ENSMUSG00000058290	Espl1	1.79e-10	-1.61539	protein_coding	protein_coding	protein_coding	NA	NA	NA
ENSMUSG00000034906	Ncaph	8.87e-10	-1.61305	protein_coding	protein_coding	protein_coding,retained_intron,nonsense_mediated_decay,processed_transcript	NA	NA	NA
ENSMUSG00000079685	Ulbp1	0.000151504	-1.61264	protein_coding	protein_coding	protein_coding	NA	NA	NA
ENSMUSG00000028687	Mutyh	1.21e-06	-1.612	protein_coding	protein_coding	protein_coding,retained_intron,nonsense_mediated_decay	NA	NA	NA
ENSMUSG00000035455	Fignl1	1.14e-08	-1.61184	protein_coding	protein_coding	processed_transcript,protein_coding	NA	NA	NA
ENSMUSG00000024905	Mtl5	0.0417714	-1.60669	protein_coding	protein_coding	protein_coding	NA	NA	NA
ENSMUSG00000026923	Notch1	6.61e-05	-1.60639	protein_coding	protein_coding	protein_coding,processed_transcript,retained_intron	NA	NA	NA
ENSMUSG00000026605	Cenpf	0.000923509	-1.60563	protein_coding	protein_coding	protein_coding,retained_intron,nonsense_mediated_decay	NA	NA	NA
ENSMUSG00000078653	Cntd1	0.00412686	-1.60345	protein_coding	protein_coding	processed_transcript,protein_coding	NA	NA	NA
ENSMUSG00000032323	Cyp11a1	0.0297138	-1.60212	protein_coding	protein_coding	protein_coding,retained_intron	NA	NA	NA
ENSMUSG00000086965	Gm16314	1.98e-08	-1.59793	protein_coding	protein_coding	protein_coding	NA	NA	NA
ENSMUSG00000026039	Sgol2a	2.48e-09	-1.58904	protein_coding	protein_coding	protein_coding,retained_intron	NA	NA	NA
ENSMUSG00000027878	Notch2	1.24e-09	-1.58752	protein_coding	protein_coding	retained_intron,protein_coding	NA	NA	NA
ENSMUSG00000039748	Exo1	7.95e-06	-1.58611	protein_coding	protein_coding	protein_coding,retained_intron,processed_transcript	NA	NA	NA
ENSMUSG00000025574	Tk1	5.41e-08	-1.58548	protein_coding	protein_coding	protein_coding,retained_intron	NA	NA	NA
ENSMUSG00000022422	Dscc1	0.000438463	-1.58362	protein_coding	protein_coding	protein_coding,retained_intron	NA	NA	NA
ENSMUSG00000038180	Spag4	0.0216489	-1.58232	protein_coding	protein_coding	retained_intron,protein_coding,nonsense_mediated_decay,processed_transcript	NA	NA	NA
ENSMUSG00000022673	Mcm4	3.61e-07	-1.5807	protein_coding	protein_coding	protein_coding	NA	NA	NA
ENSMUSG00000022033	Pbk	1.9e-08	-1.57466	protein_coding	protein_coding	protein_coding,processed_transcript	NA	NA	NA
ENSMUSG00000046591	Ticrr	7.44e-07	-1.57465	protein_coding	protein_coding	protein_coding,retained_intron,nonsense_mediated_decay,processed_transcript	NA	NA	NA
ENSMUSG00000031629	Cenpu	7.24e-05	-1.57385	protein_coding	protein_coding	protein_coding,retained_intron,nonsense_mediated_decay,processed_transcript	NA	NA	NA
ENSMUSG00000026489	Coq8a	5.06e-09	-1.5728	protein_coding	protein_coding	protein_coding,nonsense_mediated_decay,retained_intron	NA	NA	NA
ENSMUSG00000022945	Chaf1b	2.61e-05	-1.5702	protein_coding	protein_coding	protein_coding,retained_intron,processed_transcript	NA	NA	NA
ENSMUSG00000006585	Cdt1	1.13e-07	-1.56542	protein_coding	protein_coding	protein_coding,retained_intron,processed_transcript	NA	NA	NA
ENSMUSG00000061533	Cep128	9.56e-05	-1.56354	protein_coding	protein_coding	protein_coding,nonsense_mediated_decay,processed_transcript,retained_intron	NA	NA	NA
ENSMUSG00000026622	Nek2	1.45e-12	-1.56225	protein_coding	protein_coding	protein_coding,retained_intron,processed_transcript	NA	NA	NA
ENSMUSG00000042489	Clspn	7.44e-07	-1.56153	protein_coding	protein_coding	protein_coding,processed_transcript	NA	NA	NA
ENSMUSG00000031821	Gins2	1.81e-09	-1.55796	protein_coding	protein_coding	protein_coding,retained_intron,processed_transcript	NA	NA	NA
ENSMUSG00000001517	Foxm1	1.14e-09	-1.55713	protein_coding	protein_coding	protein_coding,processed_transcript,retained_intron	NA	NA	NA
ENSMUSG00000005410	Mcm5	9.09e-07	-1.55708	protein_coding	protein_coding	protein_coding,retained_intron	NA	NA	NA
ENSMUSG00000039396	Neil3	9.93e-09	-1.55544	protein_coding	protein_coding	protein_coding,processed_transcript,retained_intron	NA	NA	NA
ENSMUSG00000030825	Hsd17b14	0.0346708	-1.555	protein_coding	protein_coding	protein_coding,nonsense_mediated_decay,retained_intron,processed_transcript	NA	NA	NA
ENSMUSG00000041406	BC055324	1.44e-05	-1.55262	protein_coding	protein_coding	protein_coding,nonsense_mediated_decay,retained_intron,processed_transcript	NA	NA	NA
ENSMUSG00000023940	Sgol1	1.73e-06	-1.55206	protein_coding	protein_coding	protein_coding,processed_transcript	NA	NA	NA
ENSMUSG00000036863	Syde2	4.39e-13	-1.55109	protein_coding	protein_coding	protein_coding,processed_transcript	NA	NA	NA
ENSMUSG00000051811	Cox6b2	0.0182964	-1.55079	protein_coding	protein_coding	protein_coding,nonsense_mediated_decay,retained_intron	NA	NA	NA
ENSMUSG00000005470	Asf1b	1.35e-12	-1.54978	protein_coding	protein_coding	protein_coding,processed_transcript,retained_intron	NA	NA	NA
ENSMUSG00000026389	Steap3	4.45e-10	-1.54648	protein_coding	protein_coding	protein_coding	NA	NA	NA
ENSMUSG00000020974	Pole2	1.64e-07	-1.54611	protein_coding	protein_coding	protein_coding	NA	NA	NA
ENSMUSG00000027715	Ccna2	1.89e-17	-1.54231	protein_coding	protein_coding	protein_coding,processed_transcript,nonsense_mediated_decay,retained_intron	NA	NA	NA
ENSMUSG00000026429	Ube2t	1.03e-08	-1.54075	protein_coding	protein_coding	protein_coding,retained_intron	NA	NA	NA
ENSMUSG00000016262	Sertad4	3.81e-05	-1.53724	protein_coding	protein_coding	protein_coding,processed_transcript	NA	NA	NA
ENSMUSG00000039103	Nexn	0.00893606	-1.53485	protein_coding	protein_coding	protein_coding,processed_transcript,retained_intron,nonsense_mediated_decay	NA	NA	NA
ENSMUSG00000019982	Myb	2.97e-05	-1.53361	protein_coding	protein_coding	protein_coding,retained_intron,processed_transcript	NA	NA	NA
ENSMUSG00000038264	Sema7a	8.59e-11	-1.5311	protein_coding	protein_coding	nonsense_mediated_decay,protein_coding	NA	NA	NA
ENSMUSG00000035606	Ky	6.75e-05	-1.52919	protein_coding	protein_coding	protein_coding,retained_intron	NA	NA	NA
ENSMUSG00000019917	2010-09-01	2.86e-14	-1.52907	protein_coding	protein_coding	protein_coding	NA	NA	NA
ENSMUSG00000074476	Spc24	8.12e-07	-1.52869	protein_coding	protein_coding	protein_coding,retained_intron	NA	NA	NA
ENSMUSG00000025758	Plk4	4.75e-08	-1.5273	protein_coding	protein_coding	protein_coding,retained_intron,nonsense_mediated_decay	NA	NA	NA
ENSMUSG00000026274	Pask	4.95e-07	-1.52601	protein_coding	protein_coding	retained_intron,protein_coding	NA	NA	NA
ENSMUSG00000037725	Ckap2	2.28e-07	-1.52511	protein_coding	protein_coding	protein_coding,retained_intron	NA	NA	NA
ENSMUSG00000041064	Pif1	1.89e-09	-1.52398	protein_coding	protein_coding	protein_coding,nonsense_mediated_decay,retained_intron	NA	NA	NA
ENSMUSG00000017146	Brca1	2.09e-07	-1.52163	protein_coding	protein_coding	protein_coding,retained_intron,processed_transcript,nonsense_mediated_decay	NA	NA	NA
ENSMUSG00000059149	Mfsd4a	0.0110734	-1.51775	protein_coding	protein_coding	protein_coding,retained_intron,nonsense_mediated_decay,processed_transcript	NA	NA	NA
ENSMUSG00000071103	1700029J07Rik	0.000695873	-1.51672	protein_coding	protein_coding	protein_coding	NA	NA	NA
ENSMUSG00000030254	Rad18	1.57e-15	-1.51434	protein_coding	protein_coding	protein_coding,processed_transcript,nonsense_mediated_decay,retained_intron	NA	NA	NA
ENSMUSG00000020176	Grb10	8.55e-06	-1.51353	protein_coding	protein_coding	protein_coding,processed_transcript	NA	NA	NA
ENSMUSG00000050379	2006-09-01	1.24e-13	-1.51273	protein_coding	protein_coding	protein_coding,retained_intron	NA	NA	NA
ENSMUSG00000025265	Fgd1	4.65e-09	-1.51059	protein_coding	protein_coding	protein_coding,retained_intron	NA	NA	NA
ENSMUSG00000020897	Aurkb	3.32e-08	-1.51038	protein_coding	protein_coding	protein_coding,processed_transcript,retained_intron	NA	NA	NA
ENSMUSG00000039994	Timeless	9.83e-05	-1.5096	protein_coding	protein_coding	protein_coding,retained_intron,processed_transcript	NA	NA	NA
ENSMUSG00000032783	Troap	7.44e-07	-1.50703	protein_coding	protein_coding	protein_coding	NA	NA	NA
ENSMUSG00000042367	Gjb3	2.56e-07	-1.50579	protein_coding	protein_coding	protein_coding	NA	NA	NA
ENSMUSG00000028527	Ak4	0.0207638	-1.50552	protein_coding	protein_coding	protein_coding,processed_transcript	NA	NA	NA
ENSMUSG00000025912	Mybl1	0.00748575	-1.49955	protein_coding	protein_coding	protein_coding,retained_intron	NA	NA	NA
ENSMUSG00000039063	Echdc3	2.51e-05	-1.49457	protein_coding	protein_coding	protein_coding,processed_transcript,retained_intron	NA	NA	NA
ENSMUSG00000020808	Fam64a	0.00139884	-1.49408	protein_coding	protein_coding	protein_coding,processed_transcript	NA	NA	NA
ENSMUSG00000034773	BC030867	3.01e-07	-1.49375	protein_coding	protein_coding	protein_coding,nonsense_mediated_decay,processed_transcript	NA	NA	NA
ENSMUSG00000075610	Tmem92	9.16e-07	-1.49357	protein_coding	protein_coding	protein_coding,nonsense_mediated_decay	NA	NA	NA
ENSMUSG00000048922	Cdca2	3.23e-10	-1.4932	protein_coding	protein_coding	protein_coding,nonsense_mediated_decay,retained_intron	NA	NA	NA
ENSMUSG00000030528	Blm	5.58e-07	-1.49257	protein_coding	protein_coding	protein_coding,processed_transcript,retained_intron,nonsense_mediated_decay	NA	NA	NA
ENSMUSG00000032400	Zwilch	3.65e-05	-1.48931	protein_coding	protein_coding	protein_coding,retained_intron,nonsense_mediated_decay	NA	NA	NA
ENSMUSG00000032113	Chek1	6.48e-09	-1.48921	protein_coding	protein_coding	protein_coding,processed_transcript,retained_intron	NA	NA	NA
ENSMUSG00000073705	Apitd1	0.00203856	-1.48839	protein_coding	protein_coding	nonsense_mediated_decay,protein_coding,retained_intron	NA	NA	NA
ENSMUSG00000047534	Mis18bp1	3.11e-10	-1.48719	protein_coding	protein_coding	protein_coding,retained_intron,processed_transcript	NA	NA	NA
ENSMUSG00000064109	Hcst	0.0196463	-1.48494	protein_coding	protein_coding	protein_coding,retained_intron	NA	NA	NA
ENSMUSG00000035365	Parpbp	5.27e-06	-1.48386	protein_coding	protein_coding	protein_coding	NA	NA	NA
ENSMUSG00000032380	Dapk2	1.15e-06	-1.48383	protein_coding	protein_coding	protein_coding,retained_intron,nonsense_mediated_decay	NA	NA	NA
ENSMUSG00000020493	Prr11	2.45e-09	-1.48373	protein_coding	protein_coding	protein_coding	NA	NA	NA
ENSMUSG00000029516	Cit	2.47e-09	-1.48303	protein_coding	protein_coding	retained_intron,protein_coding,processed_transcript,nonsense_mediated_decay	NA	NA	NA
ENSMUSG00000027379	Bub1	4.05e-08	-1.48274	protein_coding	protein_coding	protein_coding,retained_intron,processed_transcript	NA	NA	NA
ENSMUSG00000027115	Kif18a	2.32e-08	-1.47957	protein_coding	protein_coding	protein_coding,retained_intron	NA	NA	NA
ENSMUSG00000031004	Mki67	3.86e-08	-1.4787	protein_coding	protein_coding	protein_coding	NA	NA	NA
ENSMUSG00000016526	Dyrk3	1.37e-08	-1.4768	protein_coding	protein_coding	protein_coding	NA	NA	NA
ENSMUSG00000031448	Adprhl1	0.0286568	-1.476	protein_coding	protein_coding	protein_coding,retained_intron	NA	NA	NA
ENSMUSG00000033763	Mtss1l	0.0270379	-1.47404	protein_coding	protein_coding	protein_coding,processed_transcript,retained_intron	NA	NA	NA
ENSMUSG00000049588	Ccdc69	0.00109607	-1.47368	protein_coding	protein_coding	protein_coding	NA	NA	NA
ENSMUSG00000021604	Irx4	0.00886996	-1.47291	protein_coding	protein_coding	protein_coding	NA	NA	NA
ENSMUSG00000020101	Vsir	0.00487765	-1.46951	protein_coding	protein_coding	protein_coding,processed_transcript,retained_intron	NA	NA	NA
ENSMUSG00000034768	Asb16	0.00123317	-1.46938	protein_coding	protein_coding	protein_coding	NA	NA	NA
ENSMUSG00000028312	Smc2	5.82e-09	-1.46898	protein_coding	protein_coding	protein_coding,processed_transcript	NA	NA	NA
ENSMUSG00000036053	Fmnl2	0.000186334	-1.46866	protein_coding	protein_coding	protein_coding	NA	NA	NA
ENSMUSG00000029521	Chek2	1.27e-07	-1.46812	protein_coding	protein_coding	protein_coding,nonsense_mediated_decay,retained_intron,processed_transcript	NA	NA	NA
ENSMUSG00000029847	Slc23a4	5.61e-10	-1.46685	protein_coding	protein_coding	protein_coding,processed_transcript	NA	NA	NA
ENSMUSG00000046179	E2f8	5.45e-08	-1.46628	protein_coding	protein_coding	protein_coding,retained_intron	NA	NA	NA
ENSMUSG00000056394	Lig1	1.17e-08	-1.46623	protein_coding	protein_coding	processed_transcript,protein_coding,retained_intron	NA	NA	NA
ENSMUSG00000026683	Nuf2	6.66e-10	-1.46581	protein_coding	protein_coding	protein_coding,retained_intron	NA	NA	NA
ENSMUSG00000026355	Mcm6	1.36e-06	-1.4642	protein_coding	protein_coding	protein_coding,retained_intron	NA	NA	NA
ENSMUSG00000054659	Pm20d2	2.69e-05	-1.46257	protein_coding	protein_coding	protein_coding	NA	NA	NA
ENSMUSG00000032555	Topbp1	1.69e-10	-1.46038	protein_coding	protein_coding	protein_coding,retained_intron,nonsense_mediated_decay	NA	NA	NA
ENSMUSG00000031853	BC021891	4.93e-14	-1.45976	protein_coding	protein_coding	protein_coding	NA	NA	NA
ENSMUSG00000006494	Pdk1	0.000123694	-1.45918	protein_coding	protein_coding	protein_coding,processed_transcript	NA	NA	NA
ENSMUSG00000037583	Nr0b2	0.047609	-1.4561	protein_coding	protein_coding	protein_coding	NA	NA	NA
ENSMUSG00000045751	Mms22l	3.52e-06	-1.45405	protein_coding	protein_coding	protein_coding,retained_intron,processed_transcript,nonsense_mediated_decay	NA	NA	NA
ENSMUSG00000057604	Lmcd1	0.000501878	-1.45298	protein_coding	protein_coding	protein_coding	NA	NA	NA
ENSMUSG00000017499	Cdc6	3.48e-06	-1.45219	protein_coding	protein_coding	protein_coding,nonsense_mediated_decay,retained_intron	NA	NA	NA
ENSMUSG00000099032	Tcf24	0.0325974	-1.45197	protein_coding	protein_coding	protein_coding	NA	NA	NA
ENSMUSG00000038742	Angptl6	0.00225148	-1.44998	protein_coding	protein_coding	protein_coding	NA	NA	NA
ENSMUSG00000040717	Il17rd	6.34e-11	-1.44899	protein_coding	protein_coding	protein_coding	NA	NA	NA
ENSMUSG00000040274	Cdk6	3.26e-10	-1.44661	protein_coding	protein_coding	protein_coding,retained_intron	NA	NA	NA
ENSMUSG00000024891	Slc29a2	6.67e-06	-1.44633	protein_coding	protein_coding	protein_coding	NA	NA	NA
ENSMUSG00000051378	Kif18b	3.06e-08	-1.44501	protein_coding	protein_coding	protein_coding,processed_transcript	NA	NA	NA
ENSMUSG00000029101	Rgs12	2.9e-06	-1.44446	protein_coding	protein_coding	protein_coding,retained_intron,processed_transcript	NA	NA	NA
ENSMUSG00000051220	Ercc6l	2.92e-09	-1.44268	protein_coding	protein_coding	protein_coding	NA	NA	NA
ENSMUSG00000019303	Psmc3ip	2.86e-06	-1.44231	protein_coding	protein_coding	protein_coding,retained_intron,nonsense_mediated_decay	NA	NA	NA
ENSMUSG00000027699	Ect2	2.93e-13	-1.43907	protein_coding	protein_coding	protein_coding,nonsense_mediated_decay,retained_intron	NA	NA	NA
ENSMUSG00000078521	Aunip	3.86e-05	-1.43809	protein_coding	protein_coding	protein_coding	NA	NA	NA
ENSMUSG00000044005	Gls2	2.78e-06	-1.43776	protein_coding	protein_coding	protein_coding,nonsense_mediated_decay,processed_transcript,retained_intron	NA	NA	NA
ENSMUSG00000042213	Zfand4	0.00230506	-1.43768	protein_coding	protein_coding	protein_coding	NA	NA	NA
ENSMUSG00000019947	Arid5b	1.43e-10	-1.43728	protein_coding	protein_coding	protein_coding	NA	NA	NA
ENSMUSG00000019992	Mtfr2	1.13e-06	-1.43546	protein_coding	protein_coding	protein_coding,processed_transcript	NA	NA	NA
ENSMUSG00000022360	Atad2	5.02e-07	-1.4315	protein_coding	protein_coding	protein_coding	NA	NA	NA
ENSMUSG00000038379	Ttk	1.94e-08	-1.43141	protein_coding	protein_coding	retained_intron,protein_coding,processed_transcript	NA	NA	NA
ENSMUSG00000030346	Rad51ap1	0.00033055	-1.43116	protein_coding	protein_coding	protein_coding,retained_intron,processed_transcript,nonsense_mediated_decay	NA	NA	NA
ENSMUSG00000042029	Ncapg2	4.36e-07	-1.42427	protein_coding	protein_coding	protein_coding	NA	NA	NA
ENSMUSG00000089774	Slc5a3	4.12e-10	-1.42357	protein_coding	protein_coding	protein_coding	NA	NA	NA
ENSMUSG00000031262	Cenpi	1.44e-11	-1.42254	protein_coding	protein_coding	protein_coding,processed_transcript	NA	NA	NA
ENSMUSG00000026646	Suv39h2	1.56e-08	-1.42246	protein_coding	protein_coding	protein_coding,nonsense_mediated_decay	NA	NA	NA
ENSMUSG00000022519	Srl	2.56e-06	-1.42197	protein_coding	protein_coding	protein_coding,processed_transcript,retained_intron	NA	NA	NA
ENSMUSG00000022231	Sema5a	0.000679522	-1.42062	protein_coding	protein_coding	protein_coding	NA	NA	NA
ENSMUSG00000009418	Nav1	0.00422832	-1.42	protein_coding	protein_coding	protein_coding,retained_intron,processed_transcript	NA	NA	NA
ENSMUSG00000041075	Fzd7	2.37e-08	-1.41959	protein_coding	protein_coding	protein_coding	NA	NA	NA
ENSMUSG00000027424	Mgme1	1.72e-07	-1.41822	protein_coding	protein_coding	protein_coding	NA	NA	NA
ENSMUSG00000039187	Fanci	1.97e-06	-1.4173	protein_coding	protein_coding	protein_coding,nonsense_mediated_decay	NA	NA	NA
ENSMUSG00000033752	Mnd1	0.000260388	-1.41402	protein_coding	protein_coding	protein_coding	NA	NA	NA
ENSMUSG00000028949	Smarcd3	0.0379783	-1.41133	protein_coding	protein_coding	retained_intron,protein_coding,processed_transcript	NA	NA	NA
ENSMUSG00000007080	Pole	8.82e-09	-1.41117	protein_coding	protein_coding	protein_coding,retained_intron	NA	NA	NA
ENSMUSG00000031957	Ctrb1	0.00256205	-1.41102	protein_coding	protein_coding	protein_coding	NA	NA	NA
ENSMUSG00000029283	Cdc7	5.25e-06	-1.41036	protein_coding	protein_coding	protein_coding,retained_intron,nonsense_mediated_decay,processed_transcript	NA	NA	NA
ENSMUSG00000038146	Notch3	0.00147906	-1.40917	protein_coding	protein_coding	protein_coding	NA	NA	NA
ENSMUSG00000027246	Ell3	4.69e-10	-1.40734	protein_coding	protein_coding	protein_coding,retained_intron	NA	NA	NA
ENSMUSG00000036777	Anln	6.7e-09	-1.40686	protein_coding	protein_coding	protein_coding,retained_intron	NA	NA	NA
ENSMUSG00000054612	Mgmt	0.00977983	-1.4062	protein_coding	protein_coding	protein_coding	NA	NA	NA
ENSMUSG00000041498	Kif14	6.97e-06	-1.40522	protein_coding	protein_coding	retained_intron,protein_coding,nonsense_mediated_decay,processed_transcript	NA	NA	NA
ENSMUSG00000023963	Cyp39a1	2.02e-07	-1.4021	protein_coding	protein_coding	protein_coding	NA	NA	NA
ENSMUSG00000029312	Klhl8	1.37e-05	-1.40118	protein_coding	protein_coding	protein_coding,nonsense_mediated_decay,retained_intron	NA	NA	NA
ENSMUSG00000046794	Ppp1r3b	0.00132147	-1.39976	protein_coding	protein_coding	protein_coding,processed_transcript	NA	NA	NA
ENSMUSG00000048327	Ckap2l	3.85e-11	-1.39887	protein_coding	protein_coding	protein_coding	NA	NA	NA
ENSMUSG00000044350	Lacc1	4.14e-08	-1.39811	protein_coding	protein_coding	protein_coding,retained_intron	NA	NA	NA
ENSMUSG00000032640	Chsy1	0.000747902	-1.39676	protein_coding	protein_coding	protein_coding	NA	NA	NA
ENSMUSG00000019214	Chtf18	7.24e-07	-1.3942	protein_coding	protein_coding	protein_coding,nonsense_mediated_decay,retained_intron	NA	NA	NA
ENSMUSG00000002870	Mcm2	5.89e-07	-1.39353	protein_coding	protein_coding	protein_coding,retained_intron,nonsense_mediated_decay,processed_transcript	NA	NA	NA
ENSMUSG00000017550	Atad5	6.49e-06	-1.39294	protein_coding	protein_coding	protein_coding,processed_transcript,retained_intron	NA	NA	NA
ENSMUSG00000027242	Wdr76	3.82e-10	-1.3927	protein_coding	protein_coding	protein_coding,retained_intron	NA	NA	NA
ENSMUSG00000027752	Exosc8	3.04e-06	-1.38976	protein_coding	protein_coding	protein_coding,retained_intron,nonsense_mediated_decay	NA	NA	NA
ENSMUSG00000040084	Bub1b	4.19e-10	-1.38708	protein_coding	protein_coding	protein_coding,retained_intron	NA	NA	NA
ENSMUSG00000036875	Dna2	8.65e-13	-1.38573	protein_coding	protein_coding	protein_coding,nonsense_mediated_decay,retained_intron	NA	NA	NA
ENSMUSG00000072980	Oip5	0.0241622	-1.3844	protein_coding	protein_coding	retained_intron,protein_coding	NA	NA	NA
ENSMUSG00000022177	Haus4	2.34e-09	-1.38424	protein_coding	protein_coding	protein_coding	NA	NA	NA
ENSMUSG00000029730	Mcm7	6.45e-06	-1.38416	protein_coding	protein_coding	protein_coding,retained_intron	NA	NA	NA
ENSMUSG00000024795	Kif20b	2.67e-10	-1.38349	protein_coding	protein_coding	protein_coding	NA	NA	NA
ENSMUSG00000034579	Pla2g3	0.0109215	-1.38314	protein_coding	protein_coding	protein_coding,nonsense_mediated_decay,retained_intron	NA	NA	NA
ENSMUSG00000028212	Ccne2	0.00015962	-1.38161	protein_coding	protein_coding	processed_transcript,protein_coding	NA	NA	NA
ENSMUSG00000062510	Nsl1	0.00291357	-1.38147	protein_coding	protein_coding	protein_coding	NA	NA	NA
ENSMUSG00000033762	Recql4	2.12e-08	-1.38051	protein_coding	protein_coding	protein_coding	NA	NA	NA
ENSMUSG00000019773	Fbxo5	2.3e-06	-1.38033	protein_coding	protein_coding	protein_coding,processed_transcript	NA	NA	NA
ENSMUSG00000044934	Zfp367	5.24e-09	-1.38022	protein_coding	protein_coding	protein_coding,processed_transcript	NA	NA	NA
ENSMUSG00000002835	Chaf1a	4.04e-09	-1.37974	protein_coding	protein_coding	protein_coding	NA	NA	NA
ENSMUSG00000006678	Pola1	2.03e-05	-1.37913	protein_coding	protein_coding	protein_coding,processed_transcript,retained_intron	NA	NA	NA
ENSMUSG00000020649	Rrm2	1.46e-08	-1.37803	protein_coding	protein_coding	protein_coding,retained_intron	NA	NA	NA
ENSMUSG00000019732	Calr3	0.000379537	-1.37303	protein_coding	protein_coding	protein_coding	NA	NA	NA
ENSMUSG00000048012	Zfp473	3.17e-05	-1.37234	protein_coding	protein_coding	protein_coding	NA	NA	NA
ENSMUSG00000034275	Igsf9b	1.3e-06	-1.37111	protein_coding	protein_coding	protein_coding,retained_intron	NA	NA	NA
ENSMUSG00000027018	Hat1	1.98e-09	-1.36973	protein_coding	protein_coding	protein_coding,processed_transcript	NA	NA	NA
ENSMUSG00000021223	Papln	0.00162431	-1.3682	protein_coding	protein_coding	protein_coding,retained_intron	NA	NA	NA
ENSMUSG00000041801	Phlda3	0.0105189	-1.36788	protein_coding	protein_coding	protein_coding,processed_transcript	NA	NA	NA
ENSMUSG00000064326	Siva1	1.48e-06	-1.36545	protein_coding	protein_coding	protein_coding	NA	NA	NA
ENSMUSG00000000948	Gm38393	0.0229063	-1.36493	protein_coding	protein_coding	nonsense_mediated_decay,processed_transcript	NA	NA	NA
ENSMUSG00000024301	Kifc5b	2.67e-08	-1.36445	protein_coding	protein_coding	protein_coding	NA	NA	NA
ENSMUSG00000079553	Kifc1	4.78e-10	-1.36035	protein_coding	protein_coding	protein_coding,retained_intron	NA	NA	NA
ENSMUSG00000025154	Arhgap19	7.69e-10	-1.36006	protein_coding	protein_coding	protein_coding	NA	NA	NA
ENSMUSG00000038745	Nlrp6	3.58e-05	-1.35981	protein_coding	protein_coding	protein_coding,retained_intron	NA	NA	NA
ENSMUSG00000023015	Racgap1	3.88e-10	-1.35877	protein_coding	protein_coding	protein_coding,retained_intron,processed_transcript,nonsense_mediated_decay	NA	NA	NA
ENSMUSG00000027331	Knstrn	1.34e-08	-1.35815	protein_coding	protein_coding	protein_coding,nonsense_mediated_decay	NA	NA	NA
ENSMUSG00000024989	Cep55	1.91e-11	-1.35764	protein_coding	protein_coding	protein_coding	NA	NA	NA
ENSMUSG00000045273	Cenph	9.16e-08	-1.35664	protein_coding	protein_coding	protein_coding,retained_intron	NA	NA	NA
ENSMUSG00000026235	Epha4	0.00154417	-1.35627	protein_coding	protein_coding	protein_coding,nonsense_mediated_decay,retained_intron	NA	NA	NA
ENSMUSG00000048027	Rgmb	0.00129401	-1.35608	protein_coding	protein_coding	protein_coding	NA	NA	NA
ENSMUSG00000026785	Pkn3	0.00193637	-1.35458	protein_coding	protein_coding	protein_coding,retained_intron	NA	NA	NA
ENSMUSG00000074141	Il4i1	0.0461692	-1.35364	protein_coding	protein_coding	processed_transcript,protein_coding,retained_intron	NA	NA	NA
ENSMUSG00000043439	E130012A19Rik	0.000246543	-1.3535	protein_coding	protein_coding	protein_coding	NA	NA	NA
ENSMUSG00000000028	Cdc45	4.51e-06	-1.35201	protein_coding	protein_coding	protein_coding	NA	NA	NA
ENSMUSG00000032218	Ccnb2	7.16e-07	-1.34772	protein_coding	protein_coding	protein_coding	NA	NA	NA
ENSMUSG00000024542	Cep192	5.73e-14	-1.34597	protein_coding	protein_coding	protein_coding	NA	NA	NA
ENSMUSG00000040209	Zfp704	8.12e-12	-1.34357	protein_coding	protein_coding	protein_coding,retained_intron	NA	NA	NA
ENSMUSG00000027635	Dsn1	1.56e-07	-1.34333	protein_coding	protein_coding	protein_coding,retained_intron	NA	NA	NA
ENSMUSG00000053846	Lipg	2e-05	-1.34277	protein_coding	protein_coding	protein_coding	NA	NA	NA
ENSMUSG00000004099	Dnmt1	3.53e-10	-1.34118	protein_coding	protein_coding	protein_coding,retained_intron,processed_transcript	NA	NA	NA
ENSMUSG00000027353	Mcm8	1.5e-10	-1.34021	protein_coding	protein_coding	protein_coding,processed_transcript	NA	NA	NA
ENSMUSG00000030737	Slco2b1	0.00130989	-1.3386	protein_coding	protein_coding	protein_coding	NA	NA	NA
ENSMUSG00000028678	Kif2c	1.01e-08	-1.33808	protein_coding	protein_coding	protein_coding,retained_intron,processed_transcript	NA	NA	NA
ENSMUSG00000021965	Ska3	5.51e-11	-1.33717	protein_coding	protein_coding	protein_coding	NA	NA	NA
ENSMUSG00000028873	Cdca8	3.37e-07	-1.33523	protein_coding	protein_coding	protein_coding,processed_transcript,retained_intron	NA	NA	NA
ENSMUSG00000020303	Stc2	0.0274262	-1.33359	protein_coding	protein_coding	protein_coding,processed_transcript	NA	NA	NA
ENSMUSG00000028262	Clca3a2	0.002663	-1.33305	protein_coding	protein_coding	protein_coding,retained_intron	NA	NA	NA
ENSMUSG00000002109	Ddb2	1.58e-09	-1.33301	protein_coding	protein_coding	processed_transcript,protein_coding	NA	NA	NA
ENSMUSG00000035683	Melk	2.63e-07	-1.3323	protein_coding	protein_coding	protein_coding,processed_transcript	NA	NA	NA
ENSMUSG00000028718	Stil	1.29e-08	-1.33219	protein_coding	protein_coding	protein_coding,nonsense_mediated_decay,processed_transcript,retained_intron	NA	NA	NA
ENSMUSG00000022021	Diaph3	1.81e-10	-1.32935	protein_coding	protein_coding	protein_coding	NA	NA	NA
ENSMUSG00000043639	Rbm20	0.000752101	-1.32846	protein_coding	protein_coding	protein_coding,processed_transcript,nonsense_mediated_decay	NA	NA	NA
ENSMUSG00000019942	Cdk1	4.56e-07	-1.32755	protein_coding	protein_coding	protein_coding,retained_intron	NA	NA	NA
ENSMUSG00000032344	Mb21d1	2.35e-09	-1.32754	protein_coding	protein_coding	protein_coding,nonsense_mediated_decay	NA	NA	NA
ENSMUSG00000002055	Spag5	1.14e-07	-1.32749	protein_coding	protein_coding	protein_coding,retained_intron,processed_transcript	NA	NA	NA
ENSMUSG00000022802	Lmln	0.0159511	-1.32689	protein_coding	protein_coding	protein_coding,retained_intron,processed_transcript	NA	NA	NA
ENSMUSG00000028068	Iqgap3	1.17e-06	-1.32471	protein_coding	protein_coding	protein_coding,retained_intron,nonsense_mediated_decay	NA	NA	NA
ENSMUSG00000030787	Lyve1	0.000502332	-1.32428	protein_coding	protein_coding	protein_coding,retained_intron	NA	NA	NA
ENSMUSG00000022505	Emp2	4.31e-05	-1.31944	protein_coding	protein_coding	protein_coding	NA	NA	NA
ENSMUSG00000030934	Oat	0.010471	-1.31938	protein_coding	protein_coding	protein_coding	NA	NA	NA
ENSMUSG00000007827	Ankrd26	0.00310049	-1.31905	protein_coding	protein_coding	protein_coding,retained_intron	NA	NA	NA
ENSMUSG00000022790	Igsf11	0.00197147	-1.31718	protein_coding	protein_coding	processed_transcript,protein_coding	NA	NA	NA
ENSMUSG00000026669	Mcm10	2.23e-07	-1.31456	protein_coding	protein_coding	protein_coding,retained_intron,processed_transcript	NA	NA	NA
ENSMUSG00000027454	Gins1	9.69e-05	-1.31094	protein_coding	protein_coding	processed_transcript,protein_coding	NA	NA	NA
ENSMUSG00000027203	Dut	5.96e-05	-1.31066	protein_coding	protein_coding	protein_coding,processed_transcript	NA	NA	NA
ENSMUSG00000007646	Rad51c	9.91e-05	-1.30914	protein_coding	protein_coding	protein_coding,nonsense_mediated_decay	NA	NA	NA
ENSMUSG00000037148	Arhgap10	7.38e-08	-1.30568	protein_coding	protein_coding	protein_coding	NA	NA	NA
ENSMUSG00000044702	Palb2	0.00129734	-1.30317	protein_coding	protein_coding	protein_coding,retained_intron,nonsense_mediated_decay	NA	NA	NA
ENSMUSG00000033083	Tbc1d4	2.08e-09	-1.30086	protein_coding	protein_coding	protein_coding,retained_intron,nonsense_mediated_decay	NA	NA	NA
ENSMUSG00000094595	Fsbp	0.00362402	-1.29733	protein_coding	protein_coding	protein_coding	NA	NA	NA
ENSMUSG00000015880	Ncapg	5.89e-07	-1.29668	protein_coding	protein_coding	protein_coding,retained_intron	NA	NA	NA
ENSMUSG00000021569	Trip13	4.75e-07	-1.29663	protein_coding	protein_coding	protein_coding	NA	NA	NA
ENSMUSG00000012443	Kif11	1.55e-09	-1.29661	protein_coding	protein_coding	protein_coding	NA	NA	NA
ENSMUSG00000039982	Dtx4	4.92e-06	-1.29517	protein_coding	protein_coding	protein_coding	NA	NA	NA
ENSMUSG00000031788	Kifc3	0.0170971	-1.29495	protein_coding	protein_coding	protein_coding,retained_intron	NA	NA	NA
ENSMUSG00000028933	Xrcc2	6.54e-05	-1.29477	protein_coding	protein_coding	protein_coding,processed_transcript,retained_intron	NA	NA	NA
ENSMUSG00000013155	Enkd1	8.44e-07	-1.29415	protein_coding	protein_coding	nonsense_mediated_decay,retained_intron,protein_coding	NA	NA	NA
ENSMUSG00000032397	Tipin	0.000125735	-1.29393	protein_coding	protein_coding	protein_coding	NA	NA	NA
ENSMUSG00000038943	Prc1	8.98e-14	-1.29276	protein_coding	protein_coding	protein_coding,retained_intron	NA	NA	NA
ENSMUSG00000000884	Gnb1l	7.62e-05	-1.29222	protein_coding	protein_coding	protein_coding,processed_transcript,nonsense_mediated_decay	NA	NA	NA
ENSMUSG00000041147	Brca2	6.5e-05	-1.29157	protein_coding	protein_coding	protein_coding,retained_intron,processed_transcript	NA	NA	NA
ENSMUSG00000037572	Wdhd1	1.09e-05	-1.28969	protein_coding	protein_coding	protein_coding,retained_intron	NA	NA	NA
ENSMUSG00000030978	Rrm1	8.38e-06	-1.28739	protein_coding	protein_coding	protein_coding,nonsense_mediated_decay,retained_intron	NA	NA	NA
ENSMUSG00000029591	Ung	2.57e-05	-1.28703	protein_coding	protein_coding	protein_coding,nonsense_mediated_decay,retained_intron	NA	NA	NA
ENSMUSG00000026657	Frmd4a	5.92e-06	-1.2838	protein_coding	protein_coding	processed_transcript,retained_intron,protein_coding,nonsense_mediated_decay	NA	NA	NA
ENSMUSG00000029177	Cenpa	1.27e-05	-1.28343	protein_coding	protein_coding	protein_coding,nonsense_mediated_decay,retained_intron	NA	NA	NA
ENSMUSG00000030641	Ddias	2.36e-05	-1.28242	protein_coding	protein_coding	protein_coding,processed_transcript	NA	NA	NA
ENSMUSG00000053219	Raet1e	0.00238406	-1.28174	protein_coding	protein_coding	protein_coding	NA	NA	NA
ENSMUSG00000033307	Mif	0.0288206	-1.28074	protein_coding	protein_coding	protein_coding	NA	NA	NA
ENSMUSG00000026483	Fam129a	0.00740727	-1.28068	protein_coding	protein_coding	protein_coding,nonsense_mediated_decay,processed_transcript	NA	NA	NA
ENSMUSG00000020914	Top2a	3.51e-05	-1.27945	protein_coding	protein_coding	protein_coding,processed_transcript	NA	NA	NA
ENSMUSG00000024972	Lgals12	0.000478576	-1.27738	protein_coding	protein_coding	protein_coding	NA	NA	NA
ENSMUSG00000027306	Nusap1	3.92e-09	-1.27557	protein_coding	protein_coding	protein_coding,processed_transcript	NA	NA	NA
ENSMUSG00000024186	Rgs11	0.0121804	-1.27526	protein_coding	protein_coding	processed_transcript,protein_coding,retained_intron	NA	NA	NA
ENSMUSG00000025395	Prim1	1.45e-06	-1.27513	protein_coding	protein_coding	protein_coding,retained_intron	NA	NA	NA
ENSMUSG00000041741	Pde3a	7.04e-11	-1.2745	protein_coding	protein_coding	protein_coding,retained_intron	NA	NA	NA
ENSMUSG00000026921	Egfl7	0.000207414	-1.27087	protein_coding	protein_coding	protein_coding,nonsense_mediated_decay,processed_transcript,retained_intron	NA	NA	NA
ENSMUSG00000063245	Zfp993	0.0401301	-1.26795	protein_coding	protein_coding	protein_coding	NA	NA	NA
ENSMUSG00000056531	Ccdc18	0.00140119	-1.26684	protein_coding	protein_coding	nonsense_mediated_decay,protein_coding,retained_intron,processed_transcript	NA	NA	NA
ENSMUSG00000074867	Zfp808	0.000932347	-1.26648	protein_coding	protein_coding	protein_coding	NA	NA	NA
ENSMUSG00000041974	Spidr	1.53e-09	-1.26588	protein_coding	protein_coding	protein_coding	NA	NA	NA
ENSMUSG00000035273	Hpse	0.00279373	-1.26557	protein_coding	protein_coding	protein_coding	NA	NA	NA
ENSMUSG00000021418	Rpp40	2.24e-07	-1.26058	protein_coding	protein_coding	protein_coding,retained_intron	NA	NA	NA
ENSMUSG00000023505	Cdca3	1.09e-08	-1.25961	protein_coding	protein_coding	protein_coding,retained_intron	NA	NA	NA
ENSMUSG00000090213	Tmem189	5.31e-08	-1.25816	protein_coding	protein_coding	protein_coding,processed_transcript,retained_intron	NA	NA	NA
ENSMUSG00000038838	Vars2	2.29e-09	-1.2564	protein_coding	protein_coding	protein_coding,retained_intron,nonsense_mediated_decay	NA	NA	NA
ENSMUSG00000049871	Nlrc3	0.0124875	-1.25561	protein_coding	protein_coding	protein_coding,retained_intron	NA	NA	NA
ENSMUSG00000034883	Lrr1	0.000538686	-1.25557	protein_coding	protein_coding	protein_coding	NA	NA	NA
ENSMUSG00000027323	Rad51	3.58e-07	-1.25369	protein_coding	protein_coding	protein_coding,retained_intron,nonsense_mediated_decay	NA	NA	NA
ENSMUSG00000039231	Suv39h1	1.51e-10	-1.25289	protein_coding	protein_coding	protein_coding,retained_intron	NA	NA	NA
ENSMUSG00000039831	Arhgap29	4.22e-07	-1.25288	protein_coding	protein_coding	protein_coding,retained_intron	NA	NA	NA
ENSMUSG00000035126	Wdr78	0.0176729	-1.25158	protein_coding	protein_coding	protein_coding,retained_intron,nonsense_mediated_decay,processed_transcript	NA	NA	NA
ENSMUSG00000031451	Gas6	0.000701711	-1.24796	protein_coding	protein_coding	protein_coding	NA	NA	NA
ENSMUSG00000047583	Tyw3	0.0134446	-1.2477	protein_coding	protein_coding	protein_coding,processed_transcript	NA	NA	NA
ENSMUSG00000030929	Eri2	1.72e-09	-1.24757	protein_coding	protein_coding	protein_coding,retained_intron,nonsense_mediated_decay	NA	NA	NA
ENSMUSG00000026955	Sapcd2	0.0018008	-1.24686	protein_coding	protein_coding	protein_coding,processed_transcript	NA	NA	NA
ENSMUSG00000054115	Skp2	4.39e-07	-1.24641	protein_coding	protein_coding	protein_coding,retained_intron,processed_transcript	NA	NA	NA
ENSMUSG00000030867	Plk1	3.39e-06	-1.24629	protein_coding	protein_coding	protein_coding,nonsense_mediated_decay	NA	NA	NA
ENSMUSG00000022369	Mtbp	0.000230789	-1.24624	protein_coding	protein_coding	protein_coding,nonsense_mediated_decay,retained_intron,processed_transcript	NA	NA	NA
ENSMUSG00000031756	Cenpn	2.15e-08	-1.24604	protein_coding	protein_coding	retained_intron,protein_coding	NA	NA	NA
ENSMUSG00000021176	Efcab11	7.14e-05	-1.24534	protein_coding	protein_coding	protein_coding	NA	NA	NA
ENSMUSG00000054920	Klhl5	1.22e-10	-1.24012	protein_coding	protein_coding	protein_coding,retained_intron,processed_transcript,nonsense_mediated_decay	NA	NA	NA
ENSMUSG00000020185	E2f7	0.000526015	-1.23987	protein_coding	protein_coding	processed_transcript,protein_coding,retained_intron,nonsense_mediated_decay	NA	NA	NA
ENSMUSG00000027469	Tpx2	1.34e-07	-1.23966	protein_coding	protein_coding	protein_coding,processed_transcript,retained_intron	NA	NA	NA
ENSMUSG00000024590	Lmnb1	1.36e-05	-1.23765	protein_coding	protein_coding	protein_coding,retained_intron	NA	NA	NA
ENSMUSG00000020592	Sdc1	0.000135818	-1.23587	protein_coding	protein_coding	protein_coding,retained_intron,processed_transcript	NA	NA	NA
ENSMUSG00000022385	Gtse1	1.24e-06	-1.23117	protein_coding	protein_coding	protein_coding	NA	NA	NA
ENSMUSG00000027298	Tyro3	0.000531513	-1.23	protein_coding	protein_coding	protein_coding,processed_transcript,retained_intron	NA	NA	NA
ENSMUSG00000008575	Nfib	1.63e-10	-1.22935	protein_coding	protein_coding	protein_coding,retained_intron,processed_transcript	NA	NA	NA
ENSMUSG00000018548	Trim37	9.47e-11	-1.22884	protein_coding	protein_coding	protein_coding,retained_intron	NA	NA	NA
ENSMUSG00000043015	Nemp2	5.72e-05	-1.22866	protein_coding	protein_coding	protein_coding,nonsense_mediated_decay,retained_intron,processed_transcript	NA	NA	NA
ENSMUSG00000028614	Ndc1	1.83e-09	-1.22755	protein_coding	protein_coding	protein_coding,nonsense_mediated_decay,processed_transcript,retained_intron	NA	NA	NA
ENSMUSG00000033031	C330027C09Rik	2.1e-08	-1.22744	protein_coding	protein_coding	protein_coding,nonsense_mediated_decay,retained_intron	NA	NA	NA
ENSMUSG00000052062	Pard3b	1.52e-08	-1.22586	protein_coding	protein_coding	protein_coding,processed_transcript,retained_intron	NA	NA	NA
ENSMUSG00000003541	Ier3	4.33e-11	-1.22462	protein_coding	protein_coding	protein_coding	NA	NA	NA
ENSMUSG00000110105	Vmn2r29	0.027944	-1.224	protein_coding	protein_coding	protein_coding,processed_transcript	NA	NA	NA
ENSMUSG00000033857	Engase	2.96e-08	-1.22325	protein_coding	protein_coding	protein_coding,nonsense_mediated_decay,retained_intron	NA	NA	NA
ENSMUSG00000026321	Tnfrsf11a	1.56e-06	-1.22246	protein_coding	protein_coding	protein_coding,retained_intron	NA	NA	NA
ENSMUSG00000027496	Aurka	6.18e-10	-1.22061	protein_coding	protein_coding	protein_coding,retained_intron	NA	NA	NA
ENSMUSG00000029246	Ppat	5.24e-06	-1.22012	protein_coding	protein_coding	nonsense_mediated_decay,protein_coding,retained_intron	NA	NA	NA
ENSMUSG00000023066	Rttn	1.87e-08	-1.21356	protein_coding	protein_coding	protein_coding	NA	NA	NA
ENSMUSG00000026017	Carf	0.00708628	-1.21339	protein_coding	protein_coding	nonsense_mediated_decay,protein_coding,retained_intron	NA	NA	NA
ENSMUSG00000069184	Zfp72	9.15e-05	-1.21297	protein_coding	protein_coding	protein_coding	NA	NA	NA
ENSMUSG00000042215	Bag2	2.94e-05	-1.21274	protein_coding	protein_coding	protein_coding,retained_intron	NA	NA	NA
ENSMUSG00000047003	Zfp41	2.77e-06	-1.21235	protein_coding	protein_coding	protein_coding,processed_transcript	NA	NA	NA
ENSMUSG00000009575	Cbx5	9.83e-13	-1.20974	protein_coding	protein_coding	protein_coding	NA	NA	NA
ENSMUSG00000027381	Bcl2l11	0.000387225	-1.20935	protein_coding	protein_coding	protein_coding,processed_transcript	NA	NA	NA
ENSMUSG00000033871	Ppargc1b	6.09e-10	-1.20921	protein_coding	protein_coding	protein_coding,processed_transcript	NA	NA	NA
ENSMUSG00000072082	Ccnf	1.25e-09	-1.20715	protein_coding	protein_coding	protein_coding	NA	NA	NA
ENSMUSG00000021831	Ero1l	0.0126697	-1.20676	protein_coding	protein_coding	protein_coding	NA	NA	NA
ENSMUSG00000022436	Sh3bp1	0.00126541	-1.20614	protein_coding	protein_coding	processed_transcript,protein_coding,nonsense_mediated_decay	NA	NA	NA
ENSMUSG00000023004	Tuba1b	6.92e-07	-1.20595	protein_coding	protein_coding	protein_coding,retained_intron	NA	NA	NA
ENSMUSG00000058216	Gstp3	0.0433696	-1.20514	protein_coding	protein_coding	protein_coding	NA	NA	NA
ENSMUSG00000021221	Dpf3	0.0283444	-1.20422	protein_coding	protein_coding	protein_coding	NA	NA	NA
ENSMUSG00000038252	Ncapd2	1.84e-05	-1.2041	protein_coding	protein_coding	protein_coding,retained_intron,nonsense_mediated_decay	NA	NA	NA
ENSMUSG00000021684	Pde8b	0.000495501	-1.20393	protein_coding	protein_coding	protein_coding,processed_transcript,retained_intron	NA	NA	NA
ENSMUSG00000001403	Ube2c	0.00314383	-1.20028	protein_coding	protein_coding	protein_coding	NA	NA	NA
ENSMUSG00000026784	Pdss1	1.37e-06	-1.19992	protein_coding	protein_coding	protein_coding,processed_transcript,nonsense_mediated_decay,retained_intron	NA	NA	NA
ENSMUSG00000041431	Ccnb1	2.41e-12	-1.19732	protein_coding	protein_coding	protein_coding,retained_intron	NA	NA	NA
ENSMUSG00000040860	Crocc	0.00325501	-1.19684	protein_coding	protein_coding	protein_coding,retained_intron	NA	NA	NA
ENSMUSG00000028066	Pmf1	0.000158905	-1.19575	protein_coding	protein_coding	protein_coding,processed_transcript,retained_intron,nonsense_mediated_decay	NA	NA	NA
ENSMUSG00000020330	Hmmr	1.7e-09	-1.19535	protein_coding	protein_coding	protein_coding,processed_transcript	NA	NA	NA
ENSMUSG00000040034	Nup43	1.06e-09	-1.19506	protein_coding	protein_coding	protein_coding,retained_intron	NA	NA	NA
ENSMUSG00000039509	Nup133	1.98e-10	-1.19478	protein_coding	protein_coding	protein_coding,processed_transcript,retained_intron	NA	NA	NA
ENSMUSG00000032409	Atr	3.85e-08	-1.19225	protein_coding	protein_coding	protein_coding,retained_intron	NA	NA	NA
ENSMUSG00000042851	Zc3h6	6.43e-07	-1.19079	protein_coding	protein_coding	protein_coding	NA	NA	NA
ENSMUSG00000020846	Rflnb	0.000460605	-1.18826	protein_coding	protein_coding	protein_coding	NA	NA	NA
ENSMUSG00000057541	Pus7	1.77e-08	-1.18773	protein_coding	protein_coding	protein_coding,processed_transcript,nonsense_mediated_decay,retained_intron	NA	NA	NA
ENSMUSG00000046711	Hmga1	1.88e-05	-1.18742	protein_coding	protein_coding	protein_coding	NA	NA	NA
ENSMUSG00000074802	Gas2l3	6.56e-11	-1.18608	protein_coding	protein_coding	protein_coding	NA	NA	NA
ENSMUSG00000019845	Tube1	0.00402471	-1.18581	protein_coding	protein_coding	retained_intron,protein_coding,nonsense_mediated_decay,processed_transcript	NA	NA	NA
ENSMUSG00000027490	E2f1	5.12e-07	-1.18496	protein_coding	protein_coding	protein_coding	NA	NA	NA
ENSMUSG00000017716	Birc5	1.6e-11	-1.18471	protein_coding	protein_coding	protein_coding	NA	NA	NA
ENSMUSG00000054321	Taf4b	8.89e-07	-1.18417	protein_coding	protein_coding	protein_coding	NA	NA	NA
ENSMUSG00000036223	Ska1	1.25e-06	-1.18396	protein_coding	protein_coding	protein_coding	NA	NA	NA
ENSMUSG00000029910	Mad2l1	1.94e-12	-1.18346	protein_coding	protein_coding	protein_coding,retained_intron,processed_transcript	NA	NA	NA
ENSMUSG00000026259	Ngef	2.15e-11	-1.17968	protein_coding	protein_coding	protein_coding,retained_intron	NA	NA	NA
ENSMUSG00000051235	Gen1	0.000284867	-1.17925	protein_coding	protein_coding	protein_coding	NA	NA	NA
ENSMUSG00000040658	Dnph1	8.92e-05	-1.17884	protein_coding	protein_coding	protein_coding	NA	NA	NA
ENSMUSG00000040918	Slc19a2	1.27e-07	-1.17795	protein_coding	protein_coding	protein_coding,retained_intron	NA	NA	NA
ENSMUSG00000028832	Stmn1	0.0039322	-1.17745	protein_coding	protein_coding	protein_coding,processed_transcript	NA	NA	NA
ENSMUSG00000024660	Incenp	3.68e-08	-1.1753	protein_coding	protein_coding	protein_coding	NA	NA	NA
ENSMUSG00000028551	Cdkn2c	2.43e-05	-1.17428	protein_coding	protein_coding	protein_coding	NA	NA	NA
ENSMUSG00000030671	Pde3b	0.00174508	-1.17416	protein_coding	protein_coding	protein_coding,retained_intron	NA	NA	NA
ENSMUSG00000045328	Cenpe	0.00047287	-1.17315	protein_coding	protein_coding	protein_coding,retained_intron	NA	NA	NA
ENSMUSG00000045932	Ifit2	0.013447	-1.1719	protein_coding	protein_coding	protein_coding	NA	NA	NA
ENSMUSG00000047757	Fancb	3.02e-06	-1.17112	protein_coding	protein_coding	protein_coding	NA	NA	NA
ENSMUSG00000034349	Smc4	1.13e-08	-1.1708	protein_coding	protein_coding	protein_coding,nonsense_mediated_decay,retained_intron,processed_transcript	NA	NA	NA
ENSMUSG00000025019	Lcor	0.0188693	-1.17004	protein_coding	protein_coding	protein_coding	NA	NA	NA
ENSMUSG00000034311	Kif4	3.63e-05	-1.16925	protein_coding	protein_coding	protein_coding,retained_intron,processed_transcript	NA	NA	NA
ENSMUSG00000000751	Rpa1	1.1e-11	-1.16693	protein_coding	protein_coding	protein_coding,processed_transcript,retained_intron	NA	NA	NA
ENSMUSG00000003779	Kif20a	6.79e-09	-1.16593	protein_coding	protein_coding	protein_coding	NA	NA	NA
ENSMUSG00000028572	Hook1	8.15e-06	-1.16494	protein_coding	protein_coding	protein_coding,processed_transcript	NA	NA	NA
ENSMUSG00000027605	Acss2	0.00816499	-1.16421	protein_coding	protein_coding	protein_coding,retained_intron,nonsense_mediated_decay,processed_transcript	NA	NA	NA
ENSMUSG00000021830	Txndc16	0.00900239	-1.16351	protein_coding	protein_coding	protein_coding,retained_intron,processed_transcript	NA	NA	NA
ENSMUSG00000007379	Dennd2c	0.000572612	-1.16222	protein_coding	protein_coding	protein_coding,retained_intron,processed_transcript	NA	NA	NA
ENSMUSG00000037820	Tgm2	3.51e-09	-1.16113	protein_coding	protein_coding	protein_coding,nonsense_mediated_decay,retained_intron,processed_transcript	NA	NA	NA
ENSMUSG00000038241	Cep250	2.32e-08	-1.15878	protein_coding	protein_coding	retained_intron,protein_coding,nonsense_mediated_decay	NA	NA	NA
ENSMUSG00000027654	Fam83d	1.83e-09	-1.15868	protein_coding	protein_coding	protein_coding,retained_intron	NA	NA	NA
ENSMUSG00000042404	Dennd4b	0.00428071	-1.15812	protein_coding	protein_coding	protein_coding,nonsense_mediated_decay,retained_intron	NA	NA	NA
ENSMUSG00000075502	Kbtbd6	0.00201842	-1.15682	protein_coding	protein_coding	protein_coding	NA	NA	NA
ENSMUSG00000033970	Rfc3	2.22e-08	-1.15477	protein_coding	protein_coding	protein_coding,retained_intron	NA	NA	NA
ENSMUSG00000043154	Ppp2r3a	0.0058168	-1.15449	protein_coding	protein_coding	protein_coding,processed_transcript,retained_intron	NA	NA	NA
ENSMUSG00000039145	Camk1d	1.49e-10	-1.1544	protein_coding	protein_coding	protein_coding,processed_transcript	NA	NA	NA
ENSMUSG00000040204	2810417H13Rik	0.00027227	-1.15146	protein_coding	protein_coding	protein_coding,retained_intron	NA	NA	NA
ENSMUSG00000023008	Fmnl3	0.000551655	-1.15069	protein_coding	protein_coding	protein_coding,retained_intron,processed_transcript	NA	NA	NA
ENSMUSG00000059939	9430015G10Rik	2.18e-06	-1.15008	protein_coding	protein_coding	protein_coding,processed_transcript	NA	NA	NA
ENSMUSG00000031403	Dkc1	4.63e-07	-1.14876	protein_coding	protein_coding	protein_coding,retained_intron,processed_transcript,nonsense_mediated_decay	NA	NA	NA
ENSMUSG00000031557	Plekha2	0.00173421	-1.14829	protein_coding	protein_coding	protein_coding,processed_transcript	NA	NA	NA
ENSMUSG00000006398	Cdc20	4.21e-06	-1.14761	protein_coding	protein_coding	protein_coding,nonsense_mediated_decay,retained_intron	NA	NA	NA
ENSMUSG00000098132	Rassf10	0.00770343	-1.1476	protein_coding	protein_coding	protein_coding	NA	NA	NA
ENSMUSG00000061718	Ppp1r1b	2.76e-06	-1.14725	protein_coding	protein_coding	protein_coding,retained_intron,processed_transcript	NA	NA	NA
ENSMUSG00000051444	Bbs12	0.0094792	-1.14629	protein_coding	protein_coding	protein_coding	NA	NA	NA
ENSMUSG00000058392	Rrp1b	3.25e-05	-1.14499	protein_coding	protein_coding	protein_coding,retained_intron,nonsense_mediated_decay,processed_transcript	NA	NA	NA
ENSMUSG00000029363	Rfc5	2.12e-08	-1.14474	protein_coding	protein_coding	protein_coding,retained_intron	NA	NA	NA
ENSMUSG00000028457	Atp8b5	0.00513843	-1.14358	protein_coding	protein_coding	retained_intron,protein_coding,nonsense_mediated_decay	NA	NA	NA
ENSMUSG00000036109	Mbnl3	0.00498842	-1.14335	protein_coding	protein_coding	protein_coding,retained_intron,processed_transcript	NA	NA	NA
ENSMUSG00000047230	Cldn2	1.95e-11	-1.14138	protein_coding	protein_coding	protein_coding	NA	NA	NA
ENSMUSG00000031626	Sorbs2	0.000368097	-1.14028	protein_coding	protein_coding	protein_coding,retained_intron,processed_transcript,nonsense_mediated_decay	NA	NA	NA
ENSMUSG00000054717	Hmgb2	0.0008688	-1.13945	protein_coding	protein_coding	protein_coding,processed_transcript	NA	NA	NA
ENSMUSG00000002297	Dbf4	2.43e-11	-1.13828	protein_coding	protein_coding	protein_coding,retained_intron,processed_transcript	NA	NA	NA
ENSMUSG00000035561	Aldh1b1	2.41e-09	-1.13823	protein_coding	protein_coding	protein_coding	NA	NA	NA
ENSMUSG00000076437	Selenoh	0.00660298	-1.13654	protein_coding	protein_coding	protein_coding,retained_intron	NA	NA	NA
ENSMUSG00000019813	Cep57l1	1.4e-05	-1.13442	protein_coding	protein_coding	protein_coding,retained_intron,processed_transcript	NA	NA	NA
ENSMUSG00000025026	Add3	1.24e-10	-1.13241	protein_coding	protein_coding	protein_coding	NA	NA	NA
ENSMUSG00000024691	Fam111a	5.03e-06	-1.13137	protein_coding	protein_coding	processed_transcript,protein_coding	NA	NA	NA
ENSMUSG00000020471	Pold2	8.05e-06	-1.12944	protein_coding	protein_coding	protein_coding,retained_intron,processed_transcript	NA	NA	NA
ENSMUSG00000025507	Pidd1	0.00114052	-1.12874	protein_coding	protein_coding	protein_coding,nonsense_mediated_decay,retained_intron,processed_transcript	NA	NA	NA
ENSMUSG00000070348	Ccnd1	4.93e-06	-1.12854	protein_coding	protein_coding	protein_coding,retained_intron	NA	NA	NA
ENSMUSG00000047749	Zc3hav1l	0.0247128	-1.12777	protein_coding	protein_coding	protein_coding	NA	NA	NA
ENSMUSG00000024978	Gpam	3.75e-11	-1.12732	protein_coding	protein_coding	protein_coding	NA	NA	NA
ENSMUSG00000039055	Eme1	0.000669363	-1.12677	protein_coding	protein_coding	protein_coding,processed_transcript	NA	NA	NA
ENSMUSG00000028633	Ctps	7.15e-09	-1.12614	protein_coding	protein_coding	protein_coding,processed_transcript	NA	NA	NA
ENSMUSG00000038578	Susd1	2.06e-06	-1.12582	protein_coding	protein_coding	protein_coding,retained_intron	NA	NA	NA
ENSMUSG00000045817	Zfp36l2	0.0093335	-1.12552	protein_coding	protein_coding	protein_coding	NA	NA	NA
ENSMUSG00000050520	Cldn8	0.0118728	-1.12505	protein_coding	protein_coding	protein_coding	NA	NA	NA
ENSMUSG00000029247	Paics	1.19e-05	-1.12499	protein_coding	protein_coding	protein_coding,nonsense_mediated_decay,retained_intron	NA	NA	NA
ENSMUSG00000026134	Prim2	1.67e-05	-1.12495	protein_coding	protein_coding	protein_coding,retained_intron	NA	NA	NA
ENSMUSG00000020381	3010026O09Rik	4.34e-05	-1.12385	protein_coding	protein_coding	processed_transcript,protein_coding,nonsense_mediated_decay	NA	NA	NA
ENSMUSG00000036022	Fam122b	4.8e-08	-1.12345	protein_coding	protein_coding	protein_coding,processed_transcript	NA	NA	NA
ENSMUSG00000025742	Prps2	5.9e-11	-1.12242	protein_coding	protein_coding	protein_coding,processed_transcript	NA	NA	NA
ENSMUSG00000030199	Etv6	1.46e-06	-1.12027	protein_coding	protein_coding	protein_coding,retained_intron,processed_transcript	NA	NA	NA
ENSMUSG00000090115	Usp49	6.83e-05	-1.12024	protein_coding	protein_coding	protein_coding,nonsense_mediated_decay	NA	NA	NA
ENSMUSG00000033278	Ptprm	0.00784058	-1.11899	protein_coding	protein_coding	protein_coding	NA	NA	NA
ENSMUSG00000017009	Sdc4	1.7e-06	-1.11705	protein_coding	protein_coding	protein_coding,processed_transcript	NA	NA	NA
ENSMUSG00000029596	Sdsl	0.000399258	-1.11694	protein_coding	protein_coding	protein_coding	NA	NA	NA
ENSMUSG00000021048	Mthfd1	9.46e-11	-1.11626	protein_coding	protein_coding	protein_coding	NA	NA	NA
ENSMUSG00000027860	Vangl1	4.14e-05	-1.11597	protein_coding	protein_coding	protein_coding,retained_intron,processed_transcript	NA	NA	NA
ENSMUSG00000028884	Rpa2	4.75e-06	-1.1149	protein_coding	protein_coding	processed_transcript,protein_coding,retained_intron	NA	NA	NA
ENSMUSG00000028693	Nasp	1.54e-06	-1.11327	protein_coding	protein_coding	protein_coding,processed_transcript	NA	NA	NA
ENSMUSG00000036327	Qsox2	5.11e-07	-1.11151	protein_coding	protein_coding	protein_coding	NA	NA	NA
ENSMUSG00000078185	Chml	2.13e-06	-1.10991	protein_coding	protein_coding	protein_coding	NA	NA	NA
ENSMUSG00000001525	Tubb5	3.24e-05	-1.10984	protein_coding	protein_coding	protein_coding,retained_intron	NA	NA	NA
ENSMUSG00000047221	Fam185a	1.34e-06	-1.10933	protein_coding	protein_coding	protein_coding,retained_intron,processed_transcript	NA	NA	NA
ENSMUSG00000030303	Far2	5.59e-09	-1.10878	protein_coding	protein_coding	protein_coding,retained_intron	NA	NA	NA
ENSMUSG00000022962	Gart	2.91e-10	-1.1082	protein_coding	protein_coding	protein_coding,nonsense_mediated_decay	NA	NA	NA
ENSMUSG00000024177	Nme4	0.0025661	-1.10653	protein_coding	protein_coding	protein_coding,retained_intron	NA	NA	NA
ENSMUSG00000055485	Soga1	0.0144784	-1.10587	protein_coding	protein_coding	protein_coding,processed_transcript	NA	NA	NA
ENSMUSG00000062248	Cks2	9.24e-06	-1.10443	protein_coding	protein_coding	protein_coding	NA	NA	NA
ENSMUSG00000014444	Piezo1	1.46e-07	-1.10391	protein_coding	protein_coding	protein_coding,retained_intron,nonsense_mediated_decay	NA	NA	NA
ENSMUSG00000024613	Tcof1	3.65e-10	-1.10216	protein_coding	protein_coding	protein_coding,nonsense_mediated_decay,retained_intron	NA	NA	NA
ENSMUSG00000021391	Cenpp	0.00142757	-1.10185	protein_coding	protein_coding	protein_coding	NA	NA	NA
ENSMUSG00000053931	Cnn3	0.000243744	-1.10107	protein_coding	protein_coding	protein_coding,retained_intron,processed_transcript	NA	NA	NA
ENSMUSG00000071856	Mcc	0.00377675	-1.10065	protein_coding	protein_coding	protein_coding,retained_intron,processed_transcript	NA	NA	NA
ENSMUSG00000032860	P2ry2	0.0143274	-1.10049	protein_coding	protein_coding	protein_coding,retained_intron	NA	NA	NA
ENSMUSG00000047044	D030056L22Rik	0.000461913	-1.09855	protein_coding	protein_coding	protein_coding	NA	NA	NA
ENSMUSG00000014786	Slc9a5	0.000990964	-1.0975	protein_coding	protein_coding	protein_coding,retained_intron	NA	NA	NA
ENSMUSG00000028040	Efna4	0.00296653	-1.09726	protein_coding	protein_coding	protein_coding	NA	NA	NA
ENSMUSG00000055629	B4galnt4	8.56e-05	-1.09425	protein_coding	protein_coding	protein_coding,retained_intron	NA	NA	NA
ENSMUSG00000031669	Gins3	0.000279145	-1.09229	protein_coding	protein_coding	protein_coding	NA	NA	NA
ENSMUSG00000058799	Nap1l1	3.92e-05	-1.09215	protein_coding	protein_coding	protein_coding	NA	NA	NA
ENSMUSG00000033826	Dnah8	0.00162081	-1.09089	protein_coding	protein_coding	protein_coding	NA	NA	NA
ENSMUSG00000032586	Traip	0.000325911	-1.09078	protein_coding	protein_coding	retained_intron,protein_coding,processed_transcript	NA	NA	NA
ENSMUSG00000036805	Noxa1	0.00680777	-1.08956	protein_coding	protein_coding	protein_coding	NA	NA	NA
ENSMUSG00000028532	Cachd1	0.0129671	-1.08842	protein_coding	protein_coding	protein_coding,processed_transcript	NA	NA	NA
ENSMUSG00000040195	Nemp1	0.000108646	-1.08799	protein_coding	protein_coding	processed_transcript,protein_coding	NA	NA	NA
ENSMUSG00000042606	Hirip3	3.93e-05	-1.08784	protein_coding	protein_coding	protein_coding,retained_intron,processed_transcript	NA	NA	NA
ENSMUSG00000023908	Pkmyt1	0.00722703	-1.08744	protein_coding	protein_coding	protein_coding	NA	NA	NA
ENSMUSG00000021811	Dnajc9	0.000674688	-1.08721	protein_coding	protein_coding	protein_coding	NA	NA	NA
ENSMUSG00000030029	Lrig1	1.76e-08	-1.08678	protein_coding	protein_coding	nonsense_mediated_decay,protein_coding,processed_transcript	NA	NA	NA
ENSMUSG00000066438	Plekhd1	0.00239217	-1.08473	protein_coding	protein_coding	protein_coding,processed_transcript,nonsense_mediated_decay,retained_intron	NA	NA	NA
ENSMUSG00000028573	Fggy	0.0392793	-1.08421	protein_coding	protein_coding	protein_coding,processed_transcript,nonsense_mediated_decay	NA	NA	NA
ENSMUSG00000027684	Mecom	0.0227104	-1.08394	protein_coding	protein_coding	protein_coding,nonsense_mediated_decay,processed_transcript,retained_intron	NA	NA	NA
ENSMUSG00000020937	Plcd3	0.00614103	-1.08322	protein_coding	protein_coding	protein_coding,processed_transcript	NA	NA	NA
ENSMUSG00000055493	Epm2a	0.00202384	-1.08224	protein_coding	protein_coding	protein_coding,processed_transcript	NA	NA	NA
ENSMUSG00000037419	Endod1	7.06e-08	-1.08151	protein_coding	protein_coding	protein_coding,processed_transcript	NA	NA	NA
ENSMUSG00000000594	Gm2a	0.000927516	-1.08126	protein_coding	protein_coding	protein_coding	NA	NA	NA
ENSMUSG00000027641	Rbl1	1.09e-09	-1.07847	protein_coding	protein_coding	protein_coding,retained_intron	NA	NA	NA
ENSMUSG00000026398	Nr5a2	4.69e-07	-1.0777	protein_coding	protein_coding	protein_coding,retained_intron	NA	NA	NA
ENSMUSG00000025403	Shmt2	4.72e-05	-1.07684	protein_coding	protein_coding	protein_coding	NA	NA	NA
ENSMUSG00000005370	Msh6	2.04e-10	-1.07629	protein_coding	protein_coding	protein_coding	NA	NA	NA
ENSMUSG00000037628	Cdkn3	6.2e-08	-1.07569	protein_coding	protein_coding	protein_coding	NA	NA	NA
ENSMUSG00000069910	Spdl1	6.54e-06	-1.07542	protein_coding	protein_coding	protein_coding,retained_intron	NA	NA	NA
ENSMUSG00000050410	Tcf19	0.00103926	-1.07466	protein_coding	protein_coding	protein_coding	NA	NA	NA
ENSMUSG00000028282	Casp8ap2	0.00837797	-1.07463	protein_coding	protein_coding	processed_transcript,protein_coding	NA	NA	NA
ENSMUSG00000000555	Itga5	0.000124081	-1.07454	protein_coding	protein_coding	protein_coding,nonsense_mediated_decay	NA	NA	NA
ENSMUSG00000030722	Nfatc2ip	1.22e-05	-1.07318	protein_coding	protein_coding	protein_coding	NA	NA	NA
ENSMUSG00000024431	Nr3c1	4.8e-10	-1.0728	protein_coding	protein_coding	protein_coding	NA	NA	NA
ENSMUSG00000022253	Nadk2	8.66e-08	-1.07095	protein_coding	protein_coding	protein_coding,processed_transcript,retained_intron	NA	NA	NA
ENSMUSG00000036304	Zdhhc23	5.57e-05	-1.07004	protein_coding	protein_coding	protein_coding	NA	NA	NA
ENSMUSG00000022748	Cmss1	7.39e-07	-1.07002	protein_coding	protein_coding	protein_coding	NA	NA	NA
ENSMUSG00000027763	Mbnl1	4.51e-09	-1.06822	protein_coding	protein_coding	protein_coding,retained_intron,processed_transcript	NA	NA	NA
ENSMUSG00000022346	Myc	0.00163823	-1.06805	protein_coding	protein_coding	protein_coding	NA	NA	NA
ENSMUSG00000037544	Dlgap5	8.89e-06	-1.06716	protein_coding	protein_coding	protein_coding,retained_intron,processed_transcript	NA	NA	NA
ENSMUSG00000031987	Egln1	0.000199162	-1.06472	protein_coding	protein_coding	protein_coding	NA	NA	NA
ENSMUSG00000024791	Cdca5	1.02e-06	-1.06435	protein_coding	protein_coding	protein_coding,processed_transcript	NA	NA	NA
ENSMUSG00000025271	Pfkfb1	0.000325911	-1.06348	protein_coding	protein_coding	protein_coding,processed_transcript,retained_intron	NA	NA	NA
ENSMUSG00000032902	Slc16a1	2.11e-05	-1.06348	protein_coding	protein_coding	protein_coding	NA	NA	NA
ENSMUSG00000022489	Pde1b	0.000575907	-1.0621	protein_coding	protein_coding	protein_coding	NA	NA	NA
ENSMUSG00000030513	Pcsk6	0.000325632	-1.06082	protein_coding	protein_coding	protein_coding,retained_intron	NA	NA	NA
ENSMUSG00000022978	Mis18a	0.000287	-1.06024	protein_coding	protein_coding	protein_coding,retained_intron	NA	NA	NA
ENSMUSG00000030677	Kif22	1.77e-05	-1.05952	protein_coding	protein_coding	protein_coding,retained_intron	NA	NA	NA
ENSMUSG00000020648	Dus4l	6.4e-07	-1.05936	protein_coding	protein_coding	protein_coding	NA	NA	NA
ENSMUSG00000006715	Gmnn	4.9e-07	-1.05891	protein_coding	protein_coding	protein_coding,nonsense_mediated_decay	NA	NA	NA
ENSMUSG00000036523	Greb1	0.00218425	-1.05842	protein_coding	protein_coding	protein_coding,retained_intron,nonsense_mediated_decay	NA	NA	NA
ENSMUSG00000039765	Cc2d2a	4.61e-06	-1.05838	protein_coding	protein_coding	protein_coding,retained_intron	NA	NA	NA
ENSMUSG00000063810	Alms1	0.000868709	-1.05803	protein_coding	protein_coding	protein_coding,retained_intron	NA	NA	NA
ENSMUSG00000030946	Lhpp	0.0042085	-1.05801	protein_coding	protein_coding	nonsense_mediated_decay,protein_coding,processed_transcript,retained_intron	NA	NA	NA
ENSMUSG00000033222	Ttf2	1.8e-05	-1.05703	protein_coding	protein_coding	protein_coding,retained_intron	NA	NA	NA
ENSMUSG00000032076	Cadm1	0.0229496	-1.05698	protein_coding	protein_coding	protein_coding,retained_intron,processed_transcript	NA	NA	NA
ENSMUSG00000031355	Arhgap6	0.0010784	-1.0569	protein_coding	protein_coding	protein_coding,nonsense_mediated_decay,retained_intron	NA	NA	NA
ENSMUSG00000024056	Ndc80	0.000281268	-1.05644	protein_coding	protein_coding	protein_coding	NA	NA	NA
ENSMUSG00000034528	Hsd17b13	0.0296243	-1.05588	protein_coding	protein_coding	protein_coding	NA	NA	NA
ENSMUSG00000044066	Cep68	7.26e-09	-1.05559	protein_coding	protein_coding	protein_coding,retained_intron	NA	NA	NA
ENSMUSG00000020131	Pcsk4	0.00283478	-1.05427	protein_coding	protein_coding	protein_coding,nonsense_mediated_decay,retained_intron	NA	NA	NA
ENSMUSG00000055296	Tmem245	1.31e-05	-1.05395	protein_coding	protein_coding	protein_coding,processed_transcript	NA	NA	NA
ENSMUSG00000057406	Whsc1	1.34e-07	-1.05384	protein_coding	protein_coding	protein_coding,nonsense_mediated_decay,retained_intron	NA	NA	NA
ENSMUSG00000024151	Msh2	2.44e-05	-1.05332	protein_coding	protein_coding	protein_coding,retained_intron,nonsense_mediated_decay	NA	NA	NA
ENSMUSG00000041168	Lonp1	0.0013092	-1.05297	protein_coding	protein_coding	protein_coding	NA	NA	NA
ENSMUSG00000046589	Lrrc8e	0.0478023	-1.05229	protein_coding	protein_coding	protein_coding	NA	NA	NA
ENSMUSG00000037216	Lipt1	0.00930222	-1.04975	protein_coding	protein_coding	protein_coding	NA	NA	NA
ENSMUSG00000034177	Rnf43	1.02e-06	-1.04605	protein_coding	protein_coding	retained_intron,protein_coding,processed_transcript	NA	NA	NA
ENSMUSG00000024074	Crim1	1.11e-09	-1.04583	protein_coding	protein_coding	protein_coding	NA	NA	NA
ENSMUSG00000062867	Impdh2	9.06e-09	-1.04568	protein_coding	protein_coding	protein_coding,retained_intron	NA	NA	NA
ENSMUSG00000025602	Zfp202	0.0074709	-1.04462	protein_coding	protein_coding	nonsense_mediated_decay,protein_coding	NA	NA	NA
ENSMUSG00000027342	Pcna	1.05e-09	-1.04427	protein_coding	protein_coding	protein_coding,retained_intron,processed_transcript	NA	NA	NA
ENSMUSG00000049907	Rasl11b	0.0284062	-1.03933	protein_coding	protein_coding	protein_coding,retained_intron	NA	NA	NA
ENSMUSG00000035351	Nup37	7.65e-06	-1.03874	protein_coding	protein_coding	protein_coding	NA	NA	NA
ENSMUSG00000022881	Rfc4	2.07e-07	-1.03784	protein_coding	protein_coding	protein_coding,retained_intron,nonsense_mediated_decay	NA	NA	NA
ENSMUSG00000046352	Gjb2	2.1e-09	-1.03661	protein_coding	protein_coding	protein_coding	NA	NA	NA
ENSMUSG00000022003	Slc25a30	3.73e-05	-1.0343	protein_coding	protein_coding	protein_coding	NA	NA	NA
ENSMUSG00000031173	Otc	9.43e-08	-1.03384	protein_coding	protein_coding	protein_coding	NA	NA	NA
ENSMUSG00000021952	Xpo4	3.33e-06	-1.0327	protein_coding	protein_coding	protein_coding,nonsense_mediated_decay,processed_transcript,retained_intron	NA	NA	NA
ENSMUSG00000022479	Vdr	2.54e-05	-1.03154	protein_coding	protein_coding	protein_coding,retained_intron	NA	NA	NA
ENSMUSG00000021115	Vrk1	6.13e-08	-1.03083	protein_coding	protein_coding	protein_coding	NA	NA	NA
ENSMUSG00000032289	Thsd4	5.09e-05	-1.02913	protein_coding	protein_coding	protein_coding,retained_intron,processed_transcript	NA	NA	NA
ENSMUSG00000035439	Haus8	0.000219404	-1.02809	protein_coding	protein_coding	nonsense_mediated_decay,protein_coding,processed_transcript,retained_intron	NA	NA	NA
ENSMUSG00000025747	Tyms	2.06e-05	-1.0277	protein_coding	protein_coding	nonsense_mediated_decay,protein_coding,retained_intron,processed_transcript	NA	NA	NA
ENSMUSG00000049313	Sorl1	0.000189477	-1.02688	protein_coding	protein_coding	protein_coding,retained_intron,processed_transcript	NA	NA	NA
ENSMUSG00000026281	Dtymk	0.00286991	-1.0259	protein_coding	protein_coding	protein_coding,processed_transcript	NA	NA	NA
ENSMUSG00000028560	Usp1	4.64e-06	-1.02524	protein_coding	protein_coding	protein_coding	NA	NA	NA
ENSMUSG00000038005	Hpf1	1.63e-07	-1.02259	protein_coding	protein_coding	protein_coding,nonsense_mediated_decay,retained_intron	NA	NA	NA
ENSMUSG00000032558	Nphp3	0.0157798	-1.02086	protein_coding	protein_coding	retained_intron,protein_coding,nonsense_mediated_decay	NA	NA	NA
ENSMUSG00000037643	Prkci	3.85e-07	-1.02086	protein_coding	protein_coding	protein_coding,processed_transcript,retained_intron	NA	NA	NA
ENSMUSG00000041688	Amot	1.75e-05	-1.02058	protein_coding	protein_coding	protein_coding,retained_intron	NA	NA	NA
ENSMUSG00000062070	Pgk1	0.0188334	-1.02047	protein_coding	protein_coding	protein_coding,nonsense_mediated_decay,retained_intron	NA	NA	NA
ENSMUSG00000020472	Zkscan17	2.97e-06	-1.0194	protein_coding	protein_coding	protein_coding,processed_transcript	NA	NA	NA
ENSMUSG00000020424	Gatsl3	0.0162635	-1.0174	protein_coding	protein_coding	protein_coding	NA	NA	NA
ENSMUSG00000028403	Zdhhc21	0.00231528	-1.01652	protein_coding	protein_coding	protein_coding,nonsense_mediated_decay,retained_intron	NA	NA	NA
ENSMUSG00000021509	Slc25a48	0.0350483	-1.01612	protein_coding	protein_coding	protein_coding	NA	NA	NA
ENSMUSG00000027420	Bfsp1	0.00440273	-1.01531	protein_coding	protein_coding	protein_coding	NA	NA	NA
ENSMUSG00000042462	Dctpp1	1.69e-06	-1.01453	protein_coding	protein_coding	protein_coding	NA	NA	NA
ENSMUSG00000005533	Igf1r	0.00206692	-1.01426	protein_coding	protein_coding	protein_coding,retained_intron	NA	NA	NA
ENSMUSG00000041995	Zbed3	4.05e-06	-1.01406	protein_coding	protein_coding	protein_coding	NA	NA	NA
ENSMUSG00000026565	Pou2f1	0.00609893	-1.01392	protein_coding	protein_coding	protein_coding,retained_intron	NA	NA	NA
ENSMUSG00000071547	Nt5dc2	2.83e-05	-1.01378	protein_coding	protein_coding	protein_coding	NA	NA	NA
ENSMUSG00000044340	Phlpp1	0.0016155	-1.01373	protein_coding	protein_coding	protein_coding,retained_intron,processed_transcript	NA	NA	NA
ENSMUSG00000020741	Cluh	5.82e-09	-1.0135	protein_coding	protein_coding	processed_transcript,protein_coding,retained_intron	NA	NA	NA
ENSMUSG00000037275	Gemin5	3.5e-09	-1.01252	protein_coding	protein_coding	protein_coding,processed_transcript	NA	NA	NA
ENSMUSG00000032254	Kif23	1.34e-06	-1.01248	protein_coding	protein_coding	processed_transcript,protein_coding,retained_intron	NA	NA	NA
ENSMUSG00000025464	Paox	0.0011477	-1.0119	protein_coding	protein_coding	protein_coding,nonsense_mediated_decay,processed_transcript	NA	NA	NA
ENSMUSG00000020256	Aldh1l2	9.4e-05	-1.01135	protein_coding	protein_coding	protein_coding,processed_transcript,retained_intron	NA	NA	NA
ENSMUSG00000038126	Mphosph9	0.00280146	-1.01054	protein_coding	protein_coding	protein_coding,nonsense_mediated_decay,processed_transcript,retained_intron	NA	NA	NA
ENSMUSG00000039200	Atf7ip2	0.0412936	-1.01014	protein_coding	protein_coding	protein_coding,retained_intron	NA	NA	NA
ENSMUSG00000020814	Mxra7	0.0466627	-1.01009	protein_coding	protein_coding	protein_coding,nonsense_mediated_decay	NA	NA	NA
ENSMUSG00000037313	Tacc3	1.52e-08	-1.00874	protein_coding	protein_coding	protein_coding,retained_intron	NA	NA	NA
ENSMUSG00000028018	Gstcd	9.33e-07	-1.00823	protein_coding	protein_coding	protein_coding,retained_intron,processed_transcript	NA	NA	NA
ENSMUSG00000012350	Ehf	0.000558782	-1.00772	protein_coding	protein_coding	protein_coding,retained_intron	NA	NA	NA
ENSMUSG00000090626	Tex9	0.0332285	-1.00732	protein_coding	protein_coding	nonsense_mediated_decay,protein_coding,retained_intron,processed_transcript	NA	NA	NA
ENSMUSG00000033411	Ctdspl2	7.46e-08	-1.00687	protein_coding	protein_coding	protein_coding,retained_intron,processed_transcript	NA	NA	NA
ENSMUSG00000006587	Snai3	0.00174508	-1.00679	protein_coding	protein_coding	protein_coding	NA	NA	NA
ENSMUSG00000031730	Dhodh	1.6e-05	-1.00587	protein_coding	protein_coding	nonsense_mediated_decay,processed_transcript,protein_coding,retained_intron	NA	NA	NA
ENSMUSG00000026558	Uck2	1.14e-08	-1.00579	protein_coding	protein_coding	protein_coding,nonsense_mediated_decay,processed_transcript	NA	NA	NA
ENSMUSG00000058006	Mdn1	0.00176701	-1.00561	protein_coding	protein_coding	protein_coding,processed_transcript	NA	NA	NA
ENSMUSG00000044201	Cdc25c	1.51e-06	-1.00495	protein_coding	protein_coding	protein_coding	NA	NA	NA
ENSMUSG00000034317	Trim59	0.00516829	-1.00485	protein_coding	protein_coding	protein_coding,retained_intron,processed_transcript	NA	NA	NA
ENSMUSG00000064090	Vrk2	0.000100694	-1.00317	protein_coding	protein_coding	protein_coding,retained_intron,processed_transcript	NA	NA	NA
ENSMUSG00000095567	Noc2l	6.59e-08	-1.00111	protein_coding	protein_coding	protein_coding	NA	NA	NA
ENSMUSG00000101031	Ms4a12	3.33e-06	1.00061	protein_coding	protein_coding	protein_coding	NA	NA	NA
ENSMUSG00000071203	Naip5	4.32e-09	1.00101	protein_coding	protein_coding	protein_coding	NA	NA	NA
ENSMUSG00000047473	Zfp30	0.0143274	1.00329	protein_coding	protein_coding	protein_coding,retained_intron	NA	NA	NA
ENSMUSG00000017466	Timp2	0.0335126	1.0034	protein_coding	protein_coding	protein_coding	NA	NA	NA
ENSMUSG00000030275	Etnk1	1.02e-06	1.00458	protein_coding	protein_coding	protein_coding,retained_intron	NA	NA	NA
ENSMUSG00000045871	Slitrk6	0.0220512	1.00525	protein_coding	protein_coding	protein_coding	NA	NA	NA
ENSMUSG00000019761	Krt10	0.00359113	1.00539	protein_coding	protein_coding	protein_coding	NA	NA	NA
ENSMUSG00000026131	Dst	0.00112034	1.00583	protein_coding	protein_coding	protein_coding,retained_intron,processed_transcript	NA	NA	NA
ENSMUSG00000039461	Tcta	2.38e-06	1.00748	protein_coding	protein_coding	protein_coding	NA	NA	NA
ENSMUSG00000027346	Gpcpd1	3.9e-07	1.00857	protein_coding	protein_coding	protein_coding,retained_intron,nonsense_mediated_decay,processed_transcript	NA	NA	NA
ENSMUSG00000073889	Il11ra1	2.67e-05	1.00874	protein_coding	protein_coding	protein_coding,retained_intron	NA	NA	NA
ENSMUSG00000019302	Atp6v0a1	0.000145865	1.0095	protein_coding	protein_coding	protein_coding,processed_transcript	NA	NA	NA
ENSMUSG00000027808	Serp1	1.27e-07	1.01117	protein_coding	protein_coding	protein_coding	NA	NA	NA
ENSMUSG00000036989	Trim3	6.15e-05	1.01269	protein_coding	protein_coding	protein_coding,retained_intron,processed_transcript	NA	NA	NA
ENSMUSG00000028737	Aldh4a1	5.07e-07	1.01301	protein_coding	protein_coding	protein_coding,processed_transcript	NA	NA	NA
ENSMUSG00000040462	Os9	1.8e-08	1.01363	protein_coding	protein_coding	protein_coding	NA	NA	NA
ENSMUSG00000032417	Rwdd2a	0.00571614	1.01389	protein_coding	protein_coding	protein_coding	NA	NA	NA
ENSMUSG00000110206	Flt3l	0.0189114	1.01437	protein_coding	protein_coding	processed_transcript,nonsense_mediated_decay,protein_coding,retained_intron	NA	NA	NA
ENSMUSG00000024777	Ppp2r5b	5.47e-05	1.01453	protein_coding	protein_coding	protein_coding,retained_intron,processed_transcript	NA	NA	NA
ENSMUSG00000032489	Kif9	0.0432351	1.01507	protein_coding	protein_coding	protein_coding	NA	NA	NA
ENSMUSG00000038039	Gcc2	8.01e-08	1.01524	protein_coding	protein_coding	protein_coding,nonsense_mediated_decay,processed_transcript,retained_intron	NA	NA	NA
ENSMUSG00000030287	Itpr2	0.00325845	1.01536	protein_coding	protein_coding	protein_coding,processed_transcript,retained_intron,nonsense_mediated_decay	NA	NA	NA
ENSMUSG00000053137	Mapk11	0.000920886	1.01628	protein_coding	protein_coding	protein_coding	NA	NA	NA
ENSMUSG00000027822	Slc33a1	3.03e-09	1.01705	protein_coding	protein_coding	protein_coding	NA	NA	NA
ENSMUSG00000042712	Wbp5	0.0053526	1.01711	protein_coding	protein_coding	protein_coding	NA	NA	NA
ENSMUSG00000031778	Cx3cl1	3.23e-05	1.01863	protein_coding	protein_coding	protein_coding,nonsense_mediated_decay,processed_transcript	NA	NA	NA
ENSMUSG00000028019	Pdgfc	0.0214779	1.02198	protein_coding	protein_coding	protein_coding,nonsense_mediated_decay	NA	NA	NA
ENSMUSG00000038648	Creb3l2	0.000180863	1.02199	protein_coding	protein_coding	protein_coding,processed_transcript	NA	NA	NA
ENSMUSG00000021136	Smoc1	0.00161957	1.02298	protein_coding	protein_coding	protein_coding	NA	NA	NA
ENSMUSG00000024423	Impact	0.000633565	1.02337	protein_coding	protein_coding	protein_coding	NA	NA	NA
ENSMUSG00000052331	Ankrd44	0.000378851	1.02484	protein_coding	protein_coding	protein_coding,retained_intron,processed_transcript	NA	NA	NA
ENSMUSG00000019188	H13	1.78e-09	1.02556	protein_coding	protein_coding	protein_coding,retained_intron	NA	NA	NA
ENSMUSG00000056724	Nbeal2	2.39e-06	1.02662	protein_coding	protein_coding	protein_coding,retained_intron,nonsense_mediated_decay	NA	NA	NA
ENSMUSG00000032932	Hspa13	1.1e-05	1.02786	protein_coding	protein_coding	protein_coding,retained_intron	NA	NA	NA
ENSMUSG00000066258	Trim12a	0.00112022	1.02876	protein_coding	protein_coding	processed_transcript,protein_coding,retained_intron	NA	NA	NA
ENSMUSG00000024858	Grk2	5.03e-09	1.03248	protein_coding	protein_coding	protein_coding,nonsense_mediated_decay,retained_intron	NA	NA	NA
ENSMUSG00000090035	Galnt4	4.45e-09	1.03302	protein_coding	protein_coding	protein_coding	NA	NA	NA
ENSMUSG00000022824	Muc13	0.000248229	1.03409	protein_coding	protein_coding	protein_coding	NA	NA	NA
ENSMUSG00000002227	Mov10	0.000354385	1.03512	protein_coding	protein_coding	protein_coding,nonsense_mediated_decay,processed_transcript,retained_intron	NA	NA	NA
ENSMUSG00000036091	Hyal3	0.018406	1.03632	protein_coding	protein_coding	protein_coding	NA	NA	NA
ENSMUSG00000031903	Pla2g15	0.000225489	1.03752	protein_coding	protein_coding	protein_coding,retained_intron,processed_transcript	NA	NA	NA
ENSMUSG00000039530	Tusc3	3.25e-08	1.03826	protein_coding	protein_coding	protein_coding,nonsense_mediated_decay,retained_intron	NA	NA	NA
ENSMUSG00000078485	Plekhn1	0.000126952	1.04147	protein_coding	protein_coding	protein_coding	NA	NA	NA
ENSMUSG00000060600	Eno3	0.00121482	1.04201	protein_coding	protein_coding	protein_coding,retained_intron	NA	NA	NA
ENSMUSG00000020873	Slc35b1	2.37e-08	1.04226	protein_coding	protein_coding	protein_coding,nonsense_mediated_decay,retained_intron	NA	NA	NA
ENSMUSG00000010307	Tmem86a	0.000232995	1.04326	protein_coding	protein_coding	protein_coding,processed_transcript	NA	NA	NA
ENSMUSG00000052117	D630039A03Rik	8.95e-10	1.04361	protein_coding	protein_coding	protein_coding	NA	NA	NA
ENSMUSG00000022332	Khdrbs3	0.000752827	1.04578	protein_coding	protein_coding	protein_coding	NA	NA	NA
ENSMUSG00000000253	Gmpr	0.0192401	1.04749	protein_coding	protein_coding	protein_coding,retained_intron	NA	NA	NA
ENSMUSG00000023050	Map3k12	0.00510947	1.049	protein_coding	protein_coding	protein_coding,processed_transcript	NA	NA	NA
ENSMUSG00000037185	Krt80	0.000676821	1.0491	protein_coding	protein_coding	protein_coding	NA	NA	NA
ENSMUSG00000032418	Me1	7.54e-05	1.04994	protein_coding	protein_coding	protein_coding,processed_transcript	NA	NA	NA
ENSMUSG00000009108	Gnat2	0.0225342	1.05322	protein_coding	protein_coding	protein_coding,retained_intron,processed_transcript	NA	NA	NA
ENSMUSG00000024313	Mep1b	0.00046271	1.05584	protein_coding	protein_coding	protein_coding	NA	NA	NA
ENSMUSG00000039621	Prex1	0.00164808	1.05842	protein_coding	protein_coding	protein_coding,processed_transcript,retained_intron	NA	NA	NA
ENSMUSG00000045838	A430105I19Rik	5.14e-06	1.05851	protein_coding	protein_coding	protein_coding,retained_intron	NA	NA	NA
ENSMUSG00000044024	Rell2	0.0140121	1.06373	protein_coding	protein_coding	nonsense_mediated_decay,protein_coding,retained_intron	NA	NA	NA
ENSMUSG00000023328	Ache	0.0341384	1.06472	protein_coding	protein_coding	protein_coding,retained_intron	NA	NA	NA
ENSMUSG00000021557	Agtpbp1	0.0222402	1.06513	protein_coding	protein_coding	processed_transcript,protein_coding,nonsense_mediated_decay	NA	NA	NA
ENSMUSG00000039168	Dap	4.63e-06	1.06599	protein_coding	protein_coding	protein_coding	NA	NA	NA
ENSMUSG00000038178	Slc43a2	0.00409148	1.06662	protein_coding	protein_coding	protein_coding,processed_transcript,retained_intron	NA	NA	NA
ENSMUSG00000035901	Dennd5a	0.00972252	1.06845	protein_coding	protein_coding	protein_coding,retained_intron,processed_transcript	NA	NA	NA
ENSMUSG00000020818	Mfsd11	1.25e-07	1.07243	protein_coding	protein_coding	nonsense_mediated_decay,retained_intron,processed_transcript,protein_coding	NA	NA	NA
ENSMUSG00000035521	Gnptg	4.49e-10	1.07279	protein_coding	protein_coding	protein_coding	NA	NA	NA
ENSMUSG00000041439	Mfsd6	6.2e-09	1.07328	protein_coding	protein_coding	protein_coding,retained_intron,processed_transcript	NA	NA	NA
ENSMUSG00000039234	Sec24d	9.44e-08	1.07584	protein_coding	protein_coding	protein_coding,retained_intron,processed_transcript	NA	NA	NA
ENSMUSG00000024193	Phf1	7.33e-05	1.07591	protein_coding	protein_coding	protein_coding	NA	NA	NA
ENSMUSG00000033917	Gde1	0.00736248	1.07781	protein_coding	protein_coding	protein_coding,nonsense_mediated_decay	NA	NA	NA
ENSMUSG00000024646	Cyb5a	0.00752278	1.07837	protein_coding	protein_coding	protein_coding,nonsense_mediated_decay,retained_intron	NA	NA	NA
ENSMUSG00000067925	Cxx1a	0.00129134	1.07861	protein_coding	protein_coding	protein_coding	NA	NA	NA
ENSMUSG00000025151	Maged1	0.000583466	1.07867	protein_coding	protein_coding	protein_coding,retained_intron	NA	NA	NA
ENSMUSG00000030321	Efcab12	0.0441016	1.08222	protein_coding	protein_coding	protein_coding,nonsense_mediated_decay	NA	NA	NA
ENSMUSG00000031919	Tmed6	4.73e-08	1.08252	protein_coding	protein_coding	protein_coding	NA	NA	NA
ENSMUSG00000032182	Yipf2	2.5e-10	1.08265	protein_coding	protein_coding	protein_coding	NA	NA	NA
ENSMUSG00000025351	Cd63	1.61e-08	1.08308	protein_coding	protein_coding	protein_coding	NA	NA	NA
ENSMUSG00000040327	Cul9	9.37e-05	1.08321	protein_coding	protein_coding	retained_intron,protein_coding	NA	NA	NA
ENSMUSG00000066152	Slc31a2	3.48e-05	1.08327	protein_coding	protein_coding	protein_coding	NA	NA	NA
ENSMUSG00000070284	Gmppb	5.49e-10	1.08548	protein_coding	protein_coding	protein_coding,processed_transcript,retained_intron	NA	NA	NA
ENSMUSG00000039157	Fam102a	5.3e-06	1.08696	protein_coding	protein_coding	retained_intron,protein_coding,processed_transcript	NA	NA	NA
ENSMUSG00000028466	Creb3	1.89e-07	1.08696	protein_coding	protein_coding	protein_coding,retained_intron	NA	NA	NA
ENSMUSG00000026520	Pycr2	6.95e-07	1.08708	protein_coding	protein_coding	protein_coding,retained_intron	NA	NA	NA
ENSMUSG00000021266	Wars	6.89e-10	1.08897	protein_coding	protein_coding	protein_coding,nonsense_mediated_decay,retained_intron	NA	NA	NA
ENSMUSG00000046447	Camk2n1	0.000813703	1.09139	protein_coding	protein_coding	protein_coding	NA	NA	NA
ENSMUSG00000020377	Ltc4s	0.0477311	1.09157	protein_coding	protein_coding	protein_coding	NA	NA	NA
ENSMUSG00000037762	Slc16a9	0.0360751	1.0932	protein_coding	protein_coding	protein_coding,retained_intron	NA	NA	NA
ENSMUSG00000049307	Fut4	6.9e-09	1.09347	protein_coding	protein_coding	protein_coding	NA	NA	NA
ENSMUSG00000027207	Galk2	1.52e-05	1.09365	protein_coding	protein_coding	processed_transcript,protein_coding,nonsense_mediated_decay,retained_intron	NA	NA	NA
ENSMUSG00000028057	Rit1	3.06e-06	1.09429	protein_coding	protein_coding	protein_coding,retained_intron,nonsense_mediated_decay	NA	NA	NA
ENSMUSG00000022711	Pmm2	1.22e-10	1.09824	protein_coding	protein_coding	protein_coding,retained_intron,processed_transcript	NA	NA	NA
ENSMUSG00000059708	Akap17b	0.00158859	1.09916	protein_coding	protein_coding	protein_coding	NA	NA	NA
ENSMUSG00000025528	2010106E10Rik	0.0380731	1.09962	protein_coding	protein_coding	protein_coding	NA	NA	NA
ENSMUSG00000064215	Ifi27	0.000874697	1.10125	protein_coding	protein_coding	protein_coding,retained_intron	NA	NA	NA
ENSMUSG00000054723	Vmac	7.52e-10	1.10285	protein_coding	protein_coding	protein_coding	NA	NA	NA
ENSMUSG00000033530	Ttc7b	3.34e-07	1.10359	protein_coding	protein_coding	protein_coding	NA	NA	NA
ENSMUSG00000040181	Fmo1	8.17e-05	1.10426	protein_coding	protein_coding	protein_coding,processed_transcript,retained_intron	NA	NA	NA
ENSMUSG00000003228	Grk5	0.0023825	1.1052	protein_coding	protein_coding	protein_coding	NA	NA	NA
ENSMUSG00000068923	Syt11	0.0171292	1.10773	protein_coding	protein_coding	protein_coding,processed_transcript	NA	NA	NA
ENSMUSG00000033590	Myo5c	7.51e-07	1.10786	protein_coding	protein_coding	protein_coding,processed_transcript,nonsense_mediated_decay,retained_intron	NA	NA	NA
ENSMUSG00000031367	Ap1s2	0.0282159	1.10793	protein_coding	protein_coding	protein_coding	NA	NA	NA
ENSMUSG00000028108	Ecm1	0.00804973	1.10925	protein_coding	protein_coding	protein_coding,retained_intron	NA	NA	NA
ENSMUSG00000032350	Gclc	0.00784364	1.10929	protein_coding	protein_coding	protein_coding,processed_transcript	NA	NA	NA
ENSMUSG00000055976	Cldn23	0.00152918	1.11037	protein_coding	protein_coding	protein_coding	NA	NA	NA
ENSMUSG00000020462	Cfap36	0.00133316	1.11247	protein_coding	protein_coding	protein_coding,retained_intron	NA	NA	NA
ENSMUSG00000027248	Pdia3	8.79e-11	1.11445	protein_coding	protein_coding	protein_coding,processed_transcript,nonsense_mediated_decay,retained_intron	NA	NA	NA
ENSMUSG00000037887	Dusp8	0.00338874	1.11662	protein_coding	protein_coding	protein_coding	NA	NA	NA
ENSMUSG00000001105	Ift20	1.31e-06	1.1167	protein_coding	protein_coding	protein_coding,retained_intron	NA	NA	NA
ENSMUSG00000035509	Fbxl21	0.0147865	1.11682	protein_coding	protein_coding	protein_coding,nonsense_mediated_decay	NA	NA	NA
ENSMUSG00000044456	Rin3	2.34e-06	1.11725	protein_coding	protein_coding	protein_coding,processed_transcript,retained_intron	NA	NA	NA
ENSMUSG00000039158	Akna	0.000424613	1.11735	protein_coding	protein_coding	protein_coding,processed_transcript	NA	NA	NA
ENSMUSG00000020230	Prmt2	6.64e-08	1.11834	protein_coding	protein_coding	protein_coding,nonsense_mediated_decay,retained_intron,processed_transcript	NA	NA	NA
ENSMUSG00000044734	Serpinb1a	0.00131985	1.11947	protein_coding	protein_coding	protein_coding	NA	NA	NA
ENSMUSG00000036225	Kctd1	0.0498052	1.12056	protein_coding	protein_coding	protein_coding	NA	NA	NA
ENSMUSG00000048349	Pou4f1	0.0424987	1.12064	protein_coding	protein_coding	protein_coding,processed_transcript	NA	NA	NA
ENSMUSG00000046058	Eid2	0.00329126	1.12194	protein_coding	protein_coding	protein_coding	NA	NA	NA
ENSMUSG00000003814	Calr	2.03e-09	1.12227	protein_coding	protein_coding	protein_coding,retained_intron	NA	NA	NA
ENSMUSG00000006273	Atp6v1b2	4.69e-11	1.12255	protein_coding	protein_coding	protein_coding,retained_intron	NA	NA	NA
ENSMUSG00000024644	Cndp2	5.68e-09	1.12256	protein_coding	protein_coding	protein_coding	NA	NA	NA
ENSMUSG00000028496	Mllt3	1.31e-09	1.12303	protein_coding	protein_coding	protein_coding,processed_transcript,retained_intron,nonsense_mediated_decay	NA	NA	NA
ENSMUSG00000047205	Dusp18	4.24e-10	1.12396	protein_coding	protein_coding	protein_coding	NA	NA	NA
ENSMUSG00000032557	Uba5	5.05e-10	1.12409	protein_coding	protein_coding	protein_coding,nonsense_mediated_decay,retained_intron	NA	NA	NA
ENSMUSG00000074604	Mgst2	4.27e-11	1.12447	protein_coding	protein_coding	processed_transcript,protein_coding,retained_intron	NA	NA	NA
ENSMUSG00000008461	Fut1	0.00110255	1.12476	protein_coding	protein_coding	protein_coding	NA	NA	NA
ENSMUSG00000025592	Dach2	0.0467475	1.12485	protein_coding	protein_coding	protein_coding,retained_intron,processed_transcript	NA	NA	NA
ENSMUSG00000043432	Leng9	1.89e-08	1.12643	protein_coding	protein_coding	protein_coding	NA	NA	NA
ENSMUSG00000053460	Ggcx	9.8e-05	1.12755	protein_coding	protein_coding	protein_coding,nonsense_mediated_decay	NA	NA	NA
ENSMUSG00000020571	Pdia6	2.05e-11	1.12866	protein_coding	protein_coding	protein_coding,retained_intron,processed_transcript	NA	NA	NA
ENSMUSG00000013698	Pea15a	9.14e-08	1.1288	protein_coding	protein_coding	protein_coding,processed_transcript,retained_intron	NA	NA	NA
ENSMUSG00000022773	Ypel1	0.04638	1.12924	protein_coding	protein_coding	protein_coding,processed_transcript,retained_intron,nonsense_mediated_decay	NA	NA	NA
ENSMUSG00000058672	Tubb2a	6.34e-11	1.12953	protein_coding	protein_coding	protein_coding	NA	NA	NA
ENSMUSG00000042532	Golga7b	0.00263905	1.12954	protein_coding	protein_coding	protein_coding	NA	NA	NA
ENSMUSG00000035451	Foxa1	0.00479448	1.12963	protein_coding	protein_coding	protein_coding	NA	NA	NA
ENSMUSG00000071551	Akr1c19	2.42e-06	1.13044	protein_coding	protein_coding	protein_coding,processed_transcript	NA	NA	NA
ENSMUSG00000046070	Igfals	0.00303494	1.13279	protein_coding	protein_coding	protein_coding	NA	NA	NA
ENSMUSG00000032997	Chpf	0.0203041	1.13349	protein_coding	protein_coding	protein_coding,nonsense_mediated_decay,retained_intron	NA	NA	NA
ENSMUSG00000005267	Zfp287	0.0246135	1.13484	protein_coding	protein_coding	protein_coding,nonsense_mediated_decay,retained_intron	NA	NA	NA
ENSMUSG00000030407	Qpctl	1.67e-09	1.13576	protein_coding	protein_coding	protein_coding,retained_intron	NA	NA	NA
ENSMUSG00000020576	Nbas	2.86e-07	1.13584	protein_coding	protein_coding	protein_coding	NA	NA	NA
ENSMUSG00000052229	Gpr17	0.0159788	1.13603	protein_coding	protein_coding	protein_coding	NA	NA	NA
ENSMUSG00000021838	Samd4	0.0100018	1.13622	protein_coding	protein_coding	protein_coding,processed_transcript	NA	NA	NA
ENSMUSG00000001366	Fbxo9	3.25e-08	1.13641	protein_coding	protein_coding	protein_coding,retained_intron	NA	NA	NA
ENSMUSG00000025347	Mettl7b	1.52e-09	1.13734	protein_coding	protein_coding	protein_coding	NA	NA	NA
ENSMUSG00000025085	Ablim1	3.29e-05	1.13752	protein_coding	protein_coding	protein_coding,retained_intron,processed_transcript	NA	NA	NA
ENSMUSG00000075289	Carns1	0.0133712	1.13934	protein_coding	protein_coding	protein_coding	NA	NA	NA
ENSMUSG00000052085	Dock8	0.000540463	1.13969	protein_coding	protein_coding	protein_coding	NA	NA	NA
ENSMUSG00000020226	Slc5a4b	0.00202219	1.13979	protein_coding	protein_coding	protein_coding	NA	NA	NA
ENSMUSG00000094651	Gal3st2	0.00381893	1.14147	protein_coding	protein_coding	processed_transcript,protein_coding	NA	NA	NA
ENSMUSG00000061825	Ces2c	0.0123251	1.142	protein_coding	protein_coding	protein_coding,retained_intron	NA	NA	NA
ENSMUSG00000029403	Cdkl2	0.00283329	1.14252	protein_coding	protein_coding	protein_coding,retained_intron,TEC	NA	NA	NA
ENSMUSG00000067377	Tspan6	0.00103328	1.14391	protein_coding	protein_coding	protein_coding,processed_transcript	NA	NA	NA
ENSMUSG00000028843	Sh3bgrl3	6.87e-06	1.14798	protein_coding	protein_coding	protein_coding,retained_intron	NA	NA	NA
ENSMUSG00000045094	Arhgef37	0.00283478	1.14974	protein_coding	protein_coding	protein_coding	NA	NA	NA
ENSMUSG00000026272	Agxt	0.0272937	1.15065	protein_coding	protein_coding	protein_coding,retained_intron,processed_transcript	NA	NA	NA
ENSMUSG00000036995	Asap3	0.00344048	1.1514	protein_coding	protein_coding	protein_coding	NA	NA	NA
ENSMUSG00000072964	Bhlhb9	0.035994	1.15142	protein_coding	protein_coding	retained_intron,protein_coding	NA	NA	NA
ENSMUSG00000017057	Il13ra1	1.95e-11	1.15227	protein_coding	protein_coding	protein_coding	NA	NA	NA
ENSMUSG00000022900	Ildr1	0.00103301	1.15841	protein_coding	protein_coding	protein_coding,retained_intron	NA	NA	NA
ENSMUSG00000044860	Gm1123	1.81e-09	1.15889	protein_coding	protein_coding	protein_coding	NA	NA	NA
ENSMUSG00000041836	Ptpre	0.00187675	1.16232	protein_coding	protein_coding	protein_coding,processed_transcript	NA	NA	NA
ENSMUSG00000040339	Fam102b	2.57e-08	1.1634	protein_coding	protein_coding	protein_coding	NA	NA	NA
ENSMUSG00000031150	Ccdc120	0.00215753	1.16373	protein_coding	protein_coding	protein_coding,processed_transcript	NA	NA	NA
ENSMUSG00000042306	S100a14	0.0126574	1.16578	protein_coding	protein_coding	protein_coding,retained_intron	NA	NA	NA
ENSMUSG00000072812	Ahnak2	0.000738932	1.17062	protein_coding	protein_coding	protein_coding	NA	NA	NA
ENSMUSG00000035699	Slc51a	0.020299	1.17326	protein_coding	protein_coding	protein_coding	NA	NA	NA
ENSMUSG00000029033	Acap3	0.000947858	1.1738	protein_coding	protein_coding	protein_coding,processed_transcript,retained_intron	NA	NA	NA
ENSMUSG00000026509	Capn2	4.16e-05	1.17488	protein_coding	protein_coding	protein_coding,retained_intron	NA	NA	NA
ENSMUSG00000054252	Fgfr3	1.07e-08	1.1764	protein_coding	protein_coding	protein_coding,retained_intron	NA	NA	NA
ENSMUSG00000032115	Hyou1	1.64e-11	1.17685	protein_coding	protein_coding	protein_coding,nonsense_mediated_decay,retained_intron	NA	NA	NA
ENSMUSG00000020520	Galnt10	2.69e-12	1.17727	protein_coding	protein_coding	protein_coding	NA	NA	NA
ENSMUSG00000027456	Sdcbp2	0.00274127	1.17744	protein_coding	protein_coding	protein_coding	NA	NA	NA
ENSMUSG00000020225	Tmbim4	1.62e-06	1.17792	protein_coding	protein_coding	processed_transcript,protein_coding,nonsense_mediated_decay,retained_intron	NA	NA	NA
ENSMUSG00000044906	4930503L19Rik	0.0299032	1.18294	protein_coding	protein_coding	retained_intron,nonsense_mediated_decay,protein_coding	NA	NA	NA
ENSMUSG00000066324	Impad1	0.000588662	1.18374	protein_coding	protein_coding	protein_coding	NA	NA	NA
ENSMUSG00000040699	Limd2	8.28e-06	1.18395	protein_coding	protein_coding	protein_coding,processed_transcript	NA	NA	NA
ENSMUSG00000020894	Vamp2	2.83e-10	1.18906	protein_coding	protein_coding	protein_coding,retained_intron,processed_transcript	NA	NA	NA
ENSMUSG00000023039	Krt7	3.24e-12	1.18958	protein_coding	protein_coding	processed_transcript,protein_coding,retained_intron	NA	NA	NA
ENSMUSG00000048058	Ldlrad3	0.0173379	1.19187	protein_coding	protein_coding	protein_coding,processed_transcript	NA	NA	NA
ENSMUSG00000032776	Mctp2	2.97e-07	1.19283	protein_coding	protein_coding	protein_coding,nonsense_mediated_decay,retained_intron	NA	NA	NA
ENSMUSG00000029449	Rhof	0.000551876	1.19395	protein_coding	protein_coding	protein_coding,nonsense_mediated_decay,processed_transcript	NA	NA	NA
ENSMUSG00000037738	Nek5	8.85e-05	1.19411	protein_coding	protein_coding	protein_coding,nonsense_mediated_decay,processed_transcript	NA	NA	NA
ENSMUSG00000002233	Rhoc	0.00472923	1.19503	protein_coding	protein_coding	protein_coding,retained_intron	NA	NA	NA
ENSMUSG00000092486	2610524H06Rik	0.000135509	1.19565	protein_coding	protein_coding	protein_coding	NA	NA	NA
ENSMUSG00000055862	Izumo4	1.46e-05	1.19728	protein_coding	protein_coding	protein_coding	NA	NA	NA
ENSMUSG00000022540	Rogdi	5.79e-08	1.19908	protein_coding	protein_coding	protein_coding,retained_intron	NA	NA	NA
ENSMUSG00000031938	4931406C07Rik	2.01e-05	1.19912	protein_coding	protein_coding	protein_coding,retained_intron	NA	NA	NA
ENSMUSG00000030353	Tead4	0.000195336	1.20186	protein_coding	protein_coding	protein_coding	NA	NA	NA
ENSMUSG00000042564	Fam227a	0.0472807	1.20188	protein_coding	protein_coding	protein_coding,nonsense_mediated_decay,retained_intron	NA	NA	NA
ENSMUSG00000037279	Ovol2	1.59e-06	1.20213	protein_coding	protein_coding	protein_coding,processed_transcript	NA	NA	NA
ENSMUSG00000050192	Eif5a2	0.00142904	1.20284	protein_coding	protein_coding	protein_coding	NA	NA	NA
ENSMUSG00000021061	Sptb	0.00488078	1.20403	protein_coding	protein_coding	protein_coding,retained_intron	NA	NA	NA
ENSMUSG00000032348	Gsta4	0.000696073	1.20479	protein_coding	protein_coding	protein_coding	NA	NA	NA
ENSMUSG00000043419	Chd3os	0.0273552	1.20686	protein_coding	protein_coding	protein_coding	NA	NA	NA
ENSMUSG00000031586	Rbpms	0.0209873	1.20687	protein_coding	protein_coding	protein_coding,nonsense_mediated_decay,processed_transcript,retained_intron	NA	NA	NA
ENSMUSG00000022136	Dnajc3	2.03e-09	1.20725	protein_coding	protein_coding	protein_coding	NA	NA	NA
ENSMUSG00000025059	Gk	4.45e-05	1.21116	protein_coding	protein_coding	protein_coding,processed_transcript,retained_intron	NA	NA	NA
ENSMUSG00000020941	Map3k14	1.25e-06	1.21253	protein_coding	protein_coding	protein_coding,processed_transcript	NA	NA	NA
ENSMUSG00000030897	Cnga4	0.0480615	1.21801	protein_coding	protein_coding	protein_coding	NA	NA	NA
ENSMUSG00000029561	Oasl2	0.0490852	1.21909	protein_coding	protein_coding	protein_coding,retained_intron,nonsense_mediated_decay	NA	NA	NA
ENSMUSG00000015468	Notch4	0.0428259	1.22095	protein_coding	protein_coding	protein_coding,processed_transcript,nonsense_mediated_decay,retained_intron	NA	NA	NA
ENSMUSG00000045007	Tubg2	0.000197149	1.22155	protein_coding	protein_coding	protein_coding	NA	NA	NA
ENSMUSG00000026870	Cutal	0.000633565	1.22336	protein_coding	protein_coding	protein_coding,retained_intron,nonsense_mediated_decay	NA	NA	NA
ENSMUSG00000027544	Nfatc2	0.000132831	1.22421	protein_coding	protein_coding	protein_coding,processed_transcript,retained_intron	NA	NA	NA
ENSMUSG00000032120	C2cd2l	0.00456642	1.22737	protein_coding	protein_coding	protein_coding,nonsense_mediated_decay,retained_intron	NA	NA	NA
ENSMUSG00000031373	Car5b	0.0162898	1.22738	protein_coding	protein_coding	protein_coding,retained_intron	NA	NA	NA
ENSMUSG00000020717	Pecam1	0.0289821	1.22771	protein_coding	protein_coding	protein_coding,retained_intron	NA	NA	NA
ENSMUSG00000051579	Tceal8	0.0186795	1.22824	protein_coding	protein_coding	protein_coding	NA	NA	NA
ENSMUSG00000039050	Osbpl2	1.08e-12	1.22868	protein_coding	protein_coding	protein_coding,processed_transcript,retained_intron	NA	NA	NA
ENSMUSG00000020261	Slc36a1	1.2e-08	1.22883	protein_coding	protein_coding	protein_coding,processed_transcript	NA	NA	NA
ENSMUSG00000042041	2010003K11Rik	0.00639008	1.22897	protein_coding	protein_coding	protein_coding	NA	NA	NA
ENSMUSG00000040389	Wdr47	0.0135357	1.22939	protein_coding	protein_coding	protein_coding,nonsense_mediated_decay,retained_intron,processed_transcript	NA	NA	NA
ENSMUSG00000006342	Susd2	0.0147969	1.22953	protein_coding	protein_coding	protein_coding	NA	NA	NA
ENSMUSG00000015837	Sqstm1	5.47e-13	1.22965	protein_coding	protein_coding	protein_coding,retained_intron	NA	NA	NA
ENSMUSG00000043088	Il17re	0.00115313	1.2305	protein_coding	protein_coding	protein_coding,retained_intron,nonsense_mediated_decay	NA	NA	NA
ENSMUSG00000055809	Dnaaf3	0.00126464	1.23331	protein_coding	protein_coding	protein_coding	NA	NA	NA
ENSMUSG00000031255	Sytl4	0.00713266	1.23494	protein_coding	protein_coding	protein_coding,processed_transcript	NA	NA	NA
ENSMUSG00000039395	Mreg	0.0335283	1.23621	protein_coding	protein_coding	protein_coding	NA	NA	NA
ENSMUSG00000020423	Btg2	1.61e-12	1.23626	protein_coding	protein_coding	protein_coding	NA	NA	NA
ENSMUSG00000073399	Trim40	0.00492692	1.23654	protein_coding	protein_coding	protein_coding,retained_intron,processed_transcript	NA	NA	NA
ENSMUSG00000037580	Gch1	0.00360018	1.23816	protein_coding	protein_coding	protein_coding	NA	NA	NA
ENSMUSG00000035722	Abca7	4.04e-08	1.23886	protein_coding	protein_coding	protein_coding	NA	NA	NA
ENSMUSG00000019888	Mgat4c	0.000730237	1.23931	protein_coding	protein_coding	protein_coding,retained_intron,processed_transcript	NA	NA	NA
ENSMUSG00000027890	Gstm4	0.0226625	1.23975	protein_coding	protein_coding	protein_coding	NA	NA	NA
ENSMUSG00000022043	Trim35	0.00347809	1.24218	protein_coding	protein_coding	protein_coding	NA	NA	NA
ENSMUSG00000034591	Slc41a2	0.000129493	1.24308	protein_coding	protein_coding	protein_coding,processed_transcript	NA	NA	NA
ENSMUSG00000056050	Mia3	2.96e-12	1.24826	protein_coding	protein_coding	protein_coding,retained_intron	NA	NA	NA
ENSMUSG00000110573	RP23-383B20.1	0.0104253	1.24833	protein_coding	protein_coding	protein_coding	NA	NA	NA
ENSMUSG00000045790	Ccdc149	3.74e-07	1.24943	protein_coding	protein_coding	protein_coding	NA	NA	NA
ENSMUSG00000037447	Arid5a	0.000105967	1.25239	protein_coding	protein_coding	protein_coding,nonsense_mediated_decay,retained_intron,processed_transcript	NA	NA	NA
ENSMUSG00000034226	Rhov	0.00185589	1.25262	protein_coding	protein_coding	protein_coding	NA	NA	NA
ENSMUSG00000005686	Ampd3	1.31e-07	1.25278	protein_coding	protein_coding	protein_coding,processed_transcript,retained_intron	NA	NA	NA
ENSMUSG00000032192	Gnb5	2.35e-06	1.25332	protein_coding	protein_coding	protein_coding,nonsense_mediated_decay,processed_transcript,retained_intron	NA	NA	NA
ENSMUSG00000080316	Spaca6	0.0407512	1.25551	protein_coding	protein_coding	processed_transcript,retained_intron,protein_coding,nonsense_mediated_decay	NA	NA	NA
ENSMUSG00000061455	Stx17	7.63e-11	1.25552	protein_coding	protein_coding	protein_coding	NA	NA	NA
ENSMUSG00000031570	Plpp5	7.4e-14	1.26034	protein_coding	protein_coding	protein_coding,nonsense_mediated_decay,retained_intron	NA	NA	NA
ENSMUSG00000028860	Sytl1	7e-05	1.26092	protein_coding	protein_coding	protein_coding,processed_transcript	NA	NA	NA
ENSMUSG00000055805	Fmnl1	0.00207851	1.26135	protein_coding	protein_coding	protein_coding,processed_transcript,retained_intron	NA	NA	NA
ENSMUSG00000015396	Cd83	1.12e-08	1.26755	protein_coding	protein_coding	protein_coding	NA	NA	NA
ENSMUSG00000050052	Tdrp	0.0245904	1.2704	protein_coding	protein_coding	protein_coding,processed_transcript,retained_intron	NA	NA	NA
ENSMUSG00000026864	Hspa5	3.67e-14	1.27833	protein_coding	protein_coding	protein_coding,nonsense_mediated_decay,retained_intron	NA	NA	NA
ENSMUSG00000045031	Cetn4	0.0463952	1.27847	protein_coding	protein_coding	protein_coding	NA	NA	NA
ENSMUSG00000026102	Inpp1	0.0315161	1.27875	protein_coding	protein_coding	protein_coding,nonsense_mediated_decay,retained_intron	NA	NA	NA
ENSMUSG00000030263	Lrmp	0.00547981	1.28049	protein_coding	protein_coding	nonsense_mediated_decay,protein_coding,retained_intron,processed_transcript	NA	NA	NA
ENSMUSG00000069814	Ccdc92b	0.00408266	1.28335	protein_coding	protein_coding	protein_coding	NA	NA	NA
ENSMUSG00000001435	Col18a1	0.000147023	1.28402	protein_coding	protein_coding	protein_coding	NA	NA	NA
ENSMUSG00000025091	Pnliprp2	2.74e-05	1.28412	protein_coding	protein_coding	protein_coding	NA	NA	NA
ENSMUSG00000052302	Tbc1d30	5.46e-11	1.28484	protein_coding	protein_coding	protein_coding	NA	NA	NA
ENSMUSG00000058063	Trim31	1.25e-05	1.28558	protein_coding	protein_coding	protein_coding	NA	NA	NA
ENSMUSG00000044912	Syt16	0.0220129	1.2859	protein_coding	protein_coding	protein_coding	NA	NA	NA
ENSMUSG00000031770	Herpud1	7.23e-15	1.28664	protein_coding	protein_coding	protein_coding,nonsense_mediated_decay,retained_intron	NA	NA	NA
ENSMUSG00000111709	Gm3776	0.00645398	1.28859	protein_coding	protein_coding	protein_coding	NA	NA	NA
ENSMUSG00000048481	Mypop	0.00670638	1.28972	protein_coding	protein_coding	protein_coding,retained_intron	NA	NA	NA
ENSMUSG00000017144	Rnd3	2.42e-14	1.28977	protein_coding	protein_coding	protein_coding,retained_intron	NA	NA	NA
ENSMUSG00000054453	Sytl5	0.00456283	1.28995	protein_coding	protein_coding	protein_coding	NA	NA	NA
ENSMUSG00000030717	Nupr1	0.00371753	1.29225	protein_coding	protein_coding	protein_coding,retained_intron,nonsense_mediated_decay,processed_transcript	NA	NA	NA
ENSMUSG00000044068	Zrsr1	1.36e-06	1.29338	protein_coding	protein_coding	protein_coding	NA	NA	NA
ENSMUSG00000042828	Trim72	0.00420338	1.29431	protein_coding	protein_coding	protein_coding	NA	NA	NA
ENSMUSG00000032470	Mras	0.00412906	1.29493	protein_coding	protein_coding	protein_coding,retained_intron	NA	NA	NA
ENSMUSG00000023827	Agpat4	4.04e-06	1.29544	protein_coding	protein_coding	protein_coding,processed_transcript,nonsense_mediated_decay,retained_intron	NA	NA	NA
ENSMUSG00000029650	Slc46a3	0.00785029	1.29647	protein_coding	protein_coding	protein_coding,retained_intron	NA	NA	NA
ENSMUSG00000026473	Glul	1.24e-12	1.29665	protein_coding	protein_coding	protein_coding,processed_transcript,retained_intron	NA	NA	NA
ENSMUSG00000058921	Slc10a5	0.00132139	1.29704	protein_coding	protein_coding	protein_coding	NA	NA	NA
ENSMUSG00000024810	Il33	0.0350747	1.29715	protein_coding	protein_coding	protein_coding	NA	NA	NA
ENSMUSG00000046402	Rbp1	6.69e-05	1.29753	protein_coding	protein_coding	protein_coding	NA	NA	NA
ENSMUSG00000022769	Sdf2l1	1.01e-07	1.29792	protein_coding	protein_coding	protein_coding	NA	NA	NA
ENSMUSG00000044468	Fam46c	0.00882083	1.2994	protein_coding	protein_coding	processed_transcript,protein_coding	NA	NA	NA
ENSMUSG00000028088	Fmo5	0.000702187	1.29961	protein_coding	protein_coding	protein_coding,retained_intron,processed_transcript	NA	NA	NA
ENSMUSG00000021123	Rdh12	0.00981368	1.30454	protein_coding	protein_coding	protein_coding,retained_intron	NA	NA	NA
ENSMUSG00000049044	Rapgef4	0.00776016	1.30662	protein_coding	protein_coding	protein_coding,processed_transcript	NA	NA	NA
ENSMUSG00000023057	Fabp2	0.000176652	1.30793	protein_coding	protein_coding	protein_coding	NA	NA	NA
ENSMUSG00000032978	Guca2b	0.00243452	1.31106	protein_coding	protein_coding	protein_coding	NA	NA	NA
ENSMUSG00000060935	Tmem263	5.01e-10	1.31123	protein_coding	protein_coding	protein_coding,nonsense_mediated_decay	NA	NA	NA
ENSMUSG00000053310	Nrgn	0.0483305	1.31291	protein_coding	protein_coding	protein_coding,processed_transcript	NA	NA	NA
ENSMUSG00000026480	Ncf2	3.8e-05	1.31295	protein_coding	protein_coding	protein_coding,retained_intron	NA	NA	NA
ENSMUSG00000031532	Saraf	2.16e-15	1.3133	protein_coding	protein_coding	processed_transcript,protein_coding,retained_intron	NA	NA	NA
ENSMUSG00000000686	Abhd15	0.0119838	1.31386	protein_coding	protein_coding	protein_coding	NA	NA	NA
ENSMUSG00000038451	Spsb2	4.83e-10	1.31442	protein_coding	protein_coding	protein_coding	NA	NA	NA
ENSMUSG00000019564	Arid3a	0.0193792	1.31523	protein_coding	protein_coding	protein_coding,processed_transcript	NA	NA	NA
ENSMUSG00000070733	Fryl	3.16e-05	1.31534	protein_coding	protein_coding	protein_coding,processed_transcript,retained_intron	NA	NA	NA
ENSMUSG00000074896	Ifit3	0.0051201	1.31936	protein_coding	protein_coding	protein_coding	NA	NA	NA
ENSMUSG00000047115	Fam221a	2.77e-05	1.32129	protein_coding	protein_coding	protein_coding,processed_transcript,retained_intron	NA	NA	NA
ENSMUSG00000039270	Megf9	1.85e-05	1.32129	protein_coding	protein_coding	protein_coding,nonsense_mediated_decay	NA	NA	NA
ENSMUSG00000025810	Nrp1	0.0445901	1.3225	protein_coding	protein_coding	retained_intron,protein_coding	NA	NA	NA
ENSMUSG00000024807	Syvn1	3.37e-13	1.32286	protein_coding	protein_coding	protein_coding,retained_intron	NA	NA	NA
ENSMUSG00000064158	Izumo1	0.0219262	1.32313	protein_coding	protein_coding	protein_coding,retained_intron	NA	NA	NA
ENSMUSG00000050064	Zfp697	0.00406535	1.3241	protein_coding	protein_coding	processed_transcript,protein_coding	NA	NA	NA
ENSMUSG00000040714	Klc3	0.000227906	1.32512	protein_coding	protein_coding	protein_coding,retained_intron	NA	NA	NA
ENSMUSG00000031790	Mmp15	2.85e-10	1.3258	protein_coding	protein_coding	protein_coding,retained_intron	NA	NA	NA
ENSMUSG00000032593	Amigo3	0.00016808	1.32684	protein_coding	protein_coding	protein_coding	NA	NA	NA
ENSMUSG00000034112	Atp2c2	0.000802126	1.32826	protein_coding	protein_coding	protein_coding	NA	NA	NA
ENSMUSG00000030406	Gipr	0.00538061	1.33159	protein_coding	protein_coding	protein_coding,retained_intron,nonsense_mediated_decay	NA	NA	NA
ENSMUSG00000002504	Slc9a3r2	7.26e-08	1.33656	protein_coding	protein_coding	protein_coding	NA	NA	NA
ENSMUSG00000048911	Rnf24	1.18e-05	1.33659	protein_coding	protein_coding	protein_coding,nonsense_mediated_decay,retained_intron	NA	NA	NA
ENSMUSG00000038836	Agbl3	0.0477676	1.34106	protein_coding	protein_coding	protein_coding,retained_intron,nonsense_mediated_decay	NA	NA	NA
ENSMUSG00000073680	Tmem88b	0.00351916	1.34144	protein_coding	protein_coding	protein_coding	NA	NA	NA
ENSMUSG00000029602	Rasal1	0.00814939	1.34475	protein_coding	protein_coding	protein_coding,processed_transcript,retained_intron	NA	NA	NA
ENSMUSG00000025701	Alox5	0.0169773	1.34584	protein_coding	protein_coding	protein_coding,retained_intron,nonsense_mediated_decay,processed_transcript	NA	NA	NA
ENSMUSG00000030087	Klf15	0.0020368	1.3467	protein_coding	protein_coding	protein_coding	NA	NA	NA
ENSMUSG00000028986	Klhl7	5.24e-07	1.34753	protein_coding	protein_coding	protein_coding,nonsense_mediated_decay,retained_intron	NA	NA	NA
ENSMUSG00000074882	Cyp2c68	4.48e-05	1.34765	protein_coding	protein_coding	protein_coding	NA	NA	NA
ENSMUSG00000078670	Fam174b	1.04e-07	1.35002	protein_coding	protein_coding	protein_coding,retained_intron	NA	NA	NA
ENSMUSG00000038497	Tmco3	1.06e-09	1.35397	protein_coding	protein_coding	retained_intron,protein_coding,processed_transcript	NA	NA	NA
ENSMUSG00000070604	Vsig10l	0.0465618	1.35452	protein_coding	protein_coding	protein_coding,retained_intron,processed_transcript,nonsense_mediated_decay	NA	NA	NA
ENSMUSG00000056592	Zfp658	0.000112026	1.35473	protein_coding	protein_coding	protein_coding	NA	NA	NA
ENSMUSG00000049670	Morn4	0.000205284	1.356	protein_coding	protein_coding	protein_coding	NA	NA	NA
ENSMUSG00000075588	Hoxb2	0.00799447	1.35687	protein_coding	protein_coding	retained_intron,protein_coding	NA	NA	NA
ENSMUSG00000074183	Gsta1	0.000379537	1.35792	protein_coding	protein_coding	protein_coding,retained_intron	NA	NA	NA
ENSMUSG00000034858	Fam214a	0.00207368	1.36102	protein_coding	protein_coding	processed_transcript,protein_coding,nonsense_mediated_decay,retained_intron	NA	NA	NA
ENSMUSG00000071537	Klrg2	0.0421832	1.36152	protein_coding	protein_coding	nonsense_mediated_decay,protein_coding	NA	NA	NA
ENSMUSG00000022864	D16Ertd472e	0.0491701	1.36201	protein_coding	protein_coding	protein_coding	NA	NA	NA
ENSMUSG00000000942	Hoxa4	0.0100625	1.36241	protein_coding	protein_coding	protein_coding	NA	NA	NA
ENSMUSG00000026504	Sdccag8	5.61e-09	1.3627	protein_coding	protein_coding	protein_coding,nonsense_mediated_decay,retained_intron,processed_transcript	NA	NA	NA
ENSMUSG00000034614	Pik3ip1	0.0278406	1.36449	protein_coding	protein_coding	protein_coding,retained_intron,processed_transcript	NA	NA	NA
ENSMUSG00000055912	Tmem150a	0.000544108	1.36541	protein_coding	protein_coding	protein_coding,processed_transcript	NA	NA	NA
ENSMUSG00000033147	Slc22a15	1.48e-11	1.36619	protein_coding	protein_coding	protein_coding,processed_transcript,retained_intron,nonsense_mediated_decay	NA	NA	NA
ENSMUSG00000032733	Snx33	6.98e-08	1.36695	protein_coding	protein_coding	protein_coding	NA	NA	NA
ENSMUSG00000042179	Pnliprp1	0.00154678	1.36697	protein_coding	protein_coding	protein_coding	NA	NA	NA
ENSMUSG00000014905	Dnajb9	6.37e-15	1.36955	protein_coding	protein_coding	protein_coding	NA	NA	NA
ENSMUSG00000053182	Gm609	0.00194198	1.3697	protein_coding	protein_coding	processed_transcript,protein_coding	NA	NA	NA
ENSMUSG00000020577	Tspan13	8.17e-17	1.37173	protein_coding	protein_coding	protein_coding,nonsense_mediated_decay	NA	NA	NA
ENSMUSG00000032575	Manf	1.2e-16	1.37189	protein_coding	protein_coding	protein_coding,retained_intron	NA	NA	NA
ENSMUSG00000054630	Ugt2b5	0.00552514	1.37324	protein_coding	protein_coding	protein_coding	NA	NA	NA
ENSMUSG00000060314	Zfp941	0.0226625	1.37366	protein_coding	protein_coding	protein_coding,nonsense_mediated_decay	NA	NA	NA
ENSMUSG00000033427	Upb1	0.00352573	1.37443	protein_coding	protein_coding	protein_coding,retained_intron	NA	NA	NA
ENSMUSG00000021846	Peli2	0.00154749	1.37542	protein_coding	protein_coding	protein_coding	NA	NA	NA
ENSMUSG00000023272	Creld2	1.49e-15	1.37594	protein_coding	protein_coding	protein_coding	NA	NA	NA
ENSMUSG00000026811	St6galnac6	0.00126898	1.37682	protein_coding	protein_coding	protein_coding,nonsense_mediated_decay,retained_intron	NA	NA	NA
ENSMUSG00000024912	Fosl1	1.31e-06	1.37682	protein_coding	protein_coding	protein_coding	NA	NA	NA
ENSMUSG00000029700	Slc13a1	0.000735025	1.37876	protein_coding	protein_coding	protein_coding,processed_transcript,retained_intron	NA	NA	NA
ENSMUSG00000027713	1810062G17Rik	0.00130857	1.3797	protein_coding	protein_coding	protein_coding	NA	NA	NA
ENSMUSG00000058618	AY761184	7.69e-07	1.37985	protein_coding	protein_coding	protein_coding	NA	NA	NA
ENSMUSG00000042303	Sgsm3	5.04e-10	1.38007	protein_coding	protein_coding	protein_coding,nonsense_mediated_decay,processed_transcript,retained_intron	NA	NA	NA
ENSMUSG00000031387	Renbp	0.000359268	1.38225	protein_coding	protein_coding	protein_coding,retained_intron,processed_transcript,nonsense_mediated_decay	NA	NA	NA
ENSMUSG00000038793	Lefty1	0.0442321	1.38229	protein_coding	protein_coding	protein_coding,retained_intron	NA	NA	NA
ENSMUSG00000030849	Fgfr2	2.69e-05	1.3842	protein_coding	protein_coding	protein_coding,nonsense_mediated_decay,retained_intron	NA	NA	NA
ENSMUSG00000057933	Gsta2	0.0411237	1.38661	protein_coding	protein_coding	protein_coding,processed_transcript	NA	NA	NA
ENSMUSG00000024558	Mapk4	0.000371505	1.38739	protein_coding	protein_coding	protein_coding,nonsense_mediated_decay,processed_transcript	NA	NA	NA
ENSMUSG00000025498	Irf7	0.00786331	1.39015	protein_coding	protein_coding	protein_coding,retained_intron,nonsense_mediated_decay,processed_transcript	NA	NA	NA
ENSMUSG00000074063	Osgin1	1.93e-05	1.39222	protein_coding	protein_coding	protein_coding,processed_transcript,retained_intron	NA	NA	NA
ENSMUSG00000024533	Spire1	2.53e-13	1.39248	protein_coding	protein_coding	protein_coding	NA	NA	NA
ENSMUSG00000031227	Magee1	0.00829096	1.39702	protein_coding	protein_coding	protein_coding	NA	NA	NA
ENSMUSG00000051735	Rinl	0.00727782	1.39711	protein_coding	protein_coding	protein_coding,retained_intron,processed_transcript	NA	NA	NA
ENSMUSG00000027297	Ltk	0.000237981	1.39871	protein_coding	protein_coding	protein_coding,retained_intron	NA	NA	NA
ENSMUSG00000025978	Rftn2	0.000755815	1.40264	protein_coding	protein_coding	protein_coding,nonsense_mediated_decay,processed_transcript	NA	NA	NA
ENSMUSG00000040563	Plppr2	0.00179564	1.40529	protein_coding	protein_coding	protein_coding	NA	NA	NA
ENSMUSG00000031647	Mfap3l	0.014203	1.40974	protein_coding	protein_coding	protein_coding	NA	NA	NA
ENSMUSG00000025497	Cdhr5	6.58e-06	1.41173	protein_coding	protein_coding	protein_coding,nonsense_mediated_decay,retained_intron	NA	NA	NA
ENSMUSG00000024774	Ankrd22	0.000702187	1.41191	protein_coding	protein_coding	protein_coding,processed_transcript	NA	NA	NA
ENSMUSG00000048070	Pirt	3.93e-05	1.41227	protein_coding	protein_coding	protein_coding	NA	NA	NA
ENSMUSG00000067212	H2-T23	1.71e-10	1.41317	protein_coding	protein_coding	retained_intron,protein_coding	NA	NA	NA
ENSMUSG00000029570	Lfng	0.00945322	1.415	protein_coding	protein_coding	protein_coding,processed_transcript,retained_intron	NA	NA	NA
ENSMUSG00000048329	Mfsd6l	1.71e-12	1.4186	protein_coding	protein_coding	protein_coding	NA	NA	NA
ENSMUSG00000019831	Wasf1	0.0426093	1.42092	protein_coding	protein_coding	protein_coding	NA	NA	NA
ENSMUSG00000054893	Zfp667	3.63e-06	1.4216	protein_coding	protein_coding	protein_coding,retained_intron	NA	NA	NA
ENSMUSG00000038319	Kcnh2	8.85e-06	1.42183	protein_coding	protein_coding	protein_coding,processed_transcript	NA	NA	NA
ENSMUSG00000036368	Rmdn2	0.0100174	1.42194	protein_coding	protein_coding	protein_coding	NA	NA	NA
ENSMUSG00000033684	Qsox1	3.55e-10	1.42307	protein_coding	protein_coding	retained_intron,protein_coding,processed_transcript	NA	NA	NA
ENSMUSG00000057069	Ero1lb	1.79e-09	1.42503	protein_coding	protein_coding	protein_coding	NA	NA	NA
ENSMUSG00000035164	Zc3h12c	0.00296104	1.42655	protein_coding	protein_coding	protein_coding	NA	NA	NA
ENSMUSG00000032548	Slco2a1	3.1e-05	1.42757	protein_coding	protein_coding	processed_transcript,protein_coding,retained_intron,nonsense_mediated_decay	NA	NA	NA
ENSMUSG00000069920	B3gnt9	9.48e-05	1.42778	protein_coding	protein_coding	protein_coding	NA	NA	NA
ENSMUSG00000036181	Hist1h1c	8.79e-06	1.42929	protein_coding	protein_coding	protein_coding	NA	NA	NA
ENSMUSG00000007207	Stx1a	6.82e-10	1.42985	protein_coding	protein_coding	protein_coding,nonsense_mediated_decay,processed_transcript,retained_intron	NA	NA	NA
ENSMUSG00000032238	Rora	0.0206984	1.43005	protein_coding	protein_coding	protein_coding,processed_transcript,nonsense_mediated_decay	NA	NA	NA
ENSMUSG00000061845	Defa35	0.0305337	1.43067	protein_coding	protein_coding	protein_coding	NA	NA	NA
ENSMUSG00000003355	Fkbp11	4.35e-07	1.43131	protein_coding	protein_coding	protein_coding	NA	NA	NA
ENSMUSG00000038312	Edem2	3.51e-17	1.43188	protein_coding	protein_coding	protein_coding,processed_transcript,retained_intron	NA	NA	NA
ENSMUSG00000027602	Map1lc3a	6.37e-06	1.43271	protein_coding	protein_coding	protein_coding,processed_transcript	NA	NA	NA
ENSMUSG00000024033	Rsph1	0.00135126	1.43292	protein_coding	protein_coding	protein_coding	NA	NA	NA
ENSMUSG00000019986	Ahi1	0.00459495	1.43453	protein_coding	protein_coding	protein_coding,retained_intron,nonsense_mediated_decay,processed_transcript	NA	NA	NA
ENSMUSG00000070527	Mkrn3	0.0299314	1.43493	protein_coding	protein_coding	protein_coding	NA	NA	NA
ENSMUSG00000048807	Slc35e4	0.000146845	1.43557	protein_coding	protein_coding	protein_coding	NA	NA	NA
ENSMUSG00000074444	Defa30	0.00031516	1.43747	protein_coding	protein_coding	protein_coding	NA	NA	NA
ENSMUSG00000028389	Zfp37	0.00316868	1.43891	protein_coding	protein_coding	protein_coding,processed_transcript	NA	NA	NA
ENSMUSG00000027797	Dclk1	0.00832455	1.43941	protein_coding	protein_coding	protein_coding,retained_intron,processed_transcript	NA	NA	NA
ENSMUSG00000020120	Plek	0.000378559	1.44376	protein_coding	protein_coding	protein_coding	NA	NA	NA
ENSMUSG00000029377	Ereg	0.0326201	1.447	protein_coding	protein_coding	protein_coding	NA	NA	NA
ENSMUSG00000029166	Mapre3	0.0166257	1.45054	protein_coding	protein_coding	protein_coding,retained_intron	NA	NA	NA
ENSMUSG00000051344	Plekhm3	3.23e-05	1.45119	protein_coding	protein_coding	nonsense_mediated_decay,protein_coding,processed_transcript,retained_intron	NA	NA	NA
ENSMUSG00000059013	Sh2d3c	7.61e-05	1.45129	protein_coding	protein_coding	protein_coding,processed_transcript	NA	NA	NA
ENSMUSG00000028972	Car6	0.0168584	1.45131	protein_coding	protein_coding	protein_coding,processed_transcript	NA	NA	NA
ENSMUSG00000062826	Ces2f	0.0307957	1.45556	protein_coding	protein_coding	protein_coding,nonsense_mediated_decay	NA	NA	NA
ENSMUSG00000052135	Foxo6	1.41e-05	1.4664	protein_coding	protein_coding	protein_coding	NA	NA	NA
ENSMUSG00000033276	Stk36	0.00466411	1.46753	protein_coding	protein_coding	protein_coding,retained_intron,nonsense_mediated_decay,processed_transcript	NA	NA	NA
ENSMUSG00000017446	C1qtnf1	0.000437147	1.46966	protein_coding	protein_coding	protein_coding	NA	NA	NA
ENSMUSG00000026303	Mlph	2.19e-15	1.47085	protein_coding	protein_coding	protein_coding,retained_intron	NA	NA	NA
ENSMUSG00000044348	Slc25a53	0.00520817	1.47327	protein_coding	protein_coding	protein_coding,retained_intron,processed_transcript	NA	NA	NA
ENSMUSG00000002565	Scin	0.000710012	1.4733	protein_coding	protein_coding	protein_coding	NA	NA	NA
ENSMUSG00000044854	1700056E22Rik	0.0457767	1.47427	protein_coding	protein_coding	antisense,protein_coding	NA	NA	NA
ENSMUSG00000018920	Cxcl16	0.00125519	1.47529	protein_coding	protein_coding	protein_coding,nonsense_mediated_decay,retained_intron	NA	NA	NA
ENSMUSG00000070056	Mfhas1	2.63e-05	1.47743	protein_coding	protein_coding	protein_coding,processed_transcript	NA	NA	NA
ENSMUSG00000030643	Rab30	5.17e-05	1.4776	protein_coding	protein_coding	protein_coding,processed_transcript	NA	NA	NA
ENSMUSG00000072694	1500011B03Rik	9.31e-10	1.4816	protein_coding	protein_coding	protein_coding	NA	NA	NA
ENSMUSG00000069922	Ces3a	0.0109693	1.48369	protein_coding	protein_coding	protein_coding,retained_intron,processed_transcript	NA	NA	NA
ENSMUSG00000000560	Gabra2	0.0283125	1.48452	protein_coding	protein_coding	protein_coding,nonsense_mediated_decay,retained_intron,processed_transcript	NA	NA	NA
ENSMUSG00000024730	Ms4a8a	0.00810692	1.48595	protein_coding	protein_coding	protein_coding,retained_intron	NA	NA	NA
ENSMUSG00000035775	Krt20	0.00253192	1.48741	protein_coding	protein_coding	protein_coding	NA	NA	NA
ENSMUSG00000028207	Asph	5.8e-17	1.48766	protein_coding	protein_coding	processed_transcript,protein_coding	NA	NA	NA
ENSMUSG00000027931	Npr1	0.0197458	1.48938	protein_coding	protein_coding	protein_coding,retained_intron,processed_transcript,nonsense_mediated_decay	NA	NA	NA
ENSMUSG00000031972	Acta1	0.0148338	1.49252	protein_coding	protein_coding	protein_coding	NA	NA	NA
ENSMUSG00000049536	Tceal1	0.000240987	1.49384	protein_coding	protein_coding	protein_coding	NA	NA	NA
ENSMUSG00000029102	Hgfac	0.0109811	1.49573	protein_coding	protein_coding	protein_coding,retained_intron	NA	NA	NA
ENSMUSG00000026223	Itm2c	1.51e-10	1.49951	protein_coding	protein_coding	protein_coding,retained_intron	NA	NA	NA
ENSMUSG00000032726	Bmp8a	0.00186125	1.49967	protein_coding	protein_coding	protein_coding	NA	NA	NA
ENSMUSG00000025268	Maged2	2.38e-11	1.49988	protein_coding	protein_coding	protein_coding,retained_intron,processed_transcript	NA	NA	NA
ENSMUSG00000034818	Celf5	0.000303003	1.49991	protein_coding	protein_coding	protein_coding,retained_intron	NA	NA	NA
ENSMUSG00000022456	2003-09-01	0.00370994	1.50084	protein_coding	protein_coding	protein_coding	NA	NA	NA
ENSMUSG00000029828	4921507P07Rik	5.06e-07	1.50311	protein_coding	protein_coding	protein_coding	NA	NA	NA
ENSMUSG00000022941	Ripply3	0.0201088	1.50324	protein_coding	protein_coding	protein_coding	NA	NA	NA
ENSMUSG00000034758	Tle6	8e-07	1.50332	protein_coding	protein_coding	protein_coding,processed_transcript,retained_intron	NA	NA	NA
ENSMUSG00000029408	Abcb9	6.98e-12	1.50407	protein_coding	protein_coding	protein_coding,retained_intron,nonsense_mediated_decay,processed_transcript	NA	NA	NA
ENSMUSG00000044043	Pcdhb14	0.0488116	1.50452	protein_coding	protein_coding	protein_coding	NA	NA	NA
ENSMUSG00000079056	Kcnip3	0.0482975	1.50619	protein_coding	protein_coding	protein_coding,processed_transcript	NA	NA	NA
ENSMUSG00000018899	Irf1	3.32e-12	1.50681	protein_coding	protein_coding	protein_coding,processed_transcript,nonsense_mediated_decay,retained_intron	NA	NA	NA
ENSMUSG00000033389	Arhgap44	5.43e-06	1.51159	protein_coding	protein_coding	protein_coding	NA	NA	NA
ENSMUSG00000058624	Gda	0.0366942	1.51201	protein_coding	protein_coding	protein_coding,retained_intron	NA	NA	NA
ENSMUSG00000047139	Cd24a	9.32e-13	1.51446	protein_coding	protein_coding	processed_transcript,protein_coding	NA	NA	NA
ENSMUSG00000021265	Slc25a29	0.0063709	1.51452	protein_coding	protein_coding	protein_coding,retained_intron	NA	NA	NA
ENSMUSG00000020848	Doc2b	0.000622845	1.51716	protein_coding	protein_coding	protein_coding	NA	NA	NA
ENSMUSG00000039013	Siglecf	0.000115418	1.51761	protein_coding	protein_coding	protein_coding,retained_intron,processed_transcript	NA	NA	NA
ENSMUSG00000071648	Rom1	7.65e-06	1.51872	protein_coding	protein_coding	protein_coding	NA	NA	NA
ENSMUSG00000042734	Ttc9	0.00478683	1.51893	protein_coding	protein_coding	protein_coding	NA	NA	NA
ENSMUSG00000074345	Tnfaip8l3	0.00405459	1.51926	protein_coding	protein_coding	protein_coding,processed_transcript	NA	NA	NA
ENSMUSG00000079180	Mptx2	0.0182844	1.5195	protein_coding	protein_coding	protein_coding	NA	NA	NA
ENSMUSG00000023191	P3h3	0.0243181	1.52062	protein_coding	protein_coding	protein_coding,nonsense_mediated_decay,retained_intron	NA	NA	NA
ENSMUSG00000035067	Xkr6	0.000442736	1.52324	protein_coding	protein_coding	protein_coding,nonsense_mediated_decay,processed_transcript	NA	NA	NA
ENSMUSG00000018661	Cog1	2.15e-17	1.52357	protein_coding	protein_coding	protein_coding,retained_intron,nonsense_mediated_decay	NA	NA	NA
ENSMUSG00000053581	Zfand2a	0.00052941	1.52384	protein_coding	protein_coding	protein_coding,processed_transcript	NA	NA	NA
ENSMUSG00000012017	Scarf2	0.00169066	1.52559	protein_coding	protein_coding	protein_coding	NA	NA	NA
ENSMUSG00000038175	Mylip	0.000797089	1.52747	protein_coding	protein_coding	protein_coding	NA	NA	NA
ENSMUSG00000032656	2003-03-01	0.00109506	1.5336	protein_coding	protein_coding	protein_coding,retained_intron	NA	NA	NA
ENSMUSG00000022048	Dpysl2	1.56e-08	1.54024	protein_coding	protein_coding	protein_coding	NA	NA	NA
ENSMUSG00000034586	Hid1	4.66e-12	1.5438	protein_coding	protein_coding	protein_coding,processed_transcript	NA	NA	NA
ENSMUSG00000041729	Coro2b	0.0165885	1.54381	protein_coding	protein_coding	protein_coding,retained_intron	NA	NA	NA
ENSMUSG00000040061	Plcb2	2.63e-05	1.54779	protein_coding	protein_coding	protein_coding,retained_intron	NA	NA	NA
ENSMUSG00000036944	Tmem71	0.0042181	1.54831	protein_coding	protein_coding	protein_coding	NA	NA	NA
ENSMUSG00000027524	Edn3	0.0154896	1.54848	protein_coding	protein_coding	protein_coding,retained_intron,processed_transcript	NA	NA	NA
ENSMUSG00000024516	Sec11c	7.35e-20	1.5501	protein_coding	protein_coding	protein_coding,nonsense_mediated_decay,retained_intron,processed_transcript	NA	NA	NA
ENSMUSG00000034785	Dio1	9.28e-10	1.55024	protein_coding	protein_coding	protein_coding,nonsense_mediated_decay,processed_transcript	NA	NA	NA
ENSMUSG00000015094	Npdc1	6.29e-17	1.55438	protein_coding	protein_coding	processed_transcript,protein_coding	NA	NA	NA
ENSMUSG00000031668	Eif2ak3	4.56e-12	1.55452	protein_coding	protein_coding	protein_coding,retained_intron	NA	NA	NA
ENSMUSG00000045827	Serpinb9	1.54e-07	1.55555	protein_coding	protein_coding	protein_coding	NA	NA	NA
ENSMUSG00000032936	Camkv	0.0334286	1.56296	protein_coding	protein_coding	protein_coding,retained_intron,nonsense_mediated_decay	NA	NA	NA
ENSMUSG00000000317	Bcl6b	0.00121844	1.56304	protein_coding	protein_coding	protein_coding,retained_intron	NA	NA	NA
ENSMUSG00000103677	Pcdhga4	0.0343442	1.56463	protein_coding	protein_coding	protein_coding	NA	NA	NA
ENSMUSG00000054850	Smim10l2a	0.0304105	1.5667	protein_coding	protein_coding	protein_coding	NA	NA	NA
ENSMUSG00000039478	Micu3	0.00132534	1.56978	protein_coding	protein_coding	protein_coding,retained_intron	NA	NA	NA
ENSMUSG00000029762	Akr1b8	0.0024598	1.57305	protein_coding	protein_coding	protein_coding,processed_transcript	NA	NA	NA
ENSMUSG00000020668	Kif3c	3.36e-07	1.57625	protein_coding	protein_coding	protein_coding	NA	NA	NA
ENSMUSG00000037784	Dzip1l	0.0181705	1.5763	protein_coding	protein_coding	protein_coding,processed_transcript,retained_intron	NA	NA	NA
ENSMUSG00000028641	P3h1	0.00282764	1.57649	protein_coding	protein_coding	protein_coding,processed_transcript,nonsense_mediated_decay,retained_intron	NA	NA	NA
ENSMUSG00000027994	Ccdc109b	0.011567	1.57674	protein_coding	protein_coding	protein_coding,nonsense_mediated_decay	NA	NA	NA
ENSMUSG00000002107	Celf2	0.000649685	1.58002	protein_coding	protein_coding	protein_coding,nonsense_mediated_decay,processed_transcript,retained_intron	NA	NA	NA
ENSMUSG00000032015	Pou2f3	0.000429717	1.58077	protein_coding	protein_coding	protein_coding,retained_intron	NA	NA	NA
ENSMUSG00000032549	Rab6b	0.0005245	1.58253	protein_coding	protein_coding	protein_coding	NA	NA	NA
ENSMUSG00000053158	Fes	0.0262623	1.58547	protein_coding	protein_coding	nonsense_mediated_decay,protein_coding,retained_intron	NA	NA	NA
ENSMUSG00000034265	Zdhhc14	6.37e-06	1.58637	protein_coding	protein_coding	protein_coding	NA	NA	NA
ENSMUSG00000020900	Myh10	0.0132164	1.58852	protein_coding	protein_coding	processed_transcript,protein_coding,retained_intron	NA	NA	NA
[truncated: 1,193 more rows]
